# Supplementary material for: Controlling gene activation by enhancers through a drug-inducible topological insulator
Source: eLife. 2020 May 5;9:e47980. doi: 10.7554/eLife.47980 (PMC7200164; doi:10.7554/eLife.47980)
Supplement: Figure 1—source data 1. [file elife-47980-fig1-data1.xlsx]

## Sheet: Sheet1
Figure 1 - 4C-seq read counts in the intervals
	chr8	chr8	chr8	chr8
start	127825136	128775680	129187540	127825136
end	128718559	129187539	130742614	130742614
sample	left	30kb-440kb	440kb-right	3Mb(-VP10kb)
MYCprmt1_Hap_1	96319	296629	183017	609321
MYCprmt2_Hap_1	29865	79911	49640	167615
MYCprmt2_Hap_2	7152	20143	14230	43006
MYCprmt1_MYC-30_1	25642	117241	76742	234877
MYCprmt2_MYC-30_1	9088	28765	21582	62693
MYCprmt2_MYC-30_2	7263	31048	22605	64457
MYCprmt1_MYC+30_1	166887	87622	99057	390884
MYCprmt1_MYC+30_2	177266	98035	108297	429809
MYCprmt2_MYC+30_1	90767	46845	53762	207596
MYCprmt2_MYC+30_2	90329	47938	55530	213109
MYCprmt2_MYC+30_3	18345	11347	15211	50027
MYCprmt1_MYC+440_1	45574	110657	31219	201054
MYCprmt2_MYC+440_1	21755	38166	15559	79272
MYCprmt2_MYC+440_2	15625	35926	11194	65722
MYCprmt2_MYC+440_3	34891	84843	27380	155575
MYCprmt1_del30-440_1	7524	3	20051	28765
MYCprmt1_del30-440_2	11034	17	24745	37872
MYCprmt2_del30-440_1	10326	9	32982	45257
MYCprmt2_del30-440_2	7031	3	17613	26174
