# Supplementary material for: Controlling gene activation by enhancers through a drug-inducible topological insulator
Source: eLife. 2020 May 5;9:e47980. doi: 10.7554/eLife.47980 (PMC7200164; doi:10.7554/eLife.47980)
Supplement: Figure 2—source data 1. [file elife-47980-fig2-data1.xlsx]

## Sheet: RNAseq_HTseq
	ctrlHap_1	ctrlHap_2	ctrlHap_3	STITCH_1	STITCH_2	STITCH_3	del30-440_1	del30-440_2	del30-440_3
5S_rRNA	2	0	0	0	2	1	2	1	0
7SK	5	6	1	3	10	10	4	2	2
A1BG	1	4	2	2	3	3	5	1	1
A1BG-AS1	6	13	14	8	8	9	12	4	5
A1CF	2	1	1	1	0	1	0	1	1
A2M	91	0	9	11	22	14	9	3	4
A2M-AS1	10	1	8	6	6	4	3	4	5
A2ML1	66	36	58	53	37	39	58	39	58
A2ML1-AS1	1	0	0	2	0	1	1	0	0
A2ML1-AS2	1	0	0	0	0	0	0	1	0
A2MP1	1	0	2	1	0	0	2	3	2
A3GALT2	0	0	1	0	0	1	0	0	0
A4GALT	45	31	49	49	68	73	79	39	42
A4GNT	0	0	0	1	0	0	1	0	0
AA06	0	0	0	0	0	0	0	0	0
AAAS	784	452	926	490	535	540	610	413	475
AACS	649	491	1009	568	620	756	990	565	540
AACSP1	23	7	13	9	9	4	10	9	6
AADAC	0	0	0	0	0	0	0	0	0
AADACL2	0	0	0	0	0	0	0	0	0
AADACL2-AS1	0	0	0	0	0	0	0	0	0
AADACL3	6	4	3	3	4	6	8	6	2
AADACL4	1	0	0	1	0	0	0	0	0
AADACP1	0	0	0	0	0	0	0	0	0
AADAT	257	131	224	119	181	195	157	100	134
AAGAB	940	531	1046	647	555	608	676	515	591
AAK1	692	424	758	648	669	781	820	530	505
AAMDC	51	30	76	64	37	38	43	28	45
AAMP	1229	741	1537	955	859	913	1041	732	724
AANAT	5	2	3	4	1	1	7	2	1
AAR2	549	274	666	299	261	323	372	242	309
AARD	28	14	45	21	24	25	18	14	30
AARS	3415	1712	3383	2226	1988	2014	2895	1920	2308
AARS2	464	306	438	307	445	417	531	321	327
AARSD1	76	55	80	37	72	54	75	44	38
AARSP1	0	0	0	0	0	0	0	0	0
AASDH	275	153	316	195	185	220	305	184	192
AASDHPPT	663	391	655	440	364	413	441	345	405
AASS	7124	3494	5087	3878	4836	5056	9213	5128	3539
AATBC	4	5	6	2	5	9	2	4	0
AATF	1323	644	1353	804	658	656	846	618	709
AATK	26	32	46	31	40	39	65	27	24
AB015752.1	0	0	0	0	0	0	1	0	0
AB019440.1	0	0	0	0	0	0	0	0	0
ABALON	4	4	5	5	4	4	3	3	2
ABAT	100	74	139	143	155	149	217	121	120
ABBA01006766.1	0	0	0	0	0	0	0	0	0
ABC7-43041300I9.1	0	0	0	0	0	0	0	0	0
ABCA1	755	425	488	851	864	928	580	444	1170
ABCA10	5	5	8	1	2	4	6	4	4
ABCA11P	65	33	32	20	24	20	30	23	19
ABCA12	4	3	1	0	2	2	1	0	0
ABCA13	4	5	3	3	7	9	2	4	2
ABCA17P	3	0	1	2	0	2	5	1	3
ABCA2	79	61	132	72	132	103	148	93	79
ABCA3	104	73	104	116	133	116	211	117	109
ABCA4	2	1	2	0	1	4	0	3	4
ABCA5	220	171	238	115	155	219	309	188	119
ABCA6	0	0	0	0	0	0	0	0	0
ABCA7	109	96	112	151	203	216	198	127	110
ABCA8	3	2	1	0	4	1	2	2	2
ABCA9	1	2	0	0	0	2	1	0	0
ABCA9-AS1	0	0	3	0	0	4	1	2	2
ABCB1	14	11	16	10	9	4	5	5	8
ABCB10	283	220	242	172	186	202	184	140	142
ABCB10P1	0	0	0	1	1	1	1	1	2
ABCB10P3	0	2	1	0	0	0	0	0	0
ABCB10P4	1	1	2	0	2	0	3	0	0
ABCB11	0	2	0	2	0	0	0	1	1
ABCB4	28	9	14	16	10	5	6	8	10
ABCB5	0	0	0	0	1	1	3	1	0
ABCB6	44	30	31	28	45	42	31	23	24
ABCB7	603	374	587	405	420	407	588	313	420
ABCB8	187	163	259	126	205	224	176	147	134
ABCB9	61	55	81	41	44	44	28	36	27
ABCC1	1272	845	1197	1130	1043	935	1487	823	1011
ABCC10	271	207	274	195	179	235	313	199	177
ABCC11	5	1	1	0	2	4	3	2	1
ABCC12	1	0	0	0	0	0	0	1	1
ABCC13	0	0	1	2	1	2	1	0	1
ABCC2	7	11	16	16	13	10	18	10	11
ABCC3	4	3	2	3	3	1	2	1	6
ABCC4	244	196	263	159	134	144	213	140	158
ABCC5	1153	863	1107	734	932	878	1145	696	778
ABCC5-AS1	0	0	1	0	1	0	2	0	0
ABCC6	8	4	8	12	13	10	15	13	7
ABCC6P1	1	0	3	0	0	0	3	0	1
ABCC6P2	0	1	1	0	1	1	0	1	0
ABCC8	19	14	11	11	24	14	8	11	11
ABCC9	3	1	0	1	0	0	0	0	1
ABCD1	64	33	82	65	52	46	61	36	56
ABCD1P2	0	0	0	0	0	0	0	0	0
ABCD1P3	0	0	0	0	0	0	0	0	0
ABCD1P4	0	0	0	0	0	0	0	0	0
ABCD1P5	0	0	0	0	0	0	0	0	0
ABCD2	1	1	3	0	0	1	0	0	1
ABCD3	816	482	841	548	512	500	611	381	528
ABCD4	777	620	717	493	708	830	936	559	594
ABCE1	2450	1372	2659	1505	1154	1266	1454	1056	1284
ABCF1	0	0	0	0	0	0	1	0	0
ABCF2	310	212	353	186	151	184	182	155	145
ABCF2P1	2	1	4	0	6	3	1	3	0
ABCF2P2	0	0	0	0	0	0	0	0	0
ABCF3	537	344	682	389	371	380	480	339	371
ABCG1	68	48	62	51	55	71	53	42	58
ABCG2	73	25	35	25	25	13	23	16	43
ABCG4	3	4	7	10	15	11	13	8	10
ABCG5	0	1	1	0	0	2	0	1	2
ABCG8	1	0	1	2	2	2	3	1	2
ABHD1	6	5	9	9	7	4	13	6	8
ABHD10	348	159	370	220	108	200	217	134	193
ABHD11	183	99	176	110	158	140	184	108	130
ABHD11-AS1	1	0	2	0	0	0	0	0	1
ABHD12	753	536	763	597	583	514	638	441	560
ABHD12B	3	4	7	7	4	4	2	4	8
ABHD13	486	347	310	379	252	282	321	224	275
ABHD14A	22	11	12	10	14	5	10	7	12
ABHD14A-ACY1	1	1	0	0	1	2	0	0	0
ABHD14B	46	30	32	26	22	17	32	30	15
ABHD15	26	10	8	17	13	15	13	9	4
ABHD15-AS1	0	0	0	0	0	0	0	0	0
ABHD16A	0	0	0	0	0	0	0	0	0
ABHD16B	0	0	0	0	0	0	0	0	0
ABHD17A	151	135	196	105	141	190	195	116	116
ABHD17AP1	0	0	0	0	0	0	0	0	0
ABHD17AP2	0	0	0	0	0	0	0	0	0
ABHD17AP3	0	0	1	0	0	1	1	0	1
ABHD17AP4	0	0	0	0	0	0	0	0	0
ABHD17AP5	1	1	1	0	0	1	0	0	0
ABHD17AP6	0	0	1	0	0	0	0	1	0
ABHD17AP7	0	0	0	0	0	0	0	0	0
ABHD17AP8	0	0	0	0	0	0	0	0	0
ABHD17AP9	0	0	0	0	0	0	0	0	0
ABHD17B	739	455	950	572	479	584	693	458	471
ABHD17C	391	215	444	288	312	288	260	213	257
ABHD18	335	210	338	243	218	289	338	197	209
ABHD2	661	473	582	621	431	359	469	372	596
ABHD3	133	72	77	78	135	117	96	76	70
ABHD4	1077	572	1413	672	605	658	710	532	693
ABHD5	421	256	410	274	337	386	344	230	257
ABHD6	17	14	24	28	23	19	48	19	21
ABHD8	109	79	216	137	148	157	130	88	90
ABI1	655	312	647	464	401	436	465	315	380
ABI1P1	0	0	0	0	0	0	0	0	0
ABI2	2536	1529	2551	2011	2009	2033	2425	1641	1905
ABI3	45	20	58	22	14	28	32	13	21
ABI3BP	12	2	10	7	15	10	1	4	7
ABL1	1526	987	2230	1377	1169	1309	1660	1009	1066
ABL2	552	382	671	441	440	503	599	373	414
ABLIM1	1659	722	1514	815	723	754	911	618	746
ABLIM2	11	4	13	9	21	16	16	11	12
ABLIM3	7	6	9	8	8	18	6	7	8
ABO	2	1	2	1	3	2	3	0	0
ABR	486	302	710	487	485	443	677	422	404
ABRA	0	0	0	0	1	0	0	0	0
ABRACL	1205	573	1185	865	716	717	969	629	714
ABRAXAS1	162	94	183	135	111	110	194	110	128
ABRAXAS2	365	179	344	262	200	252	284	179	249
ABT1	340	216	477	278	243	263	268	189	261
ABT1P1	0	0	0	0	0	0	2	0	0
ABTB1	64	43	59	32	78	84	64	45	64
ABTB2	213	84	185	100	99	106	77	90	103
AC000003.1	0	0	0	0	0	0	0	0	0
AC000003.2	0	0	0	0	0	0	0	0	0
AC000029.1	0	0	0	0	0	0	0	0	0
AC000032.1	0	0	0	0	0	0	0	0	0
AC000035.1	0	0	0	0	0	0	0	0	0
AC000036.1	0	0	0	0	0	0	0	0	0
AC000041.1	0	0	0	0	0	0	0	0	0
AC000058.1	0	0	0	0	0	0	0	0	0
AC000061.1	0	0	0	0	0	0	0	0	0
AC000067.1	0	0	0	0	0	0	0	0	0
AC000068.1	10	11	20	18	11	11	12	11	16
AC000068.2	1	2	2	1	0	0	1	1	1
AC000068.3	0	0	0	0	0	0	0	0	0
AC000077.1	0	0	0	0	0	0	0	0	0
AC000078.1	0	0	0	0	0	0	0	0	0
AC000081.1	0	0	1	0	0	0	0	0	0
AC000089.1	50	28	74	50	38	33	51	40	44
AC000095.1	0	0	0	0	0	0	0	0	0
AC000095.2	0	0	0	0	0	0	0	0	0
AC000099.1	0	0	0	0	0	0	0	0	0
AC000111.1	0	0	0	0	0	0	0	0	0
AC000111.2	0	0	0	0	0	0	0	0	0
AC000120.1	2	1	6	1	4	4	0	1	0
AC000120.2	0	0	0	0	0	0	0	0	0
AC000120.3	0	0	0	0	0	0	0	0	0
AC000123.1	3	0	3	2	0	0	1	0	3
AC000123.2	1	0	0	0	1	0	0	0	1
AC000123.3	7	9	6	5	4	3	8	3	7
AC000124.1	0	0	0	0	0	0	0	0	0
AC000362.1	0	0	0	0	0	0	0	0	0
AC000367.1	1	0	1	0	1	1	1	0	0
AC000372.1	0	0	0	0	0	0	0	0	0
AC000374.1	0	0	1	0	0	0	0	0	0
AC000403.1	4	1	0	1	1	0	4	1	0
AC001226.1	1	0	2	0	1	0	1	1	0
AC002044.1	0	0	0	0	0	1	1	1	0
AC002044.2	0	0	0	0	1	0	0	0	0
AC002044.3	0	0	0	0	0	0	0	0	0
AC002056.1	8	5	16	7	10	6	9	7	4
AC002056.2	0	0	0	0	0	0	0	0	0
AC002059.1	2	0	1	1	1	1	3	0	0
AC002059.2	0	0	0	2	1	1	0	0	0
AC002064.1	1	0	1	0	0	0	0	0	0
AC002064.2	8	2	5	1	1	1	6	3	3
AC002064.3	0	0	0	0	0	0	0	0	0
AC002066.1	0	0	0	0	0	0	0	0	0
AC002066.2	0	0	0	0	0	0	0	0	0
AC002069.1	0	0	0	0	0	0	0	0	0
AC002069.2	0	0	0	0	0	0	0	0	0
AC002070.1	0	0	0	0	0	0	0	0	0
AC002074.1	1	0	0	1	1	0	0	0	2
AC002074.2	0	0	0	0	0	0	0	0	0
AC002075.1	0	0	0	0	0	0	0	0	0
AC002075.2	2	0	2	2	0	1	3	0	2
AC002076.1	1	0	0	0	0	0	1	1	0
AC002076.2	0	0	0	0	0	0	0	0	0
AC002090.1	0	0	0	1	0	0	0	0	0
AC002091.1	0	3	4	2	1	1	2	3	4
AC002091.2	6	2	4	3	2	4	6	2	4
AC002094.1	0	0	0	0	0	0	0	0	0
AC002094.2	0	0	0	0	0	0	0	0	0
AC002094.3	0	0	0	0	0	0	0	0	0
AC002094.4	2	0	1	1	0	1	2	0	0
AC002094.5	5	3	9	2	4	3	5	2	4
AC002101.1	0	0	0	0	0	0	0	0	0
AC002115.1	0	0	0	0	0	0	0	0	0
AC002116.1	0	0	0	0	0	0	0	0	0
AC002116.2	4	6	6	2	2	5	10	1	0
AC002127.1	0	0	0	0	0	0	0	0	0
AC002127.2	0	0	0	0	0	0	0	0	0
AC002128.1	12	12	11	9	12	13	27	12	9
AC002128.2	9	13	12	4	19	15	19	16	8
AC002306.1	0	0	0	0	1	0	0	0	0
AC002310.1	17	7	16	4	17	12	17	7	13
AC002310.2	0	0	0	0	0	0	0	0	1
AC002310.3	7	3	3	1	5	4	3	3	3
AC002310.4	0	0	0	0	0	0	0	0	0
AC002310.5	0	0	0	0	0	0	0	0	0
AC002310.6	12	10	28	13	13	16	16	6	6
AC002347.1	2	1	0	1	1	1	0	0	0
AC002347.2	1	1	2	0	1	0	0	0	0
AC002350.1	8	7	4	2	12	6	7	6	5
AC002351.1	5	3	2	5	0	2	3	2	6
AC002366.1	0	0	0	0	0	0	0	0	0
AC002367.1	0	1	2	1	0	0	1	0	0
AC002368.1	1	0	0	0	1	0	1	0	0
AC002375.1	0	0	0	0	0	0	0	0	0
AC002378.1	1	0	0	0	0	0	0	0	0
AC002381.1	0	0	0	0	0	0	0	0	0
AC002383.1	0	0	0	0	0	0	0	0	0
AC002386.1	0	0	0	0	0	0	0	0	0
AC002395.1	0	0	0	0	0	0	0	0	0
AC002398.1	0	1	0	1	4	0	0	2	0
AC002398.2	0	0	0	0	0	0	0	0	0
AC002400.1	0	1	0	1	0	4	0	1	1
AC002401.1	0	0	0	0	1	0	0	0	0
AC002401.2	0	0	0	0	0	2	1	0	0
AC002401.3	3	0	0	1	0	0	3	0	0
AC002401.4	0	0	1	0	0	0	0	0	0
AC002407.1	68	44	56	38	75	46	70	49	50
AC002428.1	0	1	0	0	0	0	0	0	0
AC002428.2	0	0	1	1	0	0	0	0	0
AC002429.1	0	0	0	0	0	0	0	0	0
AC002429.2	0	2	1	1	2	7	1	2	0
AC002451.1	0	0	0	0	1	0	0	1	0
AC002451.2	0	0	0	0	0	0	0	0	0
AC002454.1	6	1	10	0	6	6	4	1	5
AC002456.1	5	1	2	1	1	0	5	1	2
AC002456.2	0	0	0	0	0	0	0	0	0
AC002460.1	0	0	0	0	0	0	0	0	0
AC002463.1	0	0	0	0	0	1	1	0	0
AC002464.1	0	0	0	0	0	0	0	0	0
AC002465.1	0	0	0	0	0	0	0	0	0
AC002467.1	23	8	29	13	15	13	10	7	11
AC002470.1	0	1	2	1	1	0	2	1	0
AC002470.2	0	0	0	0	0	0	0	0	0
AC002472.1	0	0	0	0	0	0	0	0	0
AC002472.2	0	0	0	0	0	0	0	0	0
AC002472.3	0	0	0	0	0	1	0	0	0
AC002472.4	0	0	0	0	0	0	0	0	0
AC002477.1	0	0	0	0	0	0	0	0	0
AC002480.1	8	3	4	3	3	0	2	2	2
AC002480.2	3	0	5	0	0	2	2	0	2
AC002485.1	0	0	0	0	0	0	0	0	0
AC002486.1	0	0	0	0	0	0	0	0	0
AC002486.2	1	0	0	0	0	0	0	0	1
AC002487.1	0	0	0	0	0	0	0	0	0
AC002504.1	0	0	0	0	0	0	0	0	0
AC002511.1	0	0	0	0	0	0	0	0	0
AC002511.2	0	0	0	0	0	0	0	0	0
AC002519.1	1	1	1	1	4	4	1	2	2
AC002519.2	1	0	1	0	0	0	0	0	1
AC002524.1	42	13	43	23	37	27	33	18	40
AC002525.1	0	1	2	2	4	2	4	2	0
AC002539.2	0	0	0	0	0	0	0	0	0
AC002540.1	0	0	0	0	0	0	0	0	0
AC002542.1	1	0	0	0	0	0	0	0	0
AC002543.1	2	0	0	0	0	0	1	0	0
AC002545.1	8	7	12	7	3	4	2	4	5
AC002546.1	0	0	0	0	0	0	0	0	0
AC002550.1	4	1	3	1	3	4	0	2	1
AC002550.2	23	5	8	9	7	14	14	6	2
AC002551.1	0	0	0	0	0	0	1	1	0
AC002553.1	16	12	10	7	9	9	13	9	8
AC002553.2	9	3	7	0	9	11	4	3	4
AC002558.1	2	1	0	3	0	3	1	0	1
AC002558.2	1	0	0	0	0	0	0	0	0
AC002558.3	8	4	2	0	10	4	0	1	0
AC002563.1	2	2	1	2	1	3	1	1	1
AC002978.1	0	0	0	0	0	0	0	0	0
AC002979.1	0	0	0	0	0	0	0	0	0
AC002981.1	0	0	0	0	0	0	0	0	0
AC002984.1	0	0	0	0	0	0	0	0	0
AC002985.1	0	0	0	0	0	0	0	0	0
AC002992.1	0	0	0	0	0	0	0	0	0
AC002994.1	0	0	0	0	0	0	0	0	0
AC002996.1	0	0	0	0	0	0	0	0	0
AC003001.1	1	0	0	0	0	0	0	0	0
AC003001.2	0	0	1	0	0	0	0	1	0
AC003002.1	0	0	0	0	0	0	0	0	0
AC003002.2	1	0	1	0	0	1	0	0	0
AC003002.3	1	0	0	0	0	0	0	0	2
AC003005.1	0	0	0	0	0	0	0	0	0
AC003005.2	2	0	2	1	0	1	2	2	1
AC003006.1	0	0	0	0	0	0	0	0	0
AC003009.1	0	0	0	0	0	0	0	0	1
AC003029.1	0	0	0	0	0	0	0	0	0
AC003035.1	0	0	0	0	0	0	0	0	0
AC003035.2	0	0	0	1	0	1	0	0	0
AC003043.1	1	0	0	0	0	0	0	0	0
AC003043.2	0	0	1	0	0	0	1	1	1
AC003045.1	0	0	0	0	0	0	0	0	0
AC003070.1	0	0	0	0	0	0	0	0	0
AC003070.2	0	0	0	0	0	0	0	0	0
AC003071.1	0	0	0	0	0	0	0	0	0
AC003071.2	0	0	0	0	0	0	0	0	0
AC003072.1	2	2	1	0	3	2	2	0	2
AC003079.1	0	0	0	0	0	1	0	0	0
AC003080.1	0	1	1	0	0	0	0	0	0
AC003084.1	0	0	0	0	0	0	0	0	0
AC003087.1	0	0	0	0	0	0	0	0	0
AC003092.1	0	0	0	0	0	0	0	0	0
AC003092.2	0	0	0	0	0	0	0	0	0
AC003098.1	0	0	0	0	0	0	0	0	0
AC003101.1	0	0	0	0	0	0	0	0	0
AC003101.2	0	1	0	0	0	0	0	0	0
AC003101.3	0	0	0	0	0	0	0	0	0
AC003102.1	20	8	27	24	47	25	38	23	15
AC003658.1	0	0	0	0	0	0	0	0	0
AC003659.1	0	0	0	0	1	1	0	0	0
AC003666.1	0	0	0	0	0	0	0	0	0
AC003669.1	0	0	0	0	0	0	0	0	0
AC003681.1	34	39	43	25	66	63	83	43	27
AC003682.1	2	0	0	0	4	0	0	1	1
AC003684.1	0	0	0	0	0	0	0	0	0
AC003685.1	0	0	0	0	0	0	0	0	0
AC003685.2	0	0	0	0	1	0	0	0	0
AC003686.1	0	0	0	0	0	0	0	0	0
AC003687.1	0	0	0	0	0	0	0	0	0
AC003688.1	0	0	0	0	0	0	0	0	0
AC003688.2	1	0	0	0	0	0	0	0	0
AC003950.1	0	0	0	0	0	0	0	0	0
AC003956.1	3	2	1	2	0	6	3	0	3
AC003957.1	0	0	0	0	1	0	0	0	0
AC003958.1	0	0	0	0	0	0	0	0	0
AC003958.2	0	0	0	0	0	0	0	0	0
AC003965.1	3	0	1	1	0	0	1	0	0
AC003965.2	0	0	0	0	0	0	0	0	0
AC003968.1	0	0	1	1	0	0	1	0	0
AC003973.1	0	0	0	0	0	0	0	0	0
AC003973.2	0	0	0	0	0	0	0	0	0
AC003973.3	0	0	0	0	0	0	0	0	0
AC003975.1	4	0	6	2	1	2	5	3	4
AC003982.1	0	0	0	0	0	0	0	0	0
AC003984.1	0	0	0	0	0	0	0	0	0
AC003985.1	0	0	0	0	0	0	0	0	0
AC003985.2	0	0	0	0	0	0	0	0	0
AC003986.1	0	0	0	0	0	0	0	0	0
AC003986.2	0	0	0	0	0	0	0	0	0
AC003986.3	0	0	0	0	0	0	0	0	0
AC003988.1	0	0	0	0	0	0	0	0	0
AC003989.1	0	0	0	0	0	0	0	0	0
AC003989.2	0	0	0	0	0	0	0	0	0
AC003991.1	0	0	0	0	1	0	2	0	1
AC003991.2	0	0	0	1	1	0	2	0	1
AC003992.1	0	0	0	0	0	0	0	0	0
AC004000.1	0	0	0	2	1	0	2	0	0
AC004004.1	0	0	0	0	0	0	0	0	0
AC004006.1	0	0	0	0	0	0	0	0	0
AC004009.1	0	0	0	0	0	0	0	0	0
AC004009.2	0	0	0	0	0	0	0	0	0
AC004009.3	0	0	0	0	0	0	0	0	0
AC004012.1	0	0	1	0	0	0	0	0	0
AC004014.1	0	0	0	0	0	0	0	0	0
AC004014.2	0	0	0	0	0	0	0	0	0
AC004016.1	0	0	0	0	0	0	0	0	0
AC004017.1	7	2	5	2	3	6	4	4	3
AC004019.18	0	0	0	0	0	0	0	0	0
AC004022.1	0	0	0	0	0	0	0	1	0
AC004022.2	0	0	0	0	0	0	0	0	0
AC004023.1	0	0	3	0	1	0	3	0	1
AC004024.1	2	0	0	0	0	1	1	0	0
AC004034.1	3	1	2	1	1	3	5	3	2
AC004039.1	0	0	1	2	3	2	4	1	1
AC004052.1	0	0	0	0	0	0	0	0	0
AC004053.1	1	0	0	0	0	0	0	0	0
AC004054.1	0	0	0	0	0	0	0	0	0
AC004057.1	0	0	1	0	0	0	1	0	0
AC004062.1	0	0	0	0	0	0	0	0	0
AC004063.1	0	0	0	0	0	0	0	0	0
AC004066.1	6	3	8	5	8	7	3	10	4
AC004066.2	0	0	0	0	0	0	0	0	0
AC004067.1	3	5	4	4	2	7	10	6	2
AC004069.1	0	0	0	0	0	1	2	0	0
AC004069.2	0	0	0	0	0	0	0	0	0
AC004074.1	0	0	0	0	0	0	0	0	0
AC004076.1	0	2	0	0	3	0	0	1	1
AC004076.2	29	17	23	12	31	28	21	17	7
AC004079.1	0	0	0	0	0	0	0	0	0
AC004080.1	0	0	0	0	0	0	0	0	0
AC004080.2	0	0	0	0	0	0	0	0	0
AC004080.3	0	0	0	0	0	0	0	0	0
AC004080.4	0	0	0	0	0	0	0	0	0
AC004080.5	0	0	0	0	0	0	0	0	0
AC004080.6	0	0	0	0	0	0	0	0	0
AC004112.1	2	2	2	6	3	3	4	1	2
AC004129.1	0	0	0	1	0	0	0	0	0
AC004129.2	0	0	0	0	0	0	0	0	0
AC004129.3	0	0	0	0	0	0	0	0	0
AC004130.1	4	0	7	4	6	1	1	6	3
AC004134.1	0	0	0	1	0	0	0	0	0
AC004147.1	2	1	0	0	0	1	0	1	1
AC004147.2	28	7	34	15	20	14	24	24	12
AC004147.3	0	0	0	0	0	0	0	0	0
AC004147.4	0	0	0	0	0	0	0	0	0
AC004147.5	0	1	0	0	0	0	0	0	0
AC004148.1	1	1	0	0	0	0	0	0	0
AC004148.2	159	93	135	73	97	114	155	102	96
AC004156.1	0	0	1	0	0	1	0	0	0
AC004158.1	2	2	0	0	4	6	0	3	1
AC004160.1	2	0	0	0	1	4	3	0	0
AC004160.2	0	0	0	0	0	1	0	0	0
AC004217.1	0	0	0	0	0	0	0	0	0
AC004217.2	0	0	0	0	0	0	0	0	0
AC004221.1	2	2	3	1	1	3	6	3	5
AC004223.1	0	0	0	0	0	0	0	0	0
AC004223.2	0	0	0	0	0	1	0	0	0
AC004223.3	0	0	2	0	1	0	1	2	0
AC004224.1	0	0	0	0	0	0	0	0	0
AC004224.2	0	0	0	0	0	0	0	0	0
AC004231.1	0	0	0	0	0	0	0	0	0
AC004231.3	0	0	0	0	0	0	0	0	1
AC004232.1	0	0	0	0	0	0	0	0	0
AC004232.2	0	0	0	0	0	0	0	0	0
AC004232.3	5	2	6	4	2	3	5	1	2
AC004233.1	0	0	0	2	1	3	1	3	0
AC004233.2	9	11	19	5	11	10	10	2	7
AC004233.3	40	24	49	20	22	25	29	14	29
AC004233.4	1	0	1	4	1	1	2	0	1
AC004241.1	2	1	8	2	1	3	4	3	3
AC004241.2	0	0	0	0	0	0	0	0	1
AC004241.3	9	11	10	2	7	8	5	6	8
AC004241.4	6	4	2	1	1	1	4	1	3
AC004241.5	2	1	2	0	0	0	0	0	0
AC004253.1	10	8	10	3	11	5	11	9	9
AC004253.2	0	0	0	0	0	0	0	1	0
AC004257.1	0	0	0	0	0	1	0	1	3
AC004263.1	8	6	5	2	1	9	2	0	1
AC004264.1	2	1	2	0	2	1	2	2	3
AC004264.2	1	0	1	0	0	0	0	0	0
AC004381.1	0	0	0	1	0	0	0	0	0
AC004381.2	0	0	0	0	0	0	0	0	0
AC004381.3	0	0	0	0	0	0	0	0	0
AC004383.1	3	5	5	6	3	7	5	3	2
AC004386.1	4	2	2	3	3	2	2	4	3
AC004386.2	0	0	0	0	0	0	0	0	0
AC004408.1	0	0	0	0	0	0	0	0	0
AC004408.2	0	0	0	0	0	0	0	0	0
AC004415.1	0	0	0	0	0	0	0	0	0
AC004448.1	0	0	0	0	0	0	0	0	0
AC004448.2	1	0	1	1	2	1	3	0	0
AC004448.3	0	0	0	0	0	0	0	0	0
AC004449.1	0	0	1	3	0	0	2	1	0
AC004453.1	14	7	13	12	13	9	13	5	11
AC004453.2	0	1	0	0	1	2	1	1	0
AC004458.1	0	0	0	0	0	0	0	0	0
AC004460.1	0	0	0	0	1	0	0	0	0
AC004461.1	0	1	0	0	1	0	0	1	0
AC004461.2	5	5	7	3	3	2	5	2	6
AC004466.1	0	1	2	0	1	0	7	4	2
AC004466.2	5	3	3	3	1	2	2	5	3
AC004466.3	2	1	0	0	2	0	3	3	1
AC004467.1	0	0	1	0	0	0	0	0	0
AC004470.1	0	0	2	0	1	0	0	0	0
AC004471.1	0	2	1	3	1	2	0	2	0
AC004471.2	0	0	1	1	3	4	1	0	1
AC004477.1	13	6	11	11	7	9	20	11	11
AC004477.2	0	0	0	0	0	0	0	0	0
AC004477.3	9	7	14	4	9	14	8	9	8
AC004485.1	0	2	1	3	1	2	0	4	1
AC004486.1	0	0	1	0	0	0	0	0	0
AC004490.1	4	1	0	1	1	0	0	2	0
AC004491.1	4	0	3	2	5	5	2	1	1
AC004492.1	5	5	6	5	6	4	7	2	2
AC004494.1	2	0	0	0	2	1	1	2	1
AC004494.2	0	0	0	0	0	0	0	0	0
AC004520.1	0	0	0	0	0	0	0	0	0
AC004522.1	0	0	0	0	0	0	0	0	0
AC004522.2	6	2	4	3	1	6	4	5	2
AC004528.1	0	0	0	0	0	0	0	0	0
AC004528.2	0	0	0	0	0	0	0	0	0
AC004540.1	14	3	11	5	4	10	13	5	8
AC004540.2	3	1	2	6	3	6	2	2	1
AC004542.1	0	0	0	0	0	0	0	0	0
AC004542.2	0	0	0	0	0	0	0	0	0
AC004543.1	2	0	0	0	1	0	0	1	1
AC004551.1	0	0	0	0	0	0	0	0	0
AC004552.1	0	0	0	3	0	0	2	1	0
AC004554.1	1	0	0	1	0	0	0	0	0
AC004554.2	3	3	0	0	2	0	1	1	0
AC004584.1	2	0	1	0	1	1	0	2	0
AC004584.2	1	0	0	0	1	0	0	0	0
AC004584.3	0	0	0	0	0	0	4	2	1
AC004585.1	0	0	0	0	0	0	0	1	0
AC004585.2	0	0	0	0	0	0	0	0	0
AC004590.1	0	0	0	0	0	0	0	0	0
AC004593.1	0	0	1	0	0	0	0	0	0
AC004593.2	0	0	0	0	0	0	0	0	0
AC004594.1	2	2	1	3	5	3	4	5	1
AC004595.1	0	0	0	0	0	0	0	0	0
AC004596.1	1	2	2	2	0	3	2	3	1
AC004597.1	0	0	0	0	0	0	0	0	0
AC004623.1	4	3	3	4	9	5	6	2	3
AC004637.1	2	0	0	1	0	2	0	0	0
AC004655.1	0	0	0	0	0	0	0	0	0
AC004656.1	431	314	451	419	467	500	326	250	223
AC004672.1	0	1	0	0	0	0	0	0	0
AC004672.2	0	0	0	0	0	0	0	0	0
AC004673.1	0	0	0	0	0	0	1	0	0
AC004674.1	0	0	0	0	0	0	0	0	0
AC004678.1	2	4	3	0	1	2	3	0	1
AC004678.2	3	2	3	2	2	4	1	3	0
AC004687.1	1	2	4	0	0	0	2	0	0
AC004687.2	1	1	4	0	2	1	4	0	3
AC004690.1	0	0	0	0	0	0	0	0	0
AC004690.2	0	0	0	0	0	2	0	0	1
AC004691.1	0	2	0	0	0	1	0	2	0
AC004691.2	0	0	0	0	0	0	0	0	0
AC004692.1	0	0	0	0	0	0	1	0	0
AC004692.2	0	1	0	1	1	1	0	0	0
AC004696.1	2	0	1	2	1	2	3	0	2
AC004696.2	0	0	1	1	0	1	1	0	2
AC004699.1	0	0	0	0	0	0	0	0	0
AC004702.1	0	0	0	0	0	0	0	0	0
AC004704.1	0	0	0	0	0	1	0	0	0
AC004706.1	6	5	6	8	4	9	10	8	6
AC004706.2	0	0	0	0	0	0	0	0	0
AC004706.3	89	67	109	78	64	65	60	58	73
AC004707.1	0	0	0	0	0	2	0	1	0
AC004745.1	0	0	0	0	0	0	0	0	0
AC004754.1	0	1	0	0	0	0	0	0	0
AC004765.1	1	0	2	2	1	1	4	0	1
AC004769.1	0	0	0	0	0	0	0	0	0
AC004771.1	5	2	5	0	2	3	4	3	2
AC004771.2	1	0	0	0	0	0	0	0	1
AC004771.3	4	4	7	8	3	7	9	3	4
AC004771.4	0	0	0	0	0	0	0	0	0
AC004771.5	3	1	3	3	2	2	6	2	5
AC004775.1	0	0	0	0	0	0	0	0	0
AC004777.1	0	0	2	0	0	0	0	0	0
AC004784.1	0	0	0	0	0	0	0	0	0
AC004790.1	0	0	0	0	0	0	0	0	0
AC004790.2	0	0	0	0	0	0	0	0	0
AC004801.1	13	5	16	4	6	4	2	7	5
AC004801.2	11	9	12	5	8	9	1	8	8
AC004801.3	0	0	0	0	0	2	0	0	0
AC004801.4	0	0	0	0	0	0	0	0	0
AC004801.5	0	0	0	0	0	0	0	0	0
AC004801.6	4	1	5	3	1	3	6	3	1
AC004801.7	5	1	3	0	0	1	0	0	3
AC004803.1	19	7	12	28	6	29	33	12	9
AC004805.1	0	0	0	0	0	0	0	0	0
AC004805.2	0	0	0	0	0	0	0	0	0
AC004805.3	0	0	0	0	0	0	0	0	0
AC004808.1	0	0	0	0	0	0	0	0	0
AC004808.2	0	0	0	0	0	0	0	0	0
AC004812.1	0	0	0	0	0	0	0	0	0
AC004812.2	35	22	43	24	25	21	36	23	22
AC004816.1	65	24	74	59	43	45	74	46	37
AC004816.2	0	1	2	3	1	3	2	2	0
AC004817.1	0	0	0	0	0	0	0	0	0
AC004817.2	0	0	0	0	0	1	0	0	0
AC004817.3	0	0	0	1	0	0	0	0	0
AC004817.4	0	0	0	0	0	1	0	0	1
AC004824.1	0	0	0	0	0	0	0	0	0
AC004824.2	0	0	0	0	0	0	0	0	0
AC004825.1	0	0	0	0	0	0	0	0	0
AC004825.2	6	2	13	9	4	7	1	3	13
AC004828.1	0	0	0	0	0	0	2	0	0
AC004830.1	6	12	10	23	20	13	47	21	12
AC004832.1	0	0	0	0	0	0	0	0	0
AC004832.2	0	0	0	0	0	0	0	0	0
AC004832.3	0	0	0	0	0	0	0	0	0
AC004832.4	2	2	0	0	0	0	3	0	1
AC004832.5	0	0	1	0	0	0	2	0	0
AC004832.6	1	0	0	0	0	0	2	0	0
AC004834.1	1	2	3	2	1	6	10	3	1
AC004835.1	3	1	0	0	4	0	1	1	0
AC004835.2	0	0	0	0	0	0	0	0	0
AC004836.1	1	0	0	0	0	1	0	0	0
AC004837.1	0	0	0	0	0	0	0	0	0
AC004837.2	2	3	2	5	4	1	3	0	3
AC004837.3	0	0	0	0	0	0	0	0	0
AC004839.1	1	1	1	0	1	2	0	1	1
AC004840.1	1	2	1	0	1	2	0	0	0
AC004840.2	0	0	0	0	0	0	0	0	0
AC004846.1	6	4	4	5	16	9	17	8	7
AC004846.2	4	6	5	11	9	8	11	5	4
AC004847.1	0	0	0	0	1	0	0	0	0
AC004851.1	0	0	0	0	0	1	0	0	0
AC004852.1	0	0	0	0	0	0	0	0	0
AC004852.2	0	0	0	0	0	0	0	0	0
AC004852.3	0	0	0	0	0	0	0	0	0
AC004853.1	0	0	0	0	0	0	0	0	0
AC004854.1	0	0	0	0	0	0	0	0	0
AC004854.2	1	3	3	1	1	0	1	0	2
AC004858.1	0	0	0	0	1	0	0	0	0
AC004862.1	0	0	0	0	0	0	0	0	0
AC004865.1	0	0	0	0	0	0	0	0	0
AC004865.2	0	1	0	0	1	0	3	1	0
AC004866.1	0	0	0	0	0	0	0	0	0
AC004866.2	0	0	0	0	0	0	0	0	0
AC004869.1	0	0	0	0	0	0	0	0	0
AC004869.2	0	0	0	0	0	0	0	0	0
AC004870.1	0	0	0	0	0	0	0	0	0
AC004870.2	0	0	0	0	0	0	0	0	0
AC004870.3	0	0	0	0	0	0	0	0	0
AC004870.4	0	0	0	0	0	0	0	0	0
AC004872.1	0	0	0	0	0	0	0	0	0
AC004875.1	0	1	0	0	0	0	0	1	0
AC004877.1	0	0	0	0	1	1	1	0	0
AC004877.2	1	0	1	1	0	0	2	0	1
AC004878.3	0	0	0	0	0	0	0	0	0
AC004878.5	0	0	0	0	0	0	0	0	0
AC004878.6	0	0	0	0	0	0	0	0	0
AC004878.7	0	0	0	0	0	0	0	0	0
AC004882.1	0	0	0	0	0	0	0	0	0
AC004882.2	0	0	0	0	0	0	0	0	0
AC004884.1	3	2	0	1	1	0	0	1	0
AC004884.2	0	1	0	0	1	0	0	0	0
AC004888.1	0	0	0	1	2	0	1	0	0
AC004889.1	39	15	23	17	10	16	19	10	19
AC004890.1	15	5	23	12	3	6	12	8	9
AC004890.2	11	19	15	12	32	23	34	28	33
AC004890.3	1	2	1	1	0	0	1	2	1
AC004893.1	2	2	0	0	1	3	2	1	0
AC004893.2	0	0	0	0	0	0	0	0	0
AC004895.1	0	0	0	1	1	1	2	0	1
AC004898.1	1	2	3	0	2	3	0	2	1
AC004899.1	0	0	1	1	0	0	1	0	0
AC004899.2	0	0	0	0	0	0	0	0	0
AC004900.1	1	0	3	1	0	0	2	0	0
AC004906.1	0	0	0	0	0	1	0	0	0
AC004908.1	0	0	2	0	2	2	0	0	0
AC004908.2	4	1	7	7	2	0	4	2	4
AC004908.3	0	0	0	0	2	0	0	0	0
AC004910.1	0	0	0	0	0	0	0	1	0
AC004911.1	0	0	0	0	0	0	0	0	0
AC004917.1	0	0	0	0	0	0	0	0	0
AC004918.1	6	6	3	9	8	0	2	4	6
AC004918.3	42	14	35	25	32	35	39	24	26
AC004920.1	0	0	0	0	0	0	0	0	0
AC004921.1	0	0	0	1	0	0	0	0	0
AC004922.1	1	0	0	0	0	1	0	0	0
AC004923.1	2	0	5	3	4	5	2	3	1
AC004923.2	0	0	0	0	0	0	0	0	0
AC004923.3	0	0	0	0	0	0	0	0	0
AC004923.4	10	1	4	4	4	4	7	7	4
AC004924.1	0	0	0	0	0	0	0	0	0
AC004925.1	5	1	0	1	2	1	1	1	3
AC004930.1	0	0	0	0	0	0	0	0	0
AC004936.1	0	0	0	0	0	0	0	0	0
AC004938.1	0	0	0	0	0	0	0	0	0
AC004941.1	0	1	0	0	0	0	1	0	0
AC004941.2	0	0	0	0	0	0	2	0	1
AC004943.1	24	8	20	8	13	16	10	8	9
AC004943.2	70	36	61	39	50	43	51	43	40
AC004943.3	1	1	0	0	0	0	0	0	0
AC004944.1	0	0	0	0	0	0	0	0	0
AC004945.1	0	0	0	0	0	0	0	0	0
AC004946.1	0	0	0	0	0	0	0	0	0
AC004947.1	0	0	0	0	0	0	0	0	0
AC004948.1	0	1	1	0	0	0	0	0	0
AC004949.1	0	0	0	0	0	0	0	0	0
AC004951.1	1	2	3	1	1	2	1	0	1
AC004951.2	3	5	1	3	1	5	5	0	1
AC004951.3	0	0	0	0	0	0	0	1	0
AC004951.4	0	1	2	1	2	0	1	2	0
AC004965.1	0	0	0	0	0	0	0	0	0
AC004967.1	3	5	11	6	6	4	12	4	6
AC004967.2	7	9	6	3	6	9	15	4	6
AC004969.1	0	0	1	0	1	0	0	0	0
AC004972.1	0	0	0	0	0	0	0	0	0
AC004973.1	0	0	0	0	1	0	0	0	0
AC004974.1	0	0	0	0	0	1	0	0	0
AC004975.1	0	1	3	2	5	3	1	2	2
AC004975.2	0	0	0	0	0	0	0	0	0
AC004980.1	23	19	25	11	16	18	27	13	7
AC004980.2	0	0	2	0	1	0	0	1	1
AC004980.3	0	0	0	0	0	0	0	0	0
AC004980.4	0	0	0	0	0	0	0	0	0
AC004982.1	13	3	4	3	7	10	10	3	5
AC004982.2	20	12	17	22	21	15	28	18	23
AC004986.1	0	1	0	0	0	0	0	0	0
AC004987.1	0	0	0	0	1	0	1	0	0
AC004987.2	202	117	242	131	115	125	160	123	135
AC004987.3	0	0	0	0	0	0	0	0	0
AC004987.4	0	0	0	0	0	0	0	0	0
AC004988.1	3	0	0	2	0	0	0	0	0
AC004990.1	9	2	3	4	3	4	1	2	6
AC004994.1	0	0	0	0	0	0	0	0	0
AC004997.1	0	0	0	0	1	0	0	0	0
AC005000.1	1	2	2	2	1	1	0	0	2
AC005000.2	0	0	0	0	0	0	0	0	0
AC005002.1	1	0	0	0	0	0	0	0	1
AC005002.2	0	0	0	0	0	0	0	0	0
AC005005.1	0	0	1	0	0	0	0	0	1
AC005005.2	0	0	0	0	0	0	0	0	0
AC005005.3	4	3	7	0	3	5	3	3	3
AC005005.4	0	3	0	0	0	0	3	2	0
AC005006.1	0	0	4	0	1	0	0	0	0
AC005008.1	0	0	0	0	0	0	0	0	0
AC005008.2	0	0	0	0	0	0	0	0	0
AC005009.1	0	1	0	0	0	0	1	0	1
AC005009.2	1	0	0	0	1	0	1	0	0
AC005011.1	0	0	0	0	0	0	0	0	0
AC005013.1	0	0	0	0	2	0	0	0	1
AC005014.1	2	0	5	0	2	2	0	1	0
AC005014.2	1	0	5	0	1	2	0	1	3
AC005014.3	0	0	0	0	0	0	0	0	0
AC005019.1	0	0	1	0	0	0	1	0	1
AC005019.2	0	0	0	0	1	0	0	0	0
AC005020.1	1	0	1	2	0	4	2	0	0
AC005020.2	0	0	0	0	0	0	0	0	0
AC005021.1	1	1	1	1	0	0	0	0	0
AC005033.1	0	0	0	0	0	0	0	0	0
AC005034.1	0	0	0	0	0	0	0	0	0
AC005034.2	0	1	0	0	0	1	1	1	1
AC005034.3	161	118	183	107	113	137	143	93	104
AC005034.4	2	1	0	0	1	0	1	0	1
AC005034.5	12	9	6	4	2	4	11	8	10
AC005037.1	1	1	0	0	0	0	0	0	1
AC005037.2	0	0	0	0	0	0	0	0	0
AC005040.1	0	0	0	0	0	0	0	0	0
AC005041.1	1	0	0	0	1	0	0	0	0
AC005041.2	0	0	0	0	0	0	0	0	0
AC005041.3	0	0	0	0	0	0	0	1	0
AC005042.1	2	2	4	0	3	2	4	4	1
AC005042.2	0	0	0	0	0	0	0	0	0
AC005042.3	0	0	0	0	0	0	0	0	0
AC005046.1	4	3	4	2	9	7	6	4	1
AC005048.1	0	0	0	0	0	0	0	0	0
AC005050.1	0	0	0	0	0	0	0	0	0
AC005052.1	1	2	1	3	3	1	1	0	2
AC005062.1	39	7	22	14	8	16	30	19	17
AC005064.1	3	0	1	2	1	1	0	0	0
AC005066.1	0	0	0	0	0	0	0	0	0
AC005070.1	0	0	0	0	0	0	0	0	0
AC005070.2	0	1	0	1	0	0	0	0	0
AC005070.3	16	7	10	5	19	9	14	13	9
AC005071.1	0	0	1	1	0	1	0	0	0
AC005072.1	0	1	0	0	1	2	0	1	0
AC005076.1	26	16	25	24	17	18	16	17	16
AC005077.1	1	0	0	0	2	1	2	1	0
AC005077.2	4	4	2	3	2	3	8	6	6
AC005077.3	0	0	0	0	0	0	0	0	0
AC005077.4	19	20	44	11	21	27	33	8	17
AC005077.9	0	0	0	0	0	0	0	0	0
AC005082.1	0	3	2	1	2	0	1	1	2
AC005082.2	0	0	0	0	0	0	0	0	0
AC005083.1	39	19	36	25	18	13	24	14	16
AC005084.1	0	0	0	0	0	0	0	0	0
AC005086.1	1	0	0	0	0	0	0	0	0
AC005086.2	0	0	0	0	0	0	0	0	0
AC005086.3	1	0	0	0	0	1	1	0	0
AC005086.4	0	0	0	0	1	0	0	0	0
AC005088.1	0	0	0	0	0	0	0	0	0
AC005089.1	2	3	5	4	1	7	7	4	2
AC005090.1	0	0	0	0	0	0	0	0	0
AC005091.1	2	1	1	0	1	1	1	0	1
AC005094.1	0	0	0	1	0	0	0	0	0
AC005096.1	0	1	1	3	0	0	1	0	0
AC005099.1	1	0	0	0	2	0	1	0	0
AC005100.1	0	0	0	0	0	0	0	0	0
AC005102.1	2	0	1	0	0	3	0	0	0
AC005104.1	23	14	13	2	18	21	18	6	8
AC005104.2	1	0	0	0	0	1	1	0	0
AC005105.1	1	0	0	0	0	0	0	0	0
AC005144.1	0	0	0	0	0	0	0	0	0
AC005150.1	0	0	0	0	0	0	0	0	0
AC005154.1	0	1	0	0	0	0	3	0	0
AC005154.2	1	0	0	1	0	0	0	1	0
AC005154.3	0	0	0	0	0	0	0	0	0
AC005154.4	0	0	0	0	2	0	0	0	2
AC005154.5	0	0	0	0	0	0	0	0	0
AC005156.1	2	0	0	1	0	2	0	0	0
AC005159.1	0	0	0	1	0	0	0	0	1
AC005160.1	0	0	0	0	0	0	0	0	0
AC005161.1	0	0	0	0	0	0	0	0	0
AC005162.1	0	0	0	0	0	0	2	0	0
AC005162.2	0	1	0	0	0	0	0	0	0
AC005162.3	5	0	1	1	1	5	1	0	3
AC005165.1	1	2	1	1	0	2	0	0	2
AC005165.2	3	1	6	4	1	0	4	4	0
AC005176.1	0	0	0	0	0	0	0	0	0
AC005176.2	0	0	0	0	0	0	0	0	0
AC005178.1	0	0	0	0	0	0	0	0	0
AC005180.1	6	2	8	1	5	5	0	5	5
AC005180.2	10	3	6	2	8	5	2	0	2
AC005181.1	0	0	0	0	0	0	0	0	0
AC005183.1	1	0	3	1	0	0	0	0	0
AC005185.1	0	0	0	0	0	0	0	0	0
AC005186.1	0	0	0	0	0	0	0	0	0
AC005189.1	0	0	0	0	0	0	0	0	0
AC005191.1	0	0	0	0	0	0	0	0	0
AC005195.1	0	0	0	0	0	0	0	0	0
AC005197.1	6	1	3	2	6	3	5	1	1
AC005208.1	0	0	0	0	0	0	0	0	0
AC005209.1	0	0	0	0	0	0	0	0	0
AC005215.1	0	0	0	0	0	0	0	0	0
AC005220.1	0	1	2	1	0	0	0	0	1
AC005224.1	13	8	15	6	6	11	19	11	8
AC005224.2	0	0	0	0	1	1	1	1	0
AC005224.3	2	1	0	0	5	3	1	0	0
AC005225.1	1	0	1	1	0	2	3	0	0
AC005225.2	0	1	2	0	0	0	0	0	1
AC005225.3	0	0	0	0	0	0	0	0	0
AC005225.4	4	0	0	0	2	2	2	0	2
AC005229.1	11	4	14	9	5	3	6	6	6
AC005229.2	0	0	0	0	0	0	0	0	0
AC005229.3	0	0	0	0	0	0	0	0	0
AC005229.4	34	16	40	27	34	25	26	29	28
AC005230.1	0	0	0	0	1	0	0	0	0
AC005232.1	1	0	0	0	0	0	0	1	0
AC005234.1	0	1	1	0	1	0	0	0	0
AC005237.1	0	0	0	0	0	0	0	0	0
AC005237.2	0	0	0	0	0	1	1	0	0
AC005244.1	1	0	0	1	1	0	0	1	0
AC005244.2	0	0	0	0	0	0	0	0	0
AC005252.1	0	0	0	0	0	0	0	0	0
AC005252.2	0	0	0	0	0	0	0	0	0
AC005252.3	0	0	0	0	0	0	0	0	0
AC005253.1	14	18	16	11	16	17	18	11	10
AC005253.2	0	0	0	0	0	0	0	0	0
AC005255.1	0	0	0	0	0	0	0	0	0
AC005256.1	0	0	0	0	0	0	0	0	0
AC005258.1	0	0	0	0	0	0	0	0	0
AC005261.1	235	130	110	78	168	165	121	69	46
AC005261.2	1	3	5	9	5	2	9	2	4
AC005261.3	34	16	31	14	12	16	16	14	11
AC005261.4	4	6	4	2	4	2	3	4	0
AC005261.5	5	8	8	3	9	7	4	1	2
AC005262.1	1	0	0	0	0	0	0	0	0
AC005262.2	0	0	0	0	0	0	0	0	0
AC005264.1	0	0	1	0	0	0	0	0	0
AC005274.1	2	0	0	0	1	1	1	0	0
AC005277.1	0	0	0	0	0	0	0	0	0
AC005277.2	2	2	0	0	4	0	1	1	2
AC005280.1	0	0	0	0	0	0	0	0	0
AC005280.2	0	0	0	0	0	0	0	0	0
AC005280.3	0	0	0	0	0	0	0	0	0
AC005281.1	0	0	0	0	0	0	0	0	0
AC005284.1	0	0	0	0	0	0	0	0	0
AC005288.1	180	126	225	132	105	163	145	91	121
AC005291.1	0	0	0	0	1	0	0	0	0
AC005291.2	0	0	0	0	0	0	0	0	0
AC005293.1	0	0	0	0	0	0	1	0	0
AC005294.1	0	0	0	0	0	0	0	0	0
AC005296.1	0	0	0	0	0	0	0	0	0
AC005297.1	0	0	0	0	0	0	0	0	0
AC005297.2	0	0	0	0	0	0	0	0	0
AC005297.3	0	0	0	0	0	0	0	0	0
AC005300.1	0	0	0	0	2	0	1	0	0
AC005301.1	0	0	0	0	0	0	0	0	0
AC005303.1	0	0	0	0	0	0	0	0	0
AC005304.1	0	0	0	0	0	0	0	0	0
AC005304.2	0	0	0	0	0	0	0	0	0
AC005304.3	0	0	0	0	0	0	0	0	0
AC005306.1	0	1	0	0	0	0	0	0	0
AC005307.1	31	13	23	6	13	15	15	10	10
AC005323.1	0	0	0	0	0	0	0	0	0
AC005323.2	0	0	0	0	0	0	0	0	0
AC005324.1	0	0	0	0	0	0	0	0	0
AC005324.2	0	0	0	0	0	0	0	0	0
AC005324.3	0	0	0	0	1	1	0	0	0
AC005324.4	0	0	0	0	0	0	0	0	0
AC005324.5	1	0	0	1	2	1	0	0	1
AC005324.6	0	0	0	0	0	0	0	0	0
AC005326.1	3	16	7	2	8	9	13	11	8
AC005329.1	2	1	0	1	1	2	1	0	1
AC005329.2	0	0	0	0	0	0	0	0	0
AC005329.3	1	0	0	3	0	0	3	1	0
AC005330.1	6	4	7	3	3	2	4	3	4
AC005332.1	6	1	1	2	5	3	0	4	1
AC005332.2	0	1	0	0	0	0	0	0	0
AC005332.3	3	1	3	3	5	4	2	1	2
AC005332.4	34	16	46	25	19	23	37	20	16
AC005332.5	4	6	9	5	4	4	3	2	3
AC005332.6	45	19	54	34	31	45	49	31	39
AC005332.7	0	0	1	0	0	1	0	0	2
AC005336.1	0	0	1	1	0	0	2	1	0
AC005336.2	6	6	7	6	2	4	4	2	2
AC005336.3	0	0	0	0	0	0	0	0	0
AC005339.1	0	0	0	0	0	0	0	0	0
AC005341.1	0	1	0	0	1	1	0	0	0
AC005342.1	1	0	2	0	0	0	0	1	1
AC005342.2	0	0	0	0	0	0	0	0	0
AC005343.1	2	5	2	1	5	4	0	1	0
AC005344.1	0	0	0	0	0	0	0	0	0
AC005345.1	0	0	0	0	0	0	0	0	0
AC005351.1	0	0	0	0	2	0	0	0	1
AC005355.1	4	5	5	4	9	3	8	4	7
AC005357.1	0	0	0	0	0	0	0	0	0
AC005357.2	1	0	0	0	0	0	0	0	0
AC005358.1	0	0	1	0	0	0	0	0	0
AC005358.2	0	0	0	0	0	0	2	1	0
AC005363.1	0	0	0	0	0	0	0	0	0
AC005363.2	0	1	0	0	3	0	1	2	0
AC005370.1	0	0	0	0	0	0	0	0	0
AC005375.1	0	0	0	0	0	0	0	0	0
AC005377.1	0	0	0	0	0	0	0	0	0
AC005379.1	0	1	0	0	0	1	1	0	0
AC005381.1	0	0	1	0	0	1	1	1	0
AC005383.1	0	0	0	1	0	0	0	0	1
AC005387.1	3	1	4	2	1	3	8	3	5
AC005387.2	1	5	1	5	5	3	5	3	5
AC005391.1	0	1	1	0	0	1	0	0	0
AC005392.1	0	0	0	0	0	0	0	0	0
AC005392.2	0	0	0	1	1	0	0	1	0
AC005392.3	0	0	0	0	0	0	0	0	0
AC005393.1	2	0	3	1	1	1	5	1	1
AC005394.1	0	0	0	1	0	0	0	0	0
AC005394.2	5	3	7	2	3	3	10	5	4
AC005399.1	0	0	0	0	0	0	0	0	0
AC005410.1	0	0	1	1	0	4	0	0	0
AC005410.2	0	0	1	0	0	0	0	0	1
AC005412.1	0	0	0	0	0	0	0	0	0
AC005414.1	2	0	0	0	1	1	0	1	1
AC005476.1	4	1	5	1	5	7	6	3	1
AC005476.2	5	1	3	4	5	2	2	4	1
AC005477.1	0	0	0	0	0	0	0	0	0
AC005479.1	2	3	2	1	1	1	4	1	0
AC005479.2	0	0	0	3	0	4	3	0	1
AC005480.1	0	1	0	0	0	0	1	1	0
AC005480.2	0	0	0	0	0	0	0	0	0
AC005481.1	0	1	1	0	2	0	1	3	0
AC005482.1	0	0	0	0	0	0	0	0	0
AC005486.1	0	0	0	0	0	0	0	0	0
AC005487.1	0	0	0	0	0	0	0	0	0
AC005488.1	0	0	0	0	0	0	0	0	0
AC005493.1	0	0	0	0	0	0	0	0	0
AC005495.1	0	0	0	1	0	0	0	0	0
AC005498.1	0	0	0	0	0	0	0	0	0
AC005498.2	0	1	2	1	0	0	1	0	0
AC005498.3	6	2	1	8	3	9	2	5	2
AC005513.1	0	0	0	0	0	0	0	0	0
AC005514.1	0	0	0	0	0	0	0	0	0
AC005515.1	0	0	0	0	0	0	0	0	0
AC005518.1	0	0	0	0	0	0	0	0	0
AC005518.2	0	0	0	0	0	0	0	0	0
AC005519.1	48	51	44	21	57	67	88	37	49
AC005520.1	0	0	0	0	0	0	0	0	0
AC005520.2	0	0	0	0	0	1	0	0	0
AC005520.3	1	0	0	0	0	0	0	0	1
AC005520.4	0	0	0	0	0	0	0	0	0
AC005520.5	3	1	1	1	3	1	2	1	1
AC005521.1	0	0	0	0	0	0	0	0	0
AC005522.1	1	0	0	0	0	0	0	0	0
AC005523.1	0	0	1	0	1	1	0	0	0
AC005523.2	0	0	0	0	0	0	0	0	0
AC005524.1	5	3	6	1	0	2	11	5	2
AC005529.1	0	1	0	1	0	0	1	0	0
AC005531.1	1	0	3	0	0	0	0	0	0
AC005532.1	2	0	0	3	1	2	1	0	1
AC005532.2	0	0	0	0	0	1	0	0	0
AC005534.1	0	0	2	0	2	2	0	0	1
AC005534.2	2	0	1	1	0	0	1	1	3
AC005537.1	2	0	1	1	1	1	1	2	1
AC005538.1	0	0	0	0	0	0	0	0	0
AC005538.2	0	0	0	0	0	0	0	0	0
AC005539.1	1	0	0	0	0	0	0	0	0
AC005540.1	1	0	0	0	1	0	0	0	0
AC005544.1	0	0	2	1	0	1	0	0	1
AC005544.2	0	0	0	0	0	0	0	0	0
AC005546.1	4	2	5	0	0	3	2	1	0
AC005548.1	0	0	0	0	0	0	0	0	1
AC005549.1	0	0	0	0	0	0	0	0	0
AC005549.2	0	0	0	0	0	0	0	0	0
AC005549.3	0	0	0	0	0	0	0	0	0
AC005550.1	0	0	0	0	0	0	1	0	0
AC005550.2	0	0	0	0	0	0	0	0	0
AC005551.1	0	0	0	0	0	0	0	0	0
AC005552.1	0	0	0	0	0	0	0	0	0
AC005559.1	0	0	0	0	0	0	0	0	0
AC005578.1	2	0	1	0	0	0	0	0	1
AC005580.1	0	0	0	1	0	0	0	0	0
AC005586.1	10	5	13	9	14	8	10	7	10
AC005586.2	2	2	1	4	2	3	3	1	1
AC005587.1	0	0	0	0	0	0	0	0	0
AC005588.1	0	0	0	0	0	0	0	0	0
AC005592.1	16	17	30	22	53	99	70	29	23
AC005593.1	0	0	1	1	0	1	0	0	0
AC005597.1	0	0	0	0	0	0	0	0	0
AC005606.1	0	0	0	0	0	0	0	0	0
AC005606.2	0	0	0	0	0	0	1	0	0
AC005609.1	0	0	0	0	0	0	0	0	0
AC005609.3	0	0	0	0	0	0	0	0	0
AC005609.4	0	0	0	0	0	0	0	0	0
AC005609.5	1	0	0	0	0	0	1	0	0
AC005614.1	0	0	0	0	1	0	0	0	0
AC005614.2	0	0	0	0	0	0	0	0	0
AC005616.1	0	0	0	0	0	0	0	0	0
AC005618.1	20	2	9	10	14	21	15	13	15
AC005618.2	0	0	0	0	0	0	0	0	0
AC005618.3	0	0	0	0	0	0	0	0	0
AC005621.1	0	0	0	0	0	0	0	0	0
AC005622.1	0	0	0	0	0	1	0	0	1
AC005625.1	0	0	0	0	0	0	1	0	0
AC005631.1	0	0	0	0	0	0	0	0	0
AC005632.1	0	0	0	0	0	0	0	0	0
AC005632.2	2	2	2	6	4	2	5	5	1
AC005632.3	0	0	0	0	0	0	0	0	0
AC005632.4	0	0	0	1	0	0	0	0	0
AC005670.1	0	3	2	3	0	4	2	0	3
AC005670.2	0	0	0	0	0	0	0	0	0
AC005674.1	0	0	0	0	0	0	0	0	0
AC005674.2	160	76	134	75	134	139	126	97	94
AC005682.1	1	3	5	0	4	1	4	0	1
AC005686.1	0	0	0	0	0	0	0	0	0
AC005691.1	0	0	0	0	0	0	0	0	0
AC005692.1	0	0	0	0	0	0	0	0	0
AC005692.2	0	0	0	0	1	0	0	0	0
AC005692.3	0	1	0	1	0	0	0	0	0
AC005695.1	2	3	4	1	4	3	3	1	1
AC005695.2	0	0	0	0	0	0	0	0	0
AC005695.3	0	0	0	0	0	0	0	0	1
AC005696.1	0	0	1	1	1	3	1	0	1
AC005696.2	0	0	0	0	0	0	0	0	0
AC005696.3	0	1	1	0	0	0	0	0	1
AC005696.4	51	33	77	53	84	78	124	66	49
AC005697.1	0	0	0	0	0	0	0	0	0
AC005697.2	0	2	0	0	0	0	1	1	0
AC005699.1	2	0	0	0	0	0	0	0	0
AC005701.1	0	0	0	0	0	0	0	0	0
AC005702.1	2	3	1	5	4	1	3	0	5
AC005702.2	0	2	0	0	0	0	0	0	0
AC005702.3	2	1	5	2	2	1	1	5	2
AC005702.4	6	3	7	3	4	4	7	2	2
AC005703.1	0	0	0	0	0	0	0	0	0
AC005703.2	0	0	0	0	0	0	0	0	0
AC005703.3	0	0	0	0	0	0	0	0	0
AC005703.4	0	0	0	0	0	0	1	0	0
AC005703.5	0	0	0	0	0	0	0	0	0
AC005703.6	0	0	0	0	0	0	0	0	0
AC005722.1	0	0	0	0	0	0	0	0	0
AC005722.2	1	0	1	0	0	0	0	0	0
AC005722.3	0	0	0	0	0	0	0	0	0
AC005725.1	4	1	1	4	2	2	2	1	1
AC005726.1	40	36	46	29	33	54	46	33	28
AC005726.2	3	1	0	1	1	4	1	3	1
AC005726.3	30	14	23	12	26	21	22	15	14
AC005726.4	0	0	0	0	0	0	0	0	0
AC005726.5	0	0	0	0	0	0	0	0	0
AC005730.1	0	0	0	0	0	0	0	0	0
AC005730.2	1	0	5	2	1	1	0	0	0
AC005730.3	1	0	0	0	0	1	0	1	0
AC005736.1	7	4	1	2	2	0	3	2	3
AC005736.2	0	0	0	0	0	0	0	0	0
AC005740.1	2	1	3	2	1	1	0	0	1
AC005740.2	0	0	0	1	0	0	0	0	0
AC005740.3	1	0	0	0	0	1	1	0	0
AC005740.4	1	0	1	1	0	1	0	0	0
AC005741.1	0	0	0	0	0	0	0	0	0
AC005746.1	3	0	0	0	1	3	3	1	1
AC005746.2	0	0	0	0	0	0	0	0	0
AC005746.3	0	0	0	0	1	0	0	0	1
AC005753.1	5	0	1	1	2	4	2	1	0
AC005757.1	0	0	0	0	0	2	0	0	0
AC005758.1	0	0	0	0	0	0	0	0	0
AC005759.1	2	3	1	1	2	1	3	0	1
AC005771.1	0	0	0	0	0	0	0	0	0
AC005772.1	1	0	0	0	0	0	0	0	1
AC005774.1	0	0	0	0	0	0	0	0	0
AC005775.1	1	2	3	1	2	1	1	0	1
AC005776.1	2	2	3	0	7	2	1	4	1
AC005776.2	9	5	7	7	12	14	8	8	6
AC005777.1	0	0	0	0	0	0	0	0	0
AC005779.1	0	0	0	0	0	0	0	0	1
AC005779.2	0	0	0	0	0	0	0	0	0
AC005783.1	0	0	0	0	0	0	0	0	0
AC005785.1	13	6	15	4	21	22	5	3	1
AC005786.1	1	0	1	0	0	0	1	0	0
AC005786.2	0	0	0	0	0	0	0	0	0
AC005786.3	0	0	0	0	0	0	0	0	0
AC005786.4	1	2	0	0	0	1	2	1	0
AC005789.1	0	0	0	0	0	0	0	0	0
AC005790.1	2	0	2	1	0	1	1	2	0
AC005796.1	0	1	0	0	0	0	0	0	0
AC005798.1	0	0	0	0	0	1	0	0	0
AC005808.1	2	0	0	0	0	0	0	0	0
AC005821.1	0	0	2	0	0	0	2	1	0
AC005822.1	18	11	18	7	15	18	15	12	10
AC005823.1	0	0	0	0	0	0	0	0	0
AC005823.2	0	0	0	0	0	0	0	0	0
AC005828.1	0	0	0	2	0	0	0	0	0
AC005828.2	0	0	0	0	0	0	0	0	0
AC005828.3	0	0	0	0	0	0	0	0	0
AC005828.4	1	0	0	0	1	0	0	0	0
AC005828.5	0	0	0	0	0	0	0	0	0
AC005828.6	0	0	0	0	0	0	0	0	0
AC005828.7	0	0	0	0	0	0	0	0	0
AC005829.1	0	0	1	0	0	0	0	0	0
AC005829.2	0	0	1	0	0	0	0	0	0
AC005831.1	0	1	2	1	1	1	1	0	0
AC005832.1	2	1	0	0	0	0	0	0	0
AC005832.2	3	1	0	2	1	0	0	1	0
AC005832.3	0	1	1	2	2	0	1	2	0
AC005832.4	0	0	0	0	0	0	0	0	0
AC005833.1	23	26	21	21	29	26	27	17	19
AC005833.2	0	0	0	0	0	0	0	0	0
AC005837.1	7	3	6	4	2	5	4	3	2
AC005837.2	0	0	0	0	0	0	0	0	0
AC005837.3	0	0	0	1	1	0	0	0	0
AC005838.1	0	0	0	0	0	0	0	0	0
AC005838.2	5	2	3	4	3	4	6	3	3
AC005839.1	79	55	66	41	53	81	62	37	21
AC005840.1	1	0	1	1	0	1	0	1	0
AC005840.2	1	0	1	0	0	3	0	0	1
AC005840.3	1	1	4	6	1	5	1	1	2
AC005840.4	1	3	5	0	0	3	3	0	1
AC005841.1	0	0	0	0	0	0	0	0	0
AC005842.1	3	2	3	2	1	3	3	1	0
AC005845.1	0	0	0	0	0	0	0	0	0
AC005856.1	0	0	0	0	0	0	0	0	1
AC005858.1	0	0	0	0	0	0	0	0	0
AC005858.2	0	0	0	0	0	0	0	0	0
AC005858.3	0	0	0	0	0	0	0	0	0
AC005863.1	1	0	1	1	0	0	2	0	0
AC005865.1	0	2	1	1	1	3	1	1	1
AC005865.2	6	4	3	4	2	5	5	4	3
AC005868.1	0	0	0	0	0	0	0	0	0
AC005871.1	0	0	0	0	0	0	0	0	0
AC005871.2	0	0	0	0	0	0	0	0	0
AC005884.1	0	0	0	0	0	0	0	0	0
AC005884.2	0	0	0	0	0	0	0	1	0
AC005899.1	0	0	0	0	0	1	0	0	0
AC005899.2	0	0	0	0	0	0	0	0	0
AC005899.3	0	0	0	0	0	0	0	0	0
AC005899.4	0	0	0	0	0	0	0	0	0
AC005899.5	1	0	0	0	0	0	0	0	0
AC005899.6	3	0	0	0	1	1	0	0	0
AC005899.7	1	1	0	0	0	0	0	0	0
AC005899.8	1	0	3	1	1	1	3	1	0
AC005901.1	0	0	0	0	0	0	0	0	0
AC005906.1	0	0	0	0	0	1	0	0	0
AC005906.2	2	1	3	7	2	0	7	4	2
AC005906.3	0	0	0	0	0	0	0	0	0
AC005908.1	1	0	0	0	0	0	1	0	0
AC005908.2	0	0	0	0	0	1	0	0	0
AC005909.1	0	0	0	0	0	0	0	0	0
AC005911.1	3	4	5	5	4	8	4	3	1
AC005912.1	856	411	995	733	510	604	690	408	512
AC005912.2	0	0	0	0	0	0	0	0	0
AC005915.1	0	0	0	0	0	0	0	0	0
AC005920.1	0	0	0	0	0	0	0	0	0
AC005920.2	0	0	0	0	0	0	0	0	0
AC005920.3	0	0	0	0	0	0	0	0	0
AC005920.4	0	0	0	0	0	0	0	0	0
AC005921.1	0	0	0	0	0	0	0	0	0
AC005921.2	0	0	0	0	0	0	0	0	0
AC005921.3	2	1	2	1	0	2	2	1	0
AC005921.4	0	0	0	0	0	0	0	0	0
AC005926.1	0	0	0	0	0	0	0	0	0
AC005943.1	0	0	0	0	0	0	0	0	0
AC005943.2	0	0	0	0	0	0	0	0	0
AC005944.1	0	0	0	0	0	0	0	0	0
AC005951.1	0	0	0	0	0	0	0	0	0
AC005954.1	0	0	0	0	1	1	4	2	1
AC005954.2	0	1	0	1	0	0	0	0	1
AC005962.1	3	0	0	2	0	0	1	0	3
AC005972.1	0	0	0	0	0	0	0	0	0
AC005972.2	0	0	0	0	1	0	0	0	0
AC005972.3	1	0	1	1	1	1	0	0	0
AC005993.1	2	2	2	2	1	2	1	1	2
AC005996.1	0	2	0	0	0	0	0	0	0
AC005999.1	0	0	0	0	0	0	0	0	0
AC005999.2	0	0	0	0	0	0	0	0	0
AC006001.1	0	0	0	0	0	0	1	0	0
AC006001.2	12	10	15	10	6	5	19	8	3
AC006001.3	224	140	258	165	152	176	250	169	146
AC006001.4	0	0	0	0	0	0	0	0	0
AC006003.1	0	0	0	0	0	0	0	0	0
AC006004.1	0	0	0	0	0	0	0	0	0
AC006006.1	0	0	0	0	0	0	0	0	0
AC006007.1	0	0	0	0	0	0	0	0	0
AC006011.1	0	0	0	0	0	0	0	0	0
AC006011.2	2	2	2	3	0	3	3	1	1
AC006012.1	0	1	1	0	0	0	2	0	0
AC006013.1	0	0	0	0	0	0	0	0	0
AC006014.1	0	1	0	0	0	0	1	0	0
AC006014.10	0	0	0	0	0	0	0	0	0
AC006015.1	0	0	0	0	0	0	0	0	0
AC006017.1	0	0	1	2	1	4	0	1	0
AC006019.1	0	0	0	0	0	0	1	0	0
AC006019.2	0	0	0	0	0	0	0	0	0
AC006019.3	0	0	0	0	0	0	0	0	0
AC006020.1	9	0	5	0	3	6	4	3	2
AC006022.1	0	0	0	0	0	0	0	0	0
AC006023.1	0	0	0	0	0	0	0	0	0
AC006023.2	0	0	0	0	0	0	0	0	1
AC006026.1	2	0	3	0	1	2	1	0	1
AC006026.2	0	0	0	0	0	0	0	0	0
AC006026.3	2	0	0	0	0	0	3	0	0
AC006027.1	0	0	0	0	0	0	0	0	0
AC006028.1	1	1	0	0	0	0	0	0	0
AC006030.1	2	0	0	0	0	1	0	1	1
AC006033.1	0	0	0	0	1	0	0	0	0
AC006033.2	4	1	3	0	2	1	0	1	2
AC006035.1	0	0	0	0	0	0	0	0	0
AC006037.1	0	0	0	0	0	0	0	0	0
AC006041.1	0	0	0	0	0	0	0	0	0
AC006042.1	18	6	5	2	7	9	9	4	8
AC006042.2	0	0	1	1	1	0	0	3	0
AC006042.3	5	2	2	4	5	1	1	1	1
AC006042.4	1	0	1	1	0	2	1	1	1
AC006043.1	0	0	0	0	0	0	0	0	0
AC006055.1	0	0	0	0	0	0	0	0	0
AC006058.1	65	66	96	120	126	171	215	106	65
AC006058.2	1	0	0	0	2	1	0	0	0
AC006058.3	3	0	3	4	2	2	4	0	1
AC006058.4	21	16	35	28	40	77	98	42	27
AC006059.1	3	3	3	11	2	11	10	3	10
AC006059.2	0	2	0	0	1	2	0	2	0
AC006059.3	0	0	0	0	0	0	0	0	0
AC006063.1	0	0	0	0	0	0	0	0	0
AC006063.2	0	0	0	0	0	0	0	0	0
AC006064.1	0	0	2	0	0	2	4	0	0
AC006064.2	8	1	3	0	5	7	4	2	3
AC006064.3	3	0	2	1	3	1	4	2	4
AC006064.4	0	0	0	0	0	0	0	0	0
AC006064.5	7	1	2	1	1	2	2	0	1
AC006064.6	0	0	0	0	0	0	0	0	0
AC006065.1	0	0	0	0	0	0	0	0	0
AC006065.2	0	0	0	0	0	0	0	0	0
AC006065.3	0	0	0	0	0	0	0	0	0
AC006065.4	0	0	0	0	0	0	0	0	0
AC006065.5	0	0	0	0	0	0	0	0	0
AC006065.6	0	0	0	0	0	0	0	0	0
AC006076.1	0	0	0	0	0	0	0	0	0
AC006077.1	1	0	0	0	0	1	0	0	0
AC006077.2	8	4	3	2	6	1	10	3	5
AC006080.1	0	0	0	0	0	0	0	0	0
AC006111.1	2	7	8	1	4	2	2	0	0
AC006111.2	20	12	10	7	5	12	11	9	4
AC006111.3	0	0	0	0	1	0	1	0	0
AC006115.1	0	0	0	0	0	0	1	0	0
AC006115.2	0	0	0	0	0	0	0	0	0
AC006115.3	0	0	0	0	0	0	0	0	0
AC006116.1	2	1	6	1	4	1	4	1	4
AC006116.10	2	2	5	1	3	4	5	5	5
AC006116.2	1	2	0	0	0	0	2	0	0
AC006116.3	0	0	0	0	0	0	0	0	0
AC006116.4	4	5	4	3	4	3	3	2	4
AC006116.5	0	1	0	0	0	0	1	0	0
AC006116.6	4	1	6	1	0	2	1	1	0
AC006116.7	0	0	0	0	0	0	0	0	0
AC006116.8	0	4	2	0	0	1	0	0	3
AC006116.9	1	0	0	1	2	2	1	1	2
AC006122.1	0	1	2	1	3	2	3	0	1
AC006128.1	9	9	22	7	22	22	54	19	16
AC006130.1	0	0	0	0	0	0	1	0	0
AC006130.2	0	0	0	0	0	0	0	0	0
AC006133.1	0	0	0	0	0	0	0	0	0
AC006141.1	18	8	16	5	29	27	6	8	7
AC006144.1	0	0	0	0	0	0	0	0	0
AC006145.1	2	0	2	0	3	0	0	0	1
AC006146.1	0	0	0	0	0	0	0	0	0
AC006148.1	0	0	0	0	0	0	0	1	1
AC006148.2	1	0	0	0	0	0	0	0	0
AC006150.1	0	0	0	0	0	0	0	0	0
AC006150.2	0	0	0	0	0	0	0	0	0
AC006153.1	0	0	0	0	0	0	0	0	0
AC006157.1	0	0	0	0	0	0	0	0	0
AC006158.1	0	0	0	0	0	0	0	0	0
AC006159.1	0	0	0	0	0	0	0	0	0
AC006159.2	0	0	0	0	0	0	0	0	0
AC006160.1	0	1	3	2	0	1	2	0	2
AC006160.2	0	0	0	0	0	0	0	0	0
AC006195.1	0	0	0	0	0	0	0	2	1
AC006197.1	0	0	0	0	0	0	0	0	0
AC006199.1	2	0	1	0	0	0	1	0	0
AC006205.1	0	0	0	0	0	0	0	0	0
AC006205.2	0	0	0	0	0	0	0	0	0
AC006206.1	1	0	1	0	1	4	0	0	1
AC006206.2	6	0	2	2	2	1	4	1	2
AC006207.1	0	0	0	0	0	0	0	0	0
AC006210.1	0	0	0	0	0	0	0	0	0
AC006210.2	1	2	1	8	1	0	0	3	4
AC006213.1	4	1	2	2	1	5	4	2	6
AC006213.2	16	9	7	11	3	8	17	6	11
AC006213.3	3	3	2	0	5	1	7	4	4
AC006213.4	5	9	7	4	7	12	10	4	1
AC006213.5	0	0	0	0	2	1	1	0	1
AC006213.6	9	7	11	6	15	16	8	3	5
AC006236.1	0	0	0	0	0	0	0	0	0
AC006237.1	0	1	0	0	1	1	0	0	0
AC006238.1	0	0	0	0	0	0	0	0	0
AC006238.2	0	0	1	0	0	1	0	0	0
AC006249.1	0	1	0	0	1	0	0	0	0
AC006252.1	0	1	8	2	3	4	8	2	4
AC006254.1	11	9	8	9	14	10	10	13	8
AC006254.2	0	3	2	2	1	5	1	1	2
AC006254.3	1	1	0	1	0	1	0	1	0
AC006262.1	0	0	0	0	0	0	0	0	0
AC006262.2	0	0	1	1	0	0	0	0	0
AC006262.3	0	0	0	0	0	0	0	0	0
AC006270.1	0	0	0	0	0	0	0	0	0
AC006270.2	0	0	0	0	0	0	0	0	0
AC006270.3	0	0	0	0	0	0	0	0	0
AC006272.1	1	0	0	0	0	2	0	0	0
AC006272.2	0	0	0	0	0	0	0	0	0
AC006273.1	2	1	1	1	0	0	4	1	0
AC006277.1	15	11	23	14	8	12	11	14	13
AC006288.1	0	0	0	0	0	0	0	0	0
AC006296.1	0	0	0	0	0	0	0	0	0
AC006296.2	0	0	0	0	0	0	0	0	0
AC006299.1	0	0	0	0	0	0	0	0	0
AC006305.1	24	7	10	12	11	12	20	7	11
AC006305.2	0	0	0	0	0	0	0	0	0
AC006305.3	0	0	0	0	0	0	0	0	0
AC006322.1	0	0	0	0	0	0	0	0	0
AC006326.1	0	0	0	0	0	0	0	0	0
AC006328.1	0	0	0	0	0	0	1	0	0
AC006328.2	0	0	0	0	0	0	0	0	0
AC006329.1	641	292	642	316	292	304	335	280	401
AC006329.2	4	1	0	1	0	1	1	2	0
AC006330.1	10	10	12	3	6	7	5	7	4
AC006333.1	0	0	0	0	0	0	0	0	0
AC006333.2	49	38	76	35	33	40	55	51	51
AC006335.1	0	0	0	0	0	0	0	0	0
AC006335.2	0	0	0	0	0	0	0	0	0
AC006335.3	0	0	0	0	0	0	0	0	0
AC006338.1	0	0	0	0	0	0	0	0	0
AC006338.2	0	0	0	0	0	0	0	0	0
AC006349.1	0	0	0	0	0	0	0	0	0
AC006355.1	0	0	0	0	0	0	0	0	0
AC006355.2	0	0	0	0	0	0	0	0	0
AC006357.1	0	0	0	0	0	0	0	0	0
AC006362.1	0	0	0	0	0	0	0	0	0
AC006363.1	0	0	0	0	0	0	0	0	0
AC006366.1	0	0	0	0	0	0	0	0	0
AC006369.1	0	0	0	0	0	0	0	0	0
AC006369.2	0	0	0	0	0	0	0	0	0
AC006371.1	0	0	0	0	0	0	0	0	0
AC006372.1	0	0	0	0	0	1	1	0	0
AC006372.2	0	1	1	0	0	1	0	2	0
AC006372.3	0	0	2	1	1	0	0	0	0
AC006377.1	0	0	0	0	0	0	0	0	0
AC006378.1	3	3	1	2	0	1	4	1	1
AC006380.1	0	0	0	0	0	0	0	0	0
AC006386.1	0	0	0	0	0	0	0	0	0
AC006386.2	0	0	0	0	0	0	0	0	0
AC006387.1	2	1	1	1	6	1	0	1	1
AC006390.1	0	0	0	0	0	0	0	0	0
AC006427.1	0	0	0	0	0	0	0	0	0
AC006432.1	0	0	0	0	0	0	0	0	0
AC006435.1	0	0	0	0	0	0	0	0	0
AC006435.2	11	14	10	9	25	34	31	11	8
AC006435.3	0	0	0	0	0	0	0	0	0
AC006435.4	0	0	0	0	0	0	0	0	0
AC006435.5	0	0	0	0	0	0	0	0	0
AC006441.1	1	4	2	0	3	5	2	0	2
AC006441.2	0	0	0	0	0	0	0	0	0
AC006441.3	0	0	0	0	0	0	0	0	0
AC006441.4	0	0	0	0	0	0	0	0	0
AC006441.5	0	0	0	0	0	0	0	0	0
AC006445.1	0	0	0	0	0	0	0	0	0
AC006445.2	0	0	1	0	1	0	0	2	0
AC006449.1	0	0	0	0	0	0	0	0	0
AC006449.2	0	0	0	0	0	2	1	0	0
AC006449.3	0	0	1	0	0	0	0	0	0
AC006449.5	5	4	10	5	1	10	8	4	2
AC006449.6	1	0	2	0	1	1	0	0	1
AC006449.7	0	0	0	0	0	0	0	0	0
AC006450.1	0	0	0	0	0	0	0	0	0
AC006450.2	0	0	0	0	0	0	0	0	0
AC006450.3	0	0	0	0	0	0	0	0	0
AC006452.1	0	1	0	0	0	1	3	1	1
AC006453.1	0	0	0	0	0	0	0	0	0
AC006453.2	0	0	0	1	1	0	5	1	1
AC006453.3	0	0	0	0	0	0	0	0	0
AC006453.4	0	0	0	0	0	0	0	0	0
AC006455.1	0	0	0	0	0	0	0	0	0
AC006455.2	0	0	0	0	0	0	0	0	0
AC006455.3	0	0	0	0	0	0	0	0	0
AC006455.4	0	0	0	0	0	0	0	0	0
AC006455.5	0	0	0	0	0	0	0	0	0
AC006455.6	0	0	0	0	0	0	0	0	0
AC006455.7	0	0	0	0	0	0	0	0	0
AC006455.8	0	0	0	0	0	0	0	0	0
AC006457.1	0	0	0	0	0	0	0	0	0
AC006458.1	0	0	0	0	0	0	0	0	0
AC006460.1	1	0	0	0	0	3	1	0	0
AC006461.1	0	0	0	0	0	0	0	0	0
AC006463.1	0	0	0	0	0	0	0	0	0
AC006466.1	0	0	0	0	0	0	0	0	0
AC006480.1	0	0	0	0	0	0	0	0	0
AC006480.2	1	5	1	3	1	2	10	4	1
AC006482.1	0	0	0	0	0	0	0	0	0
AC006483.1	2	1	0	0	1	1	0	1	1
AC006483.2	0	1	1	0	0	0	3	0	0
AC006484.1	0	0	0	0	0	0	0	0	0
AC006486.1	0	0	0	0	0	0	0	0	0
AC006486.2	0	0	0	0	0	0	0	0	0
AC006487.1	0	2	1	0	1	2	0	0	0
AC006487.2	0	0	0	0	0	1	0	0	0
AC006499.1	0	0	0	0	0	0	0	0	0
AC006499.2	0	0	0	0	0	0	0	0	0
AC006499.3	0	0	0	0	0	0	0	0	0
AC006499.4	0	0	0	0	0	0	0	0	0
AC006499.5	0	0	0	0	0	0	0	0	0
AC006499.6	0	0	0	0	0	0	0	0	0
AC006499.7	0	0	0	0	0	0	0	0	0
AC006499.8	0	0	0	0	0	0	0	0	0
AC006504.1	17	13	7	5	4	6	8	8	9
AC006504.2	0	0	0	0	0	0	0	0	0
AC006504.3	1	1	4	1	0	1	3	2	1
AC006504.4	0	0	0	0	0	0	0	0	0
AC006504.5	75	37	75	47	37	52	53	38	45
AC006504.6	0	0	0	0	0	0	0	0	0
AC006504.7	0	0	0	0	0	0	0	0	0
AC006504.8	20	10	18	13	10	14	14	6	16
AC006509.1	3	0	3	2	2	3	1	0	2
AC006509.2	0	0	1	0	0	0	1	0	0
AC006511.1	0	0	1	0	0	0	0	0	0
AC006511.2	1	3	2	1	3	0	2	0	1
AC006511.3	24	8	27	12	21	8	11	15	14
AC006511.4	1	0	2	4	0	0	1	2	0
AC006511.5	1	1	0	1	0	0	2	0	1
AC006512.1	0	0	0	0	0	0	0	0	0
AC006512.2	0	0	0	0	0	0	0	0	0
AC006517.1	0	0	0	0	1	0	0	0	0
AC006518.1	1	0	0	0	0	0	0	1	1
AC006518.2	2	0	0	0	1	2	2	1	1
AC006529.1	0	0	0	0	0	0	0	0	0
AC006530.1	0	0	0	0	0	0	0	0	0
AC006534.1	0	0	0	0	0	0	0	0	0
AC006534.2	0	0	0	0	0	0	0	0	0
AC006538.1	13	9	8	8	10	15	9	1	3
AC006538.2	0	0	0	0	0	0	0	0	0
AC006538.3	2	0	0	0	0	1	0	0	0
AC006539.1	3	2	5	0	2	1	4	1	1
AC006539.2	5	4	7	4	1	3	4	3	7
AC006547.1	13	11	14	19	12	15	6	10	4
AC006547.2	0	0	0	0	0	0	0	0	0
AC006547.3	0	0	0	0	0	0	0	0	0
AC006548.1	0	0	0	0	0	0	0	0	0
AC006548.2	0	0	0	0	0	0	0	0	0
AC006548.3	1	0	0	0	0	2	1	0	0
AC006557.1	23	20	26	8	18	20	18	13	6
AC006557.2	0	0	0	0	0	0	0	0	0
AC006557.3	0	0	0	0	0	0	0	0	0
AC006557.4	0	0	0	0	0	0	0	0	0
AC006557.5	4	2	2	1	3	2	0	0	2
AC006557.6	0	0	0	0	0	0	0	0	0
AC006566.1	0	0	0	0	0	0	0	0	0
AC006581.1	0	0	0	0	0	1	0	0	0
AC006581.2	19	9	22	14	12	12	15	9	18
AC006600.1	0	0	0	0	0	0	0	0	0
AC006600.2	0	0	0	0	0	0	0	0	0
AC006840.1	0	0	0	0	0	0	0	0	0
AC006924.1	0	0	0	0	0	0	0	0	0
AC006926.1	0	0	0	0	0	0	0	0	0
AC006927.1	2	0	0	2	0	1	0	0	0
AC006927.2	0	0	0	0	0	0	0	0	0
AC006927.3	1	0	0	0	0	0	0	0	0
AC006927.4	0	0	0	0	0	0	0	0	0
AC006927.5	0	0	0	0	0	0	0	0	0
AC006942.1	2	2	1	0	1	2	1	0	4
AC006946.1	0	1	1	1	1	1	1	1	1
AC006946.2	0	0	0	1	0	0	0	0	0
AC006946.3	0	0	0	0	0	0	0	0	0
AC006947.1	0	0	0	0	0	0	0	0	0
AC006953.1	0	0	0	0	0	1	1	0	0
AC006960.1	0	0	1	0	0	0	0	1	0
AC006960.2	0	0	0	0	0	0	0	0	0
AC006960.3	0	0	1	0	0	0	0	1	1
AC006963.1	0	0	0	0	0	0	1	0	0
AC006965.1	0	0	0	0	0	0	0	1	0
AC006967.1	0	0	0	0	0	0	0	0	0
AC006967.2	0	0	0	0	0	0	0	0	0
AC006967.3	0	0	0	0	0	0	0	0	0
AC006970.1	1	1	1	1	3	2	1	2	0
AC006970.2	4	0	0	0	2	0	1	0	2
AC006970.3	0	0	0	0	0	0	0	0	0
AC006971.1	9	8	9	5	3	5	2	7	6
AC006972.1	0	0	0	0	0	0	0	0	0
AC006974.1	0	1	0	0	1	2	1	1	1
AC006974.2	0	0	0	0	0	0	0	0	0
AC006978.1	58	52	78	73	97	90	126	49	42
AC006978.2	0	0	0	0	0	0	0	0	0
AC006986.1	0	0	0	0	0	0	0	0	0
AC006987.1	0	0	0	0	0	0	0	0	0
AC006987.2	0	0	0	0	0	0	0	0	0
AC006987.3	0	0	0	0	0	0	0	0	0
AC006988.1	0	0	0	0	0	0	0	0	0
AC006989.1	0	0	0	0	0	0	0	0	0
AC006994.1	0	0	0	1	1	2	0	0	1
AC006994.2	0	0	1	0	0	1	1	0	0
AC006994.3	0	0	0	0	0	0	0	0	0
AC007000.1	2	3	4	1	6	3	2	1	2
AC007000.2	0	1	0	0	0	2	0	0	0
AC007000.3	0	0	0	0	0	0	2	0	0
AC007001.1	4	1	2	2	0	0	0	1	1
AC007003.1	0	0	0	0	0	0	0	0	0
AC007009.1	0	0	0	0	0	0	0	0	0
AC007009.2	0	0	0	0	0	0	1	0	0
AC007012.1	0	0	0	0	0	0	0	0	0
AC007012.2	0	0	0	0	0	0	0	0	0
AC007014.1	0	0	0	0	0	0	1	0	0
AC007014.2	1	1	0	0	0	0	0	0	0
AC007016.1	0	0	0	0	0	0	0	0	1
AC007025.1	0	0	0	0	0	0	0	0	0
AC007029.1	0	0	0	0	0	0	0	0	1
AC007032.1	0	0	0	0	0	0	0	0	0
AC007036.1	0	0	1	0	0	0	0	0	0
AC007036.2	1	0	1	1	1	1	0	0	0
AC007036.3	0	0	0	0	0	0	0	0	0
AC007038.1	8	9	4	1	2	8	8	3	3
AC007038.2	25	14	18	10	15	9	19	14	5
AC007040.1	0	0	0	1	1	1	1	0	0
AC007040.2	0	1	0	0	0	0	0	0	0
AC007040.3	0	0	0	0	0	0	0	0	0
AC007041.1	9	1	2	2	0	6	1	2	0
AC007050.1	0	0	0	0	0	0	0	0	0
AC007056.1	0	0	0	0	0	0	0	0	0
AC007064.1	0	0	0	0	0	0	0	0	0
AC007064.2	0	0	0	0	0	0	0	0	0
AC007064.3	0	0	0	0	0	0	0	0	0
AC007064.4	0	0	0	0	0	0	0	0	0
AC007066.1	1	1	1	0	1	1	2	0	0
AC007066.2	69	41	68	64	48	64	85	52	50
AC007068.1	0	0	0	0	0	0	0	0	0
AC007068.2	0	0	0	0	0	0	0	0	0
AC007091.1	1	0	0	0	2	1	0	0	0
AC007092.1	0	0	0	0	0	0	0	0	0
AC007096.1	0	0	0	1	0	0	0	0	0
AC007098.1	23	20	17	21	14	22	21	12	16
AC007098.2	0	0	0	0	0	2	0	0	0
AC007099.1	0	0	0	0	0	0	0	0	0
AC007099.2	0	0	0	0	0	0	0	0	0
AC007100.1	0	0	0	0	0	0	0	0	0
AC007106.1	0	0	0	0	0	0	0	0	0
AC007114.1	7	2	10	3	2	1	2	3	4
AC007114.2	6	2	4	3	0	7	3	0	2
AC007115.1	0	0	0	0	0	0	0	0	0
AC007126.1	0	0	0	0	0	0	0	0	0
AC007128.1	14	2	2	8	7	8	20	6	12
AC007128.2	4	0	1	2	1	0	2	2	4
AC007131.3	0	0	0	0	0	0	0	0	0
AC007132.1	0	0	0	0	0	0	0	0	0
AC007136.1	0	0	0	0	0	0	0	0	0
AC007151.1	0	0	0	0	0	0	0	0	0
AC007159.1	0	0	0	0	0	0	0	0	0
AC007160.1	0	0	0	0	0	0	0	1	0
AC007161.1	0	0	0	1	0	0	0	0	0
AC007161.2	0	0	0	0	0	0	0	0	0
AC007161.3	0	0	0	0	0	0	0	0	0
AC007163.1	0	0	0	0	0	0	0	1	0
AC007179.1	0	0	0	0	0	0	0	0	0
AC007179.2	0	0	2	1	2	0	0	0	0
AC007179.3	0	0	0	0	0	0	0	0	0
AC007182.1	0	0	0	0	0	0	0	0	0
AC007182.2	64	31	58	35	22	31	28	22	29
AC007191.1	109	75	126	79	96	91	172	64	84
AC007192.1	0	1	0	0	0	0	0	0	0
AC007192.2	0	0	0	0	0	0	0	0	0
AC007193.1	0	0	0	0	0	0	0	0	0
AC007193.2	0	3	0	0	6	6	4	1	1
AC007193.3	0	0	0	0	0	0	0	0	0
AC007204.1	12	8	7	9	13	8	7	8	5
AC007207.1	0	0	0	0	0	0	0	0	0
AC007207.2	6	1	1	0	3	2	2	2	1
AC007215.1	0	0	0	0	0	0	0	0	0
AC007216.1	0	0	0	0	1	0	0	0	0
AC007216.2	0	0	0	0	0	1	0	0	0
AC007216.3	12	5	7	11	4	7	6	5	5
AC007216.4	2	1	1	4	1	1	3	2	0
AC007216.5	0	0	0	0	0	0	0	0	0
AC007218.1	60	22	30	29	31	20	30	15	26
AC007218.2	0	3	1	0	0	1	0	0	0
AC007220.1	0	0	0	0	0	0	0	0	0
AC007221.1	0	0	0	0	0	0	0	0	0
AC007221.2	0	0	0	0	0	0	0	0	0
AC007223.1	0	0	0	0	0	0	0	0	0
AC007224.1	0	0	0	0	0	0	0	0	0
AC007224.2	0	0	0	0	0	0	0	1	0
AC007225.1	1	0	4	3	1	3	2	1	1
AC007225.2	0	0	0	0	0	0	0	0	0
AC007228.1	9	9	10	12	4	7	4	5	6
AC007229.1	40	17	49	44	28	34	34	25	34
AC007237.1	0	0	0	0	0	0	0	0	0
AC007238.1	24	14	27	17	11	11	18	13	13
AC007240.1	5	3	5	8	8	6	11	4	4
AC007240.2	6	0	3	1	1	4	3	2	1
AC007241.1	0	0	0	0	0	0	0	0	0
AC007242.1	0	0	0	0	0	0	0	0	0
AC007249.1	2	1	2	0	1	1	0	1	1
AC007249.2	21	10	16	6	3	7	17	7	8
AC007250.1	2	2	3	3	1	0	2	1	1
AC007253.1	0	0	0	0	0	0	0	0	0
AC007255.1	3	7	9	9	1	10	6	5	7
AC007255.2	0	0	0	0	0	0	0	0	0
AC007256.1	6	2	4	9	0	3	1	3	1
AC007262.1	0	0	0	0	0	0	0	0	0
AC007262.2	1	1	1	0	1	0	0	0	2
AC007272.1	1	3	2	2	0	1	2	0	1
AC007274.1	0	0	0	0	0	0	0	0	0
AC007274.2	0	0	0	0	0	0	0	0	0
AC007274.3	0	0	0	0	0	0	0	0	0
AC007275.1	0	0	0	0	0	0	0	0	0
AC007277.1	0	0	0	1	1	2	0	0	1
AC007278.1	0	0	0	0	0	0	0	0	0
AC007278.2	0	0	0	0	0	0	0	0	0
AC007279.1	1	1	0	0	2	1	2	0	1
AC007283.1	0	0	0	0	0	0	0	0	0
AC007283.2	1	0	0	1	0	0	0	0	0
AC007285.1	1	5	1	2	4	1	7	0	0
AC007285.2	3	1	4	0	4	1	2	4	0
AC007292.1	11	8	9	5	7	6	3	7	6
AC007292.2	2	6	1	3	5	4	3	3	2
AC007292.3	0	0	0	0	0	0	0	0	0
AC007298.1	0	0	0	0	0	0	0	0	0
AC007298.2	1	1	0	0	1	0	1	0	0
AC007308.1	0	0	0	0	0	0	0	0	0
AC007308.6	1	0	1	0	2	4	3	1	0
AC007312.1	1	0	2	3	0	1	1	2	2
AC007314.1	0	1	0	0	1	1	0	0	1
AC007318.1	271	143	325	196	127	144	244	151	182
AC007318.2	16	14	38	19	16	17	20	15	18
AC007319.1	25	10	20	9	8	2	10	12	12
AC007322.1	0	0	0	0	0	0	0	0	0
AC007322.2	0	0	0	0	0	0	0	0	0
AC007322.3	0	0	0	0	0	0	0	0	0
AC007322.4	0	0	0	0	0	0	0	0	0
AC007326.1	0	0	1	0	3	0	0	0	1
AC007326.2	0	0	1	0	1	2	2	1	0
AC007326.3	2	0	0	0	1	1	1	2	1
AC007326.4	0	0	0	0	0	0	0	0	0
AC007326.5	1	0	4	3	0	7	17	9	4
AC007327.1	0	0	0	0	0	0	0	0	0
AC007327.2	0	0	0	0	0	0	0	0	0
AC007333.1	0	0	0	0	0	0	1	0	0
AC007333.2	0	0	0	0	0	0	0	0	0
AC007336.1	6	2	2	1	4	2	5	2	1
AC007336.2	0	0	0	0	0	0	0	0	0
AC007336.3	0	0	0	0	0	0	0	0	1
AC007339.1	0	0	0	0	0	0	0	0	0
AC007342.1	0	0	0	1	0	0	0	0	0
AC007342.2	0	0	0	0	0	0	0	0	0
AC007342.3	1	1	1	3	2	3	1	0	3
AC007342.4	0	0	0	0	0	0	0	0	0
AC007342.5	1	1	1	1	0	0	0	0	0
AC007342.6	5	2	1	1	2	3	1	3	0
AC007342.7	15	9	22	9	15	14	19	7	8
AC007342.8	0	0	0	0	0	0	0	0	0
AC007342.9	2	0	0	0	0	0	0	0	0
AC007344.1	1	0	1	1	0	0	1	2	0
AC007346.1	0	0	0	0	0	0	0	0	0
AC007346.2	0	0	0	0	0	0	0	0	0
AC007347.1	2	0	0	2	2	0	0	0	0
AC007349.1	0	0	0	0	0	0	0	0	0
AC007349.2	0	0	0	0	0	0	0	0	0
AC007349.3	0	0	0	0	0	0	0	0	0
AC007349.4	1	0	0	0	0	0	0	0	0
AC007353.1	0	0	0	0	0	0	0	0	0
AC007358.1	0	0	0	0	0	0	0	0	0
AC007359.1	0	0	0	0	0	0	0	0	0
AC007362.1	3	2	0	0	0	0	2	0	0
AC007363.1	0	0	0	0	0	0	0	0	0
AC007364.1	0	0	0	0	1	0	0	0	1
AC007365.1	6	2	0	0	3	1	1	0	0
AC007365.2	2	0	0	0	0	0	0	0	0
AC007368.1	7	2	3	2	3	1	6	6	2
AC007368.2	0	0	0	0	0	0	0	0	0
AC007370.1	0	1	0	0	0	0	0	0	0
AC007370.2	0	1	1	0	3	0	0	0	0
AC007375.1	0	0	0	0	0	0	0	0	0
AC007375.2	7	12	19	12	13	17	13	9	13
AC007376.1	0	0	0	0	0	0	0	0	0
AC007376.2	0	0	0	0	0	0	0	0	1
AC007377.1	0	0	0	0	0	0	0	0	0
AC007378.1	0	0	0	0	0	0	0	0	0
AC007382.1	43	26	32	30	13	31	22	12	26
AC007383.1	0	0	0	0	0	0	0	0	0
AC007383.2	28	31	64	36	37	45	45	29	28
AC007383.3	0	0	0	0	0	0	0	0	0
AC007384.1	0	0	0	0	0	0	0	0	0
AC007386.1	1	1	0	0	3	1	7	3	1
AC007386.4	0	1	0	1	0	0	0	0	0
AC007387.1	0	1	0	1	0	1	1	0	0
AC007388.1	27	18	15	13	10	13	16	8	20
AC007389.1	4	2	2	1	2	1	1	2	0
AC007389.2	0	0	0	0	1	0	0	0	0
AC007389.3	0	0	0	0	0	0	0	0	0
AC007389.4	0	0	0	0	0	0	0	0	0
AC007389.5	2	2	9	7	5	4	8	3	1
AC007390.1	0	1	0	2	0	0	3	0	0
AC007390.2	38	22	36	24	31	24	43	25	24
AC007391.1	0	0	0	1	0	0	1	0	0
AC007394.1	0	0	0	0	0	0	0	0	0
AC007395.1	0	0	0	0	0	0	0	0	0
AC007402.1	0	0	1	0	0	0	0	0	1
AC007403.1	0	0	0	0	0	0	0	0	0
AC007405.1	2	2	0	3	2	0	4	2	4
AC007405.2	0	0	0	0	0	0	0	0	0
AC007405.3	32	14	41	27	20	17	24	16	35
AC007406.1	0	0	0	0	0	0	0	0	0
AC007406.2	0	0	0	0	0	0	0	0	0
AC007406.3	0	0	1	0	1	0	4	2	3
AC007406.4	0	0	0	1	1	2	2	0	0
AC007406.5	76	47	74	51	62	47	58	43	22
AC007421.1	0	0	0	0	0	0	0	0	0
AC007422.1	0	0	0	0	0	0	0	0	0
AC007422.2	0	0	0	0	0	0	0	0	0
AC007423.1	0	0	0	0	0	0	0	0	0
AC007424.1	3	2	0	2	0	1	1	1	1
AC007431.1	0	0	0	1	3	0	0	0	0
AC007431.2	0	0	0	0	0	0	0	0	0
AC007431.3	0	0	1	0	0	0	0	0	0
AC007435.1	0	0	0	0	0	0	0	0	0
AC007436.1	0	0	0	0	0	0	0	0	0
AC007448.1	0	0	0	0	0	0	0	0	0
AC007448.2	0	0	0	0	0	0	0	0	0
AC007448.3	1	3	4	4	3	1	5	7	4
AC007448.4	3	4	3	4	6	7	8	7	3
AC007450.1	0	0	0	0	0	0	0	0	0
AC007450.2	0	0	0	0	0	0	0	0	0
AC007450.3	0	0	0	0	0	0	0	0	0
AC007450.4	0	0	1	0	0	0	0	0	0
AC007458.1	1	0	0	0	0	0	0	0	0
AC007461.1	0	0	0	0	0	0	0	0	0
AC007463.1	18	9	4	2	5	6	2	3	5
AC007485.1	0	1	0	0	0	0	1	0	0
AC007485.2	121	92	98	56	99	102	78	87	67
AC007486.1	0	0	0	0	0	0	0	0	0
AC007490.1	8	4	8	7	8	8	8	6	10
AC007491.1	0	0	0	1	0	1	0	0	0
AC007493.1	1	1	0	0	0	0	0	0	1
AC007493.2	0	0	0	0	0	0	0	0	0
AC007494.1	0	0	0	0	0	0	1	0	1
AC007494.2	2	1	0	1	1	0	1	0	0
AC007494.3	2	0	0	0	1	2	1	0	0
AC007495.1	3	3	2	2	6	6	5	4	2
AC007495.2	0	0	0	0	0	0	0	0	0
AC007496.1	0	0	1	0	2	1	0	0	0
AC007496.2	0	0	0	0	1	0	1	0	0
AC007496.3	0	0	2	0	0	0	0	0	0
AC007497.1	4	4	3	4	2	4	3	3	2
AC007513.1	0	0	0	0	0	0	0	0	0
AC007527.1	0	0	0	0	0	0	0	0	0
AC007527.2	0	0	0	0	0	0	0	0	0
AC007528.1	0	0	0	0	0	0	0	0	0
AC007529.1	0	0	0	0	0	0	0	0	0
AC007529.2	0	0	0	1	0	0	0	0	0
AC007533.1	0	0	0	2	6	4	0	0	1
AC007535.1	0	0	0	0	0	0	0	0	0
AC007536.1	0	0	0	0	0	0	1	0	0
AC007537.1	164	101	132	150	85	85	166	91	120
AC007537.2	0	0	2	0	0	0	1	1	0
AC007540.1	0	1	0	0	1	1	0	1	0
AC007541.1	1	2	4	1	1	2	4	0	5
AC007546.1	2	0	1	1	0	0	0	0	0
AC007546.2	0	0	0	0	0	0	0	0	0
AC007547.1	0	1	0	2	0	0	0	0	0
AC007547.2	0	0	0	0	0	0	0	0	0
AC007551.1	0	0	0	0	0	0	0	0	0
AC007552.1	1	0	0	1	0	0	1	0	0
AC007552.2	4	2	1	2	1	4	3	1	2
AC007556.1	0	0	0	0	0	0	0	0	0
AC007557.1	0	0	0	0	0	0	0	0	0
AC007557.2	0	0	0	0	0	0	0	0	0
AC007557.3	0	0	0	0	0	0	0	0	0
AC007557.4	0	0	0	0	0	0	0	0	0
AC007559.1	0	0	1	0	0	0	0	0	0
AC007560.1	9	9	10	7	1	6	9	3	4
AC007560.2	0	0	0	0	0	0	0	0	0
AC007562.1	0	0	1	0	0	1	1	0	1
AC007563.1	0	0	0	0	0	0	1	0	0
AC007563.2	0	0	0	0	0	0	0	0	0
AC007563.3	1	0	0	1	0	0	0	0	0
AC007566.1	5	3	3	1	3	3	7	2	4
AC007566.2	0	0	0	0	0	0	0	0	0
AC007567.1	0	0	0	0	0	0	0	0	0
AC007568.1	0	0	0	0	0	0	0	0	0
AC007569.1	1	0	0	0	0	0	0	0	0
AC007570.1	0	0	1	0	0	0	0	2	0
AC007595.1	0	0	0	0	0	0	0	0	0
AC007598.1	0	0	0	0	0	0	0	0	0
AC007598.2	0	0	0	0	0	0	0	0	0
AC007598.3	0	0	0	0	0	0	0	0	0
AC007599.1	0	0	0	0	0	0	0	0	0
AC007599.2	0	0	0	0	0	0	0	1	0
AC007601.1	0	0	0	1	1	0	1	0	1
AC007601.2	0	0	0	0	0	0	0	0	0
AC007603.1	0	0	1	0	0	0	0	0	0
AC007603.2	0	0	0	0	0	0	0	0	0
AC007603.3	0	0	0	0	0	0	0	0	0
AC007608.1	0	0	0	0	0	0	1	0	0
AC007608.2	0	0	0	0	0	0	0	0	0
AC007608.3	0	0	0	0	1	0	0	0	1
AC007608.4	1	0	1	0	0	1	1	1	0
AC007610.1	0	0	0	0	0	0	0	0	0
AC007610.2	1	1	0	0	1	2	3	2	1
AC007610.3	0	0	0	0	0	1	0	0	0
AC007610.4	2	2	3	2	4	1	17	5	4
AC007611.1	2	0	3	4	5	3	5	1	1
AC007613.1	0	1	3	2	2	0	1	0	3
AC007614.1	7	3	10	3	11	8	7	3	2
AC007614.2	0	0	0	0	0	0	0	0	0
AC007618.1	0	0	0	0	0	0	0	0	0
AC007619.1	1	0	0	2	1	1	1	0	1
AC007619.2	1	0	0	0	0	0	0	0	0
AC007620.1	0	0	0	0	0	0	0	0	0
AC007620.2	0	0	0	0	0	0	0	0	0
AC007620.3	0	1	1	0	1	0	0	0	0
AC007621.1	6	0	3	2	2	4	1	0	2
AC007622.1	3	0	0	1	0	2	1	0	1
AC007622.2	7	3	4	8	9	10	21	11	8
AC007631.1	0	0	0	0	0	0	0	0	0
AC007637.1	1	2	0	1	1	0	1	0	0
AC007638.1	0	0	1	0	0	0	0	0	0
AC007638.2	0	0	0	0	0	0	0	0	0
AC007639.1	0	0	0	0	0	0	0	0	0
AC007652.1	0	0	0	0	0	0	0	0	0
AC007655.1	0	0	0	0	0	0	0	0	0
AC007656.1	0	1	1	1	2	0	2	0	0
AC007656.2	0	0	0	0	1	0	0	0	0
AC007663.1	3	6	13	9	11	21	23	8	11
AC007663.2	1	1	1	1	0	0	0	1	0
AC007663.3	1	0	0	1	0	1	1	0	0
AC007663.4	8	9	5	5	4	4	9	5	9
AC007666.1	2	2	2	0	3	1	3	5	1
AC007671.1	0	0	0	0	0	0	0	0	0
AC007673.1	0	0	0	0	0	0	0	0	0
AC007677.1	0	0	0	0	0	0	0	0	0
AC007679.1	0	0	0	0	0	0	0	0	0
AC007679.2	0	0	0	1	0	0	0	0	0
AC007681.1	2	1	4	4	4	6	5	3	1
AC007682.2	0	0	0	0	0	0	0	0	0
AC007682.3	0	0	0	0	0	0	0	0	0
AC007683.1	24	15	28	16	6	12	17	21	10
AC007683.2	0	0	0	0	0	0	0	2	0
AC007684.1	2	0	0	1	0	0	1	0	1
AC007685.1	0	0	0	0	0	0	0	0	0
AC007686.1	0	0	0	0	0	0	0	0	0
AC007686.2	0	0	0	0	0	0	0	0	0
AC007686.3	13	12	14	7	21	19	27	20	9
AC007686.4	2	0	3	2	0	0	1	1	2
AC007687.1	0	1	0	1	1	2	0	0	0
AC007688.1	1	0	1	0	2	2	1	1	0
AC007688.2	0	0	0	0	0	0	0	0	0
AC007690.1	2	7	5	3	8	8	5	3	2
AC007718.1	0	0	0	0	0	0	0	0	0
AC007728.1	0	0	0	0	0	0	0	0	0
AC007728.2	7	4	13	7	2	5	11	4	5
AC007728.3	0	1	0	0	0	0	0	1	0
AC007731.1	0	0	0	0	0	0	0	0	0
AC007731.2	12	8	8	6	11	11	18	10	16
AC007731.3	0	0	0	0	0	1	0	1	1
AC007731.4	0	0	0	0	0	0	0	0	0
AC007731.5	0	0	0	0	0	0	0	0	0
AC007738.1	0	0	0	0	0	0	0	0	0
AC007741.1	0	0	0	0	1	1	0	0	0
AC007742.1	0	0	0	0	0	0	0	0	0
AC007742.2	0	0	0	0	0	0	0	0	0
AC007743.1	5	6	6	4	5	4	14	4	7
AC007744.1	0	0	0	0	0	0	0	0	0
AC007749.1	0	0	0	0	0	0	0	0	0
AC007750.1	0	0	0	0	0	0	0	0	0
AC007751.1	0	1	0	0	0	0	0	0	1
AC007751.2	0	0	0	1	0	0	1	0	0
AC007773.1	5	1	3	2	3	3	2	6	2
AC007773.3	0	0	0	0	0	0	0	0	0
AC007780.1	1	0	0	1	0	2	0	0	2
AC007785.1	0	0	0	0	0	0	0	0	0
AC007785.2	0	0	0	1	0	0	0	0	0
AC007785.3	8	5	3	1	14	11	9	3	2
AC007786.1	1	0	0	1	0	0	0	0	0
AC007786.2	0	0	0	0	0	0	0	0	0
AC007786.3	0	0	0	0	0	0	0	0	0
AC007787.1	0	0	0	0	0	0	0	0	0
AC007790.1	1	0	3	0	1	3	0	1	0
AC007792.1	0	0	0	0	0	0	0	0	0
AC007795.1	0	0	0	0	0	0	0	0	0
AC007823.1	3	3	1	3	5	3	1	2	2
AC007834.1	1	0	0	0	0	0	0	0	0
AC007834.2	3	1	1	0	0	2	2	0	1
AC007842.1	37	17	23	26	23	31	57	18	17
AC007846.1	1	2	1	1	0	2	0	0	2
AC007846.2	0	0	0	0	0	0	0	0	0
AC007848.1	0	0	0	0	0	1	3	0	1
AC007848.2	0	0	0	0	0	0	0	0	0
AC007849.1	0	0	0	0	0	0	0	0	0
AC007849.2	1	0	1	0	0	0	0	0	0
AC007861.1	0	0	0	0	0	0	0	0	0
AC007861.2	0	0	0	0	0	0	0	0	0
AC007876.1	0	0	0	0	0	0	0	0	0
AC007878.1	32	20	32	19	19	27	42	22	12
AC007879.1	0	0	0	0	0	0	0	0	0
AC007879.2	0	0	0	0	0	0	0	0	0
AC007879.3	3	2	1	1	1	0	0	1	1
AC007879.4	0	0	0	1	0	0	0	0	0
AC007881.1	0	1	0	0	0	1	0	0	0
AC007881.2	0	0	0	0	0	0	0	0	0
AC007881.3	2	1	2	1	0	0	1	2	1
AC007899.1	0	0	0	0	0	0	0	0	0
AC007906.1	0	0	0	0	0	0	1	0	0
AC007906.2	40	12	57	37	59	61	64	29	28
AC007907.1	0	1	0	0	0	0	0	1	0
AC007919.1	0	0	0	0	0	0	0	0	0
AC007919.2	0	0	0	0	0	0	0	0	0
AC007920.1	0	0	0	0	0	0	0	0	0
AC007920.2	0	0	0	0	1	1	1	1	0
AC007922.1	0	0	0	0	0	0	0	0	0
AC007922.2	0	0	0	0	0	0	3	0	0
AC007922.3	0	0	0	0	0	0	0	0	0
AC007923.1	0	0	0	1	0	0	0	0	0
AC007923.2	0	0	0	0	0	0	0	0	0
AC007923.3	0	0	0	0	0	0	0	0	0
AC007923.4	0	0	0	0	0	0	0	0	0
AC007938.1	4	5	1	0	1	1	4	1	4
AC007938.2	2	3	6	2	8	7	8	7	3
AC007938.3	15	15	11	10	12	17	21	16	7
AC007948.1	0	0	0	0	0	0	0	0	0
AC007950.1	0	0	0	0	0	0	0	0	0
AC007950.2	0	0	0	0	0	0	0	0	0
AC007952.1	1	0	0	0	0	0	1	0	0
AC007952.2	1	1	1	0	1	1	3	1	1
AC007952.3	0	0	0	0	0	0	0	0	0
AC007952.4	0	0	2	1	2	1	0	1	0
AC007952.5	0	0	0	0	0	0	0	0	0
AC007952.6	0	0	1	0	0	0	1	0	0
AC007952.7	0	0	0	0	0	0	0	0	0
AC007952.8	0	0	0	0	0	0	0	0	0
AC007952.9	0	0	0	0	0	0	0	0	0
AC007953.1	0	0	0	0	0	0	0	0	0
AC007953.2	0	0	0	0	0	0	0	0	0
AC007954.1	0	1	0	2	0	0	1	1	0
AC007956.1	0	0	4	0	0	0	1	0	0
AC007965.1	0	0	0	0	0	0	0	0	0
AC007966.1	1	1	1	0	2	0	1	0	1
AC007967.1	0	0	0	0	0	0	0	0	0
AC007967.2	0	0	0	0	0	0	0	0	0
AC007967.3	0	0	0	0	0	0	0	0	0
AC007969.1	243	156	304	173	144	143	183	120	156
AC007969.2	0	0	0	0	0	0	1	0	0
AC007991.1	0	0	0	0	0	0	0	0	0
AC007991.2	17	6	10	13	17	17	21	8	4
AC007991.3	3	8	9	10	8	9	16	14	4
AC007991.4	2	4	3	1	1	7	6	2	0
AC007992.1	0	0	0	0	0	0	0	0	0
AC007992.2	0	0	0	0	0	0	0	0	0
AC007993.1	1	0	0	0	0	0	0	0	0
AC007993.2	0	0	0	0	0	0	0	0	0
AC007993.3	1	0	0	0	2	0	2	1	0
AC007996.1	38	34	59	35	32	24	48	27	23
AC007998.1	0	0	0	0	0	0	0	0	0
AC007998.2	0	0	0	0	0	0	0	0	0
AC007998.3	0	3	5	2	3	4	1	1	2
AC007998.4	0	0	0	0	1	0	0	0	0
AC007998.5	1	0	1	0	0	0	0	0	0
AC008011.1	0	0	0	0	0	0	0	0	0
AC008011.2	0	0	0	0	0	0	0	0	0
AC008012.1	0	0	0	0	1	0	0	0	0
AC008013.1	3	0	1	2	1	2	6	0	0
AC008013.2	0	0	0	0	0	0	0	0	0
AC008013.3	0	0	0	0	1	1	0	0	0
AC008014.1	15	3	6	7	6	6	4	9	9
AC008015.1	1	0	0	0	0	0	0	0	0
AC008026.1	2	1	0	1	1	1	1	0	1
AC008026.2	0	0	0	0	0	0	0	0	0
AC008026.3	0	0	0	0	3	2	1	2	0
AC008033.1	0	1	0	0	0	0	0	1	0
AC008033.2	0	0	0	0	0	0	0	0	0
AC008033.3	0	0	0	0	0	0	0	0	0
AC008035.1	3	0	3	0	2	0	0	2	1
[truncated: 55,787 more rows]

## Sheet: STITCHvsHap
baseMean	log2FoldChange	lfcSE	stat	pvalue	padj	gene_name
0.8096	0.0216213	0.0524273	0.402001	0.687683	NA	5S_rRNA
6.24597	0.144307	0.123102	1.20992	0.226309	NA	7SK
2.6905	0.0244154	0.09474	0.263381	0.792257	NA	A1BG
9.83709	-0.0398304	0.147701	-0.271837	0.785748	0.942741	A1BG-AS1
0.95545	-0.0216683	0.0619273	-0.35346	0.723743	NA	A1CF
21.4558	-0.0258147	0.073565	-0.354648	0.722853	0.925022	A2M
5.40694	0.0224318	0.123712	0.179485	0.857557	NA	A2M-AS1
46.8246	-0.00307715	0.178039	-0.0172825	0.986211	0.997455	A2ML1
0.666844	0.0328956	0.0485398	0.666634	0.505006	NA	A2ML1-AS1
0.12937	-0.00534709	0.0312767	-0.170961	0.864254	NA	A2ML1-AS2
0.556356	-0.0178339	0.045566	-0.368086	0.712809	NA	A2MP1
0.3018	0.00241329	0.0341192	0.0707313	0.943612	NA	A3GALT2
53.0339	0.517119	0.177181	2.91851	0.00351709	0.0507907	A4GALT
0.179667	0.00939687	0.0312767	0.300443	0.763839	NA	A4GNT
0	NA	NA	NA	NA	NA	AA06
597.16	-0.124733	0.121698	-1.02481	0.305451	0.704519	AAAS
666.686	0.133931	0.138722	0.96546	0.334314	0.729459	AACS
10.0966	-0.137686	0.149461	-0.922407	0.356317	0.744813	AACSP1
0	NA	NA	NA	NA	NA	AADAC
0	NA	NA	NA	NA	NA	AADACL2
0	NA	NA	NA	NA	NA	AADACL2-AS1
4.36145	0.0308466	0.116709	0.265783	0.790406	NA	AADACL3
0.309037	0.00245584	0.0344158	0.071358	0.943113	NA	AADACL4
0	NA	NA	NA	NA	NA	AADACP1
178.994	0.00675791	0.158439	0.0426483	0.965982	0.993476	AADAT
693.233	-0.137762	0.117291	-1.1744	0.240233	0.638272	AAGAB
654.748	0.41062	0.119042	3.44911	0.000562438	0.0137883	AAK1
47.6166	0.0818599	0.179055	0.456664	0.647913	0.897588	AAMDC
1002.86	-0.0372393	0.116061	-0.320842	0.74833	0.932734	AAMP
2.53148	-0.0310048	0.0937943	-0.331144	0.740536	NA	AANAT
372.258	-0.339186	0.138086	-2.45496	0.0140901	0.132871	AAR2
24.8996	0.0152083	0.176401	0.0859811	0.931481	0.984641	AARD
2357.83	-0.109807	0.109963	-0.998542	0.318017	0.71321	AARS
392.427	0.194008	0.142008	1.36647	0.17179	0.544898	AARS2
61.2484	-0.0476761	0.177212	-0.26928	0.787714	0.942975	AARSD1
0	NA	NA	NA	NA	NA	AARSP1
216.288	0.0086732	0.142076	0.0610325	0.951333	0.989707	AASDH
471.39	-0.160852	0.123065	-1.30695	0.191231	0.572608	AASDHPPT
4801.41	0.0990492	0.131109	0.755473	0.449965	0.805801	AASS
5.23005	0.0452599	0.12179	0.374197	0.708258	NA	AATBC
861.022	-0.271485	0.124384	-2.18224	0.029092	0.209271	AATF
35.9113	0.163589	0.179082	0.916148	0.359589	0.74768	AATK
0	NA	NA	NA	NA	NA	AB015752.1
0	NA	NA	NA	NA	NA	AB019440.1
4.35309	0.032809	0.118193	0.279055	0.780203	NA	ABALON
127.175	0.600828	0.15828	3.79294	0.000148873	0.00498041	ABAT
0	NA	NA	NA	NA	NA	ABBA01006766.1
0	NA	NA	NA	NA	NA	ABC7-43041300I9.1
728.724	0.76765	0.139741	5.49333	3.94433e-08	6.0435e-06	ABCA1
3.97729	-0.11396	0.112178	-1.03352	0.301359	NA	ABCA10
31.0979	-0.317848	0.177787	-1.79036	0.0733963	0.360326	ABCA11P
2.01587	-0.0424396	0.0824605	-0.525125	0.599496	NA	ABCA12
5.41146	0.116345	0.12316	0.963588	0.335252	NA	ABCA13
1.22738	0.0145002	0.0656082	0.217842	0.827552	NA	ABCA17P
95.5571	0.305777	0.173902	1.75846	0.0786697	0.37504	ABCA2
108.319	0.476464	0.161684	2.94721	0.00320653	0.0476481	ABCA3
1.62022	0.0145365	0.0754366	0.192376	0.847448	NA	ABCA4
183.259	-0.0642368	0.162783	-0.394785	0.693001	0.914671	ABCA5
0	NA	NA	NA	NA	NA	ABCA6
152.054	0.78476	0.162446	4.83181	1.35298e-06	0.000117808	ABCA7
1.86583	-0.000316439	0.0787214	-0.00405579	0.996764	NA	ABCA8
0.916137	-0.0125848	0.0543359	-0.237962	0.81191	NA	ABCA9
1.08354	0.0205968	0.0547554	0.374836	0.707782	NA	ABCA9-AS1
10.3439	-0.127458	0.152154	-0.841522	0.400055	0.775755	ABCB1
215.441	-0.118507	0.152695	-0.776554	0.437422	0.800195	ABCB10
0.544167	0.0452208	0.0449341	0.987636	0.323331	NA	ABCB10P1
0.554146	-0.0355253	0.041953	-0.823816	0.410044	NA	ABCB10P3
0.964652	-0.018634	0.0593964	-0.318202	0.750332	NA	ABCB10P4
0.78982	-0.00214668	0.0479077	-0.0464116	0.962982	NA	ABCB11
12.9197	-0.0967945	0.155753	-0.621185	0.534478	0.849935	ABCB4
0.3645	0.0228702	0.0364747	0.618768	0.536069	NA	ABCB5
36.8818	0.193748	0.179197	1.08392	0.278402	0.680439	ABCB6
454.639	-0.0400689	0.122789	-0.326344	0.744164	0.931067	ABCB7
192.05	0.103686	0.163335	0.635119	0.525351	0.844719	ABCB8
53.1507	-0.193886	0.176889	-1.09688	0.272694	0.673079	ABCB9
1058.42	0.166736	0.120561	1.38312	0.166627	0.537795	ABCC1
223.754	-0.0262799	0.147296	-0.178491	0.858337	0.964993	ABCC10
2.07103	0.00654781	0.0818639	0.0796114	0.936546	NA	ABCC11
0.12937	-0.00534709	0.0312767	-0.170961	0.864254	NA	ABCC12
1.02563	0.0681444	0.0618345	1.16925	0.242303	NA	ABCC13
12.3306	0.117963	0.157113	0.7553	0.450069	0.805852	ABCC2
2.68675	-0.00887164	0.0964668	-0.0926839	0.926155	NA	ABCC3
185.468	-0.320662	0.150432	-2.13161	0.0330387	0.226699	ABCC4
933.78	-0.023297	0.131358	-0.177381	0.859209	0.964993	ABCC5
0.31002	0.00246159	0.0344557	0.0714422	0.943046	NA	ABCC5-AS1
9.24529	0.248321	0.149756	1.66884	0.0951482	NA	ABCC6
0.500349	-0.0371914	0.0410987	-0.784884	0.432521	NA	ABCC6P1
0.703403	0.00375652	0.0516723	0.0746712	0.940476	NA	ABCC6P2
15.7746	0.120605	0.16336	0.742652	0.457692	0.809694	ABCC8
0.783019	-0.0327396	0.051778	-0.659167	0.509789	NA	ABCC9
55.0863	0.116599	0.176799	0.658781	0.510036	0.838699	ABCD1
0	NA	NA	NA	NA	NA	ABCD1P2
0	NA	NA	NA	NA	NA	ABCD1P3
0	NA	NA	NA	NA	NA	ABCD1P4
0	NA	NA	NA	NA	NA	ABCD1P5
0.893733	-0.0466744	0.0582769	-0.850342	0.395135	NA	ABCD2
596.255	-0.129555	0.116823	-1.10892	0.267464	0.668015	ABCD3
691.01	0.150351	0.150425	0.999792	0.317411	0.713017	ABCD4
1652.06	-0.357265	0.115702	-3.08751	0.00201844	0.0342107	ABCE1
0	NA	NA	NA	NA	NA	ABCF1
223.724	-0.365206	0.141574	-2.57837	0.00992668	0.105184	ABCF2
2.6212	0.0492406	0.0900281	0.548446	0.583386	NA	ABCF2P1
0	NA	NA	NA	NA	NA	ABCF2P2
434.574	-0.120885	0.126601	-0.954752	0.339703	0.733399	ABCF3
58.8565	0.162857	0.175597	0.928547	0.353124	0.743332	ABCG1
30.6197	-0.301933	0.176168	-1.71503	0.0863398	0.391614	ABCG2
8.66631	0.318257	0.144646	2.24882	0.0245236	NA	ABCG4
0.695184	0.0027838	0.0488224	0.0578323	0.953882	NA	ABCG5
1.34136	0.0754463	0.072035	1.07605	0.281905	NA	ABCG8
6.59946	0.0507625	0.134718	0.377531	0.705779	NA	ABHD1
220.28	-0.28007	0.16303	-1.71673	0.0860286	0.390752	ABHD10
140.896	0.109613	0.157941	0.693978	0.487696	0.827059	ABHD11
0.376689	-0.025305	0.0372139	-0.581802	0.5607	NA	ABHD11-AS1
614.611	0.00412688	0.125638	0.0328525	0.973792	0.995292	ABHD12
4.83037	0.0494639	0.120979	0.410589	0.681374	NA	ABHD12B
341.19	-0.0602806	0.160883	-0.374867	0.707759	0.920026	ABHD13
11.9941	-0.0832806	0.155065	-0.538506	0.590228	0.877098	ABHD14A
0.887254	0.0185925	0.0567486	0.336647	0.736383	NA	ABHD14A-ACY1
28.1651	-0.19795	0.177713	-1.11582	0.264497	0.666222	ABHD14B
14.6544	0.0915081	0.160875	0.56942	0.569071	0.869037	ABHD15
0	NA	NA	NA	NA	NA	ABHD15-AS1
0	NA	NA	NA	NA	NA	ABHD16A
0	NA	NA	NA	NA	NA	ABHD16B
151.818	0.0864241	0.165771	0.521716	0.601868	0.881858	ABHD17A
0	NA	NA	NA	NA	NA	ABHD17AP1
0	NA	NA	NA	NA	NA	ABHD17AP2
0.3018	0.00241329	0.0341192	0.0707313	0.943612	NA	ABHD17AP3
0	NA	NA	NA	NA	NA	ABHD17AP4
0.646413	-0.025221	0.0504494	-0.499141	0.61768	NA	ABHD17AP5
0.12366	-0.00534709	0.0312767	-0.170961	0.864254	NA	ABHD17AP6
0	NA	NA	NA	NA	NA	ABHD17AP7
0	NA	NA	NA	NA	NA	ABHD17AP8
0	NA	NA	NA	NA	NA	ABHD17AP9
607.087	-0.0620569	0.125811	-0.493207	0.621866	0.887747	ABHD17B
312.959	0.0690017	0.13344	0.517027	0.605138	0.883216	ABHD17C
266.105	0.0501511	0.138318	0.362612	0.716894	0.923263	ABHD18
515.14	-0.0123499	0.151431	-0.081574	0.934985	0.985883	ABHD2
102.241	0.317101	0.174117	1.82278	0.0683374	0.347849	ABHD3
787.882	-0.271991	0.128836	-2.11067	0.0348008	0.234381	ABHD4
341.062	0.143465	0.138011	1.03961	0.298519	0.698077	ABHD5
20.8821	0.243146	0.174072	1.39991	0.16154	0.528655	ABHD6
137.98	0.317262	0.166908	1.89971	0.0574717	0.316528	ABHD8
467.666	0.0167297	0.127923	0.130756	0.895968	0.975834	ABI1
0	NA	NA	NA	NA	NA	ABI1P1
2070.51	0.159552	0.101554	1.57113	0.116153	0.458095	ABI2
28.8484	-0.255665	0.177557	-1.43651	0.150859	0.513123	ABI3
9.05399	0.162647	0.144302	1.12417	0.260943	NA	ABI3BP
1384.07	0.022084	0.126049	0.175193	0.860928	0.965516	ABL1
487.447	0.07358	0.124697	0.590107	0.555119	0.861454	ABL2
972.735	-0.365696	0.124949	-2.92612	0.00343219	0.0501316	ABLIM1
12.2724	0.271037	0.156642	1.73491	0.0827565	0.384857	ABLIM2
9.44473	0.193056	0.147627	1.31864	0.187291	NA	ABLIM3
1.81633	0.0333762	0.0831412	0.4025	0.687316	NA	ABO
472.474	0.204822	0.136522	1.50006	0.133598	0.48739	ABR
0.18636	0.00939687	0.0312767	0.300443	0.763839	NA	ABRA
842.334	-0.0292463	0.124342	-0.235181	0.814068	0.950842	ABRACL
128.357	0.00968811	0.156339	0.0619564	0.950598	0.989707	ABRAXAS1
257.524	0.00558534	0.141441	0.0394798	0.968508	0.99387	ABRAXAS2
291.548	-0.0616206	0.140351	-0.438957	0.660692	0.902773	ABT1
0	NA	NA	NA	NA	NA	ABT1P1
60.0803	0.266578	0.17914	1.49021	0.136168	0.491682	ABTB1
123.812	-0.229415	0.161347	-1.42023	0.15554	0.520116	ABTB2
0	NA	NA	NA	NA	NA	AC000003.1
0	NA	NA	NA	NA	NA	AC000003.2
0	NA	NA	NA	NA	NA	AC000029.1
0	NA	NA	NA	NA	NA	AC000032.1
0	NA	NA	NA	NA	NA	AC000035.1
0	NA	NA	NA	NA	NA	AC000036.1
0	NA	NA	NA	NA	NA	AC000041.1
0	NA	NA	NA	NA	NA	AC000058.1
0	NA	NA	NA	NA	NA	AC000061.1
0	NA	NA	NA	NA	NA	AC000067.1
13.3781	0.0699892	0.160803	0.436103	0.662762	0.904179	AC000068.1
0.986842	-0.0524516	0.0605608	-0.938746	0.347861	NA	AC000068.2
0	NA	NA	NA	NA	NA	AC000068.3
0	NA	NA	NA	NA	NA	AC000077.1
0	NA	NA	NA	NA	NA	AC000078.1
0.12366	-0.00534709	0.0312767	-0.170961	0.864254	NA	AC000081.1
43.5898	0.00396316	0.179075	0.0221012	0.982367	0.997157	AC000089.1
0	NA	NA	NA	NA	NA	AC000095.1
0	NA	NA	NA	NA	NA	AC000095.2
0	NA	NA	NA	NA	NA	AC000099.1
0	NA	NA	NA	NA	NA	AC000111.1
0	NA	NA	NA	NA	NA	AC000111.2
2.85361	0.0307752	0.0971385	0.314693	0.752995	NA	AC000120.1
0	NA	NA	NA	NA	NA	AC000120.2
0	NA	NA	NA	NA	NA	AC000120.3
1.11842	-0.032101	0.0608828	-0.534802	0.592787	NA	AC000123.1
0.315729	0.00249481	0.0346852	0.0719272	0.94266	NA	AC000123.2
5.76293	-0.0970939	0.127318	-0.773768	0.439068	NA	AC000123.3
0	NA	NA	NA	NA	NA	AC000124.1
0	NA	NA	NA	NA	NA	AC000362.1
0.61753	0.00844166	0.0496345	0.15608	0.87597	NA	AC000367.1
0	NA	NA	NA	NA	NA	AC000372.1
0.12366	-0.00534709	0.0312767	-0.170961	0.864254	NA	AC000374.1
1.09875	-0.0295288	0.0618056	-0.487993	0.625555	NA	AC000403.1
0.563049	-0.0174904	0.045771	-0.369677	0.711623	NA	AC001226.1
0.178141	0.00939687	0.0312767	0.300443	0.763839	NA	AC002044.1
0.18636	0.00939687	0.0312767	0.300443	0.763839	NA	AC002044.2
0	NA	NA	NA	NA	NA	AC002044.3
8.27984	0.00275217	0.1435	0.019123	0.984743	NA	AC002056.1
0	NA	NA	NA	NA	NA	AC002056.2
0.926566	0.0128342	0.0613033	0.206362	0.836508	NA	AC002059.1
0.723834	0.0612367	0.0506452	1.26321	0.206515	NA	AC002059.2
0.253029	-0.0133246	0.0320067	-0.365779	0.71453	NA	AC002064.1
2.62791	-0.133875	0.0962382	-1.44507	0.148439	NA	AC002064.2
0	NA	NA	NA	NA	NA	AC002064.3
0	NA	NA	NA	NA	NA	AC002066.1
0	NA	NA	NA	NA	NA	AC002066.2
0	NA	NA	NA	NA	NA	AC002069.1
0	NA	NA	NA	NA	NA	AC002069.2
0	NA	NA	NA	NA	NA	AC002070.1
0.495396	0.0173099	0.0433281	0.403052	0.68691	NA	AC002074.1
0	NA	NA	NA	NA	NA	AC002074.2
0	NA	NA	NA	NA	NA	AC002075.1
1.04353	0.000497919	0.0619309	0.00789869	0.993698	NA	AC002075.2
0.12937	-0.00534709	0.0312767	-0.170961	0.864254	NA	AC002076.1
0	NA	NA	NA	NA	NA	AC002076.2
0.179667	0.00939687	0.0312767	0.300443	0.763839	NA	AC002090.1
1.8642	-0.0302584	0.0789455	-0.389937	0.696583	NA	AC002091.1
3.32563	-0.00813508	0.106524	-0.0760832	0.939353	NA	AC002091.2
0	NA	NA	NA	NA	NA	AC002094.1
0	NA	NA	NA	NA	NA	AC002094.2
0	NA	NA	NA	NA	NA	AC002094.3
0.740207	-0.0037832	0.05368	-0.0693972	0.944673	NA	AC002094.4
4.04471	-0.0647498	0.114216	-0.568218	0.569887	NA	AC002094.5
0	NA	NA	NA	NA	NA	AC002101.1
0	NA	NA	NA	NA	NA	AC002115.1
0	NA	NA	NA	NA	NA	AC002116.1
4.17365	-0.0676538	0.113615	-0.602903	0.546573	NA	AC002116.2
0	NA	NA	NA	NA	NA	AC002127.1
0	NA	NA	NA	NA	NA	AC002127.2
11.6648	0.0519659	0.157081	0.33284	0.739255	0.930259	AC002128.1
12.378	0.0873726	0.150742	0.584841	0.558655	0.863048	AC002128.2
0.18636	0.00939687	0.0312767	0.300443	0.763839	NA	AC002306.1
11.709	0.0158454	0.152776	0.103514	0.917555	0.982445	AC002310.1
0	NA	NA	NA	NA	NA	AC002310.2
3.74632	-0.00765738	0.10829	-0.0708215	0.94354	NA	AC002310.3
0	NA	NA	NA	NA	NA	AC002310.4
0	NA	NA	NA	NA	NA	AC002310.5
14.7759	0.0228372	0.163967	0.139046	0.889414	0.974544	AC002310.6
1.01815	0.00749042	0.0628046	0.120308	0.904239	NA	AC002347.1
0.778292	-0.035919	0.054926	-0.689535	0.490487	NA	AC002347.2
6.70079	0.0454692	0.127952	0.358844	0.719712	NA	AC002350.1
2.79451	-0.0194504	0.0931864	-0.209766	0.83385	NA	AC002351.1
0	NA	NA	NA	NA	NA	AC002366.1
0.64223	-0.0222486	0.0476882	-0.466001	0.641215	NA	AC002367.1
0.315729	0.00249481	0.0346852	0.0719272	0.94266	NA	AC002368.1
0	NA	NA	NA	NA	NA	AC002375.1
0.12937	-0.00534709	0.0312767	-0.170961	0.864254	NA	AC002378.1
0	NA	NA	NA	NA	NA	AC002381.1
0	NA	NA	NA	NA	NA	AC002383.1
0	NA	NA	NA	NA	NA	AC002386.1
0	NA	NA	NA	NA	NA	AC002395.1
1.14035	0.0551933	0.0597865	1.1335	0.257005	NA	AC002398.1
0	NA	NA	NA	NA	NA	AC002398.2
1.10747	0.0535726	0.0592606	1.10716	0.268224	NA	AC002400.1
0.18636	0.00939687	0.0312767	0.300443	0.763839	NA	AC002401.1
0.356281	0.0191224	0.0333813	0.556216	0.578063	NA	AC002401.2
0.567776	-0.0159543	0.0427039	-0.352932	0.72414	NA	AC002401.3
0.12366	-0.00534709	0.0312767	-0.170961	0.864254	NA	AC002401.4
54.1916	0.112767	0.17876	0.631687	0.527592	0.846328	AC002407.1
0.215243	-0.00534709	0.0312767	-0.170961	0.864254	NA	AC002428.1
0.303327	0.00242231	0.0341822	0.0708645	0.943506	NA	AC002428.2
0	NA	NA	NA	NA	NA	AC002429.1
2.35352	0.0983681	0.0850478	1.24493	0.213157	NA	AC002429.2
0.18636	0.00939687	0.0312767	0.300443	0.763839	NA	AC002451.1
0	NA	NA	NA	NA	NA	AC002451.2
4.41506	-0.00754654	0.107112	-0.0698119	0.944343	NA	AC002454.1
1.47544	-0.0657293	0.0740895	-0.919359	0.357908	NA	AC002456.1
0	NA	NA	NA	NA	NA	AC002456.2
0	NA	NA	NA	NA	NA	AC002460.1
0.178141	0.00939687	0.0312767	0.300443	0.763839	NA	AC002463.1
0	NA	NA	NA	NA	NA	AC002464.1
0	NA	NA	NA	NA	NA	AC002465.1
15.7305	-0.0578808	0.16669	-0.345845	0.729459	0.927013	AC002467.1
0.82859	-0.00767783	0.0554953	-0.139629	0.888953	NA	AC002470.1
0	NA	NA	NA	NA	NA	AC002470.2
0	NA	NA	NA	NA	NA	AC002472.1
0	NA	NA	NA	NA	NA	AC002472.2
0.178141	0.00939687	0.0312767	0.300443	0.763839	NA	AC002472.3
0	NA	NA	NA	NA	NA	AC002472.4
0	NA	NA	NA	NA	NA	AC002477.1
3.27341	-0.0835029	0.101158	-0.838763	0.401602	NA	AC002480.1
1.36269	-0.0495619	0.0659094	-0.776873	0.437234	NA	AC002480.2
0	NA	NA	NA	NA	NA	AC002485.1
0	NA	NA	NA	NA	NA	AC002486.1
0.12937	-0.00534709	0.0312767	-0.170961	0.864254	NA	AC002486.2
0	NA	NA	NA	NA	NA	AC002487.1
0	NA	NA	NA	NA	NA	AC002504.1
0	NA	NA	NA	NA	NA	AC002511.1
0	NA	NA	NA	NA	NA	AC002511.2
2.10594	0.103595	0.0864886	1.25477	0.209563	NA	AC002519.1
0.253029	-0.0133246	0.0320067	-0.365779	0.71453	NA	AC002519.2
29.3865	0.0847299	0.177518	0.475797	0.634219	0.892233	AC002524.1
1.92362	0.0860465	0.0820453	1.09472	0.273637	NA	AC002525.1
0	NA	NA	NA	NA	NA	AC002539.2
0	NA	NA	NA	NA	NA	AC002540.1
0.12937	-0.00534709	0.0312767	-0.170961	0.864254	NA	AC002542.1
0.258739	-0.012719	0.0312767	-0.362432	0.717029	NA	AC002543.1
6.55489	-0.109537	0.134342	-0.820157	0.412126	NA	AC002545.1
0	NA	NA	NA	NA	NA	AC002546.1
2.55501	0.0271578	0.0946203	0.28546	0.775291	NA	AC002550.1
10.4565	0.0181066	0.148043	0.121777	0.903075	0.977973	AC002550.2
0	NA	NA	NA	NA	NA	AC002551.1
10.4276	-0.0830848	0.152841	-0.546571	0.584674	0.874178	AC002553.1
6.31246	0.0548367	0.120396	0.454884	0.649192	NA	AC002553.2
1.5474	0.0479938	0.0712138	0.695474	0.486758	NA	AC002558.1
0.12937	-0.00534709	0.0312767	-0.170961	0.864254	NA	AC002558.2
4.71941	0.0272817	0.107172	0.256086	0.797884	NA	AC002558.3
1.893	0.0269803	0.0836643	0.32685	0.743781	NA	AC002563.1
0	NA	NA	NA	NA	NA	AC002978.1
0	NA	NA	NA	NA	NA	AC002979.1
0	NA	NA	NA	NA	NA	AC002981.1
0	NA	NA	NA	NA	NA	AC002984.1
0	NA	NA	NA	NA	NA	AC002985.1
0	NA	NA	NA	NA	NA	AC002992.1
0	NA	NA	NA	NA	NA	AC002994.1
0	NA	NA	NA	NA	NA	AC002996.1
0.12937	-0.00534709	0.0312767	-0.170961	0.864254	NA	AC003001.1
0.12366	-0.00534709	0.0312767	-0.170961	0.864254	NA	AC003001.2
0	NA	NA	NA	NA	NA	AC003002.1
0.43117	-0.00751131	0.0415624	-0.163129	0.870417	NA	AC003002.2
0.12937	-0.00534709	0.0312767	-0.170961	0.864254	NA	AC003002.3
0	NA	NA	NA	NA	NA	AC003005.1
0.863866	-0.0148483	0.0575437	-0.255849	0.798067	NA	AC003005.2
0	NA	NA	NA	NA	NA	AC003006.1
0	NA	NA	NA	NA	NA	AC003009.1
0	NA	NA	NA	NA	NA	AC003029.1
0	NA	NA	NA	NA	NA	AC003035.1
0.357808	0.0225972	0.0362586	0.608208	0.54305	NA	AC003035.2
0.12937	-0.00534709	0.0312767	-0.170961	0.864254	NA	AC003043.1
0.12366	-0.00534709	0.0312767	-0.170961	0.864254	NA	AC003043.2
0	NA	NA	NA	NA	NA	AC003045.1
0	NA	NA	NA	NA	NA	AC003070.1
0	NA	NA	NA	NA	NA	AC003070.2
0	NA	NA	NA	NA	NA	AC003071.1
0	NA	NA	NA	NA	NA	AC003071.2
1.72825	0.0106568	0.0775191	0.139216	0.889279	NA	AC003072.1
0.178141	0.00939687	0.0312767	0.300443	0.763839	NA	AC003079.1
0.338903	-0.0163508	0.0354228	-0.486864	0.626355	NA	AC003080.1
0	NA	NA	NA	NA	NA	AC003084.1
0	NA	NA	NA	NA	NA	AC003087.1
0	NA	NA	NA	NA	NA	AC003092.1
0	NA	NA	NA	NA	NA	AC003092.2
0	NA	NA	NA	NA	NA	AC003098.1
0	NA	NA	NA	NA	NA	AC003101.1
0.215243	-0.00534709	0.0312767	-0.170961	0.864254	NA	AC003101.2
0	NA	NA	NA	NA	NA	AC003101.3
25.1726	0.43715	0.174082	2.51316	0.0119656	0.119985	AC003102.1
0	NA	NA	NA	NA	NA	AC003658.1
0.3645	0.0228702	0.0364747	0.618768	0.536069	NA	AC003659.1
0	NA	NA	NA	NA	NA	AC003666.1
0	NA	NA	NA	NA	NA	AC003669.1
46.1247	0.295603	0.178632	1.66263	0.0963871	0.415077	AC003681.1
1.00418	0.0307262	0.0531808	0.583749	0.559389	NA	AC003682.1
0	NA	NA	NA	NA	NA	AC003684.1
0	NA	NA	NA	NA	NA	AC003685.1
0.18636	0.00939687	0.0312767	0.300443	0.763839	NA	AC003685.2
0	NA	NA	NA	NA	NA	AC003686.1
0	NA	NA	NA	NA	NA	AC003687.1
0	NA	NA	NA	NA	NA	AC003688.1
0.12937	-0.00534709	0.0312767	-0.170961	0.864254	NA	AC003688.2
0	NA	NA	NA	NA	NA	AC003950.1
2.37043	0.0386478	0.0859406	0.455124	0.64902	NA	AC003956.1
0.18636	0.00939687	0.0312767	0.300443	0.763839	NA	AC003957.1
0	NA	NA	NA	NA	NA	AC003958.1
0	NA	NA	NA	NA	NA	AC003958.2
0.691436	-0.0278256	0.0496814	-0.566394	0.571126	NA	AC003965.1
0	NA	NA	NA	NA	NA	AC003965.2
0.303327	0.00242231	0.0341822	0.0708645	0.943506	NA	AC003968.1
0	NA	NA	NA	NA	NA	AC003973.1
0	NA	NA	NA	NA	NA	AC003973.2
0	NA	NA	NA	NA	NA	AC003973.3
2.16141	-0.0333551	0.08581	-0.385567	0.699817	NA	AC003975.1
0	NA	NA	NA	NA	NA	AC003982.1
0	NA	NA	NA	NA	NA	AC003984.1
0	NA	NA	NA	NA	NA	AC003985.1
0	NA	NA	NA	NA	NA	AC003985.2
0	NA	NA	NA	NA	NA	AC003986.1
0	NA	NA	NA	NA	NA	AC003986.2
0	NA	NA	NA	NA	NA	AC003986.3
0	NA	NA	NA	NA	NA	AC003988.1
0	NA	NA	NA	NA	NA	AC003989.1
0	NA	NA	NA	NA	NA	AC003989.2
0.18636	0.00939687	0.0312767	0.300443	0.763839	NA	AC003991.1
0.366027	0.0229319	0.0365234	0.621178	0.534482	NA	AC003991.2
0	NA	NA	NA	NA	NA	AC003992.1
0.545694	0.0396886	0.0422057	0.923421	0.355788	NA	AC004000.1
0	NA	NA	NA	NA	NA	AC004004.1
0	NA	NA	NA	NA	NA	AC004006.1
0	NA	NA	NA	NA	NA	AC004009.1
0	NA	NA	NA	NA	NA	AC004009.2
0	NA	NA	NA	NA	NA	AC004009.3
0.12366	-0.00534709	0.0312767	-0.170961	0.864254	NA	AC004012.1
0	NA	NA	NA	NA	NA	AC004014.1
0	NA	NA	NA	NA	NA	AC004014.2
0	NA	NA	NA	NA	NA	AC004016.1
3.94163	-4.45258e-05	0.112091	-0.000395158	0.999685	NA	AC004017.1
0	NA	NA	NA	NA	NA	AC004019.18
0	NA	NA	NA	NA	NA	AC004022.1
0	NA	NA	NA	NA	NA	AC004022.2
0.557339	-0.0147374	0.0424565	-0.332857	0.739242	NA	AC004023.1
0.43688	-0.00682701	0.0389209	-0.157523	0.874833	NA	AC004024.1
1.75112	0.00364102	0.0815611	0.0444381	0.964555	NA	AC004034.1
1.39835	0.0996403	0.0709547	1.54985	0.121177	NA	AC004039.1
0	NA	NA	NA	NA	NA	AC004052.1
0.12937	-0.00534709	0.0312767	-0.170961	0.864254	NA	AC004053.1
0	NA	NA	NA	NA	NA	AC004054.1
0.12366	-0.00534709	0.0312767	-0.170961	0.864254	NA	AC004057.1
0	NA	NA	NA	NA	NA	AC004062.1
0	NA	NA	NA	NA	NA	AC004063.1
6.04742	0.0921049	0.131953	0.697711	0.485358	NA	AC004066.1
0	NA	NA	NA	NA	NA	AC004066.2
4.29734	0.0356326	0.113945	0.31625	0.751813	NA	AC004067.1
0.178141	0.00939687	0.0312767	0.300443	0.763839	NA	AC004069.1
0	NA	NA	NA	NA	NA	AC004069.2
0	NA	NA	NA	NA	NA	AC004074.1
0.989566	0.0106959	0.0521241	0.214893	0.829851	NA	AC004076.1
23.1761	0.125095	0.173224	0.723314	0.469487	0.818164	AC004076.2
0	NA	NA	NA	NA	NA	AC004079.1
0	NA	NA	NA	NA	NA	AC004080.1
0	NA	NA	NA	NA	NA	AC004080.2
0	NA	NA	NA	NA	NA	AC004080.3
0	NA	NA	NA	NA	NA	AC004080.4
0	NA	NA	NA	NA	NA	AC004080.5
0	NA	NA	NA	NA	NA	AC004080.6
3.10805	0.108331	0.102775	1.08026	0.280025	NA	AC004112.1
0.179667	0.00939687	0.0312767	0.300443	0.763839	NA	AC004129.1
0	NA	NA	NA	NA	NA	AC004129.2
0	NA	NA	NA	NA	NA	AC004129.3
3.39806	0.0389497	0.0993889	0.387209	0.698602	NA	AC004130.1
0.179667	0.00939687	0.0312767	0.300443	0.763839	NA	AC004134.1
0.652123	-0.0230213	0.0479365	-0.479674	0.631459	NA	AC004147.1
18.2497	-0.0338262	0.168204	-0.200069	0.841427	0.960172	AC004147.2
0	NA	NA	NA	NA	NA	AC004147.3
0	NA	NA	NA	NA	NA	AC004147.4
0.215243	-0.00534709	0.0312767	-0.170961	0.864254	NA	AC004147.5
0.344613	-0.0165286	0.0356131	-0.496196	0.619756	NA	AC004148.1
108.782	-0.104222	0.165463	-0.62995	0.528727	0.846712	AC004148.2
0.3018	0.00241329	0.0341192	0.0707313	0.943612	NA	AC004156.1
2.50351	0.0803512	0.0841513	1.00771	0.313595	NA	AC004158.1
1.15766	0.0459908	0.0602171	0.78321	0.433504	NA	AC004160.1
0.178141	0.00939687	0.0312767	0.300443	0.763839	NA	AC004160.2
0	NA	NA	NA	NA	NA	AC004217.1
0	NA	NA	NA	NA	NA	AC004217.2
1.96065	-0.0128806	0.0854689	-0.151278	0.879757	NA	AC004221.1
0	NA	NA	NA	NA	NA	AC004223.1
0.178141	0.00939687	0.0312767	0.300443	0.763839	NA	AC004223.2
0.43368	-0.00624026	0.0388403	-0.144482	0.88512	NA	AC004223.3
0	NA	NA	NA	NA	NA	AC004224.1
0	NA	NA	NA	NA	NA	AC004224.2
0	NA	NA	NA	NA	NA	AC004231.1
0	NA	NA	NA	NA	NA	AC004231.3
0	NA	NA	NA	NA	NA	AC004232.1
0	NA	NA	NA	NA	NA	AC004232.2
3.4451	-0.0187028	0.108152	-0.1722	0.86328	NA	AC004232.3
1.08012	0.0893364	0.0607047	1.72089	0.0852716	NA	AC004233.1
10.6112	-0.0699836	0.151514	-0.463503	0.643004	0.896216	AC004233.2
28.5467	-0.199857	0.178685	-1.11738	0.263831	0.665716	AC004233.3
1.3362	0.0715932	0.0702932	1.04924	0.294066	NA	AC004233.4
2.54338	-0.0343933	0.0927983	-0.368751	0.712313	NA	AC004241.1
0	NA	NA	NA	NA	NA	AC004241.2
7.85758	-0.10532	0.137953	-0.771644	0.440325	NA	AC004241.3
2.42868	-0.111323	0.0921104	-1.26054	0.207476	NA	AC004241.4
0.721302	-0.0596376	0.0513134	-1.16985	0.242062	NA	AC004241.5
7.7319	-0.050398	0.138468	-0.365787	0.714524	NA	AC004253.1
0	NA	NA	NA	NA	NA	AC004253.2
0.178141	0.00939687	0.0312767	0.300443	0.763839	NA	AC004257.1
5.09367	-0.0509054	0.116891	-0.438359	0.661126	NA	AC004263.1
1.27216	-0.015738	0.069691	-0.226638	0.820705	NA	AC004264.1
0.253029	-0.0133246	0.0320067	-0.365779	0.71453	NA	AC004264.2
0.179667	0.00939687	0.0312767	0.300443	0.763839	NA	AC004381.1
0	NA	NA	NA	NA	NA	AC004381.2
0	NA	NA	NA	NA	NA	AC004381.3
4.96669	0.0679411	0.121222	0.566884	0.570793	NA	AC004383.1
2.64965	0.0233226	0.0973716	0.240209	0.810168	NA	AC004386.1
0	NA	NA	NA	NA	NA	AC004386.2
0	NA	NA	NA	NA	NA	AC004408.1
0	NA	NA	NA	NA	NA	AC004408.2
0	NA	NA	NA	NA	NA	AC004415.1
0	NA	NA	NA	NA	NA	AC004448.1
0.983557	0.0427985	0.0627243	0.681028	0.495854	NA	AC004448.2
0	NA	NA	NA	NA	NA	AC004448.3
0.662661	0.0290123	0.0451861	0.620407	0.53499	NA	AC004449.1
11.1074	0.0824801	0.156914	0.525473	0.599254	0.881169	AC004453.1
0.757884	0.0288144	0.0509171	0.695125	0.486977	NA	AC004453.2
0	NA	NA	NA	NA	NA	AC004458.1
0.18636	0.00939687	0.0312767	0.300443	0.763839	NA	AC004460.1
0.401603	0.00294765	0.0376692	0.078251	0.937628	NA	AC004461.1
4.04304	-0.0914016	0.114636	-0.8072	0.419551	NA	AC004461.2
0.648923	-0.0219223	0.0478839	-0.467457	0.640173	NA	AC004466.1
2.7452	-0.0482978	0.0981903	-0.495935	0.61994	NA	AC004466.2
0.846702	-0.007282	0.0530285	-0.139125	0.889351	NA	AC004466.3
0.12366	-0.00534709	0.0312767	-0.170961	0.864254	NA	AC004467.1
0.43368	-0.00624026	0.0388403	-0.144482	0.88512	NA	AC004470.1
1.63579	0.0486231	0.0754741	0.67371	0.500496	NA	AC004471.1
1.57497	0.11076	0.0736216	1.68453	0.0920788	NA	AC004471.2
9.21764	0.0373297	0.149844	0.248762	0.803545	NA	AC004477.1
0	NA	NA	NA	NA	NA	AC004477.2
9.29214	0.0321632	0.146102	0.220172	0.825737	NA	AC004477.3
1.63579	0.0486231	0.0754741	0.67371	0.500496	NA	AC004485.1
0.12366	-0.00534709	0.0312767	-0.170961	0.864254	NA	AC004486.1
1.09875	-0.0295288	0.0618056	-0.487993	0.625555	NA	AC004490.1
3.07029	0.0976634	0.0991556	0.987737	0.323281	NA	AC004491.1
5.19408	0.0244932	0.125407	0.196374	0.844318	NA	AC004492.1
0.8096	0.0216213	0.0524273	0.402001	0.687683	NA	AC004494.1
0	NA	NA	NA	NA	NA	AC004494.2
0	NA	NA	NA	NA	NA	AC004520.1
0	NA	NA	NA	NA	NA	AC004522.1
3.49555	0.00618707	0.105867	0.058172	0.953612	NA	AC004522.2
0	NA	NA	NA	NA	NA	AC004528.1
0	NA	NA	NA	NA	NA	AC004528.2
7.24234	-0.0330194	0.13612	-0.241054	0.809513	NA	AC004540.1
3.5566	0.155757	0.108166	1.47448	0.140353	NA	AC004540.2
0	NA	NA	NA	NA	NA	AC004542.1
0	NA	NA	NA	NA	NA	AC004542.2
0.445099	-0.00691735	0.0391701	-0.158659	0.873938	NA	AC004543.1
0	NA	NA	NA	NA	NA	AC004551.1
0.539001	0.0334668	0.0389015	0.841047	0.400321	NA	AC004552.1
0.309037	0.00245584	0.0344158	0.071358	0.943113	NA	AC004554.1
1.40656	-0.0445132	0.0650071	-0.722433	0.470028	NA	AC004554.2
0.7469	-0.00340898	0.0538204	-0.0624965	0.950167	NA	AC004584.1
0.315729	0.00249481	0.0346852	0.0719272	0.94266	NA	AC004584.2
0	NA	NA	NA	NA	NA	AC004584.3
0	NA	NA	NA	NA	NA	AC004585.1
0	NA	NA	NA	NA	NA	AC004585.2
0	NA	NA	NA	NA	NA	AC004590.1
0.12366	-0.00534709	0.0312767	-0.170961	0.864254	NA	AC004593.1
0	NA	NA	NA	NA	NA	AC004593.2
2.81811	0.105636	0.0983025	1.11151	0.266351	NA	AC004594.1
0	NA	NA	NA	NA	NA	AC004595.1
1.70093	0.00990148	0.0772775	0.129335	0.897093	NA	AC004596.1
0	NA	NA	NA	NA	NA	AC004597.1
4.8208	0.140992	0.120457	1.19202	0.233255	NA	AC004623.1
0.794687	0.020831	0.0521169	0.387743	0.698206	NA	AC004637.1
0	NA	NA	NA	NA	NA	AC004655.1
430.496	0.416315	0.130573	3.18883	0.0014285	0.0270217	AC004656.1
0.215243	-0.00534709	0.0312767	-0.170961	0.864254	NA	AC004672.1
0	NA	NA	NA	NA	NA	AC004672.2
0	NA	NA	NA	NA	NA	AC004673.1
0	NA	NA	NA	NA	NA	AC004674.1
2.03333	-0.0743669	0.0835227	-0.925601	0.354653	NA	AC004678.1
2.63419	0.0232257	0.0973166	0.239069	0.811052	NA	AC004678.2
1.0545	-0.0831029	0.0601227	-1.56658	0.117213	NA	AC004687.1
1.39011	-0.0257484	0.0713535	-0.36289	0.716687	NA	AC004687.2
0	NA	NA	NA	NA	NA	AC004690.1
0.356281	0.0191224	0.0333813	0.556216	0.578063	NA	AC004690.2
0.608627	-0.0133008	0.0429024	-0.354527	0.722944	NA	AC004691.1
0	NA	NA	NA	NA	NA	AC004691.2
0	NA	NA	NA	NA	NA	AC004692.1
0.75941	0.0325094	0.0536226	0.73448	0.462656	NA	AC004692.2
1.28437	0.0447693	0.070339	0.636903	0.524188	NA	AC004696.1
0.481467	0.0174275	0.0429685	0.39101	0.69579	NA	AC004696.2
0	NA	NA	NA	NA	NA	AC004699.1
0	NA	NA	NA	NA	NA	AC004702.1
0.178141	0.00939687	0.0312767	0.300443	0.763839	NA	AC004704.1
6.38043	0.0938107	0.1333	0.708164	0.478843	NA	AC004706.1
0	NA	NA	NA	NA	NA	AC004706.2
76.9343	-0.0427675	0.169695	-0.252131	0.80094	0.947425	AC004706.3
0.356281	0.0191224	0.0333813	0.556216	0.578063	NA	AC004707.1
0	NA	NA	NA	NA	NA	AC004745.1
0.215243	-0.00534709	0.0312767	-0.170961	0.864254	NA	AC004754.1
1.10052	0.0293315	0.0658287	0.441653	0.65874	NA	AC004765.1
0	NA	NA	NA	NA	NA	AC004769.1
2.60277	-0.0651147	0.0934497	-0.704591	0.481065	NA	AC004771.1
0.12937	-0.00534709	0.0312767	-0.170961	0.864254	NA	AC004771.2
5.48747	0.078563	0.126132	0.625528	0.531625	NA	AC004771.3
0	NA	NA	NA	NA	NA	AC004771.4
2.24233	0.0245017	0.0914134	0.266726	0.789681	NA	AC004771.5
0	NA	NA	NA	NA	NA	AC004775.1
0.24732	-0.012719	0.0312767	-0.351394	0.725293	NA	AC004777.1
0	NA	NA	NA	NA	NA	AC004784.1
0	NA	NA	NA	NA	NA	AC004790.1
0	NA	NA	NA	NA	NA	AC004790.2
7.28597	-0.165195	0.139083	-1.19324	0.232775	NA	AC004801.1
8.83665	-0.0565231	0.147484	-0.384581	0.700548	NA	AC004801.2
0.356281	0.0191224	0.0333813	0.556216	0.578063	NA	AC004801.3
0	NA	NA	NA	NA	NA	AC004801.4
0	NA	NA	NA	NA	NA	AC004801.5
2.6108	-0.0108667	0.095819	-0.112452	0.910465	NA	AC004801.6
1.41121	-0.0890544	0.0712922	-1.40154	0.161052	NA	AC004801.7
16.7636	0.28064	0.159693	1.76782	0.0770906	0.370045	AC004803.1
0	NA	NA	NA	NA	NA	AC004805.1
0	NA	NA	NA	NA	NA	AC004805.2
0	NA	NA	NA	NA	NA	AC004805.3
0	NA	NA	NA	NA	NA	AC004808.1
0	NA	NA	NA	NA	NA	AC004808.2
0	NA	NA	NA	NA	NA	AC004812.1
27.2926	-0.0902526	0.178384	-0.505757	0.613027	0.886309	AC004812.2
49.3558	0.113636	0.178507	0.635141	0.525336	0.844719	AC004816.1
1.72235	0.0693154	0.0781113	0.919179	0.358002	NA	AC004816.2
0	NA	NA	NA	NA	NA	AC004817.1
0.178141	0.00939687	0.0312767	0.300443	0.763839	NA	AC004817.2
0.179667	0.00939687	0.0312767	0.300443	0.763839	NA	AC004817.3
0.178141	0.00939687	0.0312767	0.300443	0.763839	NA	AC004817.4
0	NA	NA	NA	NA	NA	AC004824.1
0	NA	NA	NA	NA	NA	AC004824.2
0	NA	NA	NA	NA	NA	AC004825.1
6.42371	0.0499044	0.130612	0.378984	0.7047	NA	AC004825.2
0	NA	NA	NA	NA	NA	AC004828.1
14.7711	0.324881	0.160528	2.06301	0.0391117	0.250845	AC004830.1
0	NA	NA	NA	NA	NA	AC004832.1
0	NA	NA	NA	NA	NA	AC004832.2
0	NA	NA	NA	NA	NA	AC004832.3
0.689225	-0.0484875	0.0463419	-1.02234	0.30662	NA	AC004832.4
0.12366	-0.00534709	0.0312767	-0.170961	0.864254	NA	AC004832.5
0.12937	-0.00534709	0.0312767	-0.170961	0.864254	NA	AC004832.6
2.54537	0.0580006	0.0921483	0.638737	0.522994	NA	AC004834.1
1.34879	0.00952009	0.0625627	0.153152	0.878279	NA	AC004835.1
0	NA	NA	NA	NA	NA	AC004835.2
0.30751	0.00244691	0.0343537	0.0712268	0.943217	NA	AC004836.1
0	NA	NA	NA	NA	NA	AC004837.1
2.9737	0.0585113	0.098651	0.605	0.545179	NA	AC004837.2
0	NA	NA	NA	NA	NA	AC004837.3
1.01091	0.00780641	0.0626909	0.125439	0.900176	NA	AC004839.1
1.22616	-0.00926564	0.0673279	-0.140039	0.888629	NA	AC004840.1
0	NA	NA	NA	NA	NA	AC004840.2
7.61519	0.234309	0.136933	1.74843	0.0803903	NA	AC004846.1
7.50594	0.201205	0.139167	1.47572	0.140019	NA	AC004846.2
0.18636	0.00939687	0.0312767	0.300443	0.763839	NA	AC004847.1
0.178141	0.00939687	0.0312767	0.300443	0.763839	NA	AC004851.1
0	NA	NA	NA	NA	NA	AC004852.1
0	NA	NA	NA	NA	NA	AC004852.2
0	NA	NA	NA	NA	NA	AC004852.3
0	NA	NA	NA	NA	NA	AC004853.1
0	NA	NA	NA	NA	NA	AC004854.1
1.51211	-0.0642353	0.0740006	-0.909369	0.363155	NA	AC004854.2
0.18636	0.00939687	0.0312767	0.300443	0.763839	NA	AC004858.1
0	NA	NA	NA	NA	NA	AC004862.1
0	NA	NA	NA	NA	NA	AC004865.1
0.401603	0.00294765	0.0376692	0.078251	0.937628	NA	AC004865.2
0	NA	NA	NA	NA	NA	AC004866.1
0	NA	NA	NA	NA	NA	AC004866.2
0	NA	NA	NA	NA	NA	AC004869.1
0	NA	NA	NA	NA	NA	AC004869.2
0	NA	NA	NA	NA	NA	AC004870.1
0	NA	NA	NA	NA	NA	AC004870.2
0	NA	NA	NA	NA	NA	AC004870.3
0	NA	NA	NA	NA	NA	AC004870.4
0	NA	NA	NA	NA	NA	AC004872.1
0.215243	-0.00534709	0.0312767	-0.170961	0.864254	NA	AC004875.1
0.3645	0.0228702	0.0364747	0.618768	0.536069	NA	AC004877.1
0.432696	-0.00752897	0.041609	-0.163343	0.870248	NA	AC004877.2
0	NA	NA	NA	NA	NA	AC004878.3
0	NA	NA	NA	NA	NA	AC004878.5
0	NA	NA	NA	NA	NA	AC004878.6
0	NA	NA	NA	NA	NA	AC004878.7
0	NA	NA	NA	NA	NA	AC004882.1
0	NA	NA	NA	NA	NA	AC004882.2
1.18462	-0.0347236	0.0639283	-0.561789	0.57426	NA	AC004884.1
0.401603	0.00294765	0.0376692	0.078251	0.937628	NA	AC004884.2
0.552387	0.0400426	0.0423646	0.932243	0.351211	NA	AC004888.1
18.8864	-0.179446	0.170512	-1.05186	0.292863	0.691405	AC004889.1
9.64486	-0.133281	0.144729	-0.91993	0.357609	NA	AC004890.1
19.5843	0.234844	0.165363	1.43833	0.150339	0.512593	AC004890.2
0.863183	-0.041326	0.0566534	-0.776535	0.437433	NA	AC004890.3
1.41001	0.00512007	0.0678119	0.0767357	0.938834	NA	AC004893.1
0	NA	NA	NA	NA	NA	AC004893.2
0.544167	0.0452208	0.0449341	0.987636	0.323331	NA	AC004895.1
1.83798	-0.000439329	0.0797106	-0.00554476	0.995576	NA	AC004898.1
0.303327	0.00242231	0.0341822	0.0708645	0.943506	NA	AC004899.1
0	NA	NA	NA	NA	NA	AC004899.2
0.680016	-0.0271444	0.0493964	-0.553329	0.580038	NA	AC004900.1
0.178141	0.00939687	0.0312767	0.300443	0.763839	NA	AC004906.1
0.976321	0.0358327	0.0570011	0.628227	0.529855	NA	AC004908.1
3.22873	-0.00100639	0.0959288	-0.0103966	0.991705	NA	AC004908.2
0.37272	0.0197337	0.0339059	0.581011	0.561233	NA	AC004908.3
0	NA	NA	NA	NA	NA	AC004910.1
0	NA	NA	NA	NA	NA	AC004911.1
0	NA	NA	NA	NA	NA	AC004917.1
5.54654	0.0443417	0.114407	0.392315	0.694825	NA	AC004918.1
29.4651	0.16246	0.17828	0.90909	0.363303	0.750407	AC004918.3
0	NA	NA	NA	NA	NA	AC004920.1
0.179667	0.00939687	0.0312767	0.300443	0.763839	NA	AC004921.1
0.30751	0.00244691	0.0343537	0.0712268	0.943217	NA	AC004922.1
3.05218	0.0983549	0.0991234	0.993724	0.320357	NA	AC004923.1
0	NA	NA	NA	NA	NA	AC004923.2
0	NA	NA	NA	NA	NA	AC004923.3
4.18025	0.00783856	0.11287	0.0688033	0.945146	NA	AC004923.4
0	NA	NA	NA	NA	NA	AC004924.1
1.59262	-0.0112757	0.0738695	-0.152679	0.878651	NA	AC004925.1
0	NA	NA	NA	NA	NA	AC004930.1
0	NA	NA	NA	NA	NA	AC004936.1
0	NA	NA	NA	NA	NA	AC004938.1
0.215243	-0.00534709	0.0312767	-0.170961	0.864254	NA	AC004941.1
0	NA	NA	NA	NA	NA	AC004941.2
14.0103	-0.0412578	0.16254	-0.253037	0.800239	0.947286	AC004943.1
48.3329	-0.0144966	0.17754	-0.0816369	0.934935	0.985883	AC004943.2
0.344613	-0.0165286	0.0356131	-0.496196	0.619756	NA	AC004943.3
0	NA	NA	NA	NA	NA	AC004944.1
0	NA	NA	NA	NA	NA	AC004945.1
0	NA	NA	NA	NA	NA	AC004946.1
0	NA	NA	NA	NA	NA	AC004947.1
0.338903	-0.0163508	0.0354228	-0.486864	0.626355	NA	AC004948.1
0	NA	NA	NA	NA	NA	AC004949.1
1.65314	-0.0170375	0.079414	-0.216243	0.828798	NA	AC004951.1
3.20405	0.0093529	0.0986155	0.096534	0.923096	NA	AC004951.2
0	NA	NA	NA	NA	NA	AC004951.3
1.01495	0.00795781	0.0600904	0.133535	0.89377	NA	AC004951.4
0	NA	NA	NA	NA	NA	AC004965.1
5.73331	0.00722698	0.126746	0.0571162	0.954453	NA	AC004967.1
6.84516	-0.0142371	0.132751	-0.108273	0.913779	NA	AC004967.2
0.31002	0.00246159	0.0344557	0.0714422	0.943046	NA	AC004969.1
0	NA	NA	NA	NA	NA	AC004972.1
0.18636	0.00939687	0.0312767	0.300443	0.763839	NA	AC004973.1
0.178141	0.00939687	0.0312767	0.300443	0.763839	NA	AC004974.1
2.41178	0.100535	0.0891638	1.1684	0.242646	NA	AC004975.1
0	NA	NA	NA	NA	NA	AC004975.2
18.3212	-0.104685	0.171146	-0.613182	0.539756	0.853736	AC004980.1
0.43368	-0.00624026	0.0388403	-0.144482	0.88512	NA	AC004980.2
0	NA	NA	NA	NA	NA	AC004980.3
0	NA	NA	NA	NA	NA	AC004980.4
6.4471	0.0514321	0.128302	0.399741	0.689347	NA	AC004982.1
17.8109	0.187694	0.170862	1.10077	0.270997	0.672048	AC004982.2
0.215243	-0.00534709	0.0312767	-0.170961	0.864254	NA	AC004986.1
0.18636	0.00939687	0.0312767	0.300443	0.763839	NA	AC004987.1
148.477	-0.212116	0.151864	-1.39588	0.16275	0.530379	AC004987.2
0	NA	NA	NA	NA	NA	AC004987.3
0	NA	NA	NA	NA	NA	AC004987.4
0.747443	-0.00292508	0.0476069	-0.0606948	0.951602	NA	AC004988.1
3.9561	-0.000560775	0.111901	-0.00498848	0.99602	NA	AC004990.1
0	NA	NA	NA	NA	NA	AC004994.1
0.18636	0.00939687	0.0312767	0.300443	0.763839	NA	AC004997.1
1.53101	-0.00496774	0.0769036	-0.0652891	0.947944	NA	AC005000.1
0	NA	NA	NA	NA	NA	AC005000.2
0.12937	-0.00534709	0.0312767	-0.170961	0.864254	NA	AC005002.1
0	NA	NA	NA	NA	NA	AC005002.2
0.12366	-0.00534709	0.0312767	-0.170961	0.864254	NA	AC005005.1
0	NA	NA	NA	NA	NA	AC005005.2
3.47861	-0.0435889	0.102678	-0.426032	0.670085	NA	AC005005.3
0.645729	-0.0367598	0.0408073	-0.867906	0.385446	NA	AC005005.4
0.680999	-0.0227035	0.0459566	-0.50593	0.612906	NA	AC005006.1
0	NA	NA	NA	NA	NA	AC005008.1
0	NA	NA	NA	NA	NA	AC005008.2
0.215243	-0.00534709	0.0312767	-0.170961	0.864254	NA	AC005009.1
0.315729	0.00249481	0.0346852	0.0719272	0.94266	NA	AC005009.2
0	NA	NA	NA	NA	NA	AC005011.1
0.37272	0.0197337	0.0339059	0.581011	0.561233	NA	AC005013.1
1.60604	-0.014822	0.0731004	-0.200521	0.841073	NA	AC005014.1
1.29031	-0.0186503	0.0661106	-0.279836	0.779603	NA	AC005014.2
0	NA	NA	NA	NA	NA	AC005014.3
0.12366	-0.00534709	0.0312767	-0.170961	0.864254	NA	AC005019.1
0.18636	0.00939687	0.0312767	0.300443	0.763839	NA	AC005019.2
1.32493	0.0653659	0.0673967	1.00315	0.31579	NA	AC005020.1
0	NA	NA	NA	NA	NA	AC005020.2
0.647939	-0.0251404	0.0504941	-0.499462	0.617454	NA	AC005021.1
0	NA	NA	NA	NA	NA	AC005033.1
0	NA	NA	NA	NA	NA	AC005034.1
0.393384	0.00290536	0.037401	0.0776814	0.938081	NA	AC005034.2
133.545	-0.0623413	0.156627	-0.398144	0.690524	0.91433	AC005034.3
0.660342	-0.022615	0.0481748	-0.48146	0.63019	NA	AC005034.4
6.03553	-0.173802	0.12893	-1.37454	0.169273	NA	AC005034.5
0.344613	-0.0165286	0.0356131	-0.496196	0.619756	NA	AC005037.1
0	NA	NA	NA	NA	NA	AC005037.2
0	NA	NA	NA	NA	NA	AC005040.1
0.315729	0.00249481	0.0346852	0.0719272	0.94266	NA	AC005041.1
0	NA	NA	NA	NA	NA	AC005041.2
0	NA	NA	NA	NA	NA	AC005041.3
2.09923	-0.0219985	0.0850721	-0.259924	0.794923	NA	AC005042.1
0	NA	NA	NA	NA	NA	AC005042.2
0	NA	NA	NA	NA	NA	AC005042.3
4.9414	0.124313	0.119616	1.05429	0.291749	NA	AC005046.1
0	NA	NA	NA	NA	NA	AC005048.1
0	NA	NA	NA	NA	NA	AC005050.1
1.95974	0.0555347	0.0839477	0.68257	0.494879	NA	AC005052.1
16.1291	-0.132442	0.162229	-0.813423	0.415976	0.787189	AC005062.1
1.2356	0.0160688	0.068526	0.231263	0.817111	NA	AC005064.1
0	NA	NA	NA	NA	NA	AC005066.1
0	NA	NA	NA	NA	NA	AC005070.1
0.39491	0.00291325	0.0374512	0.077788	0.937997	NA	AC005070.2
10.8557	0.0715424	0.149312	0.479632	0.631489	0.891	AC005070.3
0.481467	0.0174275	0.0429685	0.39101	0.69579	NA	AC005071.1
0.757884	0.0288144	0.0509171	0.695125	0.486977	NA	AC005072.1
20.5856	0.044107	0.174425	0.253005	0.800264	0.947286	AC005076.1
0.68023	0.0336506	0.0488664	0.681134	0.495787	NA	AC005077.1
3.07191	-0.0101286	0.102017	-0.100331	0.920081	NA	AC005077.2
0	NA	NA	NA	NA	NA	AC005077.3
22.9036	-0.0666355	0.171617	-0.388444	0.697687	0.916728	AC005077.4
0	NA	NA	NA	NA	NA	AC005077.9
1.44544	-0.0226981	0.0683546	-0.341545	0.732694	NA	AC005082.1
0	NA	NA	NA	NA	NA	AC005082.2
23.7488	-0.170369	0.175792	-0.968431	0.332829	0.728494	AC005083.1
0	NA	NA	NA	NA	NA	AC005084.1
0.12937	-0.00534709	0.0312767	-0.170961	0.864254	NA	AC005086.1
0	NA	NA	NA	NA	NA	AC005086.2
0.30751	0.00244691	0.0343537	0.0712268	0.943217	NA	AC005086.3
0.18636	0.00939687	0.0312767	0.300443	0.763839	NA	AC005086.4
0	NA	NA	NA	NA	NA	AC005088.1
3.67478	0.0508092	0.10634	0.480809	0.630652	NA	AC005089.1
0	NA	NA	NA	NA	NA	AC005090.1
0.962143	-0.021273	0.0620351	-0.347091	0.728523	NA	AC005091.1
0.179667	0.00939687	0.0312767	0.300443	0.763839	NA	AC005094.1
0.877904	0.0164414	0.0533216	0.317072	0.751189	NA	AC005096.1
0.502089	0.0152545	0.040702	0.38461	0.700526	NA	AC005099.1
0	NA	NA	NA	NA	NA	AC005100.1
0.916821	0.0101918	0.0550179	0.182584	0.855125	NA	AC005102.1
15.0512	-0.00388648	0.152488	-0.0255525	0.979614	0.996384	AC005104.1
0.30751	0.00244691	0.0343537	0.0712268	0.943217	NA	AC005104.2
0.12937	-0.00534709	0.0312767	-0.170961	0.864254	NA	AC005105.1
0	NA	NA	NA	NA	NA	AC005144.1
0	NA	NA	NA	NA	NA	AC005150.1
0.215243	-0.00534709	0.0312767	-0.170961	0.864254	NA	AC005154.1
0.309037	0.00245584	0.0344158	0.071358	0.943113	NA	AC005154.2
0	NA	NA	NA	NA	NA	AC005154.3
0.37272	0.0197337	0.0339059	0.581011	0.561233	NA	AC005154.4
0	NA	NA	NA	NA	NA	AC005154.5
0.794687	0.020831	0.0521169	0.387743	0.698206	NA	AC005156.1
0.179667	0.00939687	0.0312767	0.300443	0.763839	NA	AC005159.1
0	NA	NA	NA	NA	NA	AC005160.1
0	NA	NA	NA	NA	NA	AC005161.1
0	NA	NA	NA	NA	NA	AC005162.1
0.215243	-0.00534709	0.0312767	-0.170961	0.864254	NA	AC005162.2
2.02724	0.0337909	0.0803353	0.416595	0.676974	NA	AC005162.3
1.21946	-0.00964562	0.0672413	-0.145771	0.884102	NA	AC005165.1
2.25034	-0.0363204	0.085485	-0.424847	0.670949	NA	AC005165.2
0	NA	NA	NA	NA	NA	AC005176.1
0	NA	NA	NA	NA	NA	AC005176.2
0	NA	NA	NA	NA	NA	AC005178.1
4.19815	-0.0187605	0.113023	-0.165142	0.868832	NA	AC005180.1
5.4223	0.00112039	0.123707	0.0090304	0.992795	NA	AC005180.2
0	NA	NA	NA	NA	NA	AC005181.1
0.680016	-0.0271444	0.0493964	-0.553329	0.580038	NA	AC005183.1
0	NA	NA	NA	NA	NA	AC005185.1
0	NA	NA	NA	NA	NA	AC005186.1
0	NA	NA	NA	NA	NA	AC005189.1
0	NA	NA	NA	NA	NA	AC005191.1
0	NA	NA	NA	NA	NA	AC005195.1
3.37435	0.0481541	0.104326	0.459609	0.645797	NA	AC005197.1
0	NA	NA	NA	NA	NA	AC005208.1
0	NA	NA	NA	NA	NA	AC005209.1
0	NA	NA	NA	NA	NA	AC005215.1
0.64223	-0.0222486	0.0476882	-0.466001	0.641215	NA	AC005220.1
9.41435	-0.0763316	0.14997	-0.509178	0.610627	NA	AC005224.1
0.3645	0.0228702	0.0364747	0.618768	0.536069	NA	AC005224.2
1.9402	0.073985	0.0770037	1.0126	0.311252	NA	AC005224.3
0.788978	0.0235004	0.0548149	0.414915	0.678204	NA	AC005225.1
0.462563	-0.0299697	0.0397234	-0.703665	0.481642	NA	AC005225.2
0	NA	NA	NA	NA	NA	AC005225.3
1.24648	0.013272	0.0619029	0.212191	0.831958	NA	AC005225.4
7.0985	-0.0706767	0.135962	-0.518487	0.604119	NA	AC005229.1
0	NA	NA	NA	NA	NA	AC005229.2
0	NA	NA	NA	NA	NA	AC005229.3
28.4296	0.122642	0.178348	0.686595	0.492338	0.828899	AC005229.4
0.18636	0.00939687	0.0312767	0.300443	0.763839	NA	AC005230.1
0.12937	-0.00534709	0.0312767	-0.170961	0.864254	NA	AC005232.1
0.525263	-0.0103596	0.0439341	-0.259087	0.795568	NA	AC005234.1
0	NA	NA	NA	NA	NA	AC005237.1
0.178141	0.00939687	0.0312767	0.300443	0.763839	NA	AC005237.2
0.495396	0.0173099	0.0433281	0.403052	0.68691	NA	AC005244.1
0	NA	NA	NA	NA	NA	AC005244.2
0	NA	NA	NA	NA	NA	AC005252.1
0	NA	NA	NA	NA	NA	AC005252.2
0	NA	NA	NA	NA	NA	AC005252.3
15.6506	0.02989	0.164859	0.182513	0.85518	0.964241	AC005253.1
0	NA	NA	NA	NA	NA	AC005253.2
0	NA	NA	NA	NA	NA	AC005255.1
0	NA	NA	NA	NA	NA	AC005256.1
0	NA	NA	NA	NA	NA	AC005258.1
146.702	0.0336702	0.177091	0.190265	0.849101	0.962406	AC005261.1
4.29848	0.113724	0.111158	1.04497	0.296039	NA	AC005261.2
19.2778	-0.229283	0.173059	-1.32379	0.185573	0.566065	AC005261.3
3.76463	-0.0614055	0.109234	-0.571728	0.567507	NA	AC005261.4
6.82129	0.0137433	0.132808	0.104374	0.916873	NA	AC005261.5
0.12937	-0.00534709	0.0312767	-0.170961	0.864254	NA	AC005262.1
0	NA	NA	NA	NA	NA	AC005262.2
0.12366	-0.00534709	0.0312767	-0.170961	0.864254	NA	AC005264.1
0.62324	0.00733406	0.0470963	0.142334	0.886816	NA	AC005274.1
0	NA	NA	NA	NA	NA	AC005277.1
1.43466	0.00540836	0.0641303	0.0859108	0.931537	NA	AC005277.2
0	NA	NA	NA	NA	NA	AC005280.1
0	NA	NA	NA	NA	NA	AC005280.2
0	NA	NA	NA	NA	NA	AC005280.3
0	NA	NA	NA	NA	NA	AC005281.1
0	NA	NA	NA	NA	NA	AC005284.1
150.551	-0.081933	0.157268	-0.520958	0.602396	0.881949	AC005288.1
0.18636	0.00939687	0.0312767	0.300443	0.763839	NA	AC005291.1
0	NA	NA	NA	NA	NA	AC005291.2
0	NA	NA	NA	NA	NA	AC005293.1
0	NA	NA	NA	NA	NA	AC005294.1
0	NA	NA	NA	NA	NA	AC005296.1
0	NA	NA	NA	NA	NA	AC005297.1
0	NA	NA	NA	NA	NA	AC005297.2
0	NA	NA	NA	NA	NA	AC005297.3
0.37272	0.0197337	0.0339059	0.581011	0.561233	NA	AC005300.1
0	NA	NA	NA	NA	NA	AC005301.1
0	NA	NA	NA	NA	NA	AC005303.1
0	NA	NA	NA	NA	NA	AC005304.1
0	NA	NA	NA	NA	NA	AC005304.2
0	NA	NA	NA	NA	NA	AC005304.3
0.215243	-0.00534709	0.0312767	-0.170961	0.864254	NA	AC005306.1
15.8256	-0.198462	0.165377	-1.20119	0.229679	0.625483	AC005307.1
0	NA	NA	NA	NA	NA	AC005323.1
0	NA	NA	NA	NA	NA	AC005323.2
0	NA	NA	NA	NA	NA	AC005324.1
0	NA	NA	NA	NA	NA	AC005324.2
0.3645	0.0228702	0.0364747	0.618768	0.536069	NA	AC005324.3
0	NA	NA	NA	NA	NA	AC005324.4
0.859897	0.0527734	0.0570323	0.96188	0.33611	NA	AC005324.5
0	NA	NA	NA	NA	NA	AC005324.6
8.15109	-0.0552661	0.127645	-0.440729	0.659409	NA	AC005326.1
1.19629	0.0233055	0.0671308	0.351977	0.724856	NA	AC005329.1
0	NA	NA	NA	NA	NA	AC005329.2
0.66837	0.02869	0.0453544	0.622193	0.533815	NA	AC005329.3
3.95717	-0.0874949	0.114298	-0.772252	0.439965	NA	AC005330.1
2.94068	0.0540144	0.0974433	0.554659	0.579128	NA	AC005332.1
0.215243	-0.00534709	0.0312767	-0.170961	0.864254	NA	AC005332.2
3.15769	0.102109	0.104191	0.988244	0.323033	NA	AC005332.3
25.6606	-0.0742089	0.177211	-0.417707	0.676161	0.909742	AC005332.4
5.27821	-0.0401268	0.125006	-0.322842	0.746815	NA	AC005332.5
36.491	0.120838	0.179303	0.672413	0.501321	0.834373	AC005332.6
0.3018	0.00241329	0.0341192	0.0707313	0.943612	NA	AC005332.7
0.303327	0.00242231	0.0341822	0.0708645	0.943506	NA	AC005336.1
5.09658	-0.0555209	0.123142	-0.453814	0.649962	NA	AC005336.2
0	NA	NA	NA	NA	NA	AC005336.3
0	NA	NA	NA	NA	NA	AC005339.1
0.579744	0.0158263	0.0454387	0.420427	0.674173	NA	AC005341.1
0.376689	-0.025305	0.0372139	-0.581802	0.5607	NA	AC005342.1
0	NA	NA	NA	NA	NA	AC005342.2
3.4063	0.0251737	0.101587	0.252887	0.800356	NA	AC005343.1
0	NA	NA	NA	NA	NA	AC005344.1
0	NA	NA	NA	NA	NA	AC005345.1
0.37272	0.0197337	0.0339059	0.581011	0.561233	NA	AC005351.1
5.14232	0.0580312	0.121665	0.481991	0.629812	NA	AC005355.1
0	NA	NA	NA	NA	NA	AC005357.1
0.12937	-0.00534709	0.0312767	-0.170961	0.864254	NA	AC005357.2
0.12366	-0.00534709	0.0312767	-0.170961	0.864254	NA	AC005358.1
0	NA	NA	NA	NA	NA	AC005358.2
0	NA	NA	NA	NA	NA	AC005363.1
0.774323	0.0256048	0.0479951	0.666283	0.505231	NA	AC005363.2
0	NA	NA	NA	NA	NA	AC005370.1
0	NA	NA	NA	NA	NA	AC005375.1
0	NA	NA	NA	NA	NA	AC005377.1
0.393384	0.00290536	0.037401	0.0776814	0.938081	NA	AC005379.1
0.3018	0.00241329	0.0341192	0.0707313	0.943612	NA	AC005381.1
0.179667	0.00939687	0.0312767	0.300443	0.763839	NA	AC005383.1
2.17811	-0.0037286	0.0895778	-0.0413124	0.967047	NA	AC005387.1
3.6938	0.0849718	0.10359	0.85508	0.392507	NA	AC005387.2
0.517044	-0.0102652	0.043726	-0.258014	0.796396	NA	AC005391.1
0	NA	NA	NA	NA	NA	AC005392.1
0.366027	0.0229319	0.0365234	0.621178	0.534482	NA	AC005392.2
0	NA	NA	NA	NA	NA	AC005392.3
1.17389	-0.0108128	0.0676821	-0.157663	0.874723	NA	AC005393.1
0.179667	0.00939687	0.0312767	0.300443	0.763839	NA	AC005394.1
3.61103	-0.0607269	0.11043	-0.551879	0.581031	NA	AC005394.2
0	NA	NA	NA	NA	NA	AC005399.1
1.01589	0.058345	0.0574528	1.08374	0.278482	NA	AC005410.1
0.12366	-0.00534709	0.0312767	-0.170961	0.864254	NA	AC005410.2
0	NA	NA	NA	NA	NA	AC005412.1
0.62324	0.00733406	0.0470963	0.142334	0.886816	NA	AC005414.1
3.70947	0.0735569	0.106517	0.689398	0.490573	NA	AC005476.1
3.23982	0.0606876	0.103917	0.582748	0.560063	NA	AC005476.2
0	NA	NA	NA	NA	NA	AC005477.1
1.69596	-0.0515693	0.0803059	-0.659514	0.509566	NA	AC005479.1
1.25156	0.089076	0.0607028	1.79338	0.0729126	NA	AC005479.2
0.215243	-0.00534709	0.0312767	-0.170961	0.864254	NA	AC005480.1
0	NA	NA	NA	NA	NA	AC005480.2
0.711623	0.00366925	0.0491863	0.0760417	0.939386	NA	AC005481.1
0	NA	NA	NA	NA	NA	AC005482.1
0	NA	NA	NA	NA	NA	AC005486.1
0	NA	NA	NA	NA	NA	AC005487.1
0	NA	NA	NA	NA	NA	AC005488.1
0	NA	NA	NA	NA	NA	AC005493.1
0.179667	0.00939687	0.0312767	0.300443	0.763839	NA	AC005495.1
0	NA	NA	NA	NA	NA	AC005498.1
0.64223	-0.0222486	0.0476882	-0.466001	0.641215	NA	AC005498.2
4.93004	0.166528	0.117225	1.45528	0.145591	NA	AC005498.3
0	NA	NA	NA	NA	NA	AC005513.1
0	NA	NA	NA	NA	NA	AC005514.1
0	NA	NA	NA	NA	NA	AC005515.1
0	NA	NA	NA	NA	NA	AC005518.1
0	NA	NA	NA	NA	NA	AC005518.2
48.9591	0.106056	0.178148	0.597541	0.550147	0.859064	AC005519.1
0	NA	NA	NA	NA	NA	AC005520.1
0.178141	0.00939687	0.0312767	0.300443	0.763839	NA	AC005520.2
0.12937	-0.00534709	0.0312767	-0.170961	0.864254	NA	AC005520.3
0	NA	NA	NA	NA	NA	AC005520.4
1.6439	0.0163099	0.0785861	0.207758	0.835418	NA	AC005520.5
0	NA	NA	NA	NA	NA	AC005521.1
0.12937	-0.00534709	0.0312767	-0.170961	0.864254	NA	AC005522.1
0.48816	0.017553	0.0431223	0.399597	0.689454	NA	AC005523.1
0	NA	NA	NA	NA	NA	AC005523.2
2.57048	-0.124637	0.0939181	-1.38215	0.166927	NA	AC005524.1
0.39491	0.00291325	0.0374512	0.077788	0.937997	NA	AC005529.1
0.500349	-0.0371914	0.0410987	-0.784884	0.432521	NA	AC005531.1
1.34038	0.0673934	0.0685829	1.0173	0.309009	NA	AC005532.1
0.178141	0.00939687	0.0312767	0.300443	0.763839	NA	AC005532.2
0.976321	0.0358327	0.0570011	0.628227	0.529855	NA	AC005534.1
0.562066	-0.0181647	0.0457188	-0.375551	0.707251	NA	AC005534.2
0.926566	0.0128342	0.0613033	0.206362	0.836508	NA	AC005537.1
0	NA	NA	NA	NA	NA	AC005538.1
0	NA	NA	NA	NA	NA	AC005538.2
0.12937	-0.00534709	0.0312767	-0.170961	0.864254	NA	AC005539.1
0.315729	0.00249481	0.0346852	0.0719272	0.94266	NA	AC005540.1
0.605127	0.00759683	0.046658	0.148255	0.882141	NA	AC005544.1
0	NA	NA	NA	NA	NA	AC005544.2
2.10069	-0.0799062	0.0826971	-1.00004	0.317293	NA	AC005546.1
0	NA	NA	NA	NA	NA	AC005548.1
0	NA	NA	NA	NA	NA	AC005549.1
0	NA	NA	NA	NA	NA	AC005549.2
0	NA	NA	NA	NA	NA	AC005549.3
0	NA	NA	NA	NA	NA	AC005550.1
0	NA	NA	NA	NA	NA	AC005550.2
0	NA	NA	NA	NA	NA	AC005551.1
0	NA	NA	NA	NA	NA	AC005552.1
0	NA	NA	NA	NA	NA	AC005559.1
0.382399	-0.0257792	0.0374026	-0.590701	0.554721	NA	AC005578.1
0.179667	0.00939687	0.0312767	0.300443	0.763839	NA	AC005580.1
9.62865	0.110489	0.150278	0.734556	0.46261	NA	AC005586.1
2.43869	0.0745607	0.0930288	0.821998	0.411078	NA	AC005586.2
0	NA	NA	NA	NA	NA	AC005587.1
0	NA	NA	NA	NA	NA	AC005588.1
40.9045	0.648608	0.174483	3.78026	0.000156667	0.0050858	AC005592.1
0.481467	0.0174275	0.0429685	0.39101	0.69579	NA	AC005593.1
0	NA	NA	NA	NA	NA	AC005597.1
0	NA	NA	NA	NA	NA	AC005606.1
0	NA	NA	NA	NA	NA	AC005606.2
0	NA	NA	NA	NA	NA	AC005609.1
0	NA	NA	NA	NA	NA	AC005609.3
0	NA	NA	NA	NA	NA	AC005609.4
0.12937	-0.00534709	0.0312767	-0.170961	0.864254	NA	AC005609.5
0.18636	0.00939687	0.0312767	0.300443	0.763839	NA	AC005614.1
0	NA	NA	NA	NA	NA	AC005614.2
0	NA	NA	NA	NA	NA	AC005616.1
12.2775	0.213392	0.151281	1.40874	0.158911	0.525116	AC005618.1
0	NA	NA	NA	NA	NA	AC005618.2
0	NA	NA	NA	NA	NA	AC005618.3
0	NA	NA	NA	NA	NA	AC005621.1
0.178141	0.00939687	0.0312767	0.300443	0.763839	NA	AC005622.1
0	NA	NA	NA	NA	NA	AC005625.1
0	NA	NA	NA	NA	NA	AC005631.1
0	NA	NA	NA	NA	NA	AC005632.1
3.11627	0.107334	0.102256	1.07668	0.281625	NA	AC005632.2
0	NA	NA	NA	NA	NA	AC005632.3
0.179667	0.00939687	0.0312767	0.300443	0.763839	NA	AC005632.4
2.14461	0.0296068	0.0794896	0.382093	0.702392	NA	AC005670.1
0	NA	NA	NA	NA	NA	AC005670.2
0	NA	NA	NA	NA	NA	AC005674.1
116.837	0.15379	0.169897	0.90499	0.36547	0.75179	AC005674.2
2.31698	-0.0339551	0.0851149	-0.404604	0.685769	NA	AC005682.1
0	NA	NA	NA	NA	NA	AC005686.1
0	NA	NA	NA	NA	NA	AC005691.1
0	NA	NA	NA	NA	NA	AC005692.1
0.18636	0.00939687	0.0312767	0.300443	0.763839	NA	AC005692.2
0.39491	0.00291325	0.0374512	0.077788	0.937997	NA	AC005692.3
2.85864	0.00731042	0.0984814	0.0747417	0.94042	NA	AC005695.1
0	NA	NA	NA	NA	NA	AC005695.2
0	NA	NA	NA	NA	NA	AC005695.3
1.02411	0.0667757	0.061246	1.15767	0.246999	NA	AC005696.1
0	NA	NA	NA	NA	NA	AC005696.2
0.338903	-0.0163508	0.0354228	-0.486864	0.626355	NA	AC005696.3
62.2942	0.433741	0.176701	2.45279	0.0141753	0.133384	AC005696.4
0	NA	NA	NA	NA	NA	AC005697.1
0.430486	-0.016309	0.0353781	-0.577806	0.563395	NA	AC005697.2
0.258739	-0.012719	0.0312767	-0.362432	0.717029	NA	AC005699.1
0	NA	NA	NA	NA	NA	AC005701.1
2.85004	0.068153	0.0957931	0.732438	0.463902	NA	AC005702.1
0.430486	-0.016309	0.0353781	-0.577806	0.563395	NA	AC005702.2
2.00248	-0.0185493	0.0862277	-0.214155	0.830427	NA	AC005702.3
4.28457	-0.0258444	0.117922	-0.218851	0.826766	NA	AC005702.4
0	NA	NA	NA	NA	NA	AC005703.1
0	NA	NA	NA	NA	NA	AC005703.2
0	NA	NA	NA	NA	NA	AC005703.3
0	NA	NA	NA	NA	NA	AC005703.4
0	NA	NA	NA	NA	NA	AC005703.5
0	NA	NA	NA	NA	NA	AC005703.6
0	NA	NA	NA	NA	NA	AC005722.1
0.253029	-0.0133246	0.0320067	-0.365779	0.71453	NA	AC005722.2
0	NA	NA	NA	NA	NA	AC005722.3
2.30405	0.0498806	0.0903189	0.554068	0.579532	NA	AC005725.1
39.5917	0.093833	0.179292	0.524455	0.599962	0.881405	AC005726.1
1.68194	0.039123	0.0756689	0.523837	0.600392	NA	AC005726.2
20.481	0.0487012	0.172157	0.282816	0.777318	0.939724	AC005726.3
0	NA	NA	NA	NA	NA	AC005726.4
0	NA	NA	NA	NA	NA	AC005726.5
0	NA	NA	NA	NA	NA	AC005730.1
1.4715	-0.0054643	0.0726086	-0.0740695	0.940955	NA	AC005730.2
0.30751	0.00244691	0.0343537	0.0712268	0.943217	NA	AC005730.3
2.62227	-0.0848421	0.0901533	-0.975094	0.329514	NA	AC005736.1
0	NA	NA	NA	NA	NA	AC005736.2
1.5688	-0.0123057	0.0786059	-0.156094	0.875959	NA	AC005740.1
0.179667	0.00939687	0.0312767	0.300443	0.763839	NA	AC005740.2
0.30751	0.00244691	0.0343537	0.0712268	0.943217	NA	AC005740.3
0.610837	0.0080275	0.0494802	0.14859	0.881877	NA	AC005740.4
0	NA	NA	NA	NA	NA	AC005741.1
1.10889	0.0228539	0.0590535	0.385958	0.699528	NA	AC005746.1
0	NA	NA	NA	NA	NA	AC005746.2
0.18636	0.00939687	0.0312767	0.300443	0.763839	NA	AC005746.3
2.03546	0.035413	0.0818875	0.428413	0.66835	NA	AC005753.1
0.356281	0.0191224	0.0333813	0.556216	0.578063	NA	AC005757.1
0	NA	NA	NA	NA	NA	AC005758.1
1.75866	-0.0218554	0.080326	-0.277614	0.781309	NA	AC005759.1
0	NA	NA	NA	NA	NA	AC005771.1
0.12937	-0.00534709	0.0312767	-0.170961	0.864254	NA	AC005772.1
0	NA	NA	NA	NA	NA	AC005774.1
1.66136	-0.0165736	0.0794868	-0.210232	0.833486	NA	AC005775.1
2.721	0.0445143	0.0906666	0.496612	0.619463	NA	AC005776.1
9.09412	0.202479	0.147682	1.38098	0.167286	NA	AC005776.2
0	NA	NA	NA	NA	NA	AC005777.1
0	NA	NA	NA	NA	NA	AC005779.1
0	NA	NA	NA	NA	NA	AC005779.2
0	NA	NA	NA	NA	NA	AC005783.1
13.3795	0.192878	0.153329	1.26183	0.207011	0.596208	AC005785.1
0.253029	-0.0133246	0.0320067	-0.365779	0.71453	NA	AC005786.1
0	NA	NA	NA	NA	NA	AC005786.2
0	NA	NA	NA	NA	NA	AC005786.3
0.737996	-0.0276058	0.0499478	-0.571235	0.567841	NA	AC005786.4
0	NA	NA	NA	NA	NA	AC005789.1
0.863866	-0.0148483	0.0575437	-0.255849	0.798067	NA	AC005790.1
0.215243	-0.00534709	0.0312767	-0.170961	0.864254	NA	AC005796.1
0.178141	0.00939687	0.0312767	0.300443	0.763839	NA	AC005798.1
0.258739	-0.012719	0.0312767	-0.362432	0.717029	NA	AC005808.1
0.24732	-0.012719	0.0312767	-0.351394	0.725293	NA	AC005821.1
14.1818	0.0203656	0.162639	0.125276	0.900305	0.976694	AC005822.1
0	NA	NA	NA	NA	NA	AC005823.1
0	NA	NA	NA	NA	NA	AC005823.2
0.359334	0.0192371	0.0334804	0.560867	0.574888	NA	AC005828.1
0	NA	NA	NA	NA	NA	AC005828.2
0	NA	NA	NA	NA	NA	AC005828.3
0.315729	0.00249481	0.0346852	0.0719272	0.94266	NA	AC005828.4
0	NA	NA	NA	NA	NA	AC005828.5
0	NA	NA	NA	NA	NA	AC005828.6
0	NA	NA	NA	NA	NA	AC005828.7
0.12366	-0.00534709	0.0312767	-0.170961	0.864254	NA	AC005829.1
0.12366	-0.00534709	0.0312767	-0.170961	0.864254	NA	AC005829.2
1.00673	0.00829763	0.0626255	0.133373	0.893898	NA	AC005831.1
0.473982	-0.0310001	0.040037	-0.72004	0.4715	NA	AC005832.1
1.14905	-0.00430024	0.062951	-0.0685576	0.945342	NA	AC005832.2
1.07096	0.034305	0.0614862	0.583447	0.559593	NA	AC005832.3
0	NA	NA	NA	NA	NA	AC005832.4
24.9778	0.135005	0.175237	0.775211	0.438215	0.800851	AC005833.1
0	NA	NA	NA	NA	NA	AC005833.2
4.27537	-0.0264156	0.116867	-0.225591	0.821519	NA	AC005837.1
0	NA	NA	NA	NA	NA	AC005837.2
0.366027	0.0229319	0.0365234	0.621178	0.534482	NA	AC005837.3
0	NA	NA	NA	NA	NA	AC005838.1
3.43862	0.0456889	0.108215	0.422297	0.672808	NA	AC005838.2
61.8929	0.0450094	0.177591	0.25374	0.799696	0.947286	AC005839.1
0.610837	0.0080275	0.0494802	0.14859	0.881877	NA	AC005840.1
0.787451	0.0207898	0.0515403	0.389725	0.69674	NA	AC005840.2
2.99432	0.103341	0.0977249	1.07597	0.28194	NA	AC005840.3
1.92782	-0.0615999	0.077488	-0.823152	0.410422	NA	AC005840.4
0	NA	NA	NA	NA	NA	AC005841.1
2.26969	-0.00891091	0.0914747	-0.0975259	0.922309	NA	AC005842.1
0	NA	NA	NA	NA	NA	AC005845.1
0	NA	NA	NA	NA	NA	AC005856.1
0	NA	NA	NA	NA	NA	AC005858.1
0	NA	NA	NA	NA	NA	AC005858.2
0	NA	NA	NA	NA	NA	AC005858.3
0.432696	-0.00752897	0.041609	-0.163343	0.870248	NA	AC005863.1
1.45459	0.033234	0.0714593	0.482574	0.629399	NA	AC005865.1
3.99026	0.00118979	0.112741	0.0106008	0.991542	NA	AC005865.2
0	NA	NA	NA	NA	NA	AC005868.1
0	NA	NA	NA	NA	NA	AC005871.1
0	NA	NA	NA	NA	NA	AC005871.2
0	NA	NA	NA	NA	NA	AC005884.1
0	NA	NA	NA	NA	NA	AC005884.2
0.178141	0.00939687	0.0312767	0.300443	0.763839	NA	AC005899.1
0	NA	NA	NA	NA	NA	AC005899.2
0	NA	NA	NA	NA	NA	AC005899.3
0	NA	NA	NA	NA	NA	AC005899.4
0.12937	-0.00534709	0.0312767	-0.170961	0.864254	NA	AC005899.5
0.752609	-0.0031722	0.0507191	-0.0618286	0.950699	NA	AC005899.6
0.344613	-0.0165286	0.0356131	-0.496196	0.619756	NA	AC005899.7
1.04452	0.00113095	0.0641268	0.0173391	0.986166	NA	AC005899.8
0	NA	NA	NA	NA	NA	AC005901.1
0.178141	0.00939687	0.0312767	0.300443	0.763839	NA	AC005906.1
2.47535	0.0576576	0.0873963	0.665391	0.505801	NA	AC005906.2
0	NA	NA	NA	NA	NA	AC005906.3
0.12937	-0.00534709	0.0312767	-0.170961	0.864254	NA	AC005908.1
0.178141	0.00939687	0.0312767	0.300443	0.763839	NA	AC005908.2
0	NA	NA	NA	NA	NA	AC005909.1
4.93628	0.0991563	0.121963	0.822473	0.410808	NA	AC005911.1
656.583	0.0409316	0.13739	0.297862	0.765809	0.936188	AC005912.1
0	NA	NA	NA	NA	NA	AC005912.2
0	NA	NA	NA	NA	NA	AC005915.1
0	NA	NA	NA	NA	NA	AC005920.1
0	NA	NA	NA	NA	NA	AC005920.2
0	NA	NA	NA	NA	NA	AC005920.3
0	NA	NA	NA	NA	NA	AC005920.4
0	NA	NA	NA	NA	NA	AC005921.1
0	NA	NA	NA	NA	NA	AC005921.2
1.25725	-0.0165999	0.0695051	-0.238987	0.811116	NA	AC005921.3
0	NA	NA	NA	NA	NA	AC005921.4
0	NA	NA	NA	NA	NA	AC005926.1
0	NA	NA	NA	NA	NA	AC005943.1
0	NA	NA	NA	NA	NA	AC005943.2
0	NA	NA	NA	NA	NA	AC005944.1
0	NA	NA	NA	NA	NA	AC005951.1
0.3645	0.0228702	0.0364747	0.618768	0.536069	NA	AC005954.1
0.39491	0.00291325	0.0374512	0.077788	0.937997	NA	AC005954.2
0.747443	-0.00292508	0.0476069	-0.0606948	0.951602	NA	AC005962.1
0	NA	NA	NA	NA	NA	AC005972.1
0.18636	0.00939687	0.0312767	0.300443	0.763839	NA	AC005972.2
0.797197	0.0261791	0.0575703	0.441668	0.658729	NA	AC005972.3
1.83852	-0.000973609	0.0838619	-0.0116829	0.990679	NA	AC005993.1
0.430486	-0.016309	0.0353781	-0.577806	0.563395	NA	AC005996.1
0	NA	NA	NA	NA	NA	AC005999.1
0	NA	NA	NA	NA	NA	AC005999.2
0	NA	NA	NA	NA	NA	AC006001.1
9.3653	-0.117793	0.149222	-0.792758	0.427919	NA	AC006001.2
180.342	-0.0217506	0.1451	-0.149891	0.88085	0.971945	AC006001.3
0	NA	NA	NA	NA	NA	AC006001.4
0	NA	NA	NA	NA	NA	AC006003.1
0	NA	NA	NA	NA	NA	AC006004.1
0	NA	NA	NA	NA	NA	AC006006.1
0	NA	NA	NA	NA	NA	AC006007.1
0	NA	NA	NA	NA	NA	AC006011.1
2.00997	0.0134501	0.0833091	0.16239	0.870998	NA	AC006011.2
0.338903	-0.0163508	0.0354228	-0.486864	0.626355	NA	AC006012.1
0	NA	NA	NA	NA	NA	AC006013.1
0.215243	-0.00534709	0.0312767	-0.170961	0.864254	NA	AC006014.1
0	NA	NA	NA	NA	NA	AC006014.10
0	NA	NA	NA	NA	NA	AC006015.1
1.38192	0.095722	0.0696911	1.51848	0.128894	NA	AC006017.1
0	NA	NA	NA	NA	NA	AC006019.1
0	NA	NA	NA	NA	NA	AC006019.2
0	NA	NA	NA	NA	NA	AC006019.3
3.41055	-0.0139742	0.0940647	-0.146855	0.883247	NA	AC006020.1
0	NA	NA	NA	NA	NA	AC006022.1
0	NA	NA	NA	NA	NA	AC006023.1
0	NA	NA	NA	NA	NA	AC006023.2
1.17236	-0.00976187	0.0648378	-0.148617	0.881856	NA	AC006026.1
0	NA	NA	NA	NA	NA	AC006026.2
0.258739	-0.012719	0.0312767	-0.362432	0.717029	NA	AC006026.3
0	NA	NA	NA	NA	NA	AC006027.1
0.344613	-0.0165286	0.0356131	-0.496196	0.619756	NA	AC006028.1
0.43688	-0.00682701	0.0389209	-0.157523	0.874833	NA	AC006030.1
0.18636	0.00939687	0.0312767	0.300443	0.763839	NA	AC006033.1
1.65456	-0.0490444	0.0777005	-0.640776	0.521668	NA	AC006033.2
0	NA	NA	NA	NA	NA	AC006035.1
0	NA	NA	NA	NA	NA	AC006037.1
0	NA	NA	NA	NA	NA	AC006041.1
7.50553	-0.0616031	0.132669	-0.465201	0.641788	NA	AC006042.1
0.489687	0.0175814	0.043157	0.401567	0.688003	NA	AC006042.2
3.15326	0.0402386	0.101306	0.398559	0.690218	NA	AC006042.3
0.788978	0.0235004	0.0548149	0.414915	0.678204	NA	AC006042.4
0	NA	NA	NA	NA	NA	AC006043.1
0	NA	NA	NA	NA	NA	AC006055.1
109.99	0.764659	0.168643	4.5341	5.78503e-06	0.000370871	AC006058.1
0.68023	0.0336506	0.0488664	0.681134	0.495787	NA	AC006058.2
2.20676	0.0535737	0.0877752	0.605723	0.544698	NA	AC006058.3
36.6906	0.555285	0.177443	3.1426	0.00167457	0.029974	AC006058.4
5.71342	0.210508	0.123007	1.77296	0.0762357	NA	AC006059.1
0.973127	0.0118377	0.0553212	0.224071	0.822702	NA	AC006059.2
0	NA	NA	NA	NA	NA	AC006059.3
0	NA	NA	NA	NA	NA	AC006063.1
0	NA	NA	NA	NA	NA	AC006063.2
0.603601	0.00669184	0.0437492	0.138581	0.889782	NA	AC006064.1
3.79996	0.033774	0.101104	0.331991	0.739896	NA	AC006064.2
1.55232	0.0204408	0.0751393	0.268628	0.788216	NA	AC006064.3
0	NA	NA	NA	NA	NA	AC006064.4
2.09046	-0.0568113	0.0863244	-0.66394	0.506728	NA	AC006064.5
0	NA	NA	NA	NA	NA	AC006064.6
0	NA	NA	NA	NA	NA	AC006065.1
0	NA	NA	NA	NA	NA	AC006065.2
0	NA	NA	NA	NA	NA	AC006065.3
0	NA	NA	NA	NA	NA	AC006065.4
0	NA	NA	NA	NA	NA	AC006065.5
0	NA	NA	NA	NA	NA	AC006065.6
0	NA	NA	NA	NA	NA	AC006076.1
0.30751	0.00244691	0.0343537	0.0712268	0.943217	NA	AC006077.1
3.92254	-0.0449137	0.108274	-0.418063	0.675901	NA	AC006077.2
0	NA	NA	NA	NA	NA	AC006080.1
4.03611	-0.103335	0.108323	-0.979004	0.327578	NA	AC006111.1
10.7341	-0.12558	0.151425	-0.833427	0.404604	0.779302	AC006111.2
0.18636	0.00939687	0.0312767	0.300443	0.763839	NA	AC006111.3
0	NA	NA	NA	NA	NA	AC006115.1
0	NA	NA	NA	NA	NA	AC006115.2
0	NA	NA	NA	NA	NA	AC006115.3
2.31919	-0.0123559	0.0890256	-0.138045	0.890204	NA	AC006116.1
2.75883	0.0117359	0.0973232	0.120495	0.904091	NA	AC006116.10
0.559856	-0.0361022	0.0420876	-0.831376	0.405761	NA	AC006116.2
0	NA	NA	NA	NA	NA	AC006116.3
3.9072	-0.0169253	0.112506	-0.151932	0.879241	NA	AC006116.4
0.215243	-0.00534709	0.0312767	-0.170961	0.864254	NA	AC006116.5
2.01063	-0.0797397	0.0839106	-0.974657	0.329731	NA	AC006116.6
0	NA	NA	NA	NA	NA	AC006116.7
1.28643	-0.0639785	0.0627233	-1.1531	0.248871	NA	AC006116.8
1.03804	0.0681397	0.0620901	1.1765	0.239396	NA	AC006116.9
1.55759	0.0554076	0.0748987	0.761694	0.446243	NA	AC006122.1
15.0987	0.178841	0.159057	1.1277	0.259446	0.66059	AC006128.1
0	NA	NA	NA	NA	NA	AC006130.1
0	NA	NA	NA	NA	NA	AC006130.2
0	NA	NA	NA	NA	NA	AC006133.1
17.1417	0.23314	0.159314	1.47025	0.141494	0.500641	AC006141.1
0	NA	NA	NA	NA	NA	AC006144.1
1.06514	0.00175586	0.058677	0.0295608	0.976417	NA	AC006145.1
0	NA	NA	NA	NA	NA	AC006146.1
0	NA	NA	NA	NA	NA	AC006148.1
0.12937	-0.00534709	0.0312767	-0.170961	0.864254	NA	AC006148.2
0	NA	NA	NA	NA	NA	AC006150.1
0	NA	NA	NA	NA	NA	AC006150.2
0	NA	NA	NA	NA	NA	AC006153.1
0	NA	NA	NA	NA	NA	AC006157.1
0	NA	NA	NA	NA	NA	AC006158.1
0	NA	NA	NA	NA	NA	AC006159.1
0	NA	NA	NA	NA	NA	AC006159.2
1.1237	-0.00367906	0.0625863	-0.058754	0.953148	NA	AC006160.1
0	NA	NA	NA	NA	NA	AC006160.2
0	NA	NA	NA	NA	NA	AC006195.1
0	NA	NA	NA	NA	NA	AC006197.1
0.382399	-0.0257792	0.0374026	-0.590701	0.554721	NA	AC006199.1
0	NA	NA	NA	NA	NA	AC006205.1
0	NA	NA	NA	NA	NA	AC006205.2
1.15195	0.0511861	0.0631091	0.826901	0.408293	NA	AC006206.1
1.93373	-0.0131367	0.0813991	-0.159535	0.873247	NA	AC006206.2
0	NA	NA	NA	NA	NA	AC006207.1
0	NA	NA	NA	NA	NA	AC006210.1
2.30721	0.0686047	0.0816572	0.880043	0.378836	NA	AC006210.2
2.41644	0.0370293	0.0915617	0.403206	0.686797	NA	AC006213.1
8.83326	-0.0544367	0.142218	-0.384036	0.700952	NA	AC006213.2
2.3911	-0.0109296	0.0865538	-0.127746	0.89835	NA	AC006213.3
7.61053	0.0563707	0.135965	0.419336	0.674971	NA	AC006213.4
0.55086	0.0399243	0.0423216	0.930227	0.352254	NA	AC006213.5
10.7549	0.174634	0.152286	1.15335	0.248769	0.648254	AC006213.6
0	NA	NA	NA	NA	NA	AC006236.1
0.579744	0.0158263	0.0454387	0.420427	0.674173	NA	AC006237.1
0	NA	NA	NA	NA	NA	AC006238.1
0.3018	0.00241329	0.0341192	0.0707313	0.943612	NA	AC006238.2
0.401603	0.00294765	0.0376692	0.078251	0.937628	NA	AC006249.1
2.8355	0.0278601	0.0915591	0.302151	0.762537	NA	AC006252.1
10.357	0.116667	0.152547	0.770237	0.441159	0.802902	AC006254.1
2.32945	0.0462718	0.0853099	0.559431	0.575868	NA	AC006254.2
0.70242	0.00298244	0.0516524	0.05871	0.953183	NA	AC006254.3
0	NA	NA	NA	NA	NA	AC006262.1
0.303327	0.00242231	0.0341822	0.0708645	0.943506	NA	AC006262.2
0	NA	NA	NA	NA	NA	AC006262.3
0	NA	NA	NA	NA	NA	AC006270.1
0	NA	NA	NA	NA	NA	AC006270.2
0	NA	NA	NA	NA	NA	AC006270.3
0.485651	0.0149661	0.0403192	0.363982	0.715871	NA	AC006272.1
0	NA	NA	NA	NA	NA	AC006272.2
0.777309	-0.0366074	0.0548782	-0.694164	0.48758	NA	AC006273.1
13.2963	-0.062754	0.162202	-0.386765	0.69893	0.916913	AC006277.1
0	NA	NA	NA	NA	NA	AC006288.1
0	NA	NA	NA	NA	NA	AC006296.1
0	NA	NA	NA	NA	NA	AC006296.2
0	NA	NA	NA	NA	NA	AC006299.1
12.1918	0.0265801	0.156893	0.169017	0.865783	0.966955	AC006305.1
0	NA	NA	NA	NA	NA	AC006305.2
0	NA	NA	NA	NA	NA	AC006305.3
0	NA	NA	NA	NA	NA	AC006322.1
0	NA	NA	NA	NA	NA	AC006326.1
0	NA	NA	NA	NA	NA	AC006328.1
0	NA	NA	NA	NA	NA	AC006328.2
390.513	-0.376109	0.133171	-2.82264	0.00476298	0.0629667	AC006329.1
1.09053	-0.0300031	0.0616934	-0.495705	0.620103	NA	AC006329.2
7.83419	-0.13921	0.141201	-0.995067	0.319704	NA	AC006330.1
0	NA	NA	NA	NA	NA	AC006333.1
43.4803	-0.155729	0.178729	-0.871005	0.383751	0.763497	AC006333.2
0	NA	NA	NA	NA	NA	AC006335.1
0	NA	NA	NA	NA	NA	AC006335.2
0	NA	NA	NA	NA	NA	AC006335.3
0	NA	NA	NA	NA	NA	AC006338.1
0	NA	NA	NA	NA	NA	AC006338.2
0	NA	NA	NA	NA	NA	AC006349.1
0	NA	NA	NA	NA	NA	AC006355.1
0	NA	NA	NA	NA	NA	AC006355.2
0	NA	NA	NA	NA	NA	AC006357.1
0	NA	NA	NA	NA	NA	AC006362.1
0	NA	NA	NA	NA	NA	AC006363.1
0	NA	NA	NA	NA	NA	AC006366.1
0	NA	NA	NA	NA	NA	AC006369.1
0	NA	NA	NA	NA	NA	AC006369.2
0	NA	NA	NA	NA	NA	AC006371.1
0.178141	0.00939687	0.0312767	0.300443	0.763839	NA	AC006372.1
0.517044	-0.0102652	0.043726	-0.258014	0.796396	NA	AC006372.2
0.613346	0.00808367	0.0468516	0.157453	0.874887	NA	AC006372.3
0	NA	NA	NA	NA	NA	AC006377.1
1.69497	-0.0482346	0.0770415	-0.643667	0.519792	NA	AC006378.1
0	NA	NA	NA	NA	NA	AC006380.1
0	NA	NA	NA	NA	NA	AC006386.1
0	NA	NA	NA	NA	NA	AC006386.2
2.07361	0.0724413	0.0839774	0.886282	0.375466	NA	AC006387.1
0	NA	NA	NA	NA	NA	AC006390.1
0	NA	NA	NA	NA	NA	AC006427.1
0	NA	NA	NA	NA	NA	AC006432.1
0	NA	NA	NA	NA	NA	AC006435.1
18.0058	0.323228	0.161786	2.03446	0.0419053	0.262607	AC006435.2
0	NA	NA	NA	NA	NA	AC006435.3
0	NA	NA	NA	NA	NA	AC006435.4
0	NA	NA	NA	NA	NA	AC006435.5
2.68744	0.0204126	0.0891125	0.233819	0.815125	NA	AC006441.1
0	NA	NA	NA	NA	NA	AC006441.2
0	NA	NA	NA	NA	NA	AC006441.3
0	NA	NA	NA	NA	NA	AC006441.4
0	NA	NA	NA	NA	NA	AC006441.5
0	NA	NA	NA	NA	NA	AC006445.1
0.31002	0.00246159	0.0344557	0.0714422	0.943046	NA	AC006445.2
0	NA	NA	NA	NA	NA	AC006449.1
0.356281	0.0191224	0.0333813	0.556216	0.578063	NA	AC006449.2
0.12366	-0.00534709	0.0312767	-0.170961	0.864254	NA	AC006449.3
5.61052	0.00828194	0.121953	0.0677436	0.94599	NA	AC006449.5
0.74119	-0.00303422	0.0536934	-0.0556759	0.9556	NA	AC006449.6
0	NA	NA	NA	NA	NA	AC006449.7
0	NA	NA	NA	NA	NA	AC006450.1
0	NA	NA	NA	NA	NA	AC006450.2
0	NA	NA	NA	NA	NA	AC006450.3
0.393384	0.00290536	0.037401	0.0776814	0.938081	NA	AC006452.1
0	NA	NA	NA	NA	NA	AC006453.1
0.366027	0.0229319	0.0365234	0.621178	0.534482	NA	AC006453.2
0	NA	NA	NA	NA	NA	AC006453.3
0	NA	NA	NA	NA	NA	AC006453.4
0	NA	NA	NA	NA	NA	AC006455.1
0	NA	NA	NA	NA	NA	AC006455.2
0	NA	NA	NA	NA	NA	AC006455.3
0	NA	NA	NA	NA	NA	AC006455.4
0	NA	NA	NA	NA	NA	AC006455.5
0	NA	NA	NA	NA	NA	AC006455.6
0	NA	NA	NA	NA	NA	AC006455.7
0	NA	NA	NA	NA	NA	AC006455.8
0	NA	NA	NA	NA	NA	AC006457.1
0	NA	NA	NA	NA	NA	AC006458.1
0.663791	0.0284507	0.0452427	0.617275	0.537053	NA	AC006460.1
0	NA	NA	NA	NA	NA	AC006461.1
0	NA	NA	NA	NA	NA	AC006463.1
0	NA	NA	NA	NA	NA	AC006466.1
0	NA	NA	NA	NA	NA	AC006480.1
2.41089	-0.0113096	0.0875455	-0.132572	0.894532	NA	AC006480.2
0	NA	NA	NA	NA	NA	AC006482.1
0.838483	-0.00850326	0.0556938	-0.154374	0.877315	NA	AC006483.1
0.338903	-0.0163508	0.0354228	-0.486864	0.626355	NA	AC006483.2
0	NA	NA	NA	NA	NA	AC006484.1
0	NA	NA	NA	NA	NA	AC006486.1
0	NA	NA	NA	NA	NA	AC006486.2
1.09679	0.00232404	0.0613065	0.0388397	0.969018	NA	AC006487.1
0.178141	0.00939687	0.0312767	0.300443	0.763839	NA	AC006487.2
0	NA	NA	NA	NA	NA	AC006499.1
0	NA	NA	NA	NA	NA	AC006499.2
0	NA	NA	NA	NA	NA	AC006499.3
0	NA	NA	NA	NA	NA	AC006499.4
0	NA	NA	NA	NA	NA	AC006499.5
0	NA	NA	NA	NA	NA	AC006499.6
0	NA	NA	NA	NA	NA	AC006499.7
0	NA	NA	NA	NA	NA	AC006499.8
8.57568	-0.202	0.141937	-1.44606	0.148162	NA	AC006504.1
0	NA	NA	NA	NA	NA	AC006504.2
1.19706	-0.0431532	0.0677142	-0.650421	0.515421	NA	AC006504.3
0	NA	NA	NA	NA	NA	AC006504.4
51.5442	-0.0804003	0.176794	-0.454299	0.649614	0.898403	AC006504.5
0	NA	NA	NA	NA	NA	AC006504.6
0	NA	NA	NA	NA	NA	AC006504.7
13.6589	-0.0184991	0.164195	-0.112554	0.910384	0.980034	AC006504.8
2.02556	0.0391583	0.0851802	0.454425	0.649523	NA	AC006509.1
0.12366	-0.00534709	0.0312767	-0.170961	0.864254	NA	AC006509.2
0.12366	-0.00534709	0.0312767	-0.170961	0.864254	NA	AC006511.1
1.76116	-0.0195396	0.0770636	-0.258803	0.795787	NA	AC006511.2
15.6603	-0.0446338	0.163141	-0.272696	0.785087	0.942498	AC006511.3
1.09536	0.0233155	0.0586406	0.395721	0.692311	NA	AC006511.4
0.52428	-0.0107363	0.0438961	-0.266465	0.789881	NA	AC006511.5
0	NA	NA	NA	NA	NA	AC006512.1
0	NA	NA	NA	NA	NA	AC006512.2
0.18636	0.00939687	0.0312767	0.300443	0.763839	NA	AC006517.1
0.12937	-0.00534709	0.0312767	-0.170961	0.864254	NA	AC006518.1
0.80138	0.0211856	0.0522569	0.394149	0.693471	NA	AC006518.2
0	NA	NA	NA	NA	NA	AC006529.1
0	NA	NA	NA	NA	NA	AC006530.1
0	NA	NA	NA	NA	NA	AC006534.1
0	NA	NA	NA	NA	NA	AC006534.2
10.5813	0.09469	0.152787	0.622826	0.533399	0.849605	AC006538.1
0	NA	NA	NA	NA	NA	AC006538.2
0.43688	-0.00682701	0.0389209	-0.157523	0.874833	NA	AC006538.3
1.98775	-0.0757501	0.0841854	-0.926464	0.354205	NA	AC006539.1
3.81289	-0.0748285	0.111113	-0.67857	0.49741	NA	AC006539.2
14.1028	0.163095	0.164266	0.997146	0.318693	0.714095	AC006547.1
0	NA	NA	NA	NA	NA	AC006547.2
0	NA	NA	NA	NA	NA	AC006547.3
0	NA	NA	NA	NA	NA	AC006548.1
0	NA	NA	NA	NA	NA	AC006548.2
0.485651	0.0149661	0.0403192	0.363982	0.715871	NA	AC006548.3
18.8501	-0.10565	0.169623	-0.624668	0.532189	0.849042	AC006557.1
0	NA	NA	NA	NA	NA	AC006557.2
0	NA	NA	NA	NA	NA	AC006557.3
0	NA	NA	NA	NA	NA	AC006557.4
2.29031	-0.00835324	0.0911082	-0.0919679	0.926724	NA	AC006557.5
0	NA	NA	NA	NA	NA	AC006557.6
0	NA	NA	NA	NA	NA	AC006566.1
0.178141	0.00939687	0.0312767	0.300443	0.763839	NA	AC006581.1
14.0051	-0.0187997	0.164929	-0.113729	0.909453	0.979871	AC006581.2
0	NA	NA	NA	NA	NA	AC006600.1
0	NA	NA	NA	NA	NA	AC006600.2
0	NA	NA	NA	NA	NA	AC006840.1
0	NA	NA	NA	NA	NA	AC006924.1
0	NA	NA	NA	NA	NA	AC006926.1
0.796214	0.0209127	0.052149	0.38922	0.697113	NA	AC006927.1
0	NA	NA	NA	NA	NA	AC006927.2
0.12937	-0.00534709	0.0312767	-0.170961	0.864254	NA	AC006927.3
0	NA	NA	NA	NA	NA	AC006927.4
0	NA	NA	NA	NA	NA	AC006927.5
1.35553	-0.0211625	0.0707422	-0.303873	0.761225	NA	AC006942.1
0.88307	0.0211211	0.0592494	0.367969	0.712896	NA	AC006946.1
0.179667	0.00939687	0.0312767	0.300443	0.763839	NA	AC006946.2
0	NA	NA	NA	NA	NA	AC006946.3
0	NA	NA	NA	NA	NA	AC006947.1
0.178141	0.00939687	0.0312767	0.300443	0.763839	NA	AC006953.1
0.12366	-0.00534709	0.0312767	-0.170961	0.864254	NA	AC006960.1
0	NA	NA	NA	NA	NA	AC006960.2
0.12366	-0.00534709	0.0312767	-0.170961	0.864254	NA	AC006960.3
0	NA	NA	NA	NA	NA	AC006963.1
0	NA	NA	NA	NA	NA	AC006965.1
0	NA	NA	NA	NA	NA	AC006967.1
0	NA	NA	NA	NA	NA	AC006967.2
0	NA	NA	NA	NA	NA	AC006967.3
1.5633	0.0590195	0.0774451	0.783539	0.433311	NA	AC006970.1
0.890198	-0.0108868	0.0508646	-0.213989	0.830556	NA	AC006970.2
0	NA	NA	NA	NA	NA	AC006970.3
6.34733	-0.121104	0.13365	-0.914626	0.360388	NA	AC006971.1
0	NA	NA	NA	NA	NA	AC006972.1
0.757884	0.0288144	0.0509171	0.695125	0.486977	NA	AC006974.1
0	NA	NA	NA	NA	NA	AC006974.2
75.5668	0.475629	0.172516	2.75899	0.00579797	0.0725196	AC006978.1
0	NA	NA	NA	NA	NA	AC006978.2
0	NA	NA	NA	NA	NA	AC006986.1
0	NA	NA	NA	NA	NA	AC006987.1
0	NA	NA	NA	NA	NA	AC006987.2
0	NA	NA	NA	NA	NA	AC006987.3
0	NA	NA	NA	NA	NA	AC006988.1
0	NA	NA	NA	NA	NA	AC006989.1
0.722308	0.0611444	0.0506084	1.26144	0.207151	NA	AC006994.1
0.3018	0.00241329	0.0341192	0.0707313	0.943612	NA	AC006994.2
0	NA	NA	NA	NA	NA	AC006994.3
3.23136	0.0364705	0.101746	0.361774	0.717521	NA	AC007000.1
0.571524	0.0135517	0.0425357	0.383834	0.701102	NA	AC007000.2
0	NA	NA	NA	NA	NA	AC007000.3
1.33938	-0.0513771	0.0687643	-0.771045	0.44068	NA	AC007001.1
0	NA	NA	NA	NA	NA	AC007003.1
0	NA	NA	NA	NA	NA	AC007009.1
0	NA	NA	NA	NA	NA	AC007009.2
0	NA	NA	NA	NA	NA	AC007012.1
0	NA	NA	NA	NA	NA	AC007012.2
0	NA	NA	NA	NA	NA	AC007014.1
0.344613	-0.0165286	0.0356131	-0.496196	0.619756	NA	AC007014.2
0	NA	NA	NA	NA	NA	AC007016.1
0	NA	NA	NA	NA	NA	AC007025.1
0	NA	NA	NA	NA	NA	AC007029.1
0	NA	NA	NA	NA	NA	AC007032.1
0.12366	-0.00534709	0.0312767	-0.170961	0.864254	NA	AC007036.1
0.797197	0.0261791	0.0575703	0.441668	0.658729	NA	AC007036.2
0	NA	NA	NA	NA	NA	AC007036.3
5.4443	-0.0909413	0.117666	-0.78637	0.431651	NA	AC007038.1
14.6689	-0.134812	0.164755	-0.82009	0.412165	0.784782	AC007038.2
0.544167	0.0452208	0.0449341	0.987636	0.323331	NA	AC007040.1
0.215243	-0.00534709	0.0312767	-0.170961	0.864254	NA	AC007040.2
0	NA	NA	NA	NA	NA	AC007040.3
3.05507	-0.0155326	0.0925863	-0.166493	0.867769	NA	AC007041.1
0	NA	NA	NA	NA	NA	AC007050.1
0	NA	NA	NA	NA	NA	AC007056.1
0	NA	NA	NA	NA	NA	AC007064.1
0	NA	NA	NA	NA	NA	AC007064.2
0	NA	NA	NA	NA	NA	AC007064.3
0	NA	NA	NA	NA	NA	AC007064.4
0.832773	-0.00884942	0.0581532	-0.153695	0.87785	NA	AC007066.1
58.0053	0.17462	0.174815	0.998987	0.317801	0.713133	AC007066.2
0	NA	NA	NA	NA	NA	AC007068.1
0	NA	NA	NA	NA	NA	AC007068.2
0.68023	0.0336506	0.0488664	0.681134	0.495787	NA	AC007091.1
0	NA	NA	NA	NA	NA	AC007092.1
0.179667	0.00939687	0.0312767	0.300443	0.763839	NA	AC007096.1
19.6837	0.05871	0.17145	0.343968	0.730871	0.927315	AC007098.1
0.356281	0.0191224	0.0333813	0.556216	0.578063	NA	AC007098.2
0	NA	NA	NA	NA	NA	AC007099.1
0	NA	NA	NA	NA	NA	AC007099.2
0	NA	NA	NA	NA	NA	AC007100.1
0	NA	NA	NA	NA	NA	AC007106.1
3.66253	-0.122883	0.108552	-1.14993	0.250172	NA	AC007114.1
3.48733	0.00528613	0.100993	0.0520855	0.958461	NA	AC007114.2
0	NA	NA	NA	NA	NA	AC007115.1
0	NA	NA	NA	NA	NA	AC007126.1
6.65596	0.105141	0.127582	0.823845	0.410028	NA	AC007128.1
1.18683	-0.00993269	0.0641459	-0.153227	0.87822	NA	AC007128.2
0	NA	NA	NA	NA	NA	AC007131.3
0	NA	NA	NA	NA	NA	AC007132.1
0	NA	NA	NA	NA	NA	AC007136.1
0	NA	NA	NA	NA	NA	AC007151.1
0	NA	NA	NA	NA	NA	AC007159.1
0	NA	NA	NA	NA	NA	AC007160.1
0.179667	0.00939687	0.0312767	0.300443	0.763839	NA	AC007161.1
0	NA	NA	NA	NA	NA	AC007161.2
0	NA	NA	NA	NA	NA	AC007161.3
0	NA	NA	NA	NA	NA	AC007163.1
0	NA	NA	NA	NA	NA	AC007179.1
0.799706	0.0224544	0.0522179	0.416625	0.676952	NA	AC007179.2
0	NA	NA	NA	NA	NA	AC007179.3
0	NA	NA	NA	NA	NA	AC007182.1
38.0351	-0.245224	0.179262	-1.36591	0.171967	0.545026	AC007182.2
94.1207	0.055019	0.164562	0.334454	0.738037	0.929721	AC007191.1
0.215243	-0.00534709	0.0312767	-0.170961	0.864254	NA	AC007192.1
0	NA	NA	NA	NA	NA	AC007192.2
0	NA	NA	NA	NA	NA	AC007193.1
2.83273	0.0940679	0.0821117	1.27596	0.201969	NA	AC007193.2
0	NA	NA	NA	NA	NA	AC007193.3
9.6048	0.0937436	0.149364	0.631143	0.527947	NA	AC007204.1
0	NA	NA	NA	NA	NA	AC007207.1
2.03048	-0.0170335	0.0812802	-0.209247	0.834256	NA	AC007207.2
0	NA	NA	NA	NA	NA	AC007215.1
0.18636	0.00939687	0.0312767	0.300443	0.763839	NA	AC007216.1
0.178141	0.00939687	0.0312767	0.300443	0.763839	NA	AC007216.2
7.46303	0.0331872	0.138479	0.239407	0.81079	NA	AC007216.3
1.68081	0.043627	0.0789858	0.558735	0.576343	NA	AC007216.4
0	NA	NA	NA	NA	NA	AC007216.5
30.7576	-0.0697092	0.177443	-0.392607	0.69461	0.915709	AC007218.1
0.94753	-0.0412387	0.0550229	-0.812165	0.416697	NA	AC007218.2
0	NA	NA	NA	NA	NA	AC007220.1
0	NA	NA	NA	NA	NA	AC007221.1
0	NA	NA	NA	NA	NA	AC007221.2
0	NA	NA	NA	NA	NA	AC007223.1
0	NA	NA	NA	NA	NA	AC007224.1
0	NA	NA	NA	NA	NA	AC007224.2
1.88379	0.0489121	0.0807555	0.601599	0.547441	NA	AC007225.1
0	NA	NA	NA	NA	NA	AC007225.2
8.48654	-0.00698026	0.143184	-0.0489642	0.960948	NA	AC007228.1
34.0734	0.164842	0.179118	0.918163	0.358534	0.746596	AC007229.1
0	NA	NA	NA	NA	NA	AC007237.1
16.5209	-0.140779	0.169098	-0.8324	0.405183	0.779731	AC007238.1
5.90793	0.165569	0.131219	1.27442	0.202514	NA	AC007240.1
2.22579	-0.00919027	0.0849457	-0.106696	0.91503	NA	AC007240.2
0	NA	NA	NA	NA	NA	AC007241.1
0	NA	NA	NA	NA	NA	AC007242.1
1.0858	-0.0331553	0.065755	-0.512567	0.608254	NA	AC007249.1
9.73182	-0.271242	0.150255	-1.8218	0.0684853	NA	AC007249.2
1.78557	-0.0270973	0.0794889	-0.343963	0.730874	NA	AC007250.1
0	NA	NA	NA	NA	NA	AC007253.1
6.59252	0.041096	0.124936	0.331262	0.740447	NA	AC007255.1
0	NA	NA	NA	NA	NA	AC007255.2
3.85277	0.0296759	0.102922	0.287421	0.77379	NA	AC007256.1
0	NA	NA	NA	NA	NA	AC007262.1
0.654632	-0.0247943	0.0506883	-0.500857	0.616472	NA	AC007262.2
1.55989	-0.0368432	0.0743033	-0.508669	0.610984	NA	AC007272.1
0	NA	NA	NA	NA	NA	AC007274.1
0	NA	NA	NA	NA	NA	AC007274.2
0	NA	NA	NA	NA	NA	AC007274.3
0	NA	NA	NA	NA	NA	AC007275.1
0.722308	0.0611444	0.0506084	1.26144	0.207151	NA	AC007277.1
0	NA	NA	NA	NA	NA	AC007278.1
0	NA	NA	NA	NA	NA	AC007278.2
0.895473	0.019043	0.0569011	0.34451	0.730463	NA	AC007279.1
0	NA	NA	NA	NA	NA	AC007283.1
0.309037	0.00245584	0.0344158	0.071358	0.943113	NA	AC007283.2
2.61216	0.00383128	0.0895549	0.0439516	0.964943	NA	AC007285.1
2.02157	-0.0161211	0.0822978	-0.195471	0.845025	NA	AC007285.2
7.52965	-0.0693538	0.141332	-0.493051	0.621976	NA	AC007292.1
3.85722	0.0464634	0.105514	0.452988	0.650557	NA	AC007292.2
0	NA	NA	NA	NA	NA	AC007292.3
0	NA	NA	NA	NA	NA	AC007298.1
0.530973	-0.0108143	0.0440634	-0.267346	0.789203	NA	AC007298.2
0	NA	NA	NA	NA	NA	AC007308.1
1.33831	0.0660339	0.067579	1.01232	0.311383	NA	AC007308.6
1.09383	0.0262086	0.0623893	0.416834	0.6768	NA	AC007312.1
0.579744	0.0158263	0.0454387	0.420427	0.674173	NA	AC007314.1
190.563	-0.249069	0.155078	-1.60498	0.108499	0.442536	AC007318.1
19.2062	-0.0212115	0.170564	-0.124208	0.901151	0.976975	AC007318.2
11.324	-0.273148	0.152552	-1.80755	0.0706767	0.354234	AC007319.1
0	NA	NA	NA	NA	NA	AC007322.1
0	NA	NA	NA	NA	NA	AC007322.2
0	NA	NA	NA	NA	NA	AC007322.3
0	NA	NA	NA	NA	NA	AC007322.4
0.682739	0.0300528	0.045671	0.641674	0.521085	NA	AC007326.1
0.666301	0.0335413	0.0484922	0.67046	0.502565	NA	AC007326.2
0.62324	0.00733406	0.0470963	0.142334	0.886816	NA	AC007326.3
0	NA	NA	NA	NA	NA	AC007326.4
2.40999	0.077304	0.0828709	0.947584	0.343341	NA	AC007326.5
0	NA	NA	NA	NA	NA	AC007327.1
0	NA	NA	NA	NA	NA	AC007327.2
0	NA	NA	NA	NA	NA	AC007333.1
0	NA	NA	NA	NA	NA	AC007333.2
2.73541	-0.0150136	0.0961909	-0.156242	0.875843	NA	AC007336.1
0	NA	NA	NA	NA	NA	AC007336.2
0	NA	NA	NA	NA	NA	AC007336.3
0	NA	NA	NA	NA	NA	AC007339.1
0.179667	0.00939687	0.0312767	0.300443	0.763839	NA	AC007342.1
0	NA	NA	NA	NA	NA	AC007342.2
1.91441	0.0915825	0.0848285	1.12151	0.262072	NA	AC007342.3
0	NA	NA	NA	NA	NA	AC007342.4
0.647939	-0.0251404	0.0504941	-0.499462	0.617454	NA	AC007342.5
2.2878	-0.00885873	0.089451	-0.0992993	0.920901	NA	AC007342.6
13.5046	0.0156137	0.162525	0.0959269	0.923579	0.983914	AC007342.7
0	NA	NA	NA	NA	NA	AC007342.8
0.258739	-0.012719	0.0312767	-0.362432	0.717029	NA	AC007342.9
0.432696	-0.00752897	0.041609	-0.163343	0.870248	NA	AC007344.1
0	NA	NA	NA	NA	NA	AC007346.1
0	NA	NA	NA	NA	NA	AC007346.2
0.990793	0.0352088	0.057255	0.617767	0.536729	NA	AC007347.1
0	NA	NA	NA	NA	NA	AC007349.1
0	NA	NA	NA	NA	NA	AC007349.2
0	NA	NA	NA	NA	NA	AC007349.3
0.12937	-0.00534709	0.0312767	-0.170961	0.864254	NA	AC007349.4
0	NA	NA	NA	NA	NA	AC007353.1
0	NA	NA	NA	NA	NA	AC007358.1
0	NA	NA	NA	NA	NA	AC007359.1
0.818595	-0.0570753	0.0501322	-1.19166	0.233395	NA	AC007362.1
0	NA	NA	NA	NA	NA	AC007363.1
0.18636	0.00939687	0.0312767	0.300443	0.763839	NA	AC007364.1
1.94392	-0.0325811	0.0759539	-0.435463	0.663226	NA	AC007365.1
0.258739	-0.012719	0.0312767	-0.362432	0.717029	NA	AC007365.2
2.80361	-0.0527528	0.0981692	-0.540278	0.589005	NA	AC007368.1
0	NA	NA	NA	NA	NA	AC007368.2
0.215243	-0.00534709	0.0312767	-0.170961	0.864254	NA	AC007370.1
0.897982	0.0174712	0.0536955	0.336092	0.736802	NA	AC007370.2
0	NA	NA	NA	NA	NA	AC007375.1
13.4451	0.109777	0.159422	0.691977	0.488952	0.827854	AC007375.2
0	NA	NA	NA	NA	NA	AC007376.1
0	NA	NA	NA	NA	NA	AC007376.2
0	NA	NA	NA	NA	NA	AC007377.1
0	NA	NA	NA	NA	NA	AC007378.1
28.4514	-0.0708822	0.176834	-0.401137	0.688319	0.913329	AC007382.1
0	NA	NA	NA	NA	NA	AC007383.1
39.5888	0.114856	0.179235	0.641276	0.521344	0.844077	AC007383.2
0	NA	NA	NA	NA	NA	AC007383.3
0	NA	NA	NA	NA	NA	AC007384.1
1.08183	0.0334656	0.0610913	0.572341	0.567091	NA	AC007386.1
0.39491	0.00291325	0.0374512	0.077788	0.937997	NA	AC007386.4
0.573051	0.015727	0.0453153	0.412014	0.680329	NA	AC007387.1
15.7373	-0.147425	0.16579	-0.892801	0.371964	0.755591	AC007388.1
1.92581	-0.0412724	0.0851475	-0.490149	0.624028	NA	AC007389.1
0.18636	0.00939687	0.0312767	0.300443	0.763839	NA	AC007389.2
0	NA	NA	NA	NA	NA	AC007389.3
0	NA	NA	NA	NA	NA	AC007389.4
4.70419	0.0801016	0.117522	0.680911	0.495928	NA	AC007389.5
0.574577	0.0136769	0.0426102	0.387666	0.698263	NA	AC007390.1
28.4677	0.0118546	0.178617	0.0663894	0.947068	0.989227	AC007390.2
0.179667	0.00939687	0.0312767	0.300443	0.763839	NA	AC007391.1
0	NA	NA	NA	NA	NA	AC007394.1
0	NA	NA	NA	NA	NA	AC007395.1
0.12366	-0.00534709	0.0312767	-0.170961	0.864254	NA	AC007402.1
0	NA	NA	NA	NA	NA	AC007403.1
1.60095	0.0195948	0.0717219	0.279118	0.780154	NA	AC007405.1
0	NA	NA	NA	NA	NA	AC007405.2
23.8299	-0.0378324	0.175732	-0.214712	0.829992	0.957368	AC007405.3
0	NA	NA	NA	NA	NA	AC007406.1
0	NA	NA	NA	NA	NA	AC007406.2
0.31002	0.00246159	0.0344557	0.0714422	0.943046	NA	AC007406.3
0.722308	0.0611444	0.0506084	1.26144	0.207151	NA	AC007406.4
58.1893	0.000965763	0.175098	0.00551789	0.995597	0.998661	AC007406.5
0	NA	NA	NA	NA	NA	AC007421.1
0	NA	NA	NA	NA	NA	AC007422.1
0	NA	NA	NA	NA	NA	AC007422.2
0	NA	NA	NA	NA	NA	AC007423.1
1.35607	-0.0198954	0.0673164	-0.300169	0.764048	NA	AC007424.1
0.738746	0.0539701	0.0477178	1.1933	0.232752	NA	AC007431.1
0	NA	NA	NA	NA	NA	AC007431.2
0.12366	-0.00534709	0.0312767	-0.170961	0.864254	NA	AC007431.3
0	NA	NA	NA	NA	NA	AC007435.1
0	NA	NA	NA	NA	NA	AC007436.1
0	NA	NA	NA	NA	NA	AC007448.1
0	NA	NA	NA	NA	NA	AC007448.2
2.72563	0.0180739	0.0952353	0.191579	0.848072	NA	AC007448.3
4.70387	0.122419	0.11959	1.04528	0.295894	NA	AC007448.4
0	NA	NA	NA	NA	NA	AC007450.1
0	NA	NA	NA	NA	NA	AC007450.2
0	NA	NA	NA	NA	NA	AC007450.3
0.12366	-0.00534709	0.0312767	-0.170961	0.864254	NA	AC007450.4
0.12937	-0.00534709	0.0312767	-0.170961	0.864254	NA	AC007458.1
0	NA	NA	NA	NA	NA	AC007461.1
7.12046	-0.151551	0.13063	-1.1787	0.238516	NA	AC007463.1
0.215243	-0.00534709	0.0312767	-0.170961	0.864254	NA	AC007485.1
94.2561	-0.00980094	0.174201	-0.056336	0.955074	0.991305	AC007485.2
0	NA	NA	NA	NA	NA	AC007486.1
7.05888	0.0967503	0.139429	0.694171	0.487575	NA	AC007490.1
0.357808	0.0225972	0.0362586	0.608208	0.54305	NA	AC007491.1
0.344613	-0.0165286	0.0356131	-0.496196	0.619756	NA	AC007493.1
0	NA	NA	NA	NA	NA	AC007493.2
0	NA	NA	NA	NA	NA	AC007494.1
0.840009	-0.00841596	0.0557221	-0.152778	0.878573	NA	AC007494.2
0.80138	0.0211856	0.0522569	0.394149	0.693471	NA	AC007494.3
3.82749	0.105223	0.109622	0.981754	0.326221	NA	AC007495.1
0	NA	NA	NA	NA	NA	AC007495.2
0.67452	0.0340061	0.0486935	0.679374	0.496901	NA	AC007496.1
0.18636	0.00939687	0.0312767	0.300443	0.763839	NA	AC007496.2
0.24732	-0.012719	0.0312767	-0.351394	0.725293	NA	AC007496.3
3.55338	0.00910784	0.108404	0.0846763	0.932519	NA	AC007497.1
0	NA	NA	NA	NA	NA	AC007513.1
0	NA	NA	NA	NA	NA	AC007527.1
0	NA	NA	NA	NA	NA	AC007527.2
0	NA	NA	NA	NA	NA	AC007528.1
0	NA	NA	NA	NA	NA	AC007529.1
0.179667	0.00939687	0.0312767	0.300443	0.763839	NA	AC007529.2
2.19006	0.174251	0.0828136	2.70917	0.00674514	NA	AC007533.1
0	NA	NA	NA	NA	NA	AC007535.1
0	NA	NA	NA	NA	NA	AC007536.1
117.212	-0.0183573	0.169964	-0.10805	0.913956	0.981907	AC007537.1
0.24732	-0.012719	0.0312767	-0.351394	0.725293	NA	AC007537.2
0.579744	0.0158263	0.0454387	0.420427	0.674173	NA	AC007540.1
1.7768	-0.0284529	0.0815713	-0.351508	0.725207	NA	AC007541.1
0.562066	-0.0181647	0.0457188	-0.375551	0.707251	NA	AC007546.1
0	NA	NA	NA	NA	NA	AC007546.2
0.574577	0.0136769	0.0426102	0.387666	0.698263	NA	AC007547.1
0	NA	NA	NA	NA	NA	AC007547.2
0	NA	NA	NA	NA	NA	AC007551.1
0.309037	0.00245584	0.0344158	0.071358	0.943113	NA	AC007552.1
2.32988	0.0173615	0.0900087	0.193683	0.846424	NA	AC007552.2
0	NA	NA	NA	NA	NA	AC007556.1
0	NA	NA	NA	NA	NA	AC007557.1
0	NA	NA	NA	NA	NA	AC007557.2
0	NA	NA	NA	NA	NA	AC007557.3
0	NA	NA	NA	NA	NA	AC007557.4
0.12366	-0.00534709	0.0312767	-0.170961	0.864254	NA	AC007559.1
6.85098	-0.12053	0.132286	-0.920536	0.357293	NA	AC007560.1
0	NA	NA	NA	NA	NA	AC007560.2
0.3018	0.00241329	0.0341192	0.0707313	0.943612	NA	AC007562.1
0	NA	NA	NA	NA	NA	AC007563.1
0	NA	NA	NA	NA	NA	AC007563.2
0.309037	0.00245584	0.0344158	0.071358	0.943113	NA	AC007563.3
2.93673	-0.0317391	0.100563	-0.317484	0.750877	NA	AC007566.1
0	NA	NA	NA	NA	NA	AC007566.2
0	NA	NA	NA	NA	NA	AC007567.1
0	NA	NA	NA	NA	NA	AC007568.1
0.12937	-0.00534709	0.0312767	-0.170961	0.864254	NA	AC007569.1
0.12366	-0.00534709	0.0312767	-0.170961	0.864254	NA	AC007570.1
0	NA	NA	NA	NA	NA	AC007595.1
0	NA	NA	NA	NA	NA	AC007598.1
0	NA	NA	NA	NA	NA	AC007598.2
0	NA	NA	NA	NA	NA	AC007598.3
0	NA	NA	NA	NA	NA	AC007599.1
0	NA	NA	NA	NA	NA	AC007599.2
0.366027	0.0229319	0.0365234	0.621178	0.534482	NA	AC007601.1
0	NA	NA	NA	NA	NA	AC007601.2
0.12366	-0.00534709	0.0312767	-0.170961	0.864254	NA	AC007603.1
0	NA	NA	NA	NA	NA	AC007603.2
0	NA	NA	NA	NA	NA	AC007603.3
0	NA	NA	NA	NA	NA	AC007608.1
0	NA	NA	NA	NA	NA	AC007608.2
0.18636	0.00939687	0.0312767	0.300443	0.763839	NA	AC007608.3
0.43117	-0.00751131	0.0415624	-0.163129	0.870417	NA	AC007608.4
0	NA	NA	NA	NA	NA	AC007610.1
0.887254	0.0185925	0.0567486	0.336647	0.736383	NA	AC007610.2
0.178141	0.00939687	0.0312767	0.300443	0.763839	NA	AC007610.3
2.34312	0.020086	0.0914596	0.220808	0.825242	NA	AC007610.4
2.81461	0.125731	0.097148	1.31612	0.188133	NA	AC007611.1
1.31828	0.0114394	0.0667777	0.171724	0.863654	NA	AC007613.1
6.802	0.0817689	0.13305	0.613269	0.539698	NA	AC007614.1
0	NA	NA	NA	NA	NA	AC007614.2
0	NA	NA	NA	NA	NA	AC007618.1
0.853204	0.0523902	0.0568969	0.955591	0.339279	NA	AC007619.1
0.12937	-0.00534709	0.0312767	-0.170961	0.864254	NA	AC007619.2
0	NA	NA	NA	NA	NA	AC007620.1
0	NA	NA	NA	NA	NA	AC007620.2
0.525263	-0.0103596	0.0439341	-0.259087	0.795568	NA	AC007620.3
2.59181	0.0186075	0.0921259	0.19904	0.842231	NA	AC007621.1
0.924057	0.009916	0.0551409	0.177505	0.859112	NA	AC007622.1
6.94194	0.216798	0.137318	1.59777	0.110094	NA	AC007622.2
0	NA	NA	NA	NA	NA	AC007631.1
0.925883	-0.0130732	0.0572919	-0.235253	0.814013	NA	AC007637.1
0.12366	-0.00534709	0.0312767	-0.170961	0.864254	NA	AC007638.1
0	NA	NA	NA	NA	NA	AC007638.2
0	NA	NA	NA	NA	NA	AC007639.1
0	NA	NA	NA	NA	NA	AC007652.1
0	NA	NA	NA	NA	NA	AC007655.1
0.89129	0.0195414	0.056833	0.35527	0.722387	NA	AC007656.1
0.18636	0.00939687	0.0312767	0.300443	0.763839	NA	AC007656.2
10.6951	0.249172	0.147627	1.71138	0.0870107	0.393119	AC007663.1
0.647939	-0.0251404	0.0504941	-0.499462	0.617454	NA	AC007663.2
0.487177	0.0171599	0.0431421	0.392508	0.694683	NA	AC007663.3
5.94678	-0.0830707	0.12853	-0.654785	0.512606	NA	AC007663.4
1.67377	-0.0155309	0.0770658	-0.203689	0.838597	NA	AC007666.1
0	NA	NA	NA	NA	NA	AC007671.1
0	NA	NA	NA	NA	NA	AC007673.1
0	NA	NA	NA	NA	NA	AC007677.1
0	NA	NA	NA	NA	NA	AC007679.1
0.179667	0.00939687	0.0312767	0.300443	0.763839	NA	AC007679.2
3.50157	0.130154	0.107859	1.22241	0.221554	NA	AC007681.1
0	NA	NA	NA	NA	NA	AC007682.2
0	NA	NA	NA	NA	NA	AC007682.3
15.9265	-0.208999	0.166356	-1.25784	0.208449	0.597764	AC007683.1
0	NA	NA	NA	NA	NA	AC007683.2
0.438406	-0.00684384	0.0389675	-0.157735	0.874666	NA	AC007684.1
0	NA	NA	NA	NA	NA	AC007685.1
0	NA	NA	NA	NA	NA	AC007686.1
0	NA	NA	NA	NA	NA	AC007686.2
14.5519	0.147866	0.160722	0.925534	0.354688	0.744211	AC007686.3
0.989053	-0.0225341	0.0577596	-0.391339	0.695547	NA	AC007686.4
0.937551	0.0477145	0.0588029	0.976146	0.328992	NA	AC007687.1
0.98203	0.0391686	0.0600348	0.652186	0.514281	NA	AC007688.1
0	NA	NA	NA	NA	NA	AC007688.2
5.83874	0.0820081	0.123306	0.678242	0.497618	NA	AC007690.1
0	NA	NA	NA	NA	NA	AC007718.1
0	NA	NA	NA	NA	NA	AC007728.1
5.89523	-0.0651404	0.128166	-0.507473	0.611823	NA	AC007728.2
0.215243	-0.00534709	0.0312767	-0.170961	0.864254	NA	AC007728.3
0	NA	NA	NA	NA	NA	AC007731.1
9.35117	0.059953	0.148554	0.405188	0.685339	NA	AC007731.2
0.178141	0.00939687	0.0312767	0.300443	0.763839	NA	AC007731.3
0	NA	NA	NA	NA	NA	AC007731.4
0	NA	NA	NA	NA	NA	AC007731.5
0	NA	NA	NA	NA	NA	AC007738.1
0.3645	0.0228702	0.0364747	0.618768	0.536069	NA	AC007741.1
0	NA	NA	NA	NA	NA	AC007742.1
0	NA	NA	NA	NA	NA	AC007742.2
5.04329	-0.019976	0.12371	-0.162715	0.870743	NA	AC007743.1
0	NA	NA	NA	NA	NA	AC007744.1
0	NA	NA	NA	NA	NA	AC007749.1
0	NA	NA	NA	NA	NA	AC007750.1
0.215243	-0.00534709	0.0312767	-0.170961	0.864254	NA	AC007751.1
0.179667	0.00939687	0.0312767	0.300443	0.763839	NA	AC007751.2
2.68591	0.0159094	0.0975807	0.161899	0.871385	NA	AC007773.1
0	NA	NA	NA	NA	NA	AC007773.3
0.665318	0.0328086	0.0485021	0.664959	0.506077	NA	AC007780.1
0	NA	NA	NA	NA	NA	AC007785.1
0.179667	0.00939687	0.0312767	0.300443	0.763839	NA	AC007785.2
7.2304	0.1356	0.126229	1.09362	0.274123	NA	AC007785.3
0.309037	0.00245584	0.0344158	0.071358	0.943113	NA	AC007786.1
0	NA	NA	NA	NA	NA	AC007786.2
0	NA	NA	NA	NA	NA	AC007786.3
0	NA	NA	NA	NA	NA	AC007787.1
1.22113	0.0152573	0.0648926	0.231566	0.816875	NA	AC007790.1
0	NA	NA	NA	NA	NA	AC007792.1
0	NA	NA	NA	NA	NA	AC007795.1
3.16272	0.0743267	0.102003	0.745474	0.455985	NA	AC007823.1
0.12937	-0.00534709	0.0312767	-0.170961	0.864254	NA	AC007834.1
1.08329	-0.0305768	0.0623985	-0.498586	0.618071	NA	AC007834.2
25.77	0.151355	0.177096	0.854808	0.392657	0.771293	AC007842.1
1.21946	-0.00964562	0.0672413	-0.145771	0.884102	NA	AC007846.1
0	NA	NA	NA	NA	NA	AC007846.2
0.178141	0.00939687	0.0312767	0.300443	0.763839	NA	AC007848.1
0	NA	NA	NA	NA	NA	AC007848.2
0	NA	NA	NA	NA	NA	AC007849.1
0.253029	-0.0133246	0.0320067	-0.365779	0.71453	NA	AC007849.2
0	NA	NA	NA	NA	NA	AC007861.1
0	NA	NA	NA	NA	NA	AC007861.2
0	NA	NA	NA	NA	NA	AC007876.1
24.1661	-0.0300607	0.176924	-0.169954	0.865046	0.966955	AC007878.1
0	NA	NA	NA	NA	NA	AC007879.1
0	NA	NA	NA	NA	NA	AC007879.2
1.30828	-0.0493793	0.0701771	-0.72852	0.466295	NA	AC007879.3
0.179667	0.00939687	0.0312767	0.300443	0.763839	NA	AC007879.4
0.393384	0.00290536	0.037401	0.0776814	0.938081	NA	AC007881.1
0	NA	NA	NA	NA	NA	AC007881.2
0.900969	-0.0477951	0.0589498	-0.863923	0.38763	NA	AC007881.3
0	NA	NA	NA	NA	NA	AC007899.1
0	NA	NA	NA	NA	NA	AC007906.1
43.3158	0.430718	0.179078	2.39851	0.016462	0.148545	AC007906.2
0.215243	-0.00534709	0.0312767	-0.170961	0.864254	NA	AC007907.1
0	NA	NA	NA	NA	NA	AC007919.1
0	NA	NA	NA	NA	NA	AC007919.2
0	NA	NA	NA	NA	NA	AC007920.1
0.3645	0.0228702	0.0364747	0.618768	0.536069	NA	AC007920.2
0	NA	NA	NA	NA	NA	AC007922.1
0	NA	NA	NA	NA	NA	AC007922.2
0	NA	NA	NA	NA	NA	AC007922.3
0.179667	0.00939687	0.0312767	0.300443	0.763839	NA	AC007923.1
0	NA	NA	NA	NA	NA	AC007923.2
0	NA	NA	NA	NA	NA	AC007923.3
0	NA	NA	NA	NA	NA	AC007923.4
2.08185	-0.103123	0.0826348	-1.33459	0.18201	NA	AC007938.1
4.74362	0.10911	0.116861	0.945451	0.344429	NA	AC007938.2
13.5908	0.0421139	0.160441	0.264227	0.791605	0.944404	AC007938.3
0	NA	NA	NA	NA	NA	AC007948.1
0	NA	NA	NA	NA	NA	AC007950.1
0	NA	NA	NA	NA	NA	AC007950.2
0.12937	-0.00534709	0.0312767	-0.170961	0.864254	NA	AC007952.1
0.832773	-0.00884942	0.0581532	-0.153695	0.87785	NA	AC007952.2
0	NA	NA	NA	NA	NA	AC007952.3
0.977847	0.0396725	0.0599609	0.660036	0.509231	NA	AC007952.4
0	NA	NA	NA	NA	NA	AC007952.5
0.12366	-0.00534709	0.0312767	-0.170961	0.864254	NA	AC007952.6
0	NA	NA	NA	NA	NA	AC007952.7
0	NA	NA	NA	NA	NA	AC007952.8
0	NA	NA	NA	NA	NA	AC007952.9
0	NA	NA	NA	NA	NA	AC007953.1
0	NA	NA	NA	NA	NA	AC007953.2
0.574577	0.0136769	0.0426102	0.387666	0.698263	NA	AC007954.1
0.494639	-0.0310729	0.0377029	-0.709029	0.478306	NA	AC007956.1
0	NA	NA	NA	NA	NA	AC007965.1
0.840992	-0.00767098	0.0557336	-0.139337	0.889184	NA	AC007966.1
0	NA	NA	NA	NA	NA	AC007967.1
0	NA	NA	NA	NA	NA	AC007967.2
0	NA	NA	NA	NA	NA	AC007967.3
186	-0.235236	0.147708	-1.59193	0.1114	0.448702	AC007969.1
0	NA	NA	NA	NA	NA	AC007969.2
0	NA	NA	NA	NA	NA	AC007991.1
13.2595	0.23451	0.161488	1.45435	0.14585	0.507457	AC007991.2
8.11381	0.121326	0.140177	0.876783	0.380605	NA	AC007991.3
3.1037	0.0139346	0.0969995	0.145321	0.884457	NA	AC007991.4
0	NA	NA	NA	NA	NA	AC007992.1
0	NA	NA	NA	NA	NA	AC007992.2
0.12937	-0.00534709	0.0312767	-0.170961	0.864254	NA	AC007993.1
0	NA	NA	NA	NA	NA	AC007993.2
0.502089	0.0152545	0.040702	0.38461	0.700526	NA	AC007993.3
36.0575	-0.114438	0.179275	-0.638842	0.522926	0.844287	AC007996.1
0	NA	NA	NA	NA	NA	AC007998.1
0	NA	NA	NA	NA	NA	AC007998.2
2.895	0.0303543	0.0945366	0.324365	0.745661	NA	AC007998.3
0.18636	0.00939687	0.0312767	0.300443	0.763839	NA	AC007998.4
0.253029	-0.0133246	0.0320067	-0.365779	0.71453	NA	AC007998.5
0	NA	NA	NA	NA	NA	AC008011.1
0	NA	NA	NA	NA	NA	AC008011.2
0.18636	0.00939687	0.0312767	0.300443	0.763839	NA	AC008012.1
1.41374	0.031465	0.072661	0.429072	0.667871	NA	AC008013.1
0	NA	NA	NA	NA	NA	AC008013.2
0.3645	0.0228702	0.0364747	0.618768	0.536069	NA	AC008013.3
6.7729	0.00341775	0.133782	0.0254115	0.979727	NA	AC008014.1
0.12937	-0.00534709	0.0312767	-0.170961	0.864254	NA	AC008015.1
1.01815	0.00749042	0.0628046	0.120308	0.904239	NA	AC008026.1
0	NA	NA	NA	NA	NA	AC008026.2
0.915361	0.066719	0.0528622	1.4256	0.153983	NA	AC008026.3
0.215243	-0.00534709	0.0312767	-0.170961	0.864254	NA	AC008033.1
0	NA	NA	NA	NA	NA	AC008033.2
0	NA	NA	NA	NA	NA	AC008033.3
1.13181	-0.0313618	0.0610647	-0.522491	0.601328	NA	AC008035.1
[truncated: 55,782 more rows]

## Sheet: del30-440vsHap
baseMean	log2FoldChange	lfcSE	stat	pvalue	padj	gene_name
0.769839	0.0143425	0.0367264	0.376336	0.706667	NA	5S_rRNA
3.4519	-0.0281209	0.0745761	-0.383158	0.701603	NA	7SK
2.36972	0.00238404	0.0637882	0.0377011	0.969926	NA	A1BG
8.8523	-0.0674958	0.106509	-0.637306	0.523926	NA	A1BG-AS1
1.00591	-0.0123268	0.0447426	-0.282739	0.777377	NA	A1CF
15.4382	-0.056899	0.0517097	-1.27332	0.202903	0.637172	A2M
4.76261	-0.0156977	0.0862206	-0.18133	0.856109	NA	A2M-AS1
51.5654	0.147083	0.150694	0.976552	0.328791	0.750383	A2ML1
0.273562	0.0018957	0.0233712	0.0811127	0.935352	NA	A2ML1-AS1
0.349934	0.00227256	0.0255735	0.088864	0.92919	NA	A2ML1-AS2
1.72076	0.0590743	0.056837	1.06474	0.286994	NA	A2MP1
0.122113	-0.00351833	0.0221402	-0.158911	0.873739	NA	A3GALT2
46.6981	0.30639	0.150453	2.03641	0.0417088	0.348624	A4GALT
0.146343	0.00691865	0.0221402	0.312493	0.754666	NA	A4GNT
0	NA	NA	NA	NA	NA	AA06
582.338	-0.147222	0.113715	-1.29444	0.195513	0.629588	AAAS
685.671	0.209329	0.129958	1.61063	0.10726	0.500925	AACS
10.6336	-0.0720862	0.116146	-0.62128	0.534416	NA	AACSP1
0	NA	NA	NA	NA	NA	AADAC
0	NA	NA	NA	NA	NA	AADACL2
0	NA	NA	NA	NA	NA	AADACL2-AS1
4.87478	0.0535328	0.087778	0.61513	0.538469	NA	AADACL3
0.127219	-0.00351833	0.0221402	-0.158911	0.873739	NA	AADACL4
0	NA	NA	NA	NA	NA	AADACP1
159.149	-0.213856	0.137718	-1.55193	0.120678	0.523934	AADAT
688.526	-0.11332	0.113056	-1.0023	0.316197	0.73947	AAGAB
606.789	0.257414	0.115236	2.23373	0.0255008	0.276414	AAK1
43.4106	-0.0310244	0.149712	-0.207013	0.836	0.960659	AAMDC
957.432	-0.115443	0.112568	-1.02546	0.305145	0.733868	AAMP
3.09131	0.0163593	0.0734406	0.220475	0.825502	NA	AANAT
377.727	-0.245961	0.12709	-1.93424	0.0530834	0.384631	AAR2
23.6104	-0.0239073	0.137272	-0.173943	0.86191	0.965888	AARD
2510.78	0.0870339	0.10283	0.84636	0.397352	0.789882	AARS
390.227	0.210058	0.12328	1.70419	0.0883454	0.467754	AARS2
59.2762	-0.0673392	0.150596	-0.447194	0.654735	0.909324	AARSD1
0	NA	NA	NA	NA	NA	AARSP1
228.979	0.157649	0.130768	1.20508	0.228172	0.661641	AASDH
467.422	-0.138957	0.11832	-1.17453	0.240182	0.673074	AASDHPPT
5447.4	0.339259	0.138293	2.45375	0.0141375	0.209965	AASS
3.4871	-0.0608403	0.0743833	-0.844796	0.398225	NA	AATBC
869.479	-0.199391	0.113321	-1.75926	0.0785336	0.441659	AATF
35.9092	0.142631	0.144877	0.985665	0.324297	0.746108	AATK
0.146343	0.00691865	0.0221402	0.312493	0.754666	NA	AB015752.1
0	NA	NA	NA	NA	NA	AB019440.1
3.46471	-0.0282956	0.0788592	-0.362756	0.716787	NA	ABALON
127.428	0.553299	0.144195	3.83449	0.000125824	0.0107905	ABAT
0	NA	NA	NA	NA	NA	ABBA01006766.1
0	NA	NA	NA	NA	NA	ABC7-43041300I9.1
656.942	0.200574	0.134258	1.50657	0.131922	0.542228	ABCA1
5.2209	-0.00591657	0.0930035	-0.0637998	0.94913	NA	ABCA10
32.3895	-0.191783	0.144731	-1.32871	0.183945	0.616934	ABCA11P
1.41454	-0.063089	0.0503091	-1.37115	0.170329	NA	ABCA12
3.50925	-0.0199178	0.0769902	-0.264362	0.791501	NA	ABCA13
2.04093	0.0613489	0.0604264	1.02737	0.304244	NA	ABCA17P
96.8422	0.324516	0.148847	2.17971	0.0292792	0.293779	ABCA2
119.544	0.587944	0.14508	4.05158	5.0872e-05	0.0055348	ABCA3
2.15619	0.0390225	0.0601731	0.663212	0.507195	NA	ABCA4
203.577	0.154808	0.145812	1.06216	0.288165	0.719131	ABCA5
0	NA	NA	NA	NA	NA	ABCA6
126.562	0.455724	0.146001	3.1261	0.00177144	0.0631438	ABCA7
2.05518	0.0135318	0.0626659	0.218423	0.827099	NA	ABCA8
0.698363	-0.0203656	0.0347694	-0.545061	0.585712	NA	ABCA9
1.3466	0.0330009	0.0484773	0.689196	0.4907	NA	ABCA9-AS1
9.47053	-0.139362	0.11321	-1.24775	0.212124	NA	ABCB1
197.972	-0.262167	0.139933	-1.87496	0.0607982	0.401131	ABCB10
0.757546	0.0453099	0.0366528	1.31466	0.188624	NA	ABCB10P1
0.546914	-0.0242605	0.0298475	-0.80646	0.419978	NA	ABCB10P3
1.02288	-0.00630168	0.0435536	-0.141649	0.887357	NA	ABCB10P4
0.841759	0.00110602	0.0368521	0.0316674	0.974737	NA	ABCB11
11.7856	-0.125207	0.117733	-1.07256	0.283468	NA	ABCB4
0.661743	0.0354891	0.0326068	1.11434	0.265134	NA	ABCB5
30.0761	-0.0464554	0.145731	-0.319728	0.749174	0.934562	ABCB6
465.173	0.0512859	0.119038	0.430813	0.666604	0.913554	ABCB7
174.563	-0.0605031	0.140782	-0.430166	0.667075	0.913554	ABCB8
46.6935	-0.330377	0.149436	-2.22202	0.0262822	0.279889	ABCB9
1084.76	0.247085	0.112277	2.2008	0.02775	0.286909	ABCC1
236.409	0.117189	0.135577	0.864842	0.387126	0.782894	ABCC10
2.04931	0.00583414	0.061635	0.0940805	0.925045	NA	ABCC11
0.544178	0.0140196	0.0317602	0.475919	0.634132	NA	ABCC12
0.462701	0.0122832	0.0303565	0.377206	0.706021	NA	ABCC13
12.1788	0.0929731	0.120433	0.776092	0.437694	NA	ABCC2
3.07117	0.0180708	0.07191	0.253786	0.799661	NA	ABCC3
197.829	-0.116794	0.135325	-0.863525	0.387849	0.783607	ABCC4
938.859	0.0245749	0.117534	0.20912	0.834354	0.960012	ABCC5
0.414799	0.00952359	0.0273498	0.292719	0.769737	NA	ABCC5-AS1
9.2944	0.188098	0.112115	1.69592	0.0899007	NA	ABCC6
1.12683	0.00811542	0.0453773	0.173432	0.862312	NA	ABCC6P1
0.557228	-0.00665592	0.0319766	-0.246517	0.805282	NA	ABCC6P2
12.4913	-0.044283	0.120166	-0.3723	0.70967	NA	ABCC8
0.788303	-0.0221983	0.0369735	-0.641506	0.521194	NA	ABCC9
52.9869	0.0663024	0.150686	0.439353	0.660406	0.91168	ABCD1
0	NA	NA	NA	NA	NA	ABCD1P2
0	NA	NA	NA	NA	NA	ABCD1P3
0	NA	NA	NA	NA	NA	ABCD1P4
0	NA	NA	NA	NA	NA	ABCD1P5
0.900204	-0.0319547	0.0416813	-0.832139	0.405331	NA	ABCD2
585.716	-0.130568	0.114116	-1.14407	0.252595	0.685004	ABCD3
694.948	0.193183	0.12654	1.52715	0.126723	0.535795	ABCD4
1625.18	-0.354865	0.105095	-3.37629	0.000734702	0.0356211	ABCE1
0.146343	0.00691865	0.0221402	0.312493	0.754666	NA	ABCF1
216.893	-0.379912	0.133108	-2.85366	0.00432183	0.105718	ABCF2
1.76978	-0.011209	0.0560317	-0.202226	0.83974	NA	ABCF2P1
0	NA	NA	NA	NA	NA	ABCF2P2
442.473	-0.037807	0.119154	-0.317291	0.751023	0.935486	ABCF3
54.7935	0.0538223	0.150696	0.357997	0.720346	0.928597	ABCG1
34.1528	-0.101154	0.140657	-0.71981	0.471642	0.829845	ABCG2
7.71267	0.19829	0.105595	1.91927	0.0549506	NA	ABCG4
0.945717	0.0166805	0.0412233	0.422998	0.672297	NA	ABCG5
1.29957	0.0521515	0.0507044	1.05417	0.291803	NA	ABCG8
7.71704	0.106978	0.106826	1.00485	0.314968	NA	ABHD1
222.315	-0.231357	0.135343	-1.70789	0.0876573	0.466067	ABHD10
142.033	0.14868	0.138294	1.07475	0.282488	0.714066	ABHD11
0.56569	-0.0111809	0.0327336	-0.353558	0.72367	NA	ABHD11-AS1
603.176	-0.0073624	0.117369	-0.0627442	0.94997	0.991214	ABHD12
4.82355	0.0335825	0.0858217	0.395677	0.692344	NA	ABHD12B
323.668	-0.134539	0.14157	-0.951022	0.341593	0.758224	ABHD13
11.954	-0.0598856	0.120524	-0.498621	0.618046	NA	ABHD14A
0.33962	-0.0113147	0.0251754	-0.481043	0.630486	NA	ABHD14A-ACY1
30.4098	-0.0596063	0.143468	-0.416951	0.676714	0.915201	ABHD14B
11.0925	-0.0747231	0.112799	-0.664241	0.506536	NA	ABHD15
0	NA	NA	NA	NA	NA	ABHD15-AS1
0	NA	NA	NA	NA	NA	ABHD16A
0	NA	NA	NA	NA	NA	ABHD16B
148.722	0.0739188	0.14253	0.518961	0.603788	0.888364	ABHD17A
0	NA	NA	NA	NA	NA	ABHD17AP1
0	NA	NA	NA	NA	NA	ABHD17AP2
0.462701	0.0122832	0.0303565	0.377206	0.706021	NA	ABHD17AP3
0	NA	NA	NA	NA	NA	ABHD17AP4
0.461733	-0.0238495	0.0303015	-0.746818	0.455173	NA	ABHD17AP5
0.344827	0.00224861	0.0254393	0.088391	0.929566	NA	ABHD17AP6
0	NA	NA	NA	NA	NA	ABHD17AP7
0	NA	NA	NA	NA	NA	ABHD17AP8
0	NA	NA	NA	NA	NA	ABHD17AP9
601.573	-0.0471414	0.117277	-0.401916	0.687746	0.917721	ABHD17B
285.035	-0.114584	0.129784	-0.882868	0.377308	0.778672	ABHD17C
262.433	0.0498308	0.127426	0.391039	0.695768	0.920807	ABHD18
522.882	0.0465577	0.136905	0.340245	0.733672	0.931375	ABHD2
86.1881	0.05594	0.149942	0.373572	0.708723	0.924405	ABHD3
788.053	-0.214592	0.125234	-1.71327	0.0866632	0.464167	ABHD4
309.487	-0.0472048	0.121745	-0.387762	0.698192	0.921961	ABHD5
23.4022	0.29422	0.139688	2.11183	0.0347012	0.316193	ABHD6
113.128	-0.0173124	0.148854	-0.116221	0.907478	0.979107	ABHD8
440.622	-0.0910686	0.120337	-0.75658	0.449301	0.816982	ABI1
0	NA	NA	NA	NA	NA	ABI1P1
2049.29	0.163509	0.0973456	1.67971	0.093013	0.476471	ABI2
28.7128	-0.195042	0.14429	-1.34645	0.178159	0.60918	ABI3
5.56948	-0.0449902	0.0882113	-0.513467	0.607624	NA	ABI3BP
1350.8	-0.00269851	0.119593	-0.0225619	0.982	0.99781	ABL1
484.449	0.0887207	0.116788	0.759712	0.447427	0.816094	ABL2
965.152	-0.329257	0.117176	-2.80925	0.0049657	0.115495	ABLIM1
10.9588	0.164798	0.11907	1.38438	0.166243	NA	ABLIM2
7.25497	0.0391799	0.104026	0.379332	0.704441	NA	ABLIM3
1.15009	-0.0140039	0.046134	-0.297881	0.765794	NA	ABO
484.208	0.265896	0.128982	2.06099	0.039304	0.338137	ABR
0	NA	NA	NA	NA	NA	ABRA
840.293	0.000201236	0.112433	0.00178961	0.998572	0.999647	ABRACL
140.674	0.212189	0.139002	1.52574	0.127075	0.5363	ABRAXAS1
256.256	0.0251035	0.129738	0.193443	0.846612	0.962248	ABRAXAS2
279.392	-0.119706	0.13344	-0.896942	0.36975	0.773953	ABT1
0.292686	0.0121372	0.0221402	0.471018	0.637628	NA	ABT1P1
56.2997	0.197202	0.150641	1.31136	0.189736	0.624838	ABTB1
118.85	-0.238642	0.148999	-1.60232	0.109085	0.504541	ABTB2
0	NA	NA	NA	NA	NA	AC000003.1
0	NA	NA	NA	NA	NA	AC000003.2
0	NA	NA	NA	NA	NA	AC000029.1
0	NA	NA	NA	NA	NA	AC000032.1
0	NA	NA	NA	NA	NA	AC000035.1
0	NA	NA	NA	NA	NA	AC000036.1
0	NA	NA	NA	NA	NA	AC000041.1
0	NA	NA	NA	NA	NA	AC000058.1
0	NA	NA	NA	NA	NA	AC000061.1
0	NA	NA	NA	NA	NA	AC000067.1
13.3647	0.0582687	0.123664	0.473394	0.635932	0.903113	AC000068.1
1.35955	-0.0142535	0.0524577	-0.276864	0.781884	NA	AC000068.2
0	NA	NA	NA	NA	NA	AC000068.3
0	NA	NA	NA	NA	NA	AC000077.1
0	NA	NA	NA	NA	NA	AC000078.1
0.122113	-0.00351833	0.0221402	-0.158911	0.873739	NA	AC000081.1
46.2634	0.095182	0.150303	0.632805	0.526861	0.858078	AC000089.1
0	NA	NA	NA	NA	NA	AC000095.1
0	NA	NA	NA	NA	NA	AC000095.2
0	NA	NA	NA	NA	NA	AC000099.1
0	NA	NA	NA	NA	NA	AC000111.1
0	NA	NA	NA	NA	NA	AC000111.2
1.42223	-0.0592565	0.0507965	-1.36261	0.173006	NA	AC000120.1
0	NA	NA	NA	NA	NA	AC000120.2
0	NA	NA	NA	NA	NA	AC000120.3
1.47707	-0.00300418	0.0505692	-0.0585281	0.953328	NA	AC000123.1
0.321464	0.00213746	0.0248071	0.0861634	0.931337	NA	AC000123.2
6.73342	-0.00988915	0.0992686	-0.100384	0.92004	NA	AC000123.3
0	NA	NA	NA	NA	NA	AC000124.1
0	NA	NA	NA	NA	NA	AC000362.1
0.395676	-0.00478247	0.0288012	-0.142671	0.88655	NA	AC000367.1
0	NA	NA	NA	NA	NA	AC000372.1
0.122113	-0.00351833	0.0221402	-0.158911	0.873739	NA	AC000374.1
1.52936	0.00597625	0.0499845	0.118139	0.905957	NA	AC000403.1
0.740503	-0.00166996	0.0382113	-0.0431091	0.965615	NA	AC001226.1
0.369057	0.0168313	0.0260449	0.633171	0.526622	NA	AC002044.1
0	NA	NA	NA	NA	NA	AC002044.2
0	NA	NA	NA	NA	NA	AC002044.3
7.68663	-0.0231645	0.104975	-0.220149	0.825755	NA	AC002056.1
0	NA	NA	NA	NA	NA	AC002056.2
0.815581	0.00405742	0.0378018	0.103426	0.917625	NA	AC002059.1
0	NA	NA	NA	NA	NA	AC002059.2
0.249333	-0.00911251	0.0226086	-0.352452	0.724499	NA	AC002064.1
4.18206	0.0030699	0.0847472	0.0359173	0.971348	NA	AC002064.2
0	NA	NA	NA	NA	NA	AC002064.3
0	NA	NA	NA	NA	NA	AC002066.1
0	NA	NA	NA	NA	NA	AC002066.2
0	NA	NA	NA	NA	NA	AC002069.1
0	NA	NA	NA	NA	NA	AC002069.2
0	NA	NA	NA	NA	NA	AC002070.1
0.515709	0.0119939	0.0293236	0.413927	0.678928	NA	AC002074.1
0	NA	NA	NA	NA	NA	AC002074.2
0	NA	NA	NA	NA	NA	AC002075.1
1.32618	0.0190553	0.049184	0.379856	0.704052	NA	AC002075.2
0.496277	0.012486	0.0309604	0.413601	0.679167	NA	AC002076.1
0	NA	NA	NA	NA	NA	AC002076.2
0	NA	NA	NA	NA	NA	AC002090.1
2.86346	0.0345525	0.0677641	0.521869	0.601762	NA	AC002091.1
3.77704	0.0260532	0.0815425	0.317194	0.751096	NA	AC002091.2
0	NA	NA	NA	NA	NA	AC002094.1
0	NA	NA	NA	NA	NA	AC002094.2
0	NA	NA	NA	NA	NA	AC002094.3
0.669238	-0.0044727	0.0349943	-0.118687	0.905524	NA	AC002094.4
4.32644	-0.0252872	0.0860905	-0.292456	0.769938	NA	AC002094.5
0	NA	NA	NA	NA	NA	AC002101.1
0	NA	NA	NA	NA	NA	AC002115.1
0	NA	NA	NA	NA	NA	AC002116.1
4.2021	-0.0319683	0.0760598	-0.418133	0.67585	NA	AC002116.2
0	NA	NA	NA	NA	NA	AC002127.1
0	NA	NA	NA	NA	NA	AC002127.2
13.7907	0.143739	0.123459	1.17208	0.241166	0.674226	AC002128.1
13.2694	0.119491	0.121168	0.997956	0.318301	0.740597	AC002128.2
0	NA	NA	NA	NA	NA	AC002306.1
12.1754	0.0474713	0.122583	0.385356	0.699974	NA	AC002310.1
0.194245	0.00691865	0.0221402	0.312493	0.754666	NA	AC002310.2
3.58398	-0.0132771	0.0794885	-0.167886	0.866673	NA	AC002310.3
0	NA	NA	NA	NA	NA	AC002310.4
0	NA	NA	NA	NA	NA	AC002310.5
11.913	-0.100147	0.118361	-0.843588	0.3989	NA	AC002310.6
0.466839	-0.0210806	0.0283953	-0.702109	0.482611	NA	AC002347.1
0.583846	-0.0334269	0.0331963	-0.951745	0.341226	NA	AC002347.2
6.32492	0.0225418	0.0977194	0.233065	0.815711	NA	AC002350.1
3.56745	0.0321508	0.0777571	0.417285	0.67647	NA	AC002351.1
0	NA	NA	NA	NA	NA	AC002366.1
0.60297	-0.0162042	0.0331963	-0.4406	0.659503	NA	AC002367.1
0.273562	0.0018957	0.0233712	0.0811127	0.935352	NA	AC002368.1
0	NA	NA	NA	NA	NA	AC002375.1
0.127219	-0.00351833	0.0221402	-0.158911	0.873739	NA	AC002378.1
0	NA	NA	NA	NA	NA	AC002381.1
0	NA	NA	NA	NA	NA	AC002383.1
0	NA	NA	NA	NA	NA	AC002386.1
0	NA	NA	NA	NA	NA	AC002395.1
0.657829	0.0115227	0.031666	0.498712	0.617982	NA	AC002398.1
0	NA	NA	NA	NA	NA	AC002398.2
0.629359	0.0128406	0.0332768	0.49448	0.620967	NA	AC002400.1
0	NA	NA	NA	NA	NA	AC002401.1
0.146343	0.00691865	0.0221402	0.312493	0.754666	NA	AC002401.2
0.820687	0.00326062	0.0353234	0.0892815	0.928858	NA	AC002401.3
0.122113	-0.00351833	0.0221402	-0.158911	0.873739	NA	AC002401.4
55.7041	0.16613	0.150629	1.10462	0.269323	0.703058	AC002407.1
0.2124	-0.00351833	0.0221402	-0.158911	0.873739	NA	AC002428.1
0.122113	-0.00351833	0.0221402	-0.158911	0.873739	NA	AC002428.2
0	NA	NA	NA	NA	NA	AC002429.1
1.13869	0.00392272	0.0441878	0.0918867	0.926788	NA	AC002429.2
0.222714	0.00691865	0.0221402	0.312493	0.754666	NA	AC002451.1
0	NA	NA	NA	NA	NA	AC002451.2
3.97616	-0.0259453	0.0798005	-0.321824	0.747586	NA	AC002454.1
2.43564	0.0159532	0.0667773	0.235495	0.813825	NA	AC002456.1
0	NA	NA	NA	NA	NA	AC002456.2
0	NA	NA	NA	NA	NA	AC002460.1
0.146343	0.00691865	0.0221402	0.312493	0.754666	NA	AC002463.1
0	NA	NA	NA	NA	NA	AC002464.1
0	NA	NA	NA	NA	NA	AC002465.1
13.3257	-0.148013	0.124093	-1.19428	0.232369	0.665418	AC002467.1
0.972027	0.00457928	0.0423447	0.108176	0.913856	NA	AC002470.1
0	NA	NA	NA	NA	NA	AC002470.2
0	NA	NA	NA	NA	NA	AC002472.1
0	NA	NA	NA	NA	NA	AC002472.2
0	NA	NA	NA	NA	NA	AC002472.3
0	NA	NA	NA	NA	NA	AC002472.4
0	NA	NA	NA	NA	NA	AC002477.1
3.27001	-0.0635657	0.0767237	-0.843087	0.39918	NA	AC002480.1
1.6734	-0.0188769	0.0538785	-0.345581	0.729657	NA	AC002480.2
0	NA	NA	NA	NA	NA	AC002485.1
0	NA	NA	NA	NA	NA	AC002486.1
0.321464	0.00213746	0.0248071	0.0861634	0.931337	NA	AC002486.2
0	NA	NA	NA	NA	NA	AC002487.1
0	NA	NA	NA	NA	NA	AC002504.1
0	NA	NA	NA	NA	NA	AC002511.1
0	NA	NA	NA	NA	NA	AC002511.2
1.44199	0.0342483	0.0535143	0.658795	0.510027	NA	AC002519.1
0.443577	-0.00459758	0.0299124	-0.14893	0.881609	NA	AC002519.2
29.9632	0.0992462	0.143006	0.69144	0.489289	0.839227	AC002524.1
1.48743	0.0336507	0.0502937	0.686668	0.492292	NA	AC002525.1
0	NA	NA	NA	NA	NA	AC002539.2
0	NA	NA	NA	NA	NA	AC002540.1
0.127219	-0.00351833	0.0221402	-0.158911	0.873739	NA	AC002542.1
0.400782	-0.00434707	0.0268995	-0.137534	0.890609	NA	AC002543.1
6.12468	-0.101625	0.0964512	-1.07656	0.281676	NA	AC002545.1
0	NA	NA	NA	NA	NA	AC002546.1
1.72729	-0.03028	0.0561465	-0.555629	0.578464	NA	AC002550.1
8.73853	-0.0521772	0.102492	-0.505862	0.612954	NA	AC002550.2
0.369057	0.0168313	0.0260449	0.633171	0.526622	NA	AC002551.1
11.2663	-0.0119094	0.118976	-0.100591	0.919875	NA	AC002553.1
4.66746	-0.0388299	0.0890619	-0.436335	0.662594	NA	AC002553.2
0.807427	-0.00653695	0.039242	-0.167079	0.867308	NA	AC002558.1
0.127219	-0.00351833	0.0221402	-0.158911	0.873739	NA	AC002558.2
2.3343	-0.105889	0.0625153	-2.01082	0.0443446	NA	AC002558.3
1.36465	-0.0144936	0.0525021	-0.281468	0.778352	NA	AC002563.1
0	NA	NA	NA	NA	NA	AC002978.1
0	NA	NA	NA	NA	NA	AC002979.1
0	NA	NA	NA	NA	NA	AC002981.1
0	NA	NA	NA	NA	NA	AC002984.1
0	NA	NA	NA	NA	NA	AC002985.1
0	NA	NA	NA	NA	NA	AC002992.1
0	NA	NA	NA	NA	NA	AC002994.1
0	NA	NA	NA	NA	NA	AC002996.1
0.127219	-0.00351833	0.0221402	-0.158911	0.873739	NA	AC003001.1
0.344827	0.00224861	0.0254393	0.088391	0.929566	NA	AC003001.2
0	NA	NA	NA	NA	NA	AC003002.1
0.249333	-0.00911251	0.0226086	-0.352452	0.724499	NA	AC003002.2
0.515709	0.0119939	0.0293236	0.413927	0.678928	NA	AC003002.3
0	NA	NA	NA	NA	NA	AC003005.1
1.43102	0.0251225	0.0527485	0.473013	0.636204	NA	AC003005.2
0	NA	NA	NA	NA	NA	AC003006.1
0.194245	0.00691865	0.0221402	0.312493	0.754666	NA	AC003009.1
0	NA	NA	NA	NA	NA	AC003029.1
0	NA	NA	NA	NA	NA	AC003035.1
0	NA	NA	NA	NA	NA	AC003035.2
0.127219	-0.00351833	0.0221402	-0.158911	0.873739	NA	AC003043.1
0.685415	0.0277846	0.0367492	0.741776	0.458223	NA	AC003043.2
0	NA	NA	NA	NA	NA	AC003045.1
0	NA	NA	NA	NA	NA	AC003070.1
0	NA	NA	NA	NA	NA	AC003070.2
0	NA	NA	NA	NA	NA	AC003071.1
0	NA	NA	NA	NA	NA	AC003071.2
1.48253	-0.00458826	0.0529314	-0.0870013	0.93067	NA	AC003072.1
0	NA	NA	NA	NA	NA	AC003079.1
0.334514	-0.0112038	0.0250526	-0.472669	0.63645	NA	AC003080.1
0	NA	NA	NA	NA	NA	AC003084.1
0	NA	NA	NA	NA	NA	AC003087.1
0	NA	NA	NA	NA	NA	AC003092.1
0	NA	NA	NA	NA	NA	AC003092.2
0	NA	NA	NA	NA	NA	AC003098.1
0	NA	NA	NA	NA	NA	AC003101.1
0.2124	-0.00351833	0.0221402	-0.158911	0.873739	NA	AC003101.2
0	NA	NA	NA	NA	NA	AC003101.3
21.1378	0.236012	0.13626	1.7292	0.0837738	0.455384	AC003102.1
0	NA	NA	NA	NA	NA	AC003658.1
0	NA	NA	NA	NA	NA	AC003659.1
0	NA	NA	NA	NA	NA	AC003666.1
0	NA	NA	NA	NA	NA	AC003669.1
44.8277	0.244599	0.147106	1.66962	0.0949949	0.480737	AC003681.1
0.671398	0.00763692	0.0342927	0.210236	0.833483	NA	AC003682.1
0	NA	NA	NA	NA	NA	AC003684.1
0	NA	NA	NA	NA	NA	AC003685.1
0	NA	NA	NA	NA	NA	AC003685.2
0	NA	NA	NA	NA	NA	AC003686.1
0	NA	NA	NA	NA	NA	AC003687.1
0	NA	NA	NA	NA	NA	AC003688.1
0.127219	-0.00351833	0.0221402	-0.158911	0.873739	NA	AC003688.2
0	NA	NA	NA	NA	NA	AC003950.1
1.95034	0.00825517	0.0589496	0.140036	0.888631	NA	AC003956.1
0	NA	NA	NA	NA	NA	AC003957.1
0	NA	NA	NA	NA	NA	AC003958.1
0	NA	NA	NA	NA	NA	AC003958.2
0.650115	-0.0204456	0.0344919	-0.536794	0.59141	NA	AC003965.1
0	NA	NA	NA	NA	NA	AC003965.2
0.268456	0.00186894	0.0232067	0.0805348	0.935812	NA	AC003968.1
0	NA	NA	NA	NA	NA	AC003973.1
0	NA	NA	NA	NA	NA	AC003973.2
0	NA	NA	NA	NA	NA	AC003973.3
3.41839	0.048737	0.0754412	0.639193	0.522697	NA	AC003975.1
0	NA	NA	NA	NA	NA	AC003982.1
0	NA	NA	NA	NA	NA	AC003984.1
0	NA	NA	NA	NA	NA	AC003985.1
0	NA	NA	NA	NA	NA	AC003985.2
0	NA	NA	NA	NA	NA	AC003986.1
0	NA	NA	NA	NA	NA	AC003986.2
0	NA	NA	NA	NA	NA	AC003986.3
0	NA	NA	NA	NA	NA	AC003988.1
0	NA	NA	NA	NA	NA	AC003989.1
0	NA	NA	NA	NA	NA	AC003989.2
0.486931	0.0258283	0.0290924	0.853213	0.393541	NA	AC003991.1
0.486931	0.0258283	0.0290924	0.853213	0.393541	NA	AC003991.2
0	NA	NA	NA	NA	NA	AC003992.1
0.292686	0.0121372	0.0221402	0.471018	0.637628	NA	AC004000.1
0	NA	NA	NA	NA	NA	AC004004.1
0	NA	NA	NA	NA	NA	AC004006.1
0	NA	NA	NA	NA	NA	AC004009.1
0	NA	NA	NA	NA	NA	AC004009.2
0	NA	NA	NA	NA	NA	AC004009.3
0.122113	-0.00351833	0.0221402	-0.158911	0.873739	NA	AC004012.1
0	NA	NA	NA	NA	NA	AC004014.1
0	NA	NA	NA	NA	NA	AC004014.2
0	NA	NA	NA	NA	NA	AC004016.1
3.98487	0.00452224	0.0833241	0.0541523	0.956814	NA	AC004017.1
0	NA	NA	NA	NA	NA	AC004019.18
0.222714	0.00691865	0.0221402	0.312493	0.754666	NA	AC004022.1
0	NA	NA	NA	NA	NA	AC004022.2
0.999613	0.0143313	0.0408546	0.343396	0.7313	NA	AC004023.1
0.400782	-0.00434707	0.0268995	-0.137534	0.890609	NA	AC004024.1
2.62663	0.0602486	0.0700492	0.86704	0.38592	NA	AC004034.1
1.12444	0.054652	0.0456797	1.29141	0.196563	NA	AC004039.1
0	NA	NA	NA	NA	NA	AC004052.1
0.127219	-0.00351833	0.0221402	-0.158911	0.873739	NA	AC004053.1
0	NA	NA	NA	NA	NA	AC004054.1
0.268456	0.00186894	0.0232067	0.0805348	0.935812	NA	AC004057.1
0	NA	NA	NA	NA	NA	AC004062.1
0	NA	NA	NA	NA	NA	AC004063.1
5.82057	0.0485276	0.0918468	0.533032	0.594011	NA	AC004066.1
0	NA	NA	NA	NA	NA	AC004066.2
5.12032	0.0735745	0.0882978	0.847525	0.396702	NA	AC004067.1
0.292686	0.0121372	0.0221402	0.471018	0.637628	NA	AC004069.1
0	NA	NA	NA	NA	NA	AC004069.2
0	NA	NA	NA	NA	NA	AC004074.1
0.841759	0.00110602	0.0368521	0.0316674	0.974737	NA	AC004076.1
18.3278	-0.0771129	0.13243	-0.583562	0.559515	0.874201	AC004076.2
0	NA	NA	NA	NA	NA	AC004079.1
0	NA	NA	NA	NA	NA	AC004080.1
0	NA	NA	NA	NA	NA	AC004080.2
0	NA	NA	NA	NA	NA	AC004080.3
0	NA	NA	NA	NA	NA	AC004080.4
0	NA	NA	NA	NA	NA	AC004080.5
0	NA	NA	NA	NA	NA	AC004080.6
2.12004	0.0208526	0.0639252	0.326915	0.743732	NA	AC004112.1
0	NA	NA	NA	NA	NA	AC004129.1
0	NA	NA	NA	NA	NA	AC004129.2
0	NA	NA	NA	NA	NA	AC004129.3
3.42903	0.0280097	0.0709423	0.39429	0.693367	NA	AC004130.1
0	NA	NA	NA	NA	NA	AC004134.1
0.883798	-0.00346319	0.0402598	-0.0881545	0.929754	NA	AC004147.1
20.3891	0.0619595	0.13235	0.466289	0.641008	0.904316	AC004147.2
0	NA	NA	NA	NA	NA	AC004147.3
0	NA	NA	NA	NA	NA	AC004147.4
0.2124	-0.00351833	0.0221402	-0.158911	0.873739	NA	AC004147.5
0.33962	-0.0113147	0.0251754	-0.481043	0.630486	NA	AC004148.1
120.514	0.122384	0.143047	0.855812	0.392102	0.786676	AC004148.2
0.122113	-0.00351833	0.0221402	-0.158911	0.873739	NA	AC004156.1
1.54163	0.00945393	0.0495507	0.197657	0.843313	NA	AC004158.1
0.693468	0.0097957	0.0330442	0.276436	0.782213	NA	AC004160.1
0	NA	NA	NA	NA	NA	AC004160.2
0	NA	NA	NA	NA	NA	AC004217.1
0	NA	NA	NA	NA	NA	AC004217.2
3.563	0.0937324	0.0796398	1.20211	0.22932	NA	AC004221.1
0	NA	NA	NA	NA	NA	AC004223.1
0	NA	NA	NA	NA	NA	AC004223.2
0.835998	0.0177271	0.0377106	0.461485	0.644451	NA	AC004223.3
0	NA	NA	NA	NA	NA	AC004224.1
0	NA	NA	NA	NA	NA	AC004224.2
0	NA	NA	NA	NA	NA	AC004231.1
0.194245	0.00691865	0.0221402	0.312493	0.754666	NA	AC004231.3
0	NA	NA	NA	NA	NA	AC004232.1
0	NA	NA	NA	NA	NA	AC004232.2
3.1365	-0.0263541	0.0751932	-0.346872	0.728687	NA	AC004232.3
0.814485	0.0415329	0.0351983	1.28723	0.198013	NA	AC004233.1
9.0701	-0.118147	0.108805	-1.09071	0.275402	NA	AC004233.2
29.165	-0.114977	0.145268	-0.790551	0.429206	0.807025	AC004233.3
0.736263	0.0151293	0.0382258	0.376671	0.706418	NA	AC004233.4
3.27999	0.0195007	0.0749805	0.25782	0.796546	NA	AC004241.1
0.194245	0.00691865	0.0221402	0.312493	0.754666	NA	AC004241.2
8.32447	-0.052618	0.106934	-0.498893	0.617855	NA	AC004241.3
3.24796	-0.0236036	0.075007	-0.315983	0.752015	NA	AC004241.4
0.711066	-0.041663	0.0363453	-1.14765	0.251115	NA	AC004241.5
9.55493	0.0643882	0.114774	0.564147	0.572654	NA	AC004253.1
0.222714	0.00691865	0.0221402	0.312493	0.754666	NA	AC004253.2
0.805448	0.0412362	0.0350776	1.27973	0.200639	NA	AC004257.1
3.38965	-0.136724	0.0758552	-1.89661	0.05788	NA	AC004263.1
2.03191	0.0389528	0.0629486	0.625001	0.53197	NA	AC004264.1
0.249333	-0.00911251	0.0226086	-0.352452	0.724499	NA	AC004264.2
0	NA	NA	NA	NA	NA	AC004381.1
0	NA	NA	NA	NA	NA	AC004381.2
0	NA	NA	NA	NA	NA	AC004381.3
3.84257	-0.0114364	0.0811441	-0.142045	0.887045	NA	AC004383.1
2.94418	0.0341608	0.0725726	0.476754	0.633537	NA	AC004386.1
0	NA	NA	NA	NA	NA	AC004386.2
0	NA	NA	NA	NA	NA	AC004408.1
0	NA	NA	NA	NA	NA	AC004408.2
0	NA	NA	NA	NA	NA	AC004415.1
0	NA	NA	NA	NA	NA	AC004448.1
0.688362	0.0114335	0.035111	0.303184	0.76175	NA	AC004448.2
0	NA	NA	NA	NA	NA	AC004448.3
0.637513	0.0228263	0.0340099	0.648607	0.516592	NA	AC004449.1
10.0081	0.0167725	0.115871	0.144233	0.885317	NA	AC004453.1
0.581457	0.0112869	0.0325366	0.432986	0.665025	NA	AC004453.2
0	NA	NA	NA	NA	NA	AC004458.1
0	NA	NA	NA	NA	NA	AC004460.1
0.435114	0.00263405	0.0275163	0.0957268	0.923738	NA	AC004461.1
4.8955	-0.00944894	0.0897159	-0.105624	0.915881	NA	AC004461.2
2.76037	0.110738	0.0684472	1.72766	0.0840499	NA	AC004466.1
3.62863	0.0183239	0.078581	0.236198	0.813279	NA	AC004466.2
1.76826	0.0512785	0.0564222	0.947431	0.343419	NA	AC004466.3
0.122113	-0.00351833	0.0221402	-0.158911	0.873739	NA	AC004467.1
0.244226	-0.00873679	0.0221402	-0.339719	0.734068	NA	AC004470.1
0.992342	-0.00499355	0.0395892	-0.132304	0.894744	NA	AC004471.1
0.462701	0.0122832	0.0303565	0.377206	0.706021	NA	AC004471.2
11.7849	0.166204	0.121921	1.36527	0.172167	NA	AC004477.1
0	NA	NA	NA	NA	NA	AC004477.2
9.07049	0.0175197	0.11214	0.156824	0.875384	NA	AC004477.3
1.63202	0.0277214	0.049863	0.590105	0.55512	NA	AC004485.1
0.122113	-0.00351833	0.0221402	-0.158911	0.873739	NA	AC004486.1
1.16671	-0.0154479	0.0425867	-0.377084	0.706112	NA	AC004490.1
1.58486	-0.0124464	0.0547773	-0.224099	0.82268	NA	AC004491.1
4.2891	-0.0279343	0.0848619	-0.328787	0.742317	NA	AC004492.1
1.04045	0.0303181	0.0435707	0.705092	0.480753	NA	AC004494.1
0	NA	NA	NA	NA	NA	AC004494.2
0	NA	NA	NA	NA	NA	AC004520.1
0	NA	NA	NA	NA	NA	AC004522.1
3.764	0.0212794	0.0805508	0.264481	0.791409	NA	AC004522.2
0	NA	NA	NA	NA	NA	AC004528.1
0	NA	NA	NA	NA	NA	AC004528.2
8.33151	0.0391472	0.107662	0.359963	0.718875	NA	AC004540.1
1.77064	0.00482371	0.0593293	0.0812114	0.935274	NA	AC004540.2
0	NA	NA	NA	NA	NA	AC004542.1
0	NA	NA	NA	NA	NA	AC004542.2
0.671398	0.00763692	0.0342927	0.210236	0.833483	NA	AC004543.1
0	NA	NA	NA	NA	NA	AC004551.1
0.5154	0.026757	0.0295939	0.891649	0.372581	NA	AC004552.1
0.127219	-0.00351833	0.0221402	-0.158911	0.873739	NA	AC004554.1
1.38792	-0.0342706	0.0484696	-0.743947	0.456908	NA	AC004554.2
0.82198	0.00131476	0.0373763	0.035426	0.97174	NA	AC004584.1
0.127219	-0.00351833	0.0221402	-0.158911	0.873739	NA	AC004584.2
1.22504	0.0720414	0.0458974	1.89592	0.0579709	NA	AC004584.3
0.222714	0.00691865	0.0221402	0.312493	0.754666	NA	AC004585.1
0	NA	NA	NA	NA	NA	AC004585.2
0	NA	NA	NA	NA	NA	AC004590.1
0.122113	-0.00351833	0.0221402	-0.158911	0.873739	NA	AC004593.1
0	NA	NA	NA	NA	NA	AC004593.2
2.69454	0.0658877	0.0681856	1.00284	0.315937	NA	AC004594.1
0	NA	NA	NA	NA	NA	AC004595.1
1.95132	0.0233861	0.060544	0.394343	0.693328	NA	AC004596.1
0	NA	NA	NA	NA	NA	AC004597.1
3.41864	0.0279581	0.0783216	0.357293	0.720872	NA	AC004623.1
0.254439	-0.00873679	0.0221402	-0.349729	0.726542	NA	AC004637.1
0	NA	NA	NA	NA	NA	AC004655.1
323.301	-0.202387	0.128038	-1.58112	0.11385	0.512307	AC004656.1
0.2124	-0.00351833	0.0221402	-0.158911	0.873739	NA	AC004672.1
0	NA	NA	NA	NA	NA	AC004672.2
0.146343	0.00691865	0.0221402	0.312493	0.754666	NA	AC004673.1
0	NA	NA	NA	NA	NA	AC004674.1
2.10365	-0.0440647	0.0610703	-0.732387	0.463933	NA	AC004678.1
1.98728	-0.0229064	0.0593744	-0.394686	0.693075	NA	AC004678.2
1.33316	-0.0414013	0.0491581	-0.861987	0.388695	NA	AC004687.1
1.99618	0.0207594	0.0591469	0.347275	0.728385	NA	AC004687.2
0	NA	NA	NA	NA	NA	AC004690.1
0.194245	0.00691865	0.0221402	0.312493	0.754666	NA	AC004690.2
0.870229	0.00175097	0.0351659	0.0527097	0.957963	NA	AC004691.1
0	NA	NA	NA	NA	NA	AC004691.2
0.146343	0.00691865	0.0221402	0.312493	0.754666	NA	AC004692.1
0.2124	-0.00351833	0.0221402	-0.158911	0.873739	NA	AC004692.2
1.20407	0.0267998	0.0470094	0.566059	0.571353	NA	AC004696.1
0.656945	0.0238839	0.0343644	0.672871	0.501029	NA	AC004696.2
0	NA	NA	NA	NA	NA	AC004699.1
0	NA	NA	NA	NA	NA	AC004702.1
0	NA	NA	NA	NA	NA	AC004704.1
6.96861	0.106947	0.102946	1.0502	0.293625	NA	AC004706.1
0	NA	NA	NA	NA	NA	AC004706.2
74.7416	-0.0660885	0.150012	-0.441389	0.658932	0.911352	AC004706.3
0.222714	0.00691865	0.0221402	0.312493	0.754666	NA	AC004707.1
0	NA	NA	NA	NA	NA	AC004745.1
0.2124	-0.00351833	0.0221402	-0.158911	0.873739	NA	AC004754.1
1.15106	0.0244431	0.0457638	0.526458	0.59857	NA	AC004765.1
0	NA	NA	NA	NA	NA	AC004769.1
3.31347	-0.00345105	0.0777806	-0.0442197	0.964729	NA	AC004771.1
0.321464	0.00213746	0.0248071	0.0861634	0.931337	NA	AC004771.2
4.97548	0.0358633	0.0904771	0.395519	0.69246	NA	AC004771.3
0	NA	NA	NA	NA	NA	AC004771.4
3.25511	0.0826054	0.0763752	1.09137	0.275109	NA	AC004771.5
0	NA	NA	NA	NA	NA	AC004775.1
0.244226	-0.00873679	0.0221402	-0.339719	0.734068	NA	AC004777.1
0	NA	NA	NA	NA	NA	AC004784.1
0	NA	NA	NA	NA	NA	AC004790.1
0	NA	NA	NA	NA	NA	AC004790.2
7.49257	-0.100574	0.101229	-1.01029	0.312358	NA	AC004801.1
8.25839	-0.0625853	0.101103	-0.630612	0.528294	NA	AC004801.2
0	NA	NA	NA	NA	NA	AC004801.3
0	NA	NA	NA	NA	NA	AC004801.4
0	NA	NA	NA	NA	NA	AC004801.5
3.07229	0.022947	0.0733067	0.309222	0.757153	NA	AC004801.6
1.79757	-0.0357733	0.054613	-0.673006	0.500943	NA	AC004801.7
14.6194	0.169867	0.123811	1.37032	0.170587	0.602178	AC004803.1
0	NA	NA	NA	NA	NA	AC004805.1
0	NA	NA	NA	NA	NA	AC004805.2
0	NA	NA	NA	NA	NA	AC004805.3
0	NA	NA	NA	NA	NA	AC004808.1
0	NA	NA	NA	NA	NA	AC004808.2
0	NA	NA	NA	NA	NA	AC004812.1
29.0405	0.0108538	0.146266	0.0741521	0.940889	0.988202	AC004812.2
50.6645	0.146056	0.150206	0.969419	0.332336	0.75186	AC004816.1
1.19474	0.0167507	0.0460079	0.369703	0.711603	NA	AC004816.2
0	NA	NA	NA	NA	NA	AC004817.1
0	NA	NA	NA	NA	NA	AC004817.2
0	NA	NA	NA	NA	NA	AC004817.3
0.194245	0.00691865	0.0221402	0.312493	0.754666	NA	AC004817.4
0	NA	NA	NA	NA	NA	AC004824.1
0	NA	NA	NA	NA	NA	AC004824.2
0	NA	NA	NA	NA	NA	AC004825.1
6.11525	0.0187939	0.0861209	0.217826	0.827565	NA	AC004825.2
0.292686	0.0121372	0.0221402	0.471018	0.637628	NA	AC004828.1
18.4193	0.359508	0.126048	2.94884	0.00318967	0.0874102	AC004830.1
0	NA	NA	NA	NA	NA	AC004832.1
0	NA	NA	NA	NA	NA	AC004832.2
0	NA	NA	NA	NA	NA	AC004832.3
1.31251	0.000968412	0.0476316	0.0203619	0.983755	NA	AC004832.4
0.414799	0.00952359	0.0273498	0.292719	0.769737	NA	AC004832.5
0.419906	0.0093339	0.0274776	0.294127	0.768661	NA	AC004832.6
3.24418	0.0828976	0.07268	1.17222	0.241111	NA	AC004834.1
0.963116	-0.013231	0.0419642	-0.320159	0.748848	NA	AC004835.1
0	NA	NA	NA	NA	NA	AC004835.2
0.127219	-0.00351833	0.0221402	-0.158911	0.873739	NA	AC004836.1
0	NA	NA	NA	NA	NA	AC004837.1
2.15763	-0.00261966	0.0617232	-0.0426365	0.965991	NA	AC004837.2
0	NA	NA	NA	NA	NA	AC004837.3
0.878692	-0.00360076	0.0420335	-0.0877847	0.930048	NA	AC004839.1
0.674133	-0.0377852	0.0347772	-1.06027	0.28902	NA	AC004840.1
0	NA	NA	NA	NA	NA	AC004840.2
7.73063	0.198195	0.1054	1.92013	0.0548415	NA	AC004846.1
5.89417	0.0685237	0.0949778	0.729353	0.465786	NA	AC004846.2
0	NA	NA	NA	NA	NA	AC004847.1
0	NA	NA	NA	NA	NA	AC004851.1
0	NA	NA	NA	NA	NA	AC004852.1
0	NA	NA	NA	NA	NA	AC004852.2
0	NA	NA	NA	NA	NA	AC004852.3
0	NA	NA	NA	NA	NA	AC004853.1
0	NA	NA	NA	NA	NA	AC004854.1
1.66559	-0.0332199	0.0550415	-0.619667	0.535477	NA	AC004854.2
0	NA	NA	NA	NA	NA	AC004858.1
0	NA	NA	NA	NA	NA	AC004862.1
0	NA	NA	NA	NA	NA	AC004865.1
0.874144	0.0278258	0.0386748	0.874015	0.38211	NA	AC004865.2
0	NA	NA	NA	NA	NA	AC004866.1
0	NA	NA	NA	NA	NA	AC004866.2
0	NA	NA	NA	NA	NA	AC004869.1
0	NA	NA	NA	NA	NA	AC004869.2
0	NA	NA	NA	NA	NA	AC004870.1
0	NA	NA	NA	NA	NA	AC004870.2
0	NA	NA	NA	NA	NA	AC004870.3
0	NA	NA	NA	NA	NA	AC004870.4
0	NA	NA	NA	NA	NA	AC004872.1
0.435114	0.00263405	0.0275163	0.0957268	0.923738	NA	AC004875.1
0.146343	0.00691865	0.0221402	0.312493	0.754666	NA	AC004877.1
0.736263	0.0151293	0.0382258	0.376671	0.706418	NA	AC004877.2
0	NA	NA	NA	NA	NA	AC004878.3
0	NA	NA	NA	NA	NA	AC004878.5
0	NA	NA	NA	NA	NA	AC004878.6
0	NA	NA	NA	NA	NA	AC004878.7
0	NA	NA	NA	NA	NA	AC004882.1
0	NA	NA	NA	NA	NA	AC004882.2
1.02917	-0.0316258	0.0413972	-0.886562	0.375315	NA	AC004884.1
0.2124	-0.00351833	0.0221402	-0.158911	0.873739	NA	AC004884.2
0.146343	0.00691865	0.0221402	0.312493	0.754666	NA	AC004888.1
19.6545	-0.0940707	0.135338	-0.694477	0.487383	0.83897	AC004889.1
11.0649	-0.0308531	0.117761	-0.260549	0.79444	NA	AC004890.1
24.8884	0.390137	0.138458	2.87448	0.00404693	0.102253	AC004890.2
1.46015	0.0084413	0.0532289	0.162865	0.870624	NA	AC004890.3
1.19464	-0.00708099	0.0458445	-0.156361	0.875748	NA	AC004893.1
0	NA	NA	NA	NA	NA	AC004893.2
0.486931	0.0258283	0.0290924	0.853213	0.393541	NA	AC004895.1
1.55803	-0.017913	0.0531313	-0.348267	0.72764	NA	AC004898.1
0.268456	0.00186894	0.0232067	0.0805348	0.935812	NA	AC004899.1
0	NA	NA	NA	NA	NA	AC004899.2
0.786245	-0.0110618	0.0374065	-0.284135	0.776307	NA	AC004900.1
0	NA	NA	NA	NA	NA	AC004906.1
0.244226	-0.00873679	0.0221402	-0.339719	0.734068	NA	AC004908.1
3.38385	0.0107488	0.0771108	0.137865	0.890347	NA	AC004908.2
0	NA	NA	NA	NA	NA	AC004908.3
0.222714	0.00691865	0.0221402	0.312493	0.754666	NA	AC004910.1
0	NA	NA	NA	NA	NA	AC004911.1
0	NA	NA	NA	NA	NA	AC004917.1
4.75307	-0.00148701	0.0854263	-0.0177124	0.985868	NA	AC004918.1
28.6937	0.122432	0.145052	0.841386	0.400132	0.792189	AC004918.3
0	NA	NA	NA	NA	NA	AC004920.1
0	NA	NA	NA	NA	NA	AC004921.1
0.127219	-0.00351833	0.0221402	-0.158911	0.873739	NA	AC004922.1
2.02008	0.0126025	0.0595845	0.20939	0.834144	NA	AC004923.1
0	NA	NA	NA	NA	NA	AC004923.2
0	NA	NA	NA	NA	NA	AC004923.3
5.33343	0.0684571	0.0895167	0.763087	0.445411	NA	AC004923.4
0	NA	NA	NA	NA	NA	AC004924.1
1.80029	0.00471816	0.0551211	0.0857282	0.931682	NA	AC004925.1
0	NA	NA	NA	NA	NA	AC004930.1
0	NA	NA	NA	NA	NA	AC004936.1
0	NA	NA	NA	NA	NA	AC004938.1
0.358743	0.00230166	0.0257354	0.0894353	0.928736	NA	AC004941.1
0.486931	0.0258283	0.0290924	0.853213	0.393541	NA	AC004941.2
12.1881	-0.114602	0.122411	-0.937295	0.348607	NA	AC004943.1
48.8107	0.0182719	0.150655	0.121362	0.903404	0.978	AC004943.2
0.33962	-0.0113147	0.0251754	-0.481043	0.630486	NA	AC004943.3
0	NA	NA	NA	NA	NA	AC004944.1
0	NA	NA	NA	NA	NA	AC004945.1
0	NA	NA	NA	NA	NA	AC004946.1
0	NA	NA	NA	NA	NA	AC004947.1
0.334514	-0.0112038	0.0250526	-0.472669	0.63645	NA	AC004948.1
0	NA	NA	NA	NA	NA	AC004949.1
1.25895	-0.0351247	0.0497454	-0.725565	0.468105	NA	AC004951.1
2.49173	-0.0266397	0.0624263	-0.429316	0.667693	NA	AC004951.2
0.222714	0.00691865	0.0221402	0.312493	0.754666	NA	AC004951.3
1.0484	0.00755065	0.0432502	0.17745	0.859155	NA	AC004951.4
0	NA	NA	NA	NA	NA	AC004965.1
6.59935	0.0578278	0.0978778	0.590404	0.55492	NA	AC004967.1
7.78629	0.0470254	0.103139	0.458298	0.646739	NA	AC004967.2
0.122113	-0.00351833	0.0221402	-0.158911	0.873739	NA	AC004969.1
0	NA	NA	NA	NA	NA	AC004972.1
0	NA	NA	NA	NA	NA	AC004973.1
0	NA	NA	NA	NA	NA	AC004974.1
1.559	0.0231735	0.0532092	0.441911	0.658554	NA	AC004975.1
0	NA	NA	NA	NA	NA	AC004975.2
18.2207	-0.0653771	0.131652	-0.496461	0.619569	0.896567	AC004980.1
0.661185	0.00806307	0.0341155	0.222457	0.823958	NA	AC004980.2
0	NA	NA	NA	NA	NA	AC004980.3
0	NA	NA	NA	NA	NA	AC004980.4
5.8823	0.0176573	0.093344	0.187398	0.851349	NA	AC004982.1
19.7432	0.242414	0.138001	1.76317	0.0778722	0.440551	AC004982.2
0.2124	-0.00351833	0.0221402	-0.158911	0.873739	NA	AC004986.1
0.146343	0.00691865	0.0221402	0.312493	0.754666	NA	AC004987.1
157.132	-0.0454866	0.137623	-0.3305	0.741022	0.933142	AC004987.2
0	NA	NA	NA	NA	NA	AC004987.3
0	NA	NA	NA	NA	NA	AC004987.4
0.381658	-0.0150074	0.0243965	-0.530101	0.596042	NA	AC004988.1
3.69335	-0.0128556	0.0759531	-0.169896	0.865092	NA	AC004990.1
0	NA	NA	NA	NA	NA	AC004994.1
0	NA	NA	NA	NA	NA	AC004997.1
1.18474	-0.0230284	0.0460514	-0.518798	0.603902	NA	AC005000.1
0	NA	NA	NA	NA	NA	AC005000.2
0.321464	0.00213746	0.0248071	0.0861634	0.931337	NA	AC005002.1
0	NA	NA	NA	NA	NA	AC005002.2
0.316358	0.00211253	0.024663	0.085656	0.93174	NA	AC005005.1
0	NA	NA	NA	NA	NA	AC005005.2
3.69078	-0.0207156	0.0810896	-0.256535	0.797538	NA	AC005005.3
1.52166	0.0152345	0.046862	0.340264	0.733657	NA	AC005005.4
0.488453	-0.0206711	0.0268061	-0.693728	0.487853	NA	AC005006.1
0	NA	NA	NA	NA	NA	AC005008.1
0	NA	NA	NA	NA	NA	AC005008.2
0.552988	0.0109735	0.0321397	0.398949	0.689931	NA	AC005009.1
0.273562	0.0018957	0.0233712	0.0811127	0.935352	NA	AC005009.2
0	NA	NA	NA	NA	NA	AC005011.1
0.194245	0.00691865	0.0221402	0.312493	0.754666	NA	AC005013.1
1.08772	-0.0372082	0.0431014	-0.996175	0.319165	NA	AC005014.1
1.54323	0.000461879	0.0499257	0.00919396	0.992664	NA	AC005014.2
0	NA	NA	NA	NA	NA	AC005014.3
0.462701	0.0122832	0.0303565	0.377206	0.706021	NA	AC005019.1
0	NA	NA	NA	NA	NA	AC005019.2
0.542019	0.00310038	0.0321483	0.079436	0.936686	NA	AC005020.1
0	NA	NA	NA	NA	NA	AC005020.2
0.461733	-0.0238495	0.0303015	-0.746818	0.455173	NA	AC005021.1
0	NA	NA	NA	NA	NA	AC005033.1
0	NA	NA	NA	NA	NA	AC005034.1
0.775702	0.0242614	0.0384401	0.764796	0.444393	NA	AC005034.2
129.733	-0.0869467	0.140555	-0.618784	0.536059	0.863617	AC005034.3
0.807427	-0.00653695	0.039242	-0.167079	0.867308	NA	AC005034.4
9.50485	0.0638522	0.11237	0.572923	0.566697	NA	AC005034.5
0.533864	-0.00670919	0.0315707	-0.250727	0.802025	NA	AC005037.1
0	NA	NA	NA	NA	NA	AC005037.2
0	NA	NA	NA	NA	NA	AC005040.1
0.127219	-0.00351833	0.0221402	-0.158911	0.873739	NA	AC005041.1
0	NA	NA	NA	NA	NA	AC005041.2
0.222714	0.00691865	0.0221402	0.312493	0.754666	NA	AC005041.3
2.83817	0.0301501	0.0711897	0.426053	0.670069	NA	AC005042.1
0	NA	NA	NA	NA	NA	AC005042.2
0	NA	NA	NA	NA	NA	AC005042.3
3.59769	0.020986	0.0785695	0.267528	0.789063	NA	AC005046.1
0	NA	NA	NA	NA	NA	AC005048.1
0	NA	NA	NA	NA	NA	AC005050.1
1.20897	-0.00621813	0.0479538	-0.131635	0.895273	NA	AC005052.1
21.0589	0.0958678	0.133913	0.711941	0.476501	0.833662	AC005062.1
0.503772	-0.0253284	0.0294614	-0.781516	0.434499	NA	AC005064.1
0	NA	NA	NA	NA	NA	AC005066.1
0	NA	NA	NA	NA	NA	AC005070.1
0.2124	-0.00351833	0.0221402	-0.158911	0.873739	NA	AC005070.2
11.4357	0.0944377	0.119699	0.791149	0.428857	NA	AC005070.3
0.122113	-0.00351833	0.0221402	-0.158911	0.873739	NA	AC005071.1
0.435114	0.00263405	0.0275163	0.0957268	0.923738	NA	AC005072.1
18.9945	-0.0265867	0.136411	-0.195593	0.844929	0.96214	AC005076.1
0.64262	0.0226488	0.0341135	0.650258	0.515526	NA	AC005077.1
5.2752	0.123445	0.0915255	1.38854	0.164972	NA	AC005077.2
0	NA	NA	NA	NA	NA	AC005077.3
21.9513	-0.0681616	0.133952	-0.506842	0.612265	0.891421	AC005077.4
0	NA	NA	NA	NA	NA	AC005077.9
1.63897	-0.00458053	0.0535271	-0.0878034	0.930033	NA	AC005082.1
0	NA	NA	NA	NA	NA	AC005082.2
23.1314	-0.15237	0.141923	-1.07237	0.283554	0.715338	AC005083.1
0	NA	NA	NA	NA	NA	AC005084.1
0.127219	-0.00351833	0.0221402	-0.158911	0.873739	NA	AC005086.1
0	NA	NA	NA	NA	NA	AC005086.2
0.273562	0.0018957	0.0233712	0.0811127	0.935352	NA	AC005086.3
0	NA	NA	NA	NA	NA	AC005086.4
0	NA	NA	NA	NA	NA	AC005088.1
3.80595	0.0497667	0.0804222	0.62286	0.533377	NA	AC005089.1
0	NA	NA	NA	NA	NA	AC005090.1
0.92954	-0.015561	0.0438611	-0.356376	0.721559	NA	AC005091.1
0	NA	NA	NA	NA	NA	AC005094.1
0.480857	-0.00689041	0.0305106	-0.237307	0.812418	NA	AC005096.1
0.273562	0.0018957	0.0233712	0.0811127	0.935352	NA	AC005099.1
0	NA	NA	NA	NA	NA	AC005100.1
0.376552	-0.0175793	0.02647	-0.574078	0.565915	NA	AC005102.1
13.0115	-0.081885	0.122164	-0.669997	0.502859	0.846326	AC005104.1
0.273562	0.0018957	0.0233712	0.0811127	0.935352	NA	AC005104.2
0.127219	-0.00351833	0.0221402	-0.158911	0.873739	NA	AC005105.1
0	NA	NA	NA	NA	NA	AC005144.1
0	NA	NA	NA	NA	NA	AC005150.1
0.651429	0.0140589	0.0321342	0.544169	0.586325	NA	AC005154.1
0.349934	0.00227256	0.0255735	0.088864	0.92919	NA	AC005154.2
0	NA	NA	NA	NA	NA	AC005154.3
0.388489	0.0148183	0.0244489	0.61355	0.539513	NA	AC005154.4
0	NA	NA	NA	NA	NA	AC005154.5
0.254439	-0.00873679	0.0221402	-0.349729	0.726542	NA	AC005156.1
0.194245	0.00691865	0.0221402	0.312493	0.754666	NA	AC005159.1
0	NA	NA	NA	NA	NA	AC005160.1
0	NA	NA	NA	NA	NA	AC005161.1
0.292686	0.0121372	0.0221402	0.471018	0.637628	NA	AC005162.1
0.2124	-0.00351833	0.0221402	-0.158911	0.873739	NA	AC005162.2
1.48729	-0.00320584	0.0495113	-0.0638863	0.949061	NA	AC005162.3
1.06262	-0.0154225	0.0435193	-0.366567	0.713942	NA	AC005165.1
2.80297	0.00550295	0.0674861	0.0809817	0.935457	NA	AC005165.2
0	NA	NA	NA	NA	NA	AC005176.1
0	NA	NA	NA	NA	NA	AC005176.2
0	NA	NA	NA	NA	NA	AC005178.1
4.24982	-0.00987329	0.0780003	-0.127619	0.898451	NA	AC005180.1
3.32325	-0.112992	0.0753483	-1.55667	0.119549	NA	AC005180.2
0	NA	NA	NA	NA	NA	AC005181.1
0.493559	-0.024786	0.0292603	-0.767385	0.442852	NA	AC005183.1
0	NA	NA	NA	NA	NA	AC005185.1
0	NA	NA	NA	NA	NA	AC005186.1
0	NA	NA	NA	NA	NA	AC005189.1
0	NA	NA	NA	NA	NA	AC005191.1
0	NA	NA	NA	NA	NA	AC005195.1
2.49073	-0.0109532	0.0668084	-0.161056	0.872049	NA	AC005197.1
0	NA	NA	NA	NA	NA	AC005208.1
0	NA	NA	NA	NA	NA	AC005209.1
0	NA	NA	NA	NA	NA	AC005215.1
0.650871	-0.01471	0.0341542	-0.450888	0.65207	NA	AC005220.1
11.9691	0.0814325	0.121982	0.666865	0.504858	NA	AC005224.1
0.369057	0.0168313	0.0260449	0.633171	0.526622	NA	AC005224.2
0.613182	-0.0167392	0.0333715	-0.453215	0.650394	NA	AC005224.3
0.688362	0.0114335	0.035111	0.303184	0.76175	NA	AC005225.1
0.650871	-0.01471	0.0341542	-0.450888	0.65207	NA	AC005225.2
0	NA	NA	NA	NA	NA	AC005225.3
1.19005	0.00838433	0.0436407	0.188537	0.850456	NA	AC005225.4
7.33841	-0.0378496	0.104404	-0.362329	0.717106	NA	AC005229.1
0	NA	NA	NA	NA	NA	AC005229.2
0	NA	NA	NA	NA	NA	AC005229.3
28.3109	0.101673	0.144342	0.704851	0.480903	0.836183	AC005229.4
0	NA	NA	NA	NA	NA	AC005230.1
0.349934	0.00227256	0.0255735	0.088864	0.92919	NA	AC005232.1
0.334514	-0.0112038	0.0250526	-0.472669	0.63645	NA	AC005234.1
0	NA	NA	NA	NA	NA	AC005237.1
0.146343	0.00691865	0.0221402	0.312493	0.754666	NA	AC005237.2
0.349934	0.00227256	0.0255735	0.088864	0.92919	NA	AC005244.1
0	NA	NA	NA	NA	NA	AC005244.2
0	NA	NA	NA	NA	NA	AC005252.1
0	NA	NA	NA	NA	NA	AC005252.2
0	NA	NA	NA	NA	NA	AC005252.3
14.5846	-0.0137939	0.126218	-0.109963	0.912439	0.980679	AC005253.1
0	NA	NA	NA	NA	NA	AC005253.2
0	NA	NA	NA	NA	NA	AC005255.1
0	NA	NA	NA	NA	NA	AC005256.1
0	NA	NA	NA	NA	NA	AC005258.1
112.951	-0.36599	0.150682	-2.43236	0.0150008	0.214138	AC005261.1
3.91448	0.070242	0.0796558	0.892092	0.372344	NA	AC005261.2
19.1056	-0.176534	0.136656	-1.29481	0.195386	0.629588	AC005261.3
3.60162	-0.047652	0.0746879	-0.654954	0.512497	NA	AC005261.4
4.50878	-0.113969	0.0854884	-1.36802	0.171306	NA	AC005261.5
0.127219	-0.00351833	0.0221402	-0.158911	0.873739	NA	AC005262.1
0	NA	NA	NA	NA	NA	AC005262.2
0.122113	-0.00351833	0.0221402	-0.158911	0.873739	NA	AC005264.1
0.400782	-0.00434707	0.0268995	-0.137534	0.890609	NA	AC005274.1
0	NA	NA	NA	NA	NA	AC005277.1
1.43679	0.00650181	0.0512285	0.129745	0.896768	NA	AC005277.2
0	NA	NA	NA	NA	NA	AC005280.1
0	NA	NA	NA	NA	NA	AC005280.2
0	NA	NA	NA	NA	NA	AC005280.3
0	NA	NA	NA	NA	NA	AC005281.1
0	NA	NA	NA	NA	NA	AC005284.1
142.128	-0.168548	0.139518	-1.20782	0.227118	0.661335	AC005288.1
0	NA	NA	NA	NA	NA	AC005291.1
0	NA	NA	NA	NA	NA	AC005291.2
0.146343	0.00691865	0.0221402	0.312493	0.754666	NA	AC005293.1
0	NA	NA	NA	NA	NA	AC005294.1
0	NA	NA	NA	NA	NA	AC005296.1
0	NA	NA	NA	NA	NA	AC005297.1
0	NA	NA	NA	NA	NA	AC005297.2
0	NA	NA	NA	NA	NA	AC005297.3
0.146343	0.00691865	0.0221402	0.312493	0.754666	NA	AC005300.1
0	NA	NA	NA	NA	NA	AC005301.1
0	NA	NA	NA	NA	NA	AC005303.1
0	NA	NA	NA	NA	NA	AC005304.1
0	NA	NA	NA	NA	NA	AC005304.2
0	NA	NA	NA	NA	NA	AC005304.3
0.2124	-0.00351833	0.0221402	-0.158911	0.873739	NA	AC005306.1
15.8783	-0.148265	0.131338	-1.12995	0.258496	0.691726	AC005307.1
0	NA	NA	NA	NA	NA	AC005323.1
0	NA	NA	NA	NA	NA	AC005323.2
0	NA	NA	NA	NA	NA	AC005324.1
0	NA	NA	NA	NA	NA	AC005324.2
0	NA	NA	NA	NA	NA	AC005324.3
0	NA	NA	NA	NA	NA	AC005324.4
0.321464	0.00213746	0.0248071	0.0861634	0.931337	NA	AC005324.5
0	NA	NA	NA	NA	NA	AC005324.6
10.5411	0.0597061	0.10532	0.579246	0.562423	NA	AC005326.1
0.807427	-0.00653695	0.039242	-0.167079	0.867308	NA	AC005329.1
0	NA	NA	NA	NA	NA	AC005329.2
0.788963	0.0308845	0.0372277	0.849886	0.395388	NA	AC005329.3
4.4982	-0.0268577	0.088226	-0.305546	0.75995	NA	AC005330.1
2.18293	-0.00447627	0.0581779	-0.0780301	0.937804	NA	AC005332.1
0.2124	-0.00351833	0.0221402	-0.158911	0.873739	NA	AC005332.2
1.86429	-0.0047587	0.0609797	-0.077575	0.938166	NA	AC005332.3
26.318	-0.0160422	0.142426	-0.112149	0.910706	0.980349	AC005332.4
4.34949	-0.0805347	0.0853945	-0.961111	0.336496	NA	AC005332.5
38.0051	0.164394	0.149082	1.10007	0.271303	0.704511	AC005332.6
0.510602	0.0121188	0.0292088	0.412551	0.679935	NA	AC005332.7
0.637513	0.0228263	0.0340099	0.648607	0.516592	NA	AC005336.1
4.3118	-0.0845128	0.0859659	-0.998673	0.317953	NA	AC005336.2
0	NA	NA	NA	NA	NA	AC005336.3
0	NA	NA	NA	NA	NA	AC005339.1
0.2124	-0.00351833	0.0221402	-0.158911	0.873739	NA	AC005341.1
0.788405	0.000361655	0.0389211	0.00927739	0.992598	NA	AC005342.1
0	NA	NA	NA	NA	NA	AC005342.2
1.78338	-0.0738789	0.0549315	-1.60052	0.109483	NA	AC005343.1
0	NA	NA	NA	NA	NA	AC005344.1
0	NA	NA	NA	NA	NA	AC005345.1
0.194245	0.00691865	0.0221402	0.312493	0.754666	NA	AC005351.1
5.60276	0.0764405	0.0945911	0.817647	0.413559	NA	AC005355.1
0	NA	NA	NA	NA	NA	AC005357.1
0.127219	-0.00351833	0.0221402	-0.158911	0.873739	NA	AC005357.2
0.122113	-0.00351833	0.0221402	-0.158911	0.873739	NA	AC005358.1
0.5154	0.026757	0.0295939	0.891649	0.372581	NA	AC005358.2
0	NA	NA	NA	NA	NA	AC005363.1
0.804172	0.0226656	0.0369604	0.754873	0.450325	NA	AC005363.2
0	NA	NA	NA	NA	NA	AC005370.1
0	NA	NA	NA	NA	NA	AC005375.1
0	NA	NA	NA	NA	NA	AC005377.1
0.358743	0.00230166	0.0257354	0.0894353	0.928736	NA	AC005379.1
0.49117	0.0126826	0.0308448	0.412255	0.680152	NA	AC005381.1
0.194245	0.00691865	0.0221402	0.312493	0.754666	NA	AC005383.1
3.89262	0.104835	0.0821419	1.28899	0.197401	NA	AC005387.1
3.68242	0.0636302	0.07539	0.881198	0.378211	NA	AC005387.2
0.334514	-0.0112038	0.0250526	-0.472669	0.63645	NA	AC005391.1
0	NA	NA	NA	NA	NA	AC005392.1
0.222714	0.00691865	0.0221402	0.312493	0.754666	NA	AC005392.2
0	NA	NA	NA	NA	NA	AC005392.3
1.76945	0.0311508	0.0568233	0.538871	0.589976	NA	AC005393.1
0	NA	NA	NA	NA	NA	AC005394.1
5.48207	0.0722154	0.0942826	0.765353	0.444061	NA	AC005394.2
0	NA	NA	NA	NA	NA	AC005399.1
0.122113	-0.00351833	0.0221402	-0.158911	0.873739	NA	AC005410.1
0.316358	0.00211253	0.024663	0.085656	0.93174	NA	AC005410.2
0	NA	NA	NA	NA	NA	AC005412.1
0.671398	0.00763692	0.0342927	0.210236	0.833483	NA	AC005414.1
3.07229	0.022947	0.0733067	0.309222	0.757153	NA	AC005476.1
2.59262	0.00557957	0.0678536	0.0823405	0.934376	NA	AC005476.2
0	NA	NA	NA	NA	NA	AC005477.1
1.94395	-0.0147848	0.0586065	-0.252668	0.800525	NA	AC005479.1
0.633274	0.0343071	0.0321299	1.08048	0.279927	NA	AC005479.2
0.581457	0.0112869	0.0325366	0.432986	0.665025	NA	AC005480.1
0	NA	NA	NA	NA	NA	AC005480.2
1.149	0.0274233	0.0443683	0.655319	0.512263	NA	AC005481.1
0	NA	NA	NA	NA	NA	AC005482.1
0	NA	NA	NA	NA	NA	AC005486.1
0	NA	NA	NA	NA	NA	AC005487.1
0	NA	NA	NA	NA	NA	AC005488.1
0	NA	NA	NA	NA	NA	AC005493.1
0	NA	NA	NA	NA	NA	AC005495.1
0	NA	NA	NA	NA	NA	AC005498.1
0.60297	-0.0162042	0.0331963	-0.4406	0.659503	NA	AC005498.2
3.10498	0.0245524	0.0714046	0.34783	0.727968	NA	AC005498.3
0	NA	NA	NA	NA	NA	AC005513.1
0	NA	NA	NA	NA	NA	AC005514.1
0	NA	NA	NA	NA	NA	AC005515.1
0	NA	NA	NA	NA	NA	AC005518.1
0	NA	NA	NA	NA	NA	AC005518.2
52.9485	0.219366	0.149681	1.47063	0.141392	0.558055	AC005519.1
0	NA	NA	NA	NA	NA	AC005520.1
0	NA	NA	NA	NA	NA	AC005520.2
0.321464	0.00213746	0.0248071	0.0861634	0.931337	NA	AC005520.3
0	NA	NA	NA	NA	NA	AC005520.4
1.42582	-0.000193272	0.0538215	-0.00357611	0.997147	NA	AC005520.5
0	NA	NA	NA	NA	NA	AC005521.1
0.127219	-0.00351833	0.0221402	-0.158911	0.873739	NA	AC005522.1
0.122113	-0.00351833	0.0221402	-0.158911	0.873739	NA	AC005523.1
0	NA	NA	NA	NA	NA	AC005523.2
5.11781	0.06394	0.0899002	0.710484	0.477404	NA	AC005524.1
0.358743	0.00230166	0.0257354	0.0894353	0.928736	NA	AC005529.1
0.493559	-0.024786	0.0292603	-0.767385	0.442852	NA	AC005531.1
0.595027	0.00483428	0.0330957	0.125272	0.900308	NA	AC005532.1
0	NA	NA	NA	NA	NA	AC005532.2
0.438471	-0.00377515	0.0277821	-0.130967	0.895801	NA	AC005534.1
1.32834	0.0340756	0.0502938	0.682686	0.494805	NA	AC005534.2
1.16257	0.0236678	0.0477111	0.497134	0.619094	NA	AC005537.1
0	NA	NA	NA	NA	NA	AC005538.1
0	NA	NA	NA	NA	NA	AC005538.2
0.127219	-0.00351833	0.0221402	-0.158911	0.873739	NA	AC005539.1
0.127219	-0.00351833	0.0221402	-0.158911	0.873739	NA	AC005540.1
0.438471	-0.00377515	0.0277821	-0.130967	0.895801	NA	AC005544.1
0	NA	NA	NA	NA	NA	AC005544.2
2.05964	-0.0630222	0.0620815	-1.04407	0.296452	NA	AC005546.1
0.194245	0.00691865	0.0221402	0.312493	0.754666	NA	AC005548.1
0	NA	NA	NA	NA	NA	AC005549.1
0	NA	NA	NA	NA	NA	AC005549.2
0	NA	NA	NA	NA	NA	AC005549.3
0.146343	0.00691865	0.0221402	0.312493	0.754666	NA	AC005550.1
0	NA	NA	NA	NA	NA	AC005550.2
0	NA	NA	NA	NA	NA	AC005551.1
0	NA	NA	NA	NA	NA	AC005552.1
0	NA	NA	NA	NA	NA	AC005559.1
0.570797	-0.0114161	0.0328232	-0.360267	0.718647	NA	AC005578.1
0	NA	NA	NA	NA	NA	AC005580.1
8.88654	0.053007	0.112108	0.472034	0.636903	NA	AC005586.1
1.65734	0.00678957	0.0570137	0.119649	0.904761	NA	AC005586.2
0	NA	NA	NA	NA	NA	AC005587.1
0	NA	NA	NA	NA	NA	AC005588.1
30.4801	0.393479	0.141829	2.79351	0.005214	0.118773	AC005592.1
0.122113	-0.00351833	0.0221402	-0.158911	0.873739	NA	AC005593.1
0	NA	NA	NA	NA	NA	AC005597.1
0	NA	NA	NA	NA	NA	AC005606.1
0.146343	0.00691865	0.0221402	0.312493	0.754666	NA	AC005606.2
0	NA	NA	NA	NA	NA	AC005609.1
0	NA	NA	NA	NA	NA	AC005609.3
0	NA	NA	NA	NA	NA	AC005609.4
0.273562	0.0018957	0.0233712	0.0811127	0.935352	NA	AC005609.5
0	NA	NA	NA	NA	NA	AC005614.1
0	NA	NA	NA	NA	NA	AC005614.2
0	NA	NA	NA	NA	NA	AC005616.1
12.0723	0.163595	0.115876	1.41242	0.157827	NA	AC005618.1
0	NA	NA	NA	NA	NA	AC005618.2
0	NA	NA	NA	NA	NA	AC005618.3
0	NA	NA	NA	NA	NA	AC005621.1
0.194245	0.00691865	0.0221402	0.312493	0.754666	NA	AC005622.1
0.146343	0.00691865	0.0221402	0.312493	0.754666	NA	AC005625.1
0	NA	NA	NA	NA	NA	AC005631.1
0	NA	NA	NA	NA	NA	AC005632.1
2.963	0.0676394	0.0716538	0.969305	0.332393	NA	AC005632.2
0	NA	NA	NA	NA	NA	AC005632.3
0	NA	NA	NA	NA	NA	AC005632.4
1.75685	0.00312966	0.0531243	0.0598551	0.952271	NA	AC005670.1
0	NA	NA	NA	NA	NA	AC005670.2
0	NA	NA	NA	NA	NA	AC005674.1
111.162	0.0854188	0.144364	0.591698	0.554053	0.871107	AC005674.2
2.1546	-0.029429	0.0605919	-0.484761	0.627846	NA	AC005682.1
0	NA	NA	NA	NA	NA	AC005686.1
0	NA	NA	NA	NA	NA	AC005691.1
0	NA	NA	NA	NA	NA	AC005692.1
0	NA	NA	NA	NA	NA	AC005692.2
0.2124	-0.00351833	0.0221402	-0.158911	0.873739	NA	AC005692.3
2.23608	-0.029997	0.0650866	-0.46373	0.642842	NA	AC005695.1
0	NA	NA	NA	NA	NA	AC005695.2
0.194245	0.00691865	0.0221402	0.312493	0.754666	NA	AC005695.3
0.462701	0.0122832	0.0303565	0.377206	0.706021	NA	AC005696.1
0	NA	NA	NA	NA	NA	AC005696.2
0.528758	-0.00645374	0.0314788	-0.243282	0.807787	NA	AC005696.3
65.2638	0.432691	0.150661	2.87032	0.00410063	0.10299	AC005696.4
0	NA	NA	NA	NA	NA	AC005697.1
0.793858	-0.000804634	0.0361874	-0.0231699	0.981515	NA	AC005697.2
0.254439	-0.00873679	0.0221402	-0.349729	0.726542	NA	AC005699.1
0	NA	NA	NA	NA	NA	AC005701.1
2.42401	0.0255084	0.0627327	0.41404	0.678845	NA	AC005702.1
0.424801	-0.0111729	0.0250183	-0.56326	0.573258	NA	AC005702.2
2.72581	0.0276728	0.0678053	0.411313	0.680843	NA	AC005702.3
4.11363	-0.0214288	0.0839115	-0.253057	0.800224	NA	AC005702.4
0	NA	NA	NA	NA	NA	AC005703.1
0	NA	NA	NA	NA	NA	AC005703.2
0	NA	NA	NA	NA	NA	AC005703.3
0.146343	0.00691865	0.0221402	0.312493	0.754666	NA	AC005703.4
0	NA	NA	NA	NA	NA	AC005703.5
0	NA	NA	NA	NA	NA	AC005703.6
0	NA	NA	NA	NA	NA	AC005722.1
0.249333	-0.00911251	0.0226086	-0.352452	0.724499	NA	AC005722.2
0	NA	NA	NA	NA	NA	AC005722.3
1.55304	-0.00882271	0.0554806	-0.158348	0.874183	NA	AC005725.1
37.8726	0.0448251	0.148878	0.301902	0.762727	0.939807	AC005726.1
1.60279	0.0228803	0.052986	0.440672	0.659451	NA	AC005726.2
18.8785	-0.0154672	0.136589	-0.113157	0.909906	0.980056	AC005726.3
0	NA	NA	NA	NA	NA	AC005726.4
0	NA	NA	NA	NA	NA	AC005726.5
0	NA	NA	NA	NA	NA	AC005730.1
0.737785	-0.037257	0.0343092	-1.10627	0.268608	NA	AC005730.2
0.349934	0.00227256	0.0255735	0.088864	0.92919	NA	AC005730.3
3.32944	-0.0203664	0.0745087	-0.276049	0.78251	NA	AC005736.1
0	NA	NA	NA	NA	NA	AC005736.2
1.02742	-0.0401423	0.0445864	-0.992798	0.320808	NA	AC005740.1
0	NA	NA	NA	NA	NA	AC005740.2
0.273562	0.0018957	0.0233712	0.0811127	0.935352	NA	AC005740.3
0.249333	-0.00911251	0.0226086	-0.352452	0.724499	NA	AC005740.4
0	NA	NA	NA	NA	NA	AC005741.1
1.23765	0.0269825	0.0468827	0.574905	0.565356	NA	AC005746.1
0	NA	NA	NA	NA	NA	AC005746.2
0.194245	0.00691865	0.0221402	0.312493	0.754666	NA	AC005746.3
1.27361	-0.0147542	0.0471178	-0.310035	0.756534	NA	AC005753.1
0	NA	NA	NA	NA	NA	AC005757.1
0	NA	NA	NA	NA	NA	AC005758.1
1.64703	-0.0177468	0.054539	-0.327039	0.743639	NA	AC005759.1
0	NA	NA	NA	NA	NA	AC005771.1
0.321464	0.00213746	0.0248071	0.0861634	0.931337	NA	AC005772.1
0	NA	NA	NA	NA	NA	AC005774.1
1.25895	-0.0351247	0.0497454	-0.725565	0.468105	NA	AC005775.1
2.27702	0.00904858	0.0638269	0.144197	0.885345	NA	AC005776.1
7.17969	0.0577564	0.104136	0.557242	0.577362	NA	AC005776.2
0	NA	NA	NA	NA	NA	AC005777.1
0.194245	0.00691865	0.0221402	0.312493	0.754666	NA	AC005779.1
0	NA	NA	NA	NA	NA	AC005779.2
0	NA	NA	NA	NA	NA	AC005783.1
6.35406	-0.174748	0.0981662	-1.82159	0.0685169	NA	AC005785.1
0.395676	-0.00478247	0.0288012	-0.142671	0.88655	NA	AC005786.1
0	NA	NA	NA	NA	NA	AC005786.2
0	NA	NA	NA	NA	NA	AC005786.3
1.06742	0.000733483	0.0434211	0.017226	0.986256	NA	AC005786.4
0	NA	NA	NA	NA	NA	AC005789.1
1.09044	0.00289671	0.0447281	0.0643293	0.948708	NA	AC005790.1
0.2124	-0.00351833	0.0221402	-0.158911	0.873739	NA	AC005796.1
0	NA	NA	NA	NA	NA	AC005798.1
0.254439	-0.00873679	0.0221402	-0.349729	0.726542	NA	AC005808.1
0.759627	0.0148201	0.0365631	0.388175	0.697887	NA	AC005821.1
13.6346	-0.0015374	0.127255	-0.0120982	0.990347	0.999217	AC005822.1
0	NA	NA	NA	NA	NA	AC005823.1
0	NA	NA	NA	NA	NA	AC005823.2
0	NA	NA	NA	NA	NA	AC005828.1
0	NA	NA	NA	NA	NA	AC005828.2
0	NA	NA	NA	NA	NA	AC005828.3
0.127219	-0.00351833	0.0221402	-0.158911	0.873739	NA	AC005828.4
0	NA	NA	NA	NA	NA	AC005828.5
0	NA	NA	NA	NA	NA	AC005828.6
0	NA	NA	NA	NA	NA	AC005828.7
0.122113	-0.00351833	0.0221402	-0.158911	0.873739	NA	AC005829.1
0.122113	-0.00351833	0.0221402	-0.158911	0.873739	NA	AC005829.2
0.60297	-0.0162042	0.0331963	-0.4406	0.659503	NA	AC005831.1
0.466839	-0.0210806	0.0283953	-0.702109	0.482611	NA	AC005832.1
0.816773	-0.0213385	0.0374815	-0.64818	0.516868	NA	AC005832.2
0.926285	0.0157703	0.0409626	0.401182	0.688286	NA	AC005832.3
0	NA	NA	NA	NA	NA	AC005832.4
22.4409	0.0279174	0.138167	0.203288	0.83891	0.961632	AC005833.1
0	NA	NA	NA	NA	NA	AC005833.2
3.90242	-0.038966	0.0831246	-0.469912	0.638418	NA	AC005837.1
0	NA	NA	NA	NA	NA	AC005837.2
0	NA	NA	NA	NA	NA	AC005837.3
0	NA	NA	NA	NA	NA	AC005838.1
3.55617	0.0439582	0.0797968	0.550412	0.582037	NA	AC005838.2
51.1847	-0.202602	0.149652	-1.35454	0.175564	0.60629	AC005839.1
0.472047	-0.00479489	0.0305016	-0.152375	0.878891	NA	AC005840.1
0.443577	-0.00459758	0.0299124	-0.14893	0.881609	NA	AC005840.2
1.58562	-0.0060114	0.0557044	-0.108008	0.913989	NA	AC005840.3
2.00826	-0.0393257	0.0593735	-0.667698	0.504327	NA	AC005840.4
0	NA	NA	NA	NA	NA	AC005841.1
1.83454	-0.029441	0.0585761	-0.503563	0.614569	NA	AC005842.1
0	NA	NA	NA	NA	NA	AC005845.1
0.194245	0.00691865	0.0221402	0.312493	0.754666	NA	AC005856.1
0	NA	NA	NA	NA	NA	AC005858.1
0	NA	NA	NA	NA	NA	AC005858.2
0	NA	NA	NA	NA	NA	AC005858.3
0.542019	0.00310038	0.0321483	0.079436	0.936686	NA	AC005863.1
1.11022	0.00339792	0.0458011	0.0764084	0.939094	NA	AC005865.1
4.18456	0.0152711	0.0845493	0.181785	0.855752	NA	AC005865.2
0	NA	NA	NA	NA	NA	AC005868.1
0	NA	NA	NA	NA	NA	AC005871.1
0	NA	NA	NA	NA	NA	AC005871.2
0	NA	NA	NA	NA	NA	AC005884.1
0.222714	0.00691865	0.0221402	0.312493	0.754666	NA	AC005884.2
0	NA	NA	NA	NA	NA	AC005899.1
0	NA	NA	NA	NA	NA	AC005899.2
0	NA	NA	NA	NA	NA	AC005899.3
0	NA	NA	NA	NA	NA	AC005899.4
0.127219	-0.00351833	0.0221402	-0.158911	0.873739	NA	AC005899.5
0.381658	-0.0150074	0.0243965	-0.530101	0.596042	NA	AC005899.6
0.33962	-0.0113147	0.0251754	-0.481043	0.630486	NA	AC005899.7
1.1553	0.00911036	0.0456881	0.194424	0.845844	NA	AC005899.8
0	NA	NA	NA	NA	NA	AC005901.1
0	NA	NA	NA	NA	NA	AC005906.1
3.13693	0.09067	0.0747046	1.23595	0.216479	NA	AC005906.2
0	NA	NA	NA	NA	NA	AC005906.3
0.273562	0.0018957	0.0233712	0.0811127	0.935352	NA	AC005908.1
0	NA	NA	NA	NA	NA	AC005908.2
0	NA	NA	NA	NA	NA	AC005909.1
3.28958	-0.0213617	0.0760186	-0.283219	0.777009	NA	AC005911.1
608.996	-0.101988	0.121726	-0.837542	0.402288	0.793125	AC005912.1
0	NA	NA	NA	NA	NA	AC005912.2
0	NA	NA	NA	NA	NA	AC005915.1
0	NA	NA	NA	NA	NA	AC005920.1
0	NA	NA	NA	NA	NA	AC005920.2
0	NA	NA	NA	NA	NA	AC005920.3
0	NA	NA	NA	NA	NA	AC005920.4
0	NA	NA	NA	NA	NA	AC005921.1
0	NA	NA	NA	NA	NA	AC005921.2
1.22647	-0.0121697	0.0494219	-0.245356	0.806181	NA	AC005921.3
0	NA	NA	NA	NA	NA	AC005921.4
0	NA	NA	NA	NA	NA	AC005926.1
0	NA	NA	NA	NA	NA	AC005943.1
0	NA	NA	NA	NA	NA	AC005943.2
0	NA	NA	NA	NA	NA	AC005944.1
0	NA	NA	NA	NA	NA	AC005951.1
1.22504	0.0720414	0.0458974	1.89592	0.0579709	NA	AC005954.1
0.406645	0.00251446	0.0268896	0.0935105	0.925498	NA	AC005954.2
1.11074	0.0171777	0.0421663	0.406491	0.684382	NA	AC005962.1
0	NA	NA	NA	NA	NA	AC005972.1
0	NA	NA	NA	NA	NA	AC005972.2
0.249333	-0.00911251	0.0226086	-0.352452	0.724499	NA	AC005972.3
1.68101	-0.0102487	0.0577438	-0.179855	0.857267	NA	AC005993.1
0.424801	-0.0111729	0.0250183	-0.56326	0.573258	NA	AC005996.1
0	NA	NA	NA	NA	NA	AC005999.1
0	NA	NA	NA	NA	NA	AC005999.2
0.146343	0.00691865	0.0221402	0.312493	0.754666	NA	AC006001.1
10.6273	-0.00941603	0.113054	-0.0830399	0.93382	NA	AC006001.2
192.323	0.138748	0.135459	1.02427	0.305709	0.734861	AC006001.3
0	NA	NA	NA	NA	NA	AC006001.4
0	NA	NA	NA	NA	NA	AC006003.1
0	NA	NA	NA	NA	NA	AC006004.1
0	NA	NA	NA	NA	NA	AC006006.1
0	NA	NA	NA	NA	NA	AC006007.1
0	NA	NA	NA	NA	NA	AC006011.1
1.77945	-0.00170267	0.0593648	-0.028679	0.977121	NA	AC006011.2
0.6272	-8.86453e-05	0.0335982	-0.00242235	0.998067	NA	AC006012.1
0	NA	NA	NA	NA	NA	AC006013.1
0.358743	0.00230166	0.0257354	0.0894353	0.928736	NA	AC006014.1
0	NA	NA	NA	NA	NA	AC006014.10
0	NA	NA	NA	NA	NA	AC006015.1
0.344827	0.00224861	0.0254393	0.088391	0.929566	NA	AC006017.1
0.146343	0.00691865	0.0221402	0.312493	0.754666	NA	AC006019.1
0	NA	NA	NA	NA	NA	AC006019.2
0	NA	NA	NA	NA	NA	AC006019.3
3.39754	-0.0106088	0.0734922	-0.142578	0.886623	NA	AC006020.1
0	NA	NA	NA	NA	NA	AC006022.1
0	NA	NA	NA	NA	NA	AC006023.1
0.194245	0.00691865	0.0221402	0.312493	0.754666	NA	AC006023.2
0.961366	-0.0181459	0.0430383	-0.419764	0.674658	NA	AC006026.1
0	NA	NA	NA	NA	NA	AC006026.2
0.693468	0.0097957	0.0330442	0.276436	0.782213	NA	AC006026.3
0	NA	NA	NA	NA	NA	AC006027.1
0.33962	-0.0113147	0.0251754	-0.481043	0.630486	NA	AC006028.1
0.671398	0.00763692	0.0342927	0.210236	0.833483	NA	AC006030.1
0	NA	NA	NA	NA	NA	AC006033.1
1.69882	-0.0314037	0.0559808	-0.575149	0.565191	NA	AC006033.2
0	NA	NA	NA	NA	NA	AC006035.1
0	NA	NA	NA	NA	NA	AC006037.1
0	NA	NA	NA	NA	NA	AC006041.1
7.93682	-0.0197268	0.103453	-0.19036	0.849027	NA	AC006042.1
0.790256	0.0255359	0.0342223	0.761123	0.446584	NA	AC006042.2
1.86843	-0.0481049	0.0604004	-0.819438	0.412537	NA	AC006042.3
0.812634	0.0198728	0.0412505	0.47069	0.637862	NA	AC006042.4
0	NA	NA	NA	NA	NA	AC006043.1
0	NA	NA	NA	NA	NA	AC006055.1
101.708	0.494954	0.150682	3.2963	0.000979669	0.0432806	AC006058.1
0.127219	-0.00351833	0.0221402	-0.158911	0.873739	NA	AC006058.2
1.52761	0.00184401	0.0515222	0.0346658	0.972346	NA	AC006058.3
39.2842	0.523896	0.144656	3.65088	0.000261348	0.0179495	AC006058.4
5.45922	0.156649	0.0920337	1.75808	0.0787345	NA	AC006059.1
0.870229	0.00175097	0.0351659	0.0527097	0.957963	NA	AC006059.2
0	NA	NA	NA	NA	NA	AC006059.3
0	NA	NA	NA	NA	NA	AC006063.1
0	NA	NA	NA	NA	NA	AC006063.2
0.829598	0.017178	0.0355373	0.467487	0.640151	NA	AC006064.1
3.21003	-0.00138329	0.0747828	-0.0183115	0.98539	NA	AC006064.2
2.43366	0.0698169	0.0661972	1.06459	0.28706	NA	AC006064.3
0	NA	NA	NA	NA	NA	AC006064.4
1.83409	-0.0503753	0.0576624	-0.887819	0.374638	NA	AC006064.5
0	NA	NA	NA	NA	NA	AC006064.6
0	NA	NA	NA	NA	NA	AC006065.1
0	NA	NA	NA	NA	NA	AC006065.2
0	NA	NA	NA	NA	NA	AC006065.3
0	NA	NA	NA	NA	NA	AC006065.4
0	NA	NA	NA	NA	NA	AC006065.5
0	NA	NA	NA	NA	NA	AC006065.6
0	NA	NA	NA	NA	NA	AC006076.1
0.127219	-0.00351833	0.0221402	-0.158911	0.873739	NA	AC006077.1
5.33649	0.0527756	0.0915155	0.5769	0.564007	NA	AC006077.2
0	NA	NA	NA	NA	NA	AC006080.1
3.01083	-0.123166	0.0682532	-1.93727	0.052712	NA	AC006111.1
10.7055	-0.0887977	0.114711	-0.779659	0.435592	NA	AC006111.2
0.146343	0.00691865	0.0221402	0.312493	0.754666	NA	AC006111.3
0.146343	0.00691865	0.0221402	0.312493	0.754666	NA	AC006115.1
0	NA	NA	NA	NA	NA	AC006115.2
0	NA	NA	NA	NA	NA	AC006115.3
2.78458	0.021831	0.070181	0.307608	0.75838	NA	AC006116.1
4.10631	0.0906185	0.0836917	1.09945	0.27157	NA	AC006116.10
0.844706	-0.0110398	0.0377158	-0.291448	0.770708	NA	AC006116.2
0	NA	NA	NA	NA	NA	AC006116.3
3.72077	-0.0204767	0.0802963	-0.258156	0.796287	NA	AC006116.4
0.358743	0.00230166	0.0257354	0.0894353	0.928736	NA	AC006116.5
1.82301	-0.0677477	0.0583761	-1.22108	0.222057	NA	AC006116.6
0	NA	NA	NA	NA	NA	AC006116.7
1.67656	-0.0216346	0.0485223	-0.464707	0.642141	NA	AC006116.8
0.884766	0.0391551	0.0410318	0.999314	0.317642	NA	AC006116.9
1.0899	0.0125394	0.0444235	0.281346	0.778445	NA	AC006122.1
20.9851	0.354925	0.131762	2.72474	0.00643522	0.135381	AC006128.1
0.146343	0.00691865	0.0221402	0.312493	0.754666	NA	AC006130.1
0	NA	NA	NA	NA	NA	AC006130.2
0	NA	NA	NA	NA	NA	AC006133.1
9.96245	-0.10504	0.11519	-0.918902	0.358147	NA	AC006141.1
0	NA	NA	NA	NA	NA	AC006144.1
0.69291	-0.0188574	0.0356889	-0.548756	0.583173	NA	AC006145.1
0	NA	NA	NA	NA	NA	AC006146.1
0.416959	0.0181738	0.0270555	0.708111	0.478876	NA	AC006148.1
0.127219	-0.00351833	0.0221402	-0.158911	0.873739	NA	AC006148.2
0	NA	NA	NA	NA	NA	AC006150.1
0	NA	NA	NA	NA	NA	AC006150.2
0	NA	NA	NA	NA	NA	AC006153.1
0	NA	NA	NA	NA	NA	AC006157.1
0	NA	NA	NA	NA	NA	AC006158.1
0	NA	NA	NA	NA	NA	AC006159.1
0	NA	NA	NA	NA	NA	AC006159.2
1.25992	0.0068628	0.0471895	0.144506	0.885101	NA	AC006160.1
0	NA	NA	NA	NA	NA	AC006160.2
0.639673	0.0320309	0.0316722	1.05337	0.292172	NA	AC006195.1
0	NA	NA	NA	NA	NA	AC006197.1
0.522895	-0.0129806	0.031821	-0.349079	0.72703	NA	AC006199.1
0	NA	NA	NA	NA	NA	AC006205.1
0	NA	NA	NA	NA	NA	AC006205.2
0.443577	-0.00459758	0.0299124	-0.14893	0.881609	NA	AC006206.1
2.20412	0.00912442	0.0617352	0.144683	0.884961	NA	AC006206.2
0	NA	NA	NA	NA	NA	AC006207.1
0	NA	NA	NA	NA	NA	AC006210.1
2.11925	0.0424812	0.0585689	0.760843	0.446751	NA	AC006210.2
3.16177	0.0733401	0.0745199	0.995024	0.319725	NA	AC006213.1
10.7627	0.062255	0.115628	0.538868	0.589978	NA	AC006213.2
3.95532	0.0907518	0.0825522	1.12564	0.260318	NA	AC006213.3
5.95102	-0.0341425	0.0910203	-0.377239	0.705996	NA	AC006213.4
0.340588	0.0159685	0.0253735	0.588901	0.555928	NA	AC006213.5
6.78513	-0.0618746	0.102285	-0.605591	0.544786	NA	AC006213.6
0	NA	NA	NA	NA	NA	AC006236.1
0.2124	-0.00351833	0.0221402	-0.158911	0.873739	NA	AC006237.1
0	NA	NA	NA	NA	NA	AC006238.1
0.122113	-0.00351833	0.0221402	-0.158911	0.873739	NA	AC006238.2
0.2124	-0.00351833	0.0221402	-0.158911	0.873739	NA	AC006249.1
3.58246	0.0592964	0.0720991	0.823286	0.410345	NA	AC006252.1
10.2006	0.081481	0.114261	0.721223	0.470773	NA	AC006254.1
1.63897	-0.00458053	0.0535271	-0.0878034	0.930033	NA	AC006254.2
0.562334	-0.00691459	0.0320641	-0.253987	0.799505	NA	AC006254.3
0	NA	NA	NA	NA	NA	AC006262.1
0.122113	-0.00351833	0.0221402	-0.158911	0.873739	NA	AC006262.2
0	NA	NA	NA	NA	NA	AC006262.3
0	NA	NA	NA	NA	NA	AC006270.1
0	NA	NA	NA	NA	NA	AC006270.2
0	NA	NA	NA	NA	NA	AC006270.3
0.127219	-0.00351833	0.0221402	-0.158911	0.873739	NA	AC006272.1
0	NA	NA	NA	NA	NA	AC006272.2
1.39704	0.0154066	0.0510893	0.299568	0.764506	NA	AC006273.1
14.3063	0.00380551	0.126731	0.0301421	0.975954	0.996598	AC006277.1
0	NA	NA	NA	NA	NA	AC006288.1
0	NA	NA	NA	NA	NA	AC006296.1
0	NA	NA	NA	NA	NA	AC006296.2
0	NA	NA	NA	NA	NA	AC006299.1
12.3838	0.0401318	0.119225	0.334538	0.737974	NA	AC006305.1
0	NA	NA	NA	NA	NA	AC006305.2
0	NA	NA	NA	NA	NA	AC006305.3
0	NA	NA	NA	NA	NA	AC006322.1
0	NA	NA	NA	NA	NA	AC006326.1
0.146343	0.00691865	0.0221402	0.312493	0.754666	NA	AC006328.1
0	NA	NA	NA	NA	NA	AC006328.2
411.242	-0.171808	0.134453	-1.27769	0.201358	0.634997	AC006329.1
1.31305	-0.00813396	0.0470228	-0.17513	0.860977	NA	AC006329.2
7.92925	-0.0947443	0.106074	-0.907466	0.36416	NA	AC006330.1
0	NA	NA	NA	NA	NA	AC006333.1
52.8993	0.148072	0.150636	0.984538	0.324851	0.74665	AC006333.2
0	NA	NA	NA	NA	NA	AC006335.1
0	NA	NA	NA	NA	NA	AC006335.2
0	NA	NA	NA	NA	NA	AC006335.3
0	NA	NA	NA	NA	NA	AC006338.1
0	NA	NA	NA	NA	NA	AC006338.2
0	NA	NA	NA	NA	NA	AC006349.1
0	NA	NA	NA	NA	NA	AC006355.1
0	NA	NA	NA	NA	NA	AC006355.2
0	NA	NA	NA	NA	NA	AC006357.1
0	NA	NA	NA	NA	NA	AC006362.1
0	NA	NA	NA	NA	NA	AC006363.1
0	NA	NA	NA	NA	NA	AC006366.1
0	NA	NA	NA	NA	NA	AC006369.1
0	NA	NA	NA	NA	NA	AC006369.2
0	NA	NA	NA	NA	NA	AC006371.1
0.146343	0.00691865	0.0221402	0.312493	0.754666	NA	AC006372.1
0.779942	0.00562619	0.036013	0.16278	0.870691	NA	AC006372.2
0.244226	-0.00873679	0.0221402	-0.339719	0.734068	NA	AC006372.3
0	NA	NA	NA	NA	NA	AC006377.1
2.1433	-0.00377251	0.0625531	-0.0605081	0.951751	NA	AC006378.1
0	NA	NA	NA	NA	NA	AC006380.1
0	NA	NA	NA	NA	NA	AC006386.1
0	NA	NA	NA	NA	NA	AC006386.2
1.00591	-0.0123268	0.0447426	-0.282739	0.777377	NA	AC006387.1
0	NA	NA	NA	NA	NA	AC006390.1
0	NA	NA	NA	NA	NA	AC006427.1
0	NA	NA	NA	NA	NA	AC006432.1
0	NA	NA	NA	NA	NA	AC006435.1
14.1346	0.134198	0.120446	1.12409	0.260975	0.694965	AC006435.2
0	NA	NA	NA	NA	NA	AC006435.3
0	NA	NA	NA	NA	NA	AC006435.4
0	NA	NA	NA	NA	NA	AC006435.5
1.90222	-0.0264389	0.0575041	-0.469042	0.639039	NA	AC006441.1
0	NA	NA	NA	NA	NA	AC006441.2
0	NA	NA	NA	NA	NA	AC006441.3
0	NA	NA	NA	NA	NA	AC006441.4
0	NA	NA	NA	NA	NA	AC006441.5
0	NA	NA	NA	NA	NA	AC006445.1
0.567541	0.0128412	0.0300885	0.47858	0.632237	NA	AC006445.2
0	NA	NA	NA	NA	NA	AC006449.1
0.146343	0.00691865	0.0221402	0.312493	0.754666	NA	AC006449.2
0.122113	-0.00351833	0.0221402	-0.158911	0.873739	NA	AC006449.3
5.15692	-0.0133095	0.0907548	-0.145947	0.883963	NA	AC006449.5
0.56569	-0.0111809	0.0327336	-0.353558	0.72367	NA	AC006449.6
0	NA	NA	NA	NA	NA	AC006449.7
0	NA	NA	NA	NA	NA	AC006450.1
0	NA	NA	NA	NA	NA	AC006450.2
0	NA	NA	NA	NA	NA	AC006450.3
1.06839	0.0428047	0.0445	1.1555	0.247885	NA	AC006452.1
0	NA	NA	NA	NA	NA	AC006453.1
1.14867	0.0665667	0.0442077	1.80287	0.0714089	NA	AC006453.2
0	NA	NA	NA	NA	NA	AC006453.3
0	NA	NA	NA	NA	NA	AC006453.4
0	NA	NA	NA	NA	NA	AC006455.1
0	NA	NA	NA	NA	NA	AC006455.2
0	NA	NA	NA	NA	NA	AC006455.3
0	NA	NA	NA	NA	NA	AC006455.4
0	NA	NA	NA	NA	NA	AC006455.5
0	NA	NA	NA	NA	NA	AC006455.6
0	NA	NA	NA	NA	NA	AC006455.7
0	NA	NA	NA	NA	NA	AC006455.8
0	NA	NA	NA	NA	NA	AC006457.1
0	NA	NA	NA	NA	NA	AC006458.1
0.273562	0.0018957	0.0233712	0.0811127	0.935352	NA	AC006460.1
0	NA	NA	NA	NA	NA	AC006461.1
0	NA	NA	NA	NA	NA	AC006463.1
0	NA	NA	NA	NA	NA	AC006466.1
0	NA	NA	NA	NA	NA	AC006480.1
3.85987	0.0673608	0.0736712	0.954571	0.339795	NA	AC006480.2
0	NA	NA	NA	NA	NA	AC006482.1
0.883798	-0.00346319	0.0402598	-0.0881545	0.929754	NA	AC006483.1
0.773543	0.00823986	0.0364757	0.226454	0.820848	NA	AC006483.2
0	NA	NA	NA	NA	NA	AC006484.1
0	NA	NA	NA	NA	NA	AC006486.1
0	NA	NA	NA	NA	NA	AC006486.2
0.546914	-0.0242605	0.0298475	-0.80646	0.419978	NA	AC006487.1
0	NA	NA	NA	NA	NA	AC006487.2
0	NA	NA	NA	NA	NA	AC006499.1
0	NA	NA	NA	NA	NA	AC006499.2
0	NA	NA	NA	NA	NA	AC006499.3
0	NA	NA	NA	NA	NA	AC006499.4
0	NA	NA	NA	NA	NA	AC006499.5
0	NA	NA	NA	NA	NA	AC006499.6
0	NA	NA	NA	NA	NA	AC006499.7
0	NA	NA	NA	NA	NA	AC006499.8
10.4794	-0.0471506	0.113329	-0.420519	0.674106	NA	AC006504.1
0	NA	NA	NA	NA	NA	AC006504.2
1.90677	0.015181	0.0603612	0.250167	0.802458	NA	AC006504.3
0	NA	NA	NA	NA	NA	AC006504.4
51.5191	-0.0510542	0.150687	-0.33861	0.734903	0.931375	AC006504.5
0	NA	NA	NA	NA	NA	AC006504.6
0	NA	NA	NA	NA	NA	AC006504.7
13.3594	-0.0173536	0.12461	-0.139015	0.889438	0.975762	AC006504.8
1.28283	-0.014038	0.0482244	-0.288343	0.773084	NA	AC006509.1
0.268456	0.00186894	0.0232067	0.0805348	0.935812	NA	AC006509.2
0.122113	-0.00351833	0.0221402	-0.158911	0.873739	NA	AC006511.1
1.49558	-0.0277548	0.0527609	-0.534479	0.59301	NA	AC006511.2
15.7194	-0.0282892	0.128116	-0.220839	0.825218	0.958917	AC006511.3
0.963217	0.0109559	0.0422624	0.257906	0.79648	NA	AC006511.4
0.82655	0.0114473	0.0395972	0.292994	0.769527	NA	AC006511.5
0	NA	NA	NA	NA	NA	AC006512.1
0	NA	NA	NA	NA	NA	AC006512.2
0	NA	NA	NA	NA	NA	AC006517.1
0.544178	0.0140196	0.0317602	0.475919	0.634132	NA	AC006518.1
0.964084	0.027347	0.0426072	0.64058	0.521796	NA	AC006518.2
0	NA	NA	NA	NA	NA	AC006529.1
0	NA	NA	NA	NA	NA	AC006530.1
0	NA	NA	NA	NA	NA	AC006534.1
0	NA	NA	NA	NA	NA	AC006534.2
6.6649	-0.116027	0.0972366	-1.20132	0.229626	NA	AC006538.1
0	NA	NA	NA	NA	NA	AC006538.2
0.254439	-0.00873679	0.0221402	-0.349729	0.726542	NA	AC006538.3
2.41936	-0.0242235	0.067413	-0.35673	0.721294	NA	AC006539.1
4.95372	0.0154443	0.0901008	0.172026	0.863417	NA	AC006539.2
9.58202	-0.0916421	0.111418	-0.834209	0.404163	NA	AC006547.1
0	NA	NA	NA	NA	NA	AC006547.2
0	NA	NA	NA	NA	NA	AC006547.3
0	NA	NA	NA	NA	NA	AC006548.1
0	NA	NA	NA	NA	NA	AC006548.2
0.273562	0.0018957	0.0233712	0.0811127	0.935352	NA	AC006548.3
17.0439	-0.151886	0.130819	-1.16704	0.243195	0.676044	AC006557.1
0	NA	NA	NA	NA	NA	AC006557.2
0	NA	NA	NA	NA	NA	AC006557.3
0	NA	NA	NA	NA	NA	AC006557.4
1.56639	-0.0457873	0.0527159	-0.915317	0.360025	NA	AC006557.5
0	NA	NA	NA	NA	NA	AC006557.6
0	NA	NA	NA	NA	NA	AC006566.1
0	NA	NA	NA	NA	NA	AC006581.1
14.7112	0.0278531	0.128195	0.216818	0.82835	0.959322	AC006581.2
0	NA	NA	NA	NA	NA	AC006600.1
0	NA	NA	NA	NA	NA	AC006600.2
0	NA	NA	NA	NA	NA	AC006840.1
0	NA	NA	NA	NA	NA	AC006924.1
0	NA	NA	NA	NA	NA	AC006926.1
0.254439	-0.00873679	0.0221402	-0.349729	0.726542	NA	AC006927.1
0	NA	NA	NA	NA	NA	AC006927.2
0.127219	-0.00351833	0.0221402	-0.158911	0.873739	NA	AC006927.3
0	NA	NA	NA	NA	NA	AC006927.4
0	NA	NA	NA	NA	NA	AC006927.5
1.72467	0.00864032	0.054764	0.159741	0.873085	NA	AC006942.1
0.897815	0.0162573	0.042438	0.396927	0.691421	NA	AC006946.1
0	NA	NA	NA	NA	NA	AC006946.2
0	NA	NA	NA	NA	NA	AC006946.3
0	NA	NA	NA	NA	NA	AC006947.1
0.146343	0.00691865	0.0221402	0.312493	0.754666	NA	AC006953.1
0.344827	0.00224861	0.0254393	0.088391	0.929566	NA	AC006960.1
0	NA	NA	NA	NA	NA	AC006960.2
0.539072	0.0141699	0.0316487	0.474621	0.635057	NA	AC006960.3
0.146343	0.00691865	0.0221402	0.312493	0.754666	NA	AC006963.1
0.222714	0.00691865	0.0221402	0.312493	0.754666	NA	AC006965.1
0	NA	NA	NA	NA	NA	AC006967.1
0	NA	NA	NA	NA	NA	AC006967.2
0	NA	NA	NA	NA	NA	AC006967.3
1.0535	0.00796347	0.045222	0.179202	0.857779	NA	AC006970.1
1.04371	0.000478229	0.0410585	0.0114545	0.990861	NA	AC006970.2
0	NA	NA	NA	NA	NA	AC006970.3
6.96035	-0.0495715	0.0987403	-0.510992	0.609357	NA	AC006971.1
0	NA	NA	NA	NA	NA	AC006972.1
0.775702	0.0242614	0.0384401	0.764796	0.444393	NA	AC006974.1
0	NA	NA	NA	NA	NA	AC006974.2
65.4589	0.207517	0.150284	1.38077	0.167349	0.596595	AC006978.1
0	NA	NA	NA	NA	NA	AC006978.2
0	NA	NA	NA	NA	NA	AC006986.1
0	NA	NA	NA	NA	NA	AC006987.1
0	NA	NA	NA	NA	NA	AC006987.2
0	NA	NA	NA	NA	NA	AC006987.3
0	NA	NA	NA	NA	NA	AC006988.1
0	NA	NA	NA	NA	NA	AC006989.1
0.194245	0.00691865	0.0221402	0.312493	0.754666	NA	AC006994.1
0.268456	0.00186894	0.0232067	0.0805348	0.935812	NA	AC006994.2
0	NA	NA	NA	NA	NA	AC006994.3
2.28398	-0.0283507	0.0659415	-0.434926	0.663616	NA	AC007000.1
0.2124	-0.00351833	0.0221402	-0.158911	0.873739	NA	AC007000.2
0.292686	0.0121372	0.0221402	0.471018	0.637628	NA	AC007000.3
1.38246	-0.0363969	0.0515344	-0.737124	0.461047	NA	AC007001.1
0	NA	NA	NA	NA	NA	AC007003.1
0	NA	NA	NA	NA	NA	AC007009.1
0.146343	0.00691865	0.0221402	0.312493	0.754666	NA	AC007009.2
0	NA	NA	NA	NA	NA	AC007012.1
0	NA	NA	NA	NA	NA	AC007012.2
0.146343	0.00691865	0.0221402	0.312493	0.754666	NA	AC007014.1
0.33962	-0.0113147	0.0251754	-0.481043	0.630486	NA	AC007014.2
0.194245	0.00691865	0.0221402	0.312493	0.754666	NA	AC007016.1
0	NA	NA	NA	NA	NA	AC007025.1
0.194245	0.00691865	0.0221402	0.312493	0.754666	NA	AC007029.1
0	NA	NA	NA	NA	NA	AC007032.1
0.122113	-0.00351833	0.0221402	-0.158911	0.873739	NA	AC007036.1
0.249333	-0.00911251	0.0226086	-0.352452	0.724499	NA	AC007036.2
0	NA	NA	NA	NA	NA	AC007036.3
5.83943	-0.0440915	0.0929057	-0.478609	0.632217	NA	AC007038.1
15.2219	-0.0618767	0.126003	-0.491805	0.622857	0.898539	AC007038.2
0.146343	0.00691865	0.0221402	0.312493	0.754666	NA	AC007040.1
0.2124	-0.00351833	0.0221402	-0.158911	0.873739	NA	AC007040.2
0	NA	NA	NA	NA	NA	AC007040.3
2.19337	-0.0579734	0.0604673	-1.0025	0.316101	NA	AC007041.1
0	NA	NA	NA	NA	NA	AC007050.1
0	NA	NA	NA	NA	NA	AC007056.1
0	NA	NA	NA	NA	NA	AC007064.1
0	NA	NA	NA	NA	NA	AC007064.2
0	NA	NA	NA	NA	NA	AC007064.3
0	NA	NA	NA	NA	NA	AC007064.4
0.754419	-0.00832284	0.0384088	-0.210387	0.833365	NA	AC007066.1
59.5228	0.209296	0.150347	1.39192	0.163946	0.591185	AC007066.2
0	NA	NA	NA	NA	NA	AC007068.1
0	NA	NA	NA	NA	NA	AC007068.2
0.127219	-0.00351833	0.0221402	-0.158911	0.873739	NA	AC007091.1
0	NA	NA	NA	NA	NA	AC007092.1
0	NA	NA	NA	NA	NA	AC007096.1
18.1037	-0.00780245	0.133654	-0.0586293	0.953247	0.991957	AC007098.1
0	NA	NA	NA	NA	NA	AC007098.2
0	NA	NA	NA	NA	NA	AC007099.1
0	NA	NA	NA	NA	NA	AC007099.2
0	NA	NA	NA	NA	NA	AC007100.1
0	NA	NA	NA	NA	NA	AC007106.1
4.27428	-0.0512584	0.0841259	-0.613354	0.539642	NA	AC007114.1
2.50409	-0.0492131	0.0670496	-0.736223	0.461595	NA	AC007114.2
0	NA	NA	NA	NA	NA	AC007115.1
0	NA	NA	NA	NA	NA	AC007126.1
9.04418	0.181077	0.102592	1.79305	0.0729642	NA	AC007128.1
2.14608	0.0486865	0.0611532	0.801292	0.422962	NA	AC007128.2
0	NA	NA	NA	NA	NA	AC007131.3
0	NA	NA	NA	NA	NA	AC007132.1
0	NA	NA	NA	NA	NA	AC007136.1
0	NA	NA	NA	NA	NA	AC007151.1
0	NA	NA	NA	NA	NA	AC007159.1
0.222714	0.00691865	0.0221402	0.312493	0.754666	NA	AC007160.1
0	NA	NA	NA	NA	NA	AC007161.1
0	NA	NA	NA	NA	NA	AC007161.2
0	NA	NA	NA	NA	NA	AC007161.3
0.222714	0.00691865	0.0221402	0.312493	0.754666	NA	AC007163.1
0	NA	NA	NA	NA	NA	AC007179.1
0.244226	-0.00873679	0.0221402	-0.339719	0.734068	NA	AC007179.2
0	NA	NA	NA	NA	NA	AC007179.3
0	NA	NA	NA	NA	NA	AC007182.1
36.4394	-0.247242	0.148848	-1.6615	0.0966132	0.484028	AC007182.2
100.924	0.185082	0.148769	1.24284	0.213928	0.646381	AC007191.1
0.2124	-0.00351833	0.0221402	-0.158911	0.873739	NA	AC007192.1
0	NA	NA	NA	NA	NA	AC007192.2
0	NA	NA	NA	NA	NA	AC007193.1
1.63953	0.0239621	0.0505825	0.497424	0.61889	NA	AC007193.2
0	NA	NA	NA	NA	NA	AC007193.3
7.85797	-0.0156099	0.105777	-0.148786	0.881722	NA	AC007204.1
0	NA	NA	NA	NA	NA	AC007207.1
2.03019	-0.0118122	0.0609603	-0.19371	0.846403	NA	AC007207.2
0	NA	NA	NA	NA	NA	AC007215.1
0	NA	NA	NA	NA	NA	AC007216.1
0	NA	NA	NA	NA	NA	AC007216.2
6.40628	-0.0288225	0.0999347	-0.289031	0.772557	NA	AC007216.3
1.47341	0.0188704	0.052509	0.360799	0.71825	NA	AC007216.4
0	NA	NA	NA	NA	NA	AC007216.5
28.7507	-0.108669	0.142628	-0.760881	0.446728	0.815775	AC007218.1
0.759314	-0.0362783	0.0338983	-1.08152	0.279464	NA	AC007218.2
0	NA	NA	NA	NA	NA	AC007220.1
0	NA	NA	NA	NA	NA	AC007221.1
0	NA	NA	NA	NA	NA	AC007221.2
0	NA	NA	NA	NA	NA	AC007223.1
0	NA	NA	NA	NA	NA	AC007224.1
0.222714	0.00691865	0.0221402	0.312493	0.754666	NA	AC007224.2
1.32532	0.00383982	0.0503361	0.074757	0.940408	NA	AC007225.1
0	NA	NA	NA	NA	NA	AC007225.2
7.14212	-0.0758821	0.102742	-0.749563	0.453518	NA	AC007228.1
31.831	0.0765893	0.146643	0.521285	0.602168	0.888364	AC007229.1
0	NA	NA	NA	NA	NA	AC007237.1
17.3786	-0.0602193	0.134913	-0.44645	0.655272	0.909603	AC007238.1
5.16147	0.0845573	0.0918508	0.922785	0.356119	NA	AC007240.1
2.20836	-0.0059712	0.0621242	-0.094713	0.924543	NA	AC007240.2
0	NA	NA	NA	NA	NA	AC007241.1
0	NA	NA	NA	NA	NA	AC007242.1
1.12802	-0.0206804	0.0473731	-0.449902	0.652781	NA	AC007249.1
12.3502	-0.0530812	0.122839	-0.430606	0.666755	NA	AC007249.2
1.75522	-0.0209336	0.0593575	-0.35482	0.722725	NA	AC007250.1
0	NA	NA	NA	NA	NA	AC007253.1
6.31882	0.0237783	0.0965771	0.2487	0.803593	NA	AC007255.1
0	NA	NA	NA	NA	NA	AC007255.2
2.6853	-0.04379	0.0694078	-0.644812	0.519049	NA	AC007256.1
0	NA	NA	NA	NA	NA	AC007262.1
0.850222	-0.004262	0.0398235	-0.108663	0.91347	NA	AC007262.2
1.49558	-0.0277548	0.0527609	-0.534479	0.59301	NA	AC007272.1
0	NA	NA	NA	NA	NA	AC007274.1
0	NA	NA	NA	NA	NA	AC007274.2
0	NA	NA	NA	NA	NA	AC007274.3
0	NA	NA	NA	NA	NA	AC007275.1
0.194245	0.00691865	0.0221402	0.312493	0.754666	NA	AC007277.1
0	NA	NA	NA	NA	NA	AC007278.1
0	NA	NA	NA	NA	NA	AC007278.2
0.82655	0.0114473	0.0395972	0.292994	0.769527	NA	AC007279.1
0	NA	NA	NA	NA	NA	AC007283.1
0.127219	-0.00351833	0.0221402	-0.158911	0.873739	NA	AC007283.2
2.33574	-0.00650055	0.0558845	-0.11659	0.907185	NA	AC007285.1
2.26605	0.00245538	0.0620773	0.0396436	0.968377	NA	AC007285.2
7.36113	-0.0565766	0.102312	-0.56132	0.57458	NA	AC007292.1
3.14661	-0.0028853	0.0707943	-0.0418551	0.966614	NA	AC007292.2
0	NA	NA	NA	NA	NA	AC007292.3
0	NA	NA	NA	NA	NA	AC007298.1
0.485963	-0.00719844	0.0306072	-0.24469	0.806697	NA	AC007298.2
0	NA	NA	NA	NA	NA	AC007308.1
0.911076	0.0251845	0.0415141	0.597964	0.549864	NA	AC007308.6
1.35171	0.0360353	0.0510111	0.713289	0.475667	NA	AC007312.1
0.406645	0.00251446	0.0268896	0.0935105	0.925498	NA	AC007314.1
209.227	-0.00245186	0.13302	-0.018422	0.985302	0.998035	AC007318.1
19.4134	0.00128554	0.134364	0.00956358	0.992369	0.999217	AC007318.2
14.2137	-0.0673433	0.126797	-0.532624	0.594294	0.887079	AC007319.1
0	NA	NA	NA	NA	NA	AC007322.1
0	NA	NA	NA	NA	NA	AC007322.2
0	NA	NA	NA	NA	NA	AC007322.3
0	NA	NA	NA	NA	NA	AC007322.4
0.316358	0.00211253	0.024663	0.085656	0.93174	NA	AC007326.1
0.637513	0.0228263	0.0340099	0.648607	0.516592	NA	AC007326.2
1.04045	0.0303181	0.0435707	0.705092	0.480753	NA	AC007326.3
0	NA	NA	NA	NA	NA	AC007326.4
5.88491	0.23873	0.090089	2.81845	0.00482565	NA	AC007326.5
0	NA	NA	NA	NA	NA	AC007327.1
0	NA	NA	NA	NA	NA	AC007327.2
0.146343	0.00691865	0.0221402	0.312493	0.754666	NA	AC007333.1
0	NA	NA	NA	NA	NA	AC007333.2
2.80373	-0.00232193	0.0705909	-0.032647	0.973956	NA	AC007336.1
0	NA	NA	NA	NA	NA	AC007336.2
0.194245	0.00691865	0.0221402	0.312493	0.754666	NA	AC007336.3
0	NA	NA	NA	NA	NA	AC007339.1
0	NA	NA	NA	NA	NA	AC007342.1
0	NA	NA	NA	NA	NA	AC007342.2
1.19081	0.0175847	0.0475017	0.375149	0.707549	NA	AC007342.3
0	NA	NA	NA	NA	NA	AC007342.4
0.461733	-0.0238495	0.0303015	-0.746818	0.455173	NA	AC007342.5
1.9975	-0.0220837	0.057995	-0.389881	0.696625	NA	AC007342.6
12.3999	-0.0267766	0.122176	-0.217853	0.827544	NA	AC007342.7
0	NA	NA	NA	NA	NA	AC007342.8
0.254439	-0.00873679	0.0221402	-0.349729	0.726542	NA	AC007342.9
0.841104	0.0192745	0.0398043	0.476851	0.633468	NA	AC007344.1
0	NA	NA	NA	NA	NA	AC007346.1
0	NA	NA	NA	NA	NA	AC007346.2
0.254439	-0.00873679	0.0221402	-0.349729	0.726542	NA	AC007347.1
0	NA	NA	NA	NA	NA	AC007349.1
0	NA	NA	NA	NA	NA	AC007349.2
0	NA	NA	NA	NA	NA	AC007349.3
0.127219	-0.00351833	0.0221402	-0.158911	0.873739	NA	AC007349.4
0	NA	NA	NA	NA	NA	AC007353.1
0	NA	NA	NA	NA	NA	AC007358.1
0	NA	NA	NA	NA	NA	AC007359.1
1.09915	-0.0248747	0.0425785	-0.592485	0.553526	NA	AC007362.1
0	NA	NA	NA	NA	NA	AC007363.1
0.194245	0.00691865	0.0221402	0.312493	0.754666	NA	AC007364.1
1.33446	-0.0522359	0.0460395	-1.23738	0.215947	NA	AC007365.1
0.254439	-0.00873679	0.0221402	-0.349729	0.726542	NA	AC007365.2
4.28451	0.0500117	0.0834859	0.60057	0.548127	NA	AC007368.1
0	NA	NA	NA	NA	NA	AC007368.2
0.2124	-0.00351833	0.0221402	-0.158911	0.873739	NA	AC007370.1
0.334514	-0.0112038	0.0250526	-0.472669	0.63645	NA	AC007370.2
0	NA	NA	NA	NA	NA	AC007375.1
12.1916	0.0349022	0.119357	0.293922	0.768817	NA	AC007375.2
0	NA	NA	NA	NA	NA	AC007376.1
0.194245	0.00691865	0.0221402	0.312493	0.754666	NA	AC007376.2
0	NA	NA	NA	NA	NA	AC007377.1
0	NA	NA	NA	NA	NA	AC007378.1
25.8429	-0.144157	0.141995	-1.01731	0.309004	0.736226	AC007382.1
0	NA	NA	NA	NA	NA	AC007383.1
36.4448	0.0184159	0.146648	0.125635	0.900021	0.977467	AC007383.2
0	NA	NA	NA	NA	NA	AC007383.3
0	NA	NA	NA	NA	NA	AC007384.1
2.22641	0.0937365	0.061714	1.6613	0.0966537	NA	AC007386.1
0.2124	-0.00351833	0.0221402	-0.158911	0.873739	NA	AC007386.4
0.358743	0.00230166	0.0257354	0.0894353	0.928736	NA	AC007387.1
17.0979	-0.0390825	0.129353	-0.30323	0.761715	0.939807	AC007388.1
1.76968	-0.0365393	0.0571328	-0.660153	0.509156	NA	AC007389.1
0	NA	NA	NA	NA	NA	AC007389.2
0	NA	NA	NA	NA	NA	AC007389.3
0	NA	NA	NA	NA	NA	AC007389.4
3.81139	0.014151	0.0773248	0.180789	0.856533	NA	AC007389.5
0.651429	0.0140589	0.0321342	0.544169	0.586325	NA	AC007390.1
30.4257	0.0994034	0.146885	0.676375	0.498803	0.844685	AC007390.2
0.146343	0.00691865	0.0221402	0.312493	0.754666	NA	AC007391.1
0	NA	NA	NA	NA	NA	AC007394.1
0	NA	NA	NA	NA	NA	AC007395.1
0.316358	0.00211253	0.024663	0.085656	0.93174	NA	AC007402.1
0	NA	NA	NA	NA	NA	AC007403.1
2.48702	0.0697205	0.0654305	1.11883	0.263213	NA	AC007405.1
0	NA	NA	NA	NA	NA	AC007405.2
25.9255	0.0577118	0.140629	0.409579	0.682114	0.916318	AC007405.3
0	NA	NA	NA	NA	NA	AC007406.1
0	NA	NA	NA	NA	NA	AC007406.2
1.73565	0.0923802	0.056042	1.85701	0.0633098	NA	AC007406.3
0.292686	0.0121372	0.0221402	0.471018	0.637628	NA	AC007406.4
51.0259	-0.162419	0.150056	-1.08276	0.278913	0.71021	AC007406.5
0	NA	NA	NA	NA	NA	AC007421.1
0	NA	NA	NA	NA	NA	AC007422.1
0	NA	NA	NA	NA	NA	AC007422.2
0	NA	NA	NA	NA	NA	AC007423.1
1.36976	-0.0135445	0.0502427	-0.275007	0.783311	NA	AC007424.1
0	NA	NA	NA	NA	NA	AC007431.1
0	NA	NA	NA	NA	NA	AC007431.2
0.122113	-0.00351833	0.0221402	-0.158911	0.873739	NA	AC007431.3
0	NA	NA	NA	NA	NA	AC007435.1
0	NA	NA	NA	NA	NA	AC007436.1
0	NA	NA	NA	NA	NA	AC007448.1
0	NA	NA	NA	NA	NA	AC007448.2
4.32057	0.103798	0.0830627	1.29328	0.195913	NA	AC007448.3
4.91008	0.101047	0.0882749	1.17507	0.239967	NA	AC007448.4
0	NA	NA	NA	NA	NA	AC007450.1
0	NA	NA	NA	NA	NA	AC007450.2
0	NA	NA	NA	NA	NA	AC007450.3
0.122113	-0.00351833	0.0221402	-0.158911	0.873739	NA	AC007450.4
0.127219	-0.00351833	0.0221402	-0.158911	0.873739	NA	AC007458.1
0	NA	NA	NA	NA	NA	AC007461.1
6.62206	-0.132846	0.0942273	-1.45898	0.14457	NA	AC007463.1
0.358743	0.00230166	0.0257354	0.0894353	0.928736	NA	AC007485.1
90.7068	-0.0529113	0.150097	-0.353563	0.723666	0.928925	AC007485.2
0	NA	NA	NA	NA	NA	AC007486.1
7.29374	0.0877414	0.104674	0.840783	0.40047	NA	AC007490.1
0	NA	NA	NA	NA	NA	AC007491.1
0.533864	-0.00670919	0.0315707	-0.250727	0.802025	NA	AC007493.1
0	NA	NA	NA	NA	NA	AC007493.2
0.340588	0.0159685	0.0253735	0.588901	0.555928	NA	AC007494.1
0.613182	-0.0167392	0.0333715	-0.453215	0.650394	NA	AC007494.2
0.400782	-0.00434707	0.0268995	-0.137534	0.890609	NA	AC007494.3
3.27415	0.0482565	0.0760206	0.645178	0.518812	NA	AC007495.1
0	NA	NA	NA	NA	NA	AC007495.2
0.122113	-0.00351833	0.0221402	-0.158911	0.873739	NA	AC007496.1
0.146343	0.00691865	0.0221402	0.312493	0.754666	NA	AC007496.2
0.244226	-0.00873679	0.0221402	-0.339719	0.734068	NA	AC007496.3
3.22048	-0.0121	0.0760268	-0.161133	0.871989	NA	AC007497.1
0	NA	NA	NA	NA	NA	AC007513.1
0	NA	NA	NA	NA	NA	AC007527.1
0	NA	NA	NA	NA	NA	AC007527.2
0	NA	NA	NA	NA	NA	AC007528.1
0	NA	NA	NA	NA	NA	AC007529.1
0	NA	NA	NA	NA	NA	AC007529.2
0.194245	0.00691865	0.0221402	0.312493	0.754666	NA	AC007533.1
0	NA	NA	NA	NA	NA	AC007535.1
0.146343	0.00691865	0.0221402	0.312493	0.754666	NA	AC007536.1
126.305	0.148995	0.143022	1.0421	0.297367	0.726182	AC007537.1
0.613284	0.00581443	0.0333389	0.167162	0.867242	NA	AC007537.2
0.435114	0.00263405	0.0275163	0.0957268	0.923738	NA	AC007540.1
2.59707	0.0304429	0.0652089	0.468398	0.6395	NA	AC007541.1
0.376552	-0.0175793	0.02647	-0.574078	0.565915	NA	AC007546.1
0	NA	NA	NA	NA	NA	AC007546.2
0.2124	-0.00351833	0.0221402	-0.158911	0.873739	NA	AC007547.1
0	NA	NA	NA	NA	NA	AC007547.2
0	NA	NA	NA	NA	NA	AC007551.1
0.273562	0.0018957	0.0233712	0.0811127	0.935352	NA	AC007552.1
2.10602	0.00161505	0.0630501	0.0256108	0.979568	NA	AC007552.2
0	NA	NA	NA	NA	NA	AC007556.1
0	NA	NA	NA	NA	NA	AC007557.1
0	NA	NA	NA	NA	NA	AC007557.2
0	NA	NA	NA	NA	NA	AC007557.3
0	NA	NA	NA	NA	NA	AC007557.4
0.122113	-0.00351833	0.0221402	-0.158911	0.873739	NA	AC007559.1
7.03992	-0.0755099	0.10237	-0.740525	0.458981	NA	AC007560.1
0	NA	NA	NA	NA	NA	AC007560.2
0.462701	0.0122832	0.0303565	0.377206	0.706021	NA	AC007562.1
0.146343	0.00691865	0.0221402	0.312493	0.754666	NA	AC007563.1
0	NA	NA	NA	NA	NA	AC007563.2
0.127219	-0.00351833	0.0221402	-0.158911	0.873739	NA	AC007563.3
3.88645	0.0401004	0.0821252	0.488442	0.625237	NA	AC007566.1
0	NA	NA	NA	NA	NA	AC007566.2
0	NA	NA	NA	NA	NA	AC007567.1
0	NA	NA	NA	NA	NA	AC007568.1
0.127219	-0.00351833	0.0221402	-0.158911	0.873739	NA	AC007569.1
0.567541	0.0128412	0.0300885	0.47858	0.632237	NA	AC007570.1
0	NA	NA	NA	NA	NA	AC007595.1
0	NA	NA	NA	NA	NA	AC007598.1
0	NA	NA	NA	NA	NA	AC007598.2
0	NA	NA	NA	NA	NA	AC007598.3
0	NA	NA	NA	NA	NA	AC007599.1
0.222714	0.00691865	0.0221402	0.312493	0.754666	NA	AC007599.2
0.340588	0.0159685	0.0253735	0.588901	0.555928	NA	AC007601.1
0	NA	NA	NA	NA	NA	AC007601.2
0.122113	-0.00351833	0.0221402	-0.158911	0.873739	NA	AC007603.1
0	NA	NA	NA	NA	NA	AC007603.2
0	NA	NA	NA	NA	NA	AC007603.3
0.146343	0.00691865	0.0221402	0.312493	0.754666	NA	AC007608.1
0	NA	NA	NA	NA	NA	AC007608.2
0.194245	0.00691865	0.0221402	0.312493	0.754666	NA	AC007608.3
0.61839	0.00621808	0.0353424	0.168538	0.86616	NA	AC007608.4
0	NA	NA	NA	NA	NA	AC007610.1
1.41832	0.0488356	0.0517581	1.00318	0.315775	NA	AC007610.2
0	NA	NA	NA	NA	NA	AC007610.3
5.42396	0.189428	0.0905514	2.18793	0.0286748	NA	AC007610.4
1.76945	0.0311508	0.0568233	0.538871	0.589976	NA	AC007611.1
1.30782	0.00856378	0.0471744	0.181726	0.855798	NA	AC007613.1
4.8299	-0.038678	0.0890919	-0.431227	0.666303	NA	AC007614.1
0	NA	NA	NA	NA	NA	AC007614.2
0	NA	NA	NA	NA	NA	AC007618.1
0.467807	0.0120956	0.0304776	0.37861	0.704978	NA	AC007619.1
0.127219	-0.00351833	0.0221402	-0.158911	0.873739	NA	AC007619.2
0	NA	NA	NA	NA	NA	AC007620.1
0	NA	NA	NA	NA	NA	AC007620.2
0.334514	-0.0112038	0.0250526	-0.472669	0.63645	NA	AC007620.3
1.66449	-0.0343631	0.0531614	-0.654266	0.512941	NA	AC007621.1
0.722246	-0.00274763	0.0356322	-0.0756181	0.939723	NA	AC007622.1
9.09321	0.269264	0.110301	2.50302	0.0123137	NA	AC007622.2
0	NA	NA	NA	NA	NA	AC007631.1
0.698363	-0.0203656	0.0347694	-0.545061	0.585712	NA	AC007637.1
0.122113	-0.00351833	0.0221402	-0.158911	0.873739	NA	AC007638.1
0	NA	NA	NA	NA	NA	AC007638.2
0	NA	NA	NA	NA	NA	AC007639.1
0	NA	NA	NA	NA	NA	AC007652.1
0	NA	NA	NA	NA	NA	AC007655.1
0.6272	-8.86453e-05	0.0335982	-0.00242235	0.998067	NA	AC007656.1
0	NA	NA	NA	NA	NA	AC007656.2
10.5278	0.193259	0.112166	1.74599	0.0808119	NA	AC007663.1
0.684447	-0.0159265	0.0366706	-0.487869	0.625643	NA	AC007663.2
0.273562	0.0018957	0.0233712	0.0811127	0.935352	NA	AC007663.3
7.71878	0.0404883	0.103973	0.393623	0.693859	NA	AC007663.4
2.67031	0.0491848	0.0685074	0.735553	0.462003	NA	AC007666.1
0	NA	NA	NA	NA	NA	AC007671.1
0	NA	NA	NA	NA	NA	AC007673.1
0	NA	NA	NA	NA	NA	AC007677.1
0	NA	NA	NA	NA	NA	AC007679.1
0	NA	NA	NA	NA	NA	AC007679.2
2.54939	0.038535	0.0681471	0.563773	0.572908	NA	AC007681.1
0	NA	NA	NA	NA	NA	AC007682.2
0	NA	NA	NA	NA	NA	AC007682.3
18.7657	-0.028449	0.133657	-0.213591	0.830866	0.959322	AC007683.1
0.445428	0.0162551	0.0255985	0.693921	0.487732	NA	AC007683.2
0.595027	0.00483428	0.0330957	0.125272	0.900308	NA	AC007684.1
0	NA	NA	NA	NA	NA	AC007685.1
0	NA	NA	NA	NA	NA	AC007686.1
0	NA	NA	NA	NA	NA	AC007686.2
16.066	0.187274	0.127872	1.47752	0.139536	0.555197	AC007686.3
1.37832	0.00565497	0.0515459	0.108343	0.913724	NA	AC007686.4
0.2124	-0.00351833	0.0221402	-0.158911	0.873739	NA	AC007687.1
0.61839	0.00621808	0.0353424	0.168538	0.86616	NA	AC007688.1
0	NA	NA	NA	NA	NA	AC007688.2
4.14015	-0.0246538	0.0809988	-0.308909	0.757391	NA	AC007690.1
0	NA	NA	NA	NA	NA	AC007718.1
0	NA	NA	NA	NA	NA	AC007728.1
6.79946	0.00828479	0.101022	0.0812926	0.935209	NA	AC007728.2
0.435114	0.00263405	0.0275163	0.0957268	0.923738	NA	AC007728.3
0	NA	NA	NA	NA	NA	AC007731.1
12.172	0.192884	0.122102	1.59466	0.110788	NA	AC007731.2
0.416959	0.0181738	0.0270555	0.708111	0.478876	NA	AC007731.3
0	NA	NA	NA	NA	NA	AC007731.4
0	NA	NA	NA	NA	NA	AC007731.5
0	NA	NA	NA	NA	NA	AC007738.1
0	NA	NA	NA	NA	NA	AC007741.1
0	NA	NA	NA	NA	NA	AC007742.1
0	NA	NA	NA	NA	NA	AC007742.2
6.94255	0.0978696	0.101008	0.977291	0.328425	NA	AC007743.1
0	NA	NA	NA	NA	NA	AC007744.1
0	NA	NA	NA	NA	NA	AC007749.1
0	NA	NA	NA	NA	NA	AC007750.1
0.406645	0.00251446	0.0268896	0.0935105	0.925498	NA	AC007751.1
0.146343	0.00691865	0.0221402	0.312493	0.754666	NA	AC007751.2
3.2323	0.0405321	0.0733777	0.556427	0.577919	NA	AC007773.1
0	NA	NA	NA	NA	NA	AC007773.3
0.515709	0.0119939	0.0293236	0.413927	0.678928	NA	AC007780.1
0	NA	NA	NA	NA	NA	AC007785.1
0	NA	NA	NA	NA	NA	AC007785.2
4.81982	0.00143825	0.0867148	0.0165583	0.986789	NA	AC007785.3
0.127219	-0.00351833	0.0221402	-0.158911	0.873739	NA	AC007786.1
0	NA	NA	NA	NA	NA	AC007786.2
0	NA	NA	NA	NA	NA	AC007786.3
0	NA	NA	NA	NA	NA	AC007787.1
0.716273	-0.0174848	0.0358718	-0.545415	0.585468	NA	AC007790.1
0	NA	NA	NA	NA	NA	AC007792.1
0	NA	NA	NA	NA	NA	AC007795.1
2.12123	-0.00869648	0.062294	-0.142736	0.886499	NA	AC007823.1
0.127219	-0.00351833	0.0221402	-0.158911	0.873739	NA	AC007834.1
1.2031	-0.0132198	0.0487161	-0.26889	0.788015	NA	AC007834.2
26.7791	0.156891	0.138735	1.12795	0.259341	0.692679	AC007842.1
1.06262	-0.0154225	0.0435193	-0.366567	0.713942	NA	AC007846.1
0	NA	NA	NA	NA	NA	AC007846.2
0.633274	0.0343071	0.0321299	1.08048	0.279927	NA	AC007848.1
0	NA	NA	NA	NA	NA	AC007848.2
0	NA	NA	NA	NA	NA	AC007849.1
0.249333	-0.00911251	0.0226086	-0.352452	0.724499	NA	AC007849.2
0	NA	NA	NA	NA	NA	AC007861.1
0	NA	NA	NA	NA	NA	AC007861.2
0	NA	NA	NA	NA	NA	AC007876.1
25.6037	0.046279	0.140379	0.329127	0.74206	0.933295	AC007878.1
0	NA	NA	NA	NA	NA	AC007879.1
0	NA	NA	NA	NA	NA	AC007879.2
1.34553	-0.032126	0.0504714	-0.667931	0.504178	NA	AC007879.3
0	NA	NA	NA	NA	NA	AC007879.4
0.2124	-0.00351833	0.0221402	-0.158911	0.873739	NA	AC007881.1
0	NA	NA	NA	NA	NA	AC007881.2
1.49708	0.00320167	0.0549002	0.0587288	0.953168	NA	AC007881.3
0	NA	NA	NA	NA	NA	AC007899.1
0.146343	0.00691865	0.0221402	0.312493	0.754666	NA	AC007906.1
35.8615	0.18757	0.144531	1.29053	0.196868	0.631957	AC007906.2
0.435114	0.00263405	0.0275163	0.0957268	0.923738	NA	AC007907.1
0	NA	NA	NA	NA	NA	AC007919.1
0	NA	NA	NA	NA	NA	AC007919.2
0	NA	NA	NA	NA	NA	AC007920.1
0.369057	0.0168313	0.0260449	0.633171	0.526622	NA	AC007920.2
0	NA	NA	NA	NA	NA	AC007922.1
0.439029	0.0200567	0.0258704	0.71494	0.474646	NA	AC007922.2
0	NA	NA	NA	NA	NA	AC007922.3
0	NA	NA	NA	NA	NA	AC007923.1
0	NA	NA	NA	NA	NA	AC007923.2
0	NA	NA	NA	NA	NA	AC007923.3
0	NA	NA	NA	NA	NA	AC007923.4
3.27806	-0.000278926	0.0729594	-0.00385872	0.996921	NA	AC007938.1
4.9368	0.0955573	0.0882681	1.0999	0.271376	NA	AC007938.2
14.4339	0.0734843	0.123029	0.602093	0.547112	0.868926	AC007938.3
0	NA	NA	NA	NA	NA	AC007948.1
0	NA	NA	NA	NA	NA	AC007950.1
0	NA	NA	NA	NA	NA	AC007950.2
0.273562	0.0018957	0.0233712	0.0811127	0.935352	NA	AC007952.1
1.31772	0.0287234	0.0519214	0.560309	0.575268	NA	AC007952.2
0	NA	NA	NA	NA	NA	AC007952.3
0.466941	-0.00395386	0.0283854	-0.134304	0.893162	NA	AC007952.4
0	NA	NA	NA	NA	NA	AC007952.5
0.268456	0.00186894	0.0232067	0.0805348	0.935812	NA	AC007952.6
0	NA	NA	NA	NA	NA	AC007952.7
0	NA	NA	NA	NA	NA	AC007952.8
0	NA	NA	NA	NA	NA	AC007952.9
0	NA	NA	NA	NA	NA	AC007953.1
0	NA	NA	NA	NA	NA	AC007953.2
0.581457	0.0112869	0.0325366	0.432986	0.665025	NA	AC007954.1
0.634796	-0.0170679	0.0317373	-0.478009	0.632644	NA	AC007956.1
0	NA	NA	NA	NA	NA	AC007965.1
0.802321	-0.00680054	0.0410199	-0.166068	0.868103	NA	AC007966.1
0	NA	NA	NA	NA	NA	AC007967.1
0	NA	NA	NA	NA	NA	AC007967.2
0	NA	NA	NA	NA	NA	AC007967.3
184.98	-0.198129	0.134597	-1.47145	0.14117	0.557603	AC007969.1
0.146343	0.00691865	0.0221402	0.312493	0.754666	NA	AC007969.2
0	NA	NA	NA	NA	NA	AC007991.1
10.2902	0.0472965	0.111516	0.421154	0.673643	NA	AC007991.2
9.41634	0.140205	0.105223	1.36319	0.172824	NA	AC007991.3
2.79387	-0.00285896	0.0671111	-0.0427119	0.965931	NA	AC007991.4
0	NA	NA	NA	NA	NA	AC007992.1
0	NA	NA	NA	NA	NA	AC007992.2
0.127219	-0.00351833	0.0221402	-0.158911	0.873739	NA	AC007993.1
0	NA	NA	NA	NA	NA	AC007993.2
0.64262	0.0226488	0.0341135	0.650258	0.515526	NA	AC007993.3
36.766	-0.0496768	0.148018	-0.335562	0.737201	0.932022	AC007996.1
0	NA	NA	NA	NA	NA	AC007998.1
0	NA	NA	NA	NA	NA	AC007998.2
2.00531	-0.0263308	0.0580818	-0.463596	0.642937	NA	AC007998.3
0	NA	NA	NA	NA	NA	AC007998.4
0.249333	-0.00911251	0.0226086	-0.352452	0.724499	NA	AC007998.5
0	NA	NA	NA	NA	NA	AC008011.1
0	NA	NA	NA	NA	NA	AC008011.2
0	NA	NA	NA	NA	NA	AC008012.1
1.38183	0.0192249	0.0457303	0.411759	0.680516	NA	AC008013.1
0	NA	NA	NA	NA	NA	AC008013.2
0	NA	NA	NA	NA	NA	AC008013.3
7.61617	0.0432277	0.0999521	0.433519	0.664638	NA	AC008014.1
0.127219	-0.00351833	0.0221402	-0.158911	0.873739	NA	AC008015.1
0.807427	-0.00653695	0.039242	-0.167079	0.867308	NA	AC008026.1
0	NA	NA	NA	NA	NA	AC008026.2
0.591771	0.0296689	0.0308773	0.99269	0.320861	NA	AC008026.3
0.435114	0.00263405	0.0275163	0.0957268	0.923738	NA	AC008033.1
0	NA	NA	NA	NA	NA	AC008033.2
0	NA	NA	NA	NA	NA	AC008033.3
1.38767	-0.0099781	0.0491198	-0.204797	0.83773	NA	AC008035.1
[truncated: 55,782 more rows]

## Sheet: STITCHvsdel30-440
baseMean	log2FoldChange	lfcSE	stat	pvalue	padj	gene_name
0.966186	0.000691722	0.0294003	0.0234297	0.981307	NA	5S_rRNA
5.06054	0.0965816	0.0632882	1.57315	0.115685	NA	7SK
2.35403	0.00955276	0.0465725	0.203101	0.839056	NA	A1BG
7.37163	0.028314	0.0758893	0.371416	0.710328	NA	A1BG-AS1
0.700896	-0.00183139	0.0255662	-0.0725678	0.94215	NA	A1CF
10.2275	0.185004	0.0831093	2.27843	0.0227007	0.520296	A2M
4.71025	0.0231875	0.0632799	0.369291	0.711911	NA	A2M-AS1
46.9069	-0.115012	0.121747	-0.945133	0.344591	0.99957	A2ML1
0.615187	0.0134647	0.0231296	0.529938	0.596155	NA	A2ML1-AS1
0.202667	-0.00379755	0.015334	-0.247656	0.804401	NA	A2ML1-AS2
1.38982	-0.0451299	0.0352668	-1.45229	0.146421	NA	A2MP1
0.160542	0.00343096	0.015334	0.223749	0.822953	NA	A3GALT2
56.9002	0.101615	0.123093	0.824479	0.409668	0.99957	A4GALT
0.294076	-0.000211527	0.0164687	-0.0128442	0.989752	NA	A4GNT
0	NA	NA	NA	NA	NA	AA06
504.514	0.0269256	0.103535	0.260074	0.794807	0.99957	AAAS
659.044	-0.0812232	0.113234	-0.717198	0.473252	0.99957	AACS
7.8209	-0.0231923	0.0765088	-0.303941	0.761173	0.99957	AACSP1
0	NA	NA	NA	NA	NA	AADAC
0	NA	NA	NA	NA	NA	AADACL2
0	NA	NA	NA	NA	NA	AADACL2-AS1
4.75518	-0.0210459	0.062375	-0.337714	0.735579	NA	AADACL3
0.160569	0.00343096	0.015334	0.223749	0.822953	NA	AADACL4
0	NA	NA	NA	NA	NA	AADACP1
145.779	0.174016	0.124585	1.3969	0.162445	0.973834	AADAT
594.029	-0.0156245	0.103723	-0.150656	0.880247	0.99957	AAGAB
648.146	0.119945	0.106795	1.12305	0.261417	0.99957	AAK1
41.9781	0.0751339	0.118415	0.634794	0.525563	0.99957	AAMDC
859.781	0.0784212	0.0982266	0.798379	0.424651	0.99957	AAMP
2.4878	-0.0234897	0.0461166	-0.508882	0.610835	NA	AANAT
297.148	-0.0679307	0.112192	-0.605478	0.544862	0.99957	AAR2
21.9711	0.0272904	0.104616	0.261401	0.793783	0.99957	AARD
2199.12	-0.189074	0.0900111	-2.10056	0.03568	0.628216	AARS
384.858	-0.0157447	0.117553	-0.133924	0.893463	0.99957	AARS2
52.3659	0.0184782	0.120427	0.153361	0.878114	0.99957	AARSD1
0	NA	NA	NA	NA	NA	AARSP1
209.724	-0.134795	0.117304	-1.14878	0.250649	0.99957	AASDH
398.629	-0.0106515	0.11014	-0.0967296	0.922941	0.99957	AASDHPPT
5142.84	-0.230984	0.120967	-1.90993	0.0561416	0.737882	AASS
3.68361	0.055727	0.0521083	1.11385	0.265343	NA	AATBC
708.717	-0.0586825	0.104059	-0.563977	0.57277	0.99957	AATF
36.3588	-0.0159614	0.115488	-0.137823	0.89038	0.99957	AATK
0.133507	-0.00379755	0.015334	-0.247656	0.804401	NA	AB015752.1
0	NA	NA	NA	NA	NA	AB019440.1
3.4797	0.0341476	0.0563543	0.611918	0.540592	NA	ABALON
147.667	-0.0249942	0.122415	-0.204071	0.838298	0.99957	ABAT
0	NA	NA	NA	NA	NA	ABBA01006766.1
0	NA	NA	NA	NA	NA	ABC7-43041300I9.1
805.41	0.0478326	0.106639	0.448898	0.653505	0.99957	ABCA1
3.45888	-0.0507351	0.0552323	-0.932156	0.351256	NA	ABCA10
22.4856	-0.0500205	0.108501	-0.461466	0.644465	0.99957	ABCA11P
0.790555	0.0199029	0.0258405	0.760712	0.446829	NA	ABCA12
4.53438	0.0678758	0.060386	1.15816	0.246799	NA	ABCA13
2.04378	-0.032521	0.042491	-0.776357	0.437538	NA	ABCA17P
102.87	-0.0322956	0.125075	-0.258178	0.79627	0.99957	ABCA2
130.778	-0.149189	0.124116	-1.20135	0.229616	0.99957	ABCA3
2.12662	-0.0159487	0.0388984	-0.417429	0.676365	NA	ABCA4
180.093	-0.158577	0.125109	-1.26765	0.204924	0.99957	ABCA5
0	NA	NA	NA	NA	NA	ABCA6
164.679	0.217716	0.123614	1.76089	0.0782568	0.826348	ABCA7
1.85905	-0.00778229	0.039968	-0.196043	0.844576	NA	ABCA8
0.454591	0.0055959	0.0190977	0.256741	0.797379	NA	ABCA9
1.53525	-0.00859764	0.0347634	-0.249475	0.802994	NA	ABCA9-AS1
6.85751	0.0265992	0.0721213	0.370784	0.710799	NA	ABCB1
169.381	0.147745	0.119814	1.23338	0.217433	0.99957	ABCB10
1.1795	-0.00933699	0.0347664	-0.270512	0.786767	NA	ABCB10P1
0	NA	NA	NA	NA	NA	ABCB10P3
0.736484	-0.00296162	0.0231364	-0.126351	0.899454	NA	ABCB10P4
0.700923	-0.00169828	0.0240829	-0.0713758	0.943099	NA	ABCB11
9.24519	0.031989	0.0787246	0.408893	0.682618	0.99957	ABCB4
0.931711	-0.0121349	0.0289998	-0.421822	0.673155	NA	ABCB5
31.8488	0.159323	0.115182	1.38645	0.16561	0.977533	ABCB6
417.25	-0.0821005	0.108846	-0.754119	0.450778	0.99957	ABCB7
167.652	0.128557	0.124891	1.03	0.303011	0.99957	ABCB8
36.8548	0.137727	0.117007	1.18235	0.237065	0.99957	ABCB9
1051.14	-0.0826198	0.102324	-0.807366	0.419456	0.99957	ABCC1
212.575	-0.126362	0.120054	-1.05231	0.292658	0.99957	ABCC10
1.9611	-0.000319308	0.0410774	-0.00776476	0.993805	NA	ABCC11
0.379785	-0.0101877	0.0179649	-0.600084	0.54845	NA	ABCC12
1.12083	0.0226395	0.0333251	0.692779	0.488448	NA	ABCC13
12.7364	-0.00188183	0.092494	-0.0203184	0.983789	0.99957	ABCC2
2.67858	-0.0155167	0.0477286	-0.326809	0.743812	NA	ABCC3
155.953	-0.162834	0.119976	-1.35704	0.174768	0.988281	ABCC4
847.092	-0.043585	0.105742	-0.412165	0.680219	0.99957	ABCC5
0.434995	-0.00482114	0.0189164	-0.214275	0.830333	NA	ABCC5-AS1
11.5931	-0.00504533	0.0886461	-0.0569955	0.954549	0.99957	ABCC6
0.577638	-0.0209984	0.0211957	-0.941498	0.34645	NA	ABCC6P1
0.531191	0.00612788	0.021669	0.300741	0.763612	NA	ABCC6P2
13.2911	0.0945692	0.0896513	1.06642	0.286236	0.99957	ABCC8
0.337687	-0.00023414	0.0173228	-0.0135163	0.989216	NA	ABCC9
51.9155	0.02639	0.12296	0.214589	0.830088	0.99957	ABCD1
0	NA	NA	NA	NA	NA	ABCD1P2
0	NA	NA	NA	NA	NA	ABCD1P3
0	NA	NA	NA	NA	NA	ABCD1P4
0	NA	NA	NA	NA	NA	ABCD1P5
0.33766	-0.000234127	0.0173223	-0.0135159	0.989216	NA	ABCD2
506.577	0.00831898	0.106028	0.078459	0.937463	0.99957	ABCD3
674.803	-0.0352658	0.117967	-0.298925	0.764998	0.99957	ABCD4
1274.31	0.00639138	0.102336	0.0624576	0.950198	0.99957	ABCE1
0.133507	-0.00379755	0.015334	-0.247656	0.804401	NA	ABCF1
166.165	0.0405989	0.12118	0.335199	0.737475	0.99957	ABCF2
2.23103	0.0258562	0.0397477	0.675355	0.499451	NA	ABCF2P1
0	NA	NA	NA	NA	NA	ABCF2P2
384.287	-0.0722458	0.105996	-0.681644	0.495464	0.99957	ABCF3
54.6872	0.0666639	0.123182	0.541754	0.587988	0.99957	ABCG1
24.2302	-0.0897565	0.101907	-0.88382	0.376793	0.99957	ABCG2
11.0195	0.0284597	0.088302	0.322478	0.74709	0.99957	ABCG4
0.877988	-0.00826057	0.0264637	-0.317984	0.750497	NA	ABCG5
1.93561	0.000294782	0.0437133	0.00671382	0.994643	NA	ABCG8
7.6317	-0.0448954	0.0765315	-0.586648	0.55744	NA	ABHD1
175.888	-0.0409366	0.125043	-0.327321	0.743425	0.99957	ABHD10
136.158	-0.0363846	0.123736	-0.293996	0.768761	0.99957	ABHD11
0.177118	-0.00379755	0.015334	-0.247656	0.804401	NA	ABHD11-AS1
550.051	0.0109088	0.106166	0.102761	0.918153	0.99957	ABHD12
4.93271	-0.00024302	0.0620072	-0.00394811	0.99685	NA	ABHD12B
285.42	0.0786405	0.118144	0.665674	0.50562	0.99957	ABHD13
9.6393	-0.00410383	0.0814626	-0.0504672	0.95975	0.99957	ABHD14A
0.489066	0.0166875	0.019718	0.777819	0.436676	NA	ABHD14A-ACY1
23.6086	-0.0670081	0.10602	-0.63338	0.526486	0.99957	ABHD14B
11.5896	0.109688	0.0879919	1.25429	0.209738	0.99957	ABHD15
0	NA	NA	NA	NA	NA	ABHD15-AS1
0	NA	NA	NA	NA	NA	ABHD16A
0	NA	NA	NA	NA	NA	ABHD16B
141.137	0.00908288	0.125039	0.0726146	0.942113	0.99957	ABHD17A
0	NA	NA	NA	NA	NA	ABHD17AP1
0	NA	NA	NA	NA	NA	ABHD17AP2
0.471167	-0.00658258	0.0208857	-0.28881	0.772727	NA	ABHD17AP3
0	NA	NA	NA	NA	NA	ABHD17AP4
0.160542	0.00343096	0.015334	0.223749	0.822953	NA	ABHD17AP5
0.202667	-0.00379755	0.015334	-0.247656	0.804401	NA	ABHD17AP6
0	NA	NA	NA	NA	NA	ABHD17AP7
0	NA	NA	NA	NA	NA	ABHD17AP8
0	NA	NA	NA	NA	NA	ABHD17AP9
534.83	-0.0112238	0.104892	-0.107	0.914789	0.99957	ABHD17B
268.29	0.161934	0.116234	1.39367	0.163417	0.974367	ABHD17C
244.103	-0.00196744	0.117226	-0.0167781	0.986614	0.99957	ABHD18
473.317	-0.0479748	0.123683	-0.387969	0.698039	0.99957	ABHD2
94.603	0.196928	0.12518	1.57468	0.11533	0.925145	ABHD3
640.52	-0.0337832	0.105883	-0.319102	0.749649	0.99957	ABHD4
300.634	0.162416	0.116042	1.39958	0.161638	0.973834	ABHD5
25.3883	-0.0786327	0.109031	-0.719423	0.47188	0.99957	ABHD6
123.196	0.295211	0.122918	2.40057	0.0163695	0.437977	ABHD8
405.087	0.102335	0.106235	0.963286	0.335404	0.99957	ABI1
0	NA	NA	NA	NA	NA	ABI1P1
1980.5	-0.00854499	0.0882683	-0.0968082	0.922879	0.99957	ABI2
21.0058	-0.0101026	0.104402	-0.0964887	0.923132	0.99957	ABI3
7.43313	0.106247	0.0704949	1.56376	0.117874	NA	ABI3BP
1242.54	0.0234194	0.0975699	0.240014	0.81032	0.99957	ABL1
454.368	-0.0175174	0.105462	-0.166088	0.868087	0.99957	ABL2
752.366	-0.0170506	0.0982563	-0.173537	0.862229	0.99957	ABLIM1
14.0323	0.0356424	0.0932719	0.382657	0.701974	0.99957	ABLIM2
9.15482	0.0703163	0.0798334	0.889311	0.373836	0.99957	ABLIM3
1.38612	0.0218332	0.034469	0.634612	0.525682	NA	ABO
478.254	-0.0762542	0.108989	-0.699585	0.484186	0.99957	ABR
0.167982	0.00343096	0.015334	0.223749	0.822953	NA	ABRA
757.584	-0.0274145	0.101291	-0.270645	0.786664	0.99957	ABRACL
128.847	-0.174704	0.122976	-1.41988	0.155643	0.967578	ABRAXAS1
234.418	-0.0177468	0.117452	-0.15109	0.879905	0.99957	ABRAXAS2
247.992	0.0605247	0.116206	0.520927	0.602417	0.99957	ABT1
0.267013	-0.0074118	0.015334	-0.405973	0.684762	NA	ABT1P1
60.7263	0.0450187	0.119072	0.378356	0.705166	0.99957	ABTB1
96.4678	0.0482829	0.125224	0.386273	0.699294	0.99957	ABTB2
0	NA	NA	NA	NA	NA	AC000003.1
0	NA	NA	NA	NA	NA	AC000003.2
0	NA	NA	NA	NA	NA	AC000029.1
0	NA	NA	NA	NA	NA	AC000032.1
0	NA	NA	NA	NA	NA	AC000035.1
0	NA	NA	NA	NA	NA	AC000036.1
0	NA	NA	NA	NA	NA	AC000041.1
0	NA	NA	NA	NA	NA	AC000058.1
0	NA	NA	NA	NA	NA	AC000061.1
0	NA	NA	NA	NA	NA	AC000067.1
13.1693	-0.00358312	0.0919975	-0.0390382	0.96886	0.99957	AC000068.1
0.673861	-0.0156396	0.0254388	-0.630126	0.528612	NA	AC000068.2
0	NA	NA	NA	NA	NA	AC000068.3
0	NA	NA	NA	NA	NA	AC000077.1
0	NA	NA	NA	NA	NA	AC000078.1
0	NA	NA	NA	NA	NA	AC000081.1
42.4184	-0.0725764	0.120669	-0.60199	0.547181	0.99957	AC000089.1
0	NA	NA	NA	NA	NA	AC000095.1
0	NA	NA	NA	NA	NA	AC000095.2
0	NA	NA	NA	NA	NA	AC000099.1
0	NA	NA	NA	NA	NA	AC000111.1
0	NA	NA	NA	NA	NA	AC000111.2
1.67733	0.0522286	0.0378604	1.63806	0.10141	NA	AC000120.1
0	NA	NA	NA	NA	NA	AC000120.2
0	NA	NA	NA	NA	NA	AC000120.3
0.985999	-0.0126067	0.0278565	-0.461548	0.644405	NA	AC000123.1
0.3451	-0.000237851	0.0174589	-0.0136235	0.98913	NA	AC000123.2
4.87228	-0.0413904	0.0643745	-0.644449	0.519285	NA	AC000123.3
0	NA	NA	NA	NA	NA	AC000124.1
0	NA	NA	NA	NA	NA	AC000362.1
0.462031	0.00659976	0.0206915	0.287869	0.773447	NA	AC000367.1
0	NA	NA	NA	NA	NA	AC000372.1
0	NA	NA	NA	NA	NA	AC000374.1
1.06524	-0.0174161	0.0305248	-0.58102	0.561227	NA	AC000403.1
0.504155	-0.00676371	0.0212629	-0.322322	0.747209	NA	AC001226.1
0.496716	-0.00676122	0.0211635	-0.320835	0.748335	NA	AC002044.1
0.167982	0.00343096	0.015334	0.223749	0.822953	NA	AC002044.2
0	NA	NA	NA	NA	NA	AC002044.3
7.09576	0.0174146	0.074372	0.234496	0.8146	NA	AC002056.1
0	NA	NA	NA	NA	NA	AC002056.2
0.889613	0.00242417	0.0284605	0.0832529	0.93365	NA	AC002059.1
0.649662	0.0265254	0.0239157	1.09583	0.273154	NA	AC002059.2
0	NA	NA	NA	NA	NA	AC002064.1
2.42949	-0.0664578	0.0478512	-1.45047	0.146928	NA	AC002064.2
0	NA	NA	NA	NA	NA	AC002064.3
0	NA	NA	NA	NA	NA	AC002066.1
0	NA	NA	NA	NA	NA	AC002066.2
0	NA	NA	NA	NA	NA	AC002069.1
0	NA	NA	NA	NA	NA	AC002069.2
0	NA	NA	NA	NA	NA	AC002070.1
0.682787	-0.000849855	0.023887	-0.035808	0.971435	NA	AC002074.1
0	NA	NA	NA	NA	NA	AC002074.2
0	NA	NA	NA	NA	NA	AC002075.1
1.23644	-0.0117598	0.0327971	-0.357875	0.720437	NA	AC002075.2
0.336174	-0.0094226	0.0172805	-0.531082	0.595362	NA	AC002076.1
0	NA	NA	NA	NA	NA	AC002076.2
0.160569	0.00343096	0.015334	0.223749	0.822953	NA	AC002090.1
2.23315	-0.0407449	0.0455709	-0.918256	0.358485	NA	AC002091.1
3.37469	-0.020898	0.0552935	-0.377108	0.706093	NA	AC002091.2
0	NA	NA	NA	NA	NA	AC002094.1
0	NA	NA	NA	NA	NA	AC002094.2
0	NA	NA	NA	NA	NA	AC002094.3
0.588124	0.00145004	0.0227291	0.0572266	0.954365	NA	AC002094.4
3.25603	-0.0143155	0.0544726	-0.262559	0.792891	NA	AC002094.5
0	NA	NA	NA	NA	NA	AC002101.1
0	NA	NA	NA	NA	NA	AC002115.1
0	NA	NA	NA	NA	NA	AC002116.1
2.99755	-0.00491687	0.0463814	-0.104385	0.916864	NA	AC002116.2
0	NA	NA	NA	NA	NA	AC002127.1
0	NA	NA	NA	NA	NA	AC002127.2
13.1787	-0.0748727	0.0912843	-0.819504	0.412499	0.99957	AC002128.1
13.4383	-0.0275324	0.0856834	-0.321985	0.747464	0.99957	AC002128.2
0.167982	0.00343096	0.015334	0.223749	0.822953	NA	AC002306.1
11.4153	-0.0201509	0.0837419	-0.240358	0.810053	0.99957	AC002310.1
0.177118	-0.00379755	0.015334	-0.247656	0.804401	NA	AC002310.2
3.18252	0.00479957	0.0527037	0.0914635	0.927124	NA	AC002310.3
0	NA	NA	NA	NA	NA	AC002310.4
0	NA	NA	NA	NA	NA	AC002310.5
11.2547	0.0861228	0.0878047	0.980158	0.327008	0.99957	AC002310.6
0.489093	0.0193824	0.0212335	0.842427	0.399549	NA	AC002347.1
0.167982	0.00343096	0.015334	0.223749	0.822953	NA	AC002347.2
6.33631	0.00969883	0.0677761	0.143549	0.885857	NA	AC002350.1
2.99249	-0.0274032	0.0483563	-0.571946	0.567358	NA	AC002351.1
0	NA	NA	NA	NA	NA	AC002366.1
0.294076	-0.000211527	0.0164687	-0.0128442	0.989752	NA	AC002367.1
0.301489	-0.000215469	0.0166208	-0.0129638	0.989657	NA	AC002368.1
0	NA	NA	NA	NA	NA	AC002375.1
0	NA	NA	NA	NA	NA	AC002378.1
0	NA	NA	NA	NA	NA	AC002381.1
0	NA	NA	NA	NA	NA	AC002383.1
0	NA	NA	NA	NA	NA	AC002386.1
0	NA	NA	NA	NA	NA	AC002395.1
1.23783	0.0153039	0.0299922	0.53733	0.59104	NA	AC002398.1
0	NA	NA	NA	NA	NA	AC002398.2
1.18252	0.0171899	0.0313156	0.571598	0.567594	NA	AC002400.1
0.167982	0.00343096	0.015334	0.223749	0.822953	NA	AC002401.1
0.454591	0.0055959	0.0190977	0.256741	0.797379	NA	AC002401.2
0.561089	-0.00904144	0.0207809	-0.421631	0.673294	NA	AC002401.3
0	NA	NA	NA	NA	NA	AC002401.4
54.2173	-0.041061	0.121161	-0.3391	0.734534	0.99957	AC002407.1
0	NA	NA	NA	NA	NA	AC002428.1
0.160569	0.00343096	0.015334	0.223749	0.822953	NA	AC002428.2
0	NA	NA	NA	NA	NA	AC002429.1
2.15917	0.0424723	0.0418665	1.07114	0.284107	NA	AC002429.2
0.370649	-0.000250291	0.0179074	-0.0139769	0.988848	NA	AC002451.1
0	NA	NA	NA	NA	NA	AC002451.2
3.59343	0.0114361	0.0508643	0.224772	0.822157	NA	AC002454.1
1.55299	-0.0401743	0.0379764	-1.10709	0.268256	NA	AC002456.1
0	NA	NA	NA	NA	NA	AC002456.2
0	NA	NA	NA	NA	NA	AC002460.1
0.294049	-0.000211512	0.0164681	-0.0128437	0.989752	NA	AC002463.1
0	NA	NA	NA	NA	NA	AC002464.1
0	NA	NA	NA	NA	NA	AC002465.1
11.3962	0.0761231	0.0893773	0.855393	0.392334	0.99957	AC002467.1
0.798231	-0.006442	0.0272563	-0.236524	0.813026	NA	AC002470.1
0	NA	NA	NA	NA	NA	AC002470.2
0	NA	NA	NA	NA	NA	AC002472.1
0	NA	NA	NA	NA	NA	AC002472.2
0.160542	0.00343096	0.015334	0.223749	0.822953	NA	AC002472.3
0	NA	NA	NA	NA	NA	AC002472.4
0	NA	NA	NA	NA	NA	AC002477.1
2.01224	-0.00140951	0.0419981	-0.0336967	0.973119	NA	AC002480.1
0.942334	-0.0117135	0.02775	-0.426866	0.669477	NA	AC002480.2
0	NA	NA	NA	NA	NA	AC002485.1
0	NA	NA	NA	NA	NA	AC002486.1
0.177118	-0.00379755	0.015334	-0.247656	0.804401	NA	AC002486.2
0	NA	NA	NA	NA	NA	AC002487.1
0	NA	NA	NA	NA	NA	AC002504.1
0	NA	NA	NA	NA	NA	AC002511.1
0	NA	NA	NA	NA	NA	AC002511.2
2.36774	0.0258909	0.046107	0.572475	0.567	NA	AC002519.1
0.177118	-0.00379755	0.015334	-0.247656	0.804401	NA	AC002519.2
29.3815	-0.024196	0.110943	-0.218173	0.827294	0.99957	AC002524.1
2.25351	0.0144941	0.0440962	0.328286	0.742695	NA	AC002525.1
0	NA	NA	NA	NA	NA	AC002539.2
0	NA	NA	NA	NA	NA	AC002540.1
0	NA	NA	NA	NA	NA	AC002542.1
0.133507	-0.00379755	0.015334	-0.247656	0.804401	NA	AC002543.1
4.23337	0.0144543	0.059254	0.245978	0.805699	NA	AC002545.1
0	NA	NA	NA	NA	NA	AC002546.1
1.88914	0.0308694	0.0402677	0.802895	0.422036	NA	AC002550.1
8.30792	0.0475014	0.0751161	0.630961	0.528066	0.99957	AC002550.2
0.336174	-0.0094226	0.0172805	-0.531082	0.595362	NA	AC002551.1
9.05723	-0.0356769	0.0827628	-0.431488	0.666114	0.99957	AC002553.1
5.1283	0.0453468	0.0577271	0.797977	0.424884	NA	AC002553.2
1.27396	0.0260367	0.0331793	0.812601	0.416447	NA	AC002558.1
0	NA	NA	NA	NA	NA	AC002558.2
2.52465	0.0669157	0.0407173	2.04634	0.0407232	NA	AC002558.3
1.48404	0.0218122	0.038409	0.577923	0.563316	NA	AC002563.1
0	NA	NA	NA	NA	NA	AC002978.1
0	NA	NA	NA	NA	NA	AC002979.1
0	NA	NA	NA	NA	NA	AC002981.1
0	NA	NA	NA	NA	NA	AC002984.1
0	NA	NA	NA	NA	NA	AC002985.1
0	NA	NA	NA	NA	NA	AC002992.1
0	NA	NA	NA	NA	NA	AC002994.1
0	NA	NA	NA	NA	NA	AC002996.1
0	NA	NA	NA	NA	NA	AC003001.1
0.202667	-0.00379755	0.015334	-0.247656	0.804401	NA	AC003001.2
0	NA	NA	NA	NA	NA	AC003002.1
0.160542	0.00343096	0.015334	0.223749	0.822953	NA	AC003002.2
0.354236	-0.00811488	0.016042	-0.511633	0.608908	NA	AC003002.3
0	NA	NA	NA	NA	NA	AC003005.1
1.17058	-0.0238298	0.0337134	-0.726876	0.467302	NA	AC003005.2
0	NA	NA	NA	NA	NA	AC003006.1
0.177118	-0.00379755	0.015334	-0.247656	0.804401	NA	AC003009.1
0	NA	NA	NA	NA	NA	AC003029.1
0	NA	NA	NA	NA	NA	AC003035.1
0.321111	0.00866798	0.0170011	0.493117	0.62193	NA	AC003035.2
0	NA	NA	NA	NA	NA	AC003043.1
0.513292	-0.0209894	0.0214667	-0.894896	0.370843	NA	AC003043.2
0	NA	NA	NA	NA	NA	AC003045.1
0	NA	NA	NA	NA	NA	AC003070.1
0	NA	NA	NA	NA	NA	AC003070.2
0	NA	NA	NA	NA	NA	AC003071.1
0	NA	NA	NA	NA	NA	AC003071.2
1.44628	0.00729837	0.0348764	0.208562	0.83479	NA	AC003072.1
0.160542	0.00343096	0.015334	0.223749	0.822953	NA	AC003079.1
0	NA	NA	NA	NA	NA	AC003080.1
0	NA	NA	NA	NA	NA	AC003084.1
0	NA	NA	NA	NA	NA	AC003087.1
0	NA	NA	NA	NA	NA	AC003092.1
0	NA	NA	NA	NA	NA	AC003092.2
0	NA	NA	NA	NA	NA	AC003098.1
0	NA	NA	NA	NA	NA	AC003101.1
0	NA	NA	NA	NA	NA	AC003101.2
0	NA	NA	NA	NA	NA	AC003101.3
28.1537	0.082776	0.107768	0.768421	0.442237	0.99957	AC003102.1
0	NA	NA	NA	NA	NA	AC003658.1
0.328524	0.00879972	0.0171292	0.504965	0.613583	NA	AC003659.1
0	NA	NA	NA	NA	NA	AC003666.1
0	NA	NA	NA	NA	NA	AC003669.1
49.7931	0.00809287	0.112984	0.0715368	0.942971	0.99957	AC003681.1
1.05171	0.0104796	0.0279142	0.388384	0.697732	NA	AC003682.1
0	NA	NA	NA	NA	NA	AC003684.1
0	NA	NA	NA	NA	NA	AC003685.1
0.167982	0.00343096	0.015334	0.223749	0.822953	NA	AC003685.2
0	NA	NA	NA	NA	NA	AC003686.1
0	NA	NA	NA	NA	NA	AC003687.1
0	NA	NA	NA	NA	NA	AC003688.1
0	NA	NA	NA	NA	NA	AC003688.2
0	NA	NA	NA	NA	NA	AC003950.1
2.21627	0.0117129	0.0405059	0.28798	0.773362	NA	AC003956.1
0.167982	0.00343096	0.015334	0.223749	0.822953	NA	AC003957.1
0	NA	NA	NA	NA	NA	AC003958.1
0	NA	NA	NA	NA	NA	AC003958.2
0.294076	-0.000211527	0.0164687	-0.0128442	0.989752	NA	AC003965.1
0	NA	NA	NA	NA	NA	AC003965.2
0.294076	-0.000211527	0.0164687	-0.0128442	0.989752	NA	AC003968.1
0	NA	NA	NA	NA	NA	AC003973.1
0	NA	NA	NA	NA	NA	AC003973.2
0	NA	NA	NA	NA	NA	AC003973.3
2.79421	-0.0530238	0.0510838	-1.06015	0.289078	NA	AC003975.1
0	NA	NA	NA	NA	NA	AC003982.1
0	NA	NA	NA	NA	NA	AC003984.1
0	NA	NA	NA	NA	NA	AC003985.1
0	NA	NA	NA	NA	NA	AC003985.2
0	NA	NA	NA	NA	NA	AC003986.1
0	NA	NA	NA	NA	NA	AC003986.2
0	NA	NA	NA	NA	NA	AC003986.3
0	NA	NA	NA	NA	NA	AC003988.1
0	NA	NA	NA	NA	NA	AC003989.1
0	NA	NA	NA	NA	NA	AC003989.2
0.612113	-0.0117562	0.0232052	-0.517144	0.605055	NA	AC003991.1
0.772682	-0.00576936	0.0269971	-0.212368	0.83182	NA	AC003991.2
0	NA	NA	NA	NA	NA	AC003992.1
0.756133	0.0077789	0.025242	0.300784	0.763579	NA	AC004000.1
0	NA	NA	NA	NA	NA	AC004004.1
0	NA	NA	NA	NA	NA	AC004006.1
0	NA	NA	NA	NA	NA	AC004009.1
0	NA	NA	NA	NA	NA	AC004009.2
0	NA	NA	NA	NA	NA	AC004009.3
0	NA	NA	NA	NA	NA	AC004012.1
0	NA	NA	NA	NA	NA	AC004014.1
0	NA	NA	NA	NA	NA	AC004014.2
0	NA	NA	NA	NA	NA	AC004016.1
3.66439	-0.00292713	0.0566196	-0.0518359	0.958659	NA	AC004017.1
0	NA	NA	NA	NA	NA	AC004019.18
0.202667	-0.00379755	0.015334	-0.247656	0.804401	NA	AC004022.1
0	NA	NA	NA	NA	NA	AC004022.2
0.74562	-0.0168589	0.0252351	-0.7069	0.479629	NA	AC004023.1
0.294049	-0.000211512	0.0164681	-0.0128437	0.989752	NA	AC004024.1
2.43995	-0.0363744	0.0474188	-0.777126	0.437085	NA	AC004034.1
2.05998	0.00905748	0.0442904	0.202941	0.839181	NA	AC004039.1
0	NA	NA	NA	NA	NA	AC004052.1
0	NA	NA	NA	NA	NA	AC004053.1
0	NA	NA	NA	NA	NA	AC004054.1
0.133507	-0.00379755	0.015334	-0.247656	0.804401	NA	AC004057.1
0	NA	NA	NA	NA	NA	AC004062.1
0	NA	NA	NA	NA	NA	AC004063.1
6.40616	0.00831537	0.0679235	0.123785	0.901486	NA	AC004066.1
0	NA	NA	NA	NA	NA	AC004066.2
5.00734	-0.0311018	0.062287	-0.499494	0.617432	NA	AC004067.1
0.427556	-0.00476202	0.0188044	-0.212789	0.831492	NA	AC004069.1
0	NA	NA	NA	NA	NA	AC004069.2
0	NA	NA	NA	NA	NA	AC004074.1
0.883731	0.0048945	0.0262198	0.190762	0.848712	NA	AC004076.1
19.1183	0.112865	0.0961796	1.18064	0.237745	0.99957	AC004076.2
0	NA	NA	NA	NA	NA	AC004079.1
0	NA	NA	NA	NA	NA	AC004080.1
0	NA	NA	NA	NA	NA	AC004080.2
0	NA	NA	NA	NA	NA	AC004080.3
0	NA	NA	NA	NA	NA	AC004080.4
0	NA	NA	NA	NA	NA	AC004080.5
0	NA	NA	NA	NA	NA	AC004080.6
3.03992	0.0360484	0.0523924	0.690133	0.490111	NA	AC004112.1
0.160569	0.00343096	0.015334	0.223749	0.822953	NA	AC004129.1
0	NA	NA	NA	NA	NA	AC004129.2
0	NA	NA	NA	NA	NA	AC004129.3
3.69157	-0.000400943	0.0525529	-0.00773152	0.993831	NA	AC004130.1
0.160569	0.00343096	0.015334	0.223749	0.822953	NA	AC004134.1
0.540327	-0.00804129	0.0216815	-0.37909	0.704621	NA	AC004147.1
18.2093	-0.0663987	0.0997225	-0.668045	0.504105	0.99957	AC004147.2
0	NA	NA	NA	NA	NA	AC004147.3
0	NA	NA	NA	NA	NA	AC004147.4
0	NA	NA	NA	NA	NA	AC004147.5
0	NA	NA	NA	NA	NA	AC004148.1
104.686	-0.175186	0.125167	-1.39956	0.161645	0.973834	AC004148.2
0.160542	0.00343096	0.015334	0.223749	0.822953	NA	AC004156.1
2.4203	0.029169	0.0409008	0.746584	0.455315	NA	AC004158.1
1.21067	0.0131871	0.0300942	0.436047	0.662803	NA	AC004160.1
0.160542	0.00343096	0.015334	0.223749	0.822953	NA	AC004160.2
0	NA	NA	NA	NA	NA	AC004217.1
0	NA	NA	NA	NA	NA	AC004217.2
3.10481	-0.0647152	0.0526885	-1.26366	0.206352	NA	AC004221.1
0	NA	NA	NA	NA	NA	AC004223.1
0.160542	0.00343096	0.015334	0.223749	0.822953	NA	AC004223.2
0.706822	-0.0143416	0.024357	-0.621756	0.534102	NA	AC004223.3
0	NA	NA	NA	NA	NA	AC004224.1
0	NA	NA	NA	NA	NA	AC004224.2
0	NA	NA	NA	NA	NA	AC004231.1
0.177118	-0.00379755	0.015334	-0.247656	0.804401	NA	AC004231.3
0	NA	NA	NA	NA	NA	AC004232.1
0	NA	NA	NA	NA	NA	AC004232.2
2.6843	0.00880549	0.0496685	0.175773	0.860472	NA	AC004232.3
1.71225	0.0106505	0.0384694	0.281461	0.778357	NA	AC004233.1
7.2363	0.0448724	0.0728753	0.614638	0.538794	NA	AC004233.2
22.766	-0.0299439	0.107697	-0.277836	0.781138	0.99957	AC004233.3
1.41493	0.0216882	0.0360314	0.605595	0.544784	NA	AC004233.4
2.64413	-0.0312577	0.0497059	-0.634282	0.525896	NA	AC004241.1
0.177118	-0.00379755	0.015334	-0.247656	0.804401	NA	AC004241.2
6.08183	-0.0182342	0.0677553	-0.270532	0.786751	NA	AC004241.3
1.75714	-0.0366623	0.0413696	-0.90693	0.364444	NA	AC004241.4
0	NA	NA	NA	NA	NA	AC004241.5
8.01886	-0.0644181	0.0757843	-0.856839	0.391534	0.99957	AC004253.1
0.202667	-0.00379755	0.015334	-0.247656	0.804401	NA	AC004253.2
0.894564	-0.021214	0.0267735	-0.858263	0.390747	NA	AC004257.1
2.37813	0.0555175	0.0434753	1.34474	0.178709	NA	AC004263.1
1.70021	-0.0304604	0.039415	-0.795879	0.426102	NA	AC004264.1
0	NA	NA	NA	NA	NA	AC004264.2
0.160569	0.00343096	0.015334	0.223749	0.822953	NA	AC004381.1
0	NA	NA	NA	NA	NA	AC004381.2
0	NA	NA	NA	NA	NA	AC004381.3
4.22093	0.0403978	0.0603668	0.672271	0.501411	NA	AC004383.1
2.91577	-0.0116591	0.0514294	-0.228726	0.819082	NA	AC004386.1
0	NA	NA	NA	NA	NA	AC004386.2
0	NA	NA	NA	NA	NA	AC004408.1
0	NA	NA	NA	NA	NA	AC004408.2
0	NA	NA	NA	NA	NA	AC004415.1
0	NA	NA	NA	NA	NA	AC004448.1
1.05759	0.00910416	0.0306254	0.292484	0.769916	NA	AC004448.2
0	NA	NA	NA	NA	NA	AC004448.3
0.951387	0.000267746	0.0273616	0.0097195	0.992245	NA	AC004449.1
10.2527	0.0304687	0.0853276	0.356532	0.721442	0.99957	AC004453.1
0.82524	0.00663089	0.027516	0.242961	0.808036	NA	AC004453.2
0	NA	NA	NA	NA	NA	AC004458.1
0.167982	0.00343096	0.015334	0.223749	0.822953	NA	AC004460.1
0.370649	-0.000250291	0.0179074	-0.0139769	0.988848	NA	AC004461.1
3.44231	-0.0363545	0.0554224	-0.660212	0.509118	NA	AC004461.2
2.26743	-0.0795569	0.0438469	-2.12261	0.0337863	NA	AC004466.1
2.78248	-0.0338532	0.0494491	-0.697233	0.485657	NA	AC004466.2
1.5216	-0.0340391	0.0358813	-1.0034	0.315666	NA	AC004466.3
0	NA	NA	NA	NA	NA	AC004467.1
0.167982	0.00343096	0.015334	0.223749	0.822953	NA	AC004470.1
1.37611	0.0237221	0.0340691	0.737641	0.460733	NA	AC004471.1
1.61731	0.0427997	0.0386294	1.162	0.245237	NA	AC004471.2
11.2348	-0.0943989	0.0887688	-1.066	0.286423	0.99957	AC004477.1
0	NA	NA	NA	NA	NA	AC004477.2
8.7107	0.00507189	0.0778891	0.065357	0.94789	0.99957	AC004477.3
1.95856	0.00132149	0.0397928	0.0337919	0.973043	NA	AC004485.1
0	NA	NA	NA	NA	NA	AC004486.1
0.733885	-0.00213822	0.024427	-0.0894642	0.928713	NA	AC004490.1
2.61056	0.0574686	0.048904	1.21395	0.224765	NA	AC004491.1
4.14702	0.0297052	0.0597076	0.495644	0.620146	NA	AC004492.1
1.21246	-0.00905298	0.033595	-0.273149	0.784739	NA	AC004494.1
0	NA	NA	NA	NA	NA	AC004494.2
0	NA	NA	NA	NA	NA	AC004520.1
0	NA	NA	NA	NA	NA	AC004522.1
3.51454	-0.0103491	0.0539488	-0.192556	0.847307	NA	AC004522.2
0	NA	NA	NA	NA	NA	AC004528.1
0	NA	NA	NA	NA	NA	AC004528.2
7.24606	-0.0434878	0.0742617	-0.584906	0.558611	NA	AC004540.1
3.28008	0.069158	0.0541364	1.32278	0.185908	NA	AC004540.2
0	NA	NA	NA	NA	NA	AC004542.1
0	NA	NA	NA	NA	NA	AC004542.2
0.547767	-0.00788958	0.0217987	-0.380555	0.703534	NA	AC004543.1
0	NA	NA	NA	NA	NA	AC004551.1
0.951387	0.000267746	0.0273616	0.0097195	0.992245	NA	AC004552.1
0.160569	0.00343096	0.015334	0.223749	0.822953	NA	AC004554.1
0.672137	-4.43157e-05	0.0237636	-0.00187314	0.998505	NA	AC004554.2
0.733858	-0.00213896	0.0244268	-0.0894956	0.928688	NA	AC004584.1
0.167982	0.00343096	0.015334	0.223749	0.822953	NA	AC004584.2
1.11648	-0.0446454	0.0306791	-1.71339	0.0866413	NA	AC004584.3
0.202667	-0.00379755	0.015334	-0.247656	0.804401	NA	AC004585.1
0	NA	NA	NA	NA	NA	AC004585.2
0	NA	NA	NA	NA	NA	AC004590.1
0	NA	NA	NA	NA	NA	AC004593.1
0	NA	NA	NA	NA	NA	AC004593.2
3.52772	0.00411274	0.054683	0.0755958	0.939741	NA	AC004594.1
0	NA	NA	NA	NA	NA	AC004595.1
1.8549	-0.00938204	0.0401956	-0.234834	0.814337	NA	AC004596.1
0	NA	NA	NA	NA	NA	AC004597.1
4.69455	0.0484484	0.0626138	0.776736	0.437314	NA	AC004623.1
0.481653	0.016423	0.0196161	0.767764	0.442627	NA	AC004637.1
0	NA	NA	NA	NA	NA	AC004655.1
359.684	0.543326	0.113001	4.80596	1.54013e-06	0.000515221	AC004656.1
0	NA	NA	NA	NA	NA	AC004672.1
0	NA	NA	NA	NA	NA	AC004672.2
0.133507	-0.00379755	0.015334	-0.247656	0.804401	NA	AC004673.1
0	NA	NA	NA	NA	NA	AC004674.1
1.0667	-0.00461738	0.0306644	-0.148764	0.88174	NA	AC004678.1
2.04078	0.0239414	0.0417383	0.589532	0.555505	NA	AC004678.2
0.267013	-0.0074118	0.015334	-0.405973	0.684762	NA	AC004687.1
1.56189	-0.0229966	0.0359283	-0.652252	0.514239	NA	AC004687.2
0	NA	NA	NA	NA	NA	AC004690.1
0.498203	0.00491162	0.019749	0.265163	0.790884	NA	AC004690.2
0.565876	-0.00718224	0.0204443	-0.384054	0.700939	NA	AC004691.1
0	NA	NA	NA	NA	NA	AC004691.2
0.133507	-0.00379755	0.015334	-0.247656	0.804401	NA	AC004692.1
0.489093	0.0193824	0.0212335	0.842427	0.399549	NA	AC004692.2
1.56496	0.00134134	0.0381646	0.0347558	0.972274	NA	AC004696.1
0.808854	-0.00727562	0.0273733	-0.266384	0.789943	NA	AC004696.2
0	NA	NA	NA	NA	NA	AC004699.1
0	NA	NA	NA	NA	NA	AC004702.1
0.160542	0.00343096	0.015334	0.223749	0.822953	NA	AC004704.1
7.42047	-0.0236357	0.0757271	-0.31239	0.754744	NA	AC004706.1
0	NA	NA	NA	NA	NA	AC004706.2
66.4052	0.0241895	0.124393	0.194766	0.845576	0.99957	AC004706.3
0.523751	0.00508468	0.0200767	0.269769	0.787338	NA	AC004707.1
0	NA	NA	NA	NA	NA	AC004745.1
0	NA	NA	NA	NA	NA	AC004754.1
1.36081	-0.00414863	0.0354194	-0.115308	0.908201	NA	AC004765.1
0	NA	NA	NA	NA	NA	AC004769.1
2.31385	-0.0281891	0.0448947	-0.636179	0.52466	NA	AC004771.1
0.177118	-0.00379755	0.015334	-0.247656	0.804401	NA	AC004771.2
5.43033	0.0142409	0.0663069	0.213579	0.830876	NA	AC004771.3
0	NA	NA	NA	NA	NA	AC004771.4
3.23072	-0.0427556	0.0541824	-0.795581	0.426275	NA	AC004771.5
0	NA	NA	NA	NA	NA	AC004775.1
0	NA	NA	NA	NA	NA	AC004777.1
0	NA	NA	NA	NA	NA	AC004784.1
0	NA	NA	NA	NA	NA	AC004790.1
0	NA	NA	NA	NA	NA	AC004790.2
4.86361	-0.00804412	0.0618124	-0.131532	0.895354	NA	AC004801.1
6.76337	0.0170437	0.0668688	0.257972	0.796428	NA	AC004801.2
0.321084	0.00717869	0.015478	0.447411	0.654578	NA	AC004801.3
0	NA	NA	NA	NA	NA	AC004801.4
0	NA	NA	NA	NA	NA	AC004801.5
2.71747	-0.0198597	0.0490074	-0.404774	0.685644	NA	AC004801.6
0.691897	-0.0123769	0.022395	-0.570218	0.56853	NA	AC004801.7
18.5913	0.0389636	0.0903634	0.429475	0.667577	0.99957	AC004803.1
0	NA	NA	NA	NA	NA	AC004805.1
0	NA	NA	NA	NA	NA	AC004805.2
0	NA	NA	NA	NA	NA	AC004805.3
0	NA	NA	NA	NA	NA	AC004808.1
0	NA	NA	NA	NA	NA	AC004808.2
0	NA	NA	NA	NA	NA	AC004812.1
24.7888	-0.0619003	0.111279	-0.556224	0.578058	0.99957	AC004812.2
49.6767	-0.0426063	0.122107	-0.34868	0.727329	0.99957	AC004816.1
1.80366	0.0197518	0.040215	0.497113	0.619109	NA	AC004816.2
0	NA	NA	NA	NA	NA	AC004817.1
0.160542	0.00343096	0.015334	0.223749	0.822953	NA	AC004817.2
0.160569	0.00343096	0.015334	0.223749	0.822953	NA	AC004817.3
0.33766	-0.000234127	0.0173223	-0.0135159	0.989216	NA	AC004817.4
0	NA	NA	NA	NA	NA	AC004824.1
0	NA	NA	NA	NA	NA	AC004824.2
0	NA	NA	NA	NA	NA	AC004825.1
6.28489	0.0076532	0.0626123	0.122945	0.902151	NA	AC004825.2
0.267013	-0.0074118	0.015334	-0.405973	0.684762	NA	AC004828.1
21.796	-0.098349	0.100877	-0.974479	0.329819	0.99957	AC004830.1
0	NA	NA	NA	NA	NA	AC004832.1
0	NA	NA	NA	NA	NA	AC004832.2
0	NA	NA	NA	NA	NA	AC004832.3
0.577638	-0.0209984	0.0211957	-0.941498	0.34645	NA	AC004832.4
0.267013	-0.0074118	0.015334	-0.405973	0.684762	NA	AC004832.5
0.267013	-0.0074118	0.015334	-0.405973	0.684762	NA	AC004832.6
3.57256	-0.0259792	0.0522052	-0.49626	0.619711	NA	AC004834.1
1.0081	0.0117769	0.0276271	0.437592	0.661682	NA	AC004835.1
0	NA	NA	NA	NA	NA	AC004835.2
0.160542	0.00343096	0.015334	0.223749	0.822953	NA	AC004836.1
0	NA	NA	NA	NA	NA	AC004837.1
2.56719	0.0265147	0.0460171	0.578527	0.562909	NA	AC004837.2
0	NA	NA	NA	NA	NA	AC004837.3
0.868851	0.00526546	0.0278999	0.19239	0.847436	NA	AC004839.1
0.489066	0.0166875	0.019718	0.777819	0.436676	NA	AC004840.1
0	NA	NA	NA	NA	NA	AC004840.2
10.0662	-0.00886308	0.081427	-0.108618	0.913505	0.99957	AC004846.1
7.75281	0.0524421	0.0772328	0.678604	0.497389	NA	AC004846.2
0.167982	0.00343096	0.015334	0.223749	0.822953	NA	AC004847.1
0.160542	0.00343096	0.015334	0.223749	0.822953	NA	AC004851.1
0	NA	NA	NA	NA	NA	AC004852.1
0	NA	NA	NA	NA	NA	AC004852.2
0	NA	NA	NA	NA	NA	AC004852.3
0	NA	NA	NA	NA	NA	AC004853.1
0	NA	NA	NA	NA	NA	AC004854.1
0.816294	-0.00705441	0.0274417	-0.258223	0.796235	NA	AC004854.2
0.167982	0.00343096	0.015334	0.223749	0.822953	NA	AC004858.1
0	NA	NA	NA	NA	NA	AC004862.1
0	NA	NA	NA	NA	NA	AC004865.1
0.771169	-0.017523	0.0255164	-0.731796	0.464293	NA	AC004865.2
0	NA	NA	NA	NA	NA	AC004866.1
0	NA	NA	NA	NA	NA	AC004866.2
0	NA	NA	NA	NA	NA	AC004869.1
0	NA	NA	NA	NA	NA	AC004869.2
0	NA	NA	NA	NA	NA	AC004870.1
0	NA	NA	NA	NA	NA	AC004870.2
0	NA	NA	NA	NA	NA	AC004870.3
0	NA	NA	NA	NA	NA	AC004870.4
0	NA	NA	NA	NA	NA	AC004872.1
0.202667	-0.00379755	0.015334	-0.247656	0.804401	NA	AC004875.1
0.462031	0.00659976	0.0206915	0.287869	0.773447	NA	AC004877.1
0.6047	-0.0119405	0.0230901	-0.515053	0.606516	NA	AC004877.2
0	NA	NA	NA	NA	NA	AC004878.3
0	NA	NA	NA	NA	NA	AC004878.5
0	NA	NA	NA	NA	NA	AC004878.6
0	NA	NA	NA	NA	NA	AC004878.7
0	NA	NA	NA	NA	NA	AC004882.1
0	NA	NA	NA	NA	NA	AC004882.2
0.531218	0.00612863	0.0216693	0.300776	0.763585	NA	AC004884.1
0.167982	0.00343096	0.015334	0.223749	0.822953	NA	AC004884.2
0.630039	0.0138751	0.0233188	0.546579	0.584668	NA	AC004888.1
14.9067	-0.0332224	0.0960911	-0.345512	0.72971	0.99957	AC004889.1
8.21151	-0.052175	0.0767767	-0.681256	0.49571	0.99957	AC004890.1
27.0535	-0.133578	0.108142	-1.24026	0.214881	0.99957	AC004890.2
0.876528	-0.0236295	0.0284069	-0.894112	0.371262	NA	AC004890.3
1.11929	0.00691515	0.0310666	0.22212	0.82422	NA	AC004893.1
0	NA	NA	NA	NA	NA	AC004893.2
0.933225	0.00118169	0.0306283	0.038086	0.969619	NA	AC004895.1
1.40004	0.0100514	0.0337301	0.305404	0.760059	NA	AC004898.1
0.294076	-0.000211527	0.0164687	-0.0128442	0.989752	NA	AC004899.1
0	NA	NA	NA	NA	NA	AC004899.2
0.427582	-0.00476223	0.0188048	-0.212794	0.831487	NA	AC004900.1
0.160542	0.00343096	0.015334	0.223749	0.822953	NA	AC004906.1
0.657048	0.0232387	0.0223959	1.02711	0.30437	NA	AC004908.1
3.10778	-0.00695003	0.0487104	-0.142563	0.886636	NA	AC004908.2
0.335964	0.00741444	0.0157291	0.469856	0.638458	NA	AC004908.3
0.202667	-0.00379755	0.015334	-0.247656	0.804401	NA	AC004910.1
0	NA	NA	NA	NA	NA	AC004911.1
0	NA	NA	NA	NA	NA	AC004917.1
4.92937	0.0211026	0.056011	0.380822	0.703335	NA	AC004918.1
29.6845	0.00873034	0.11498	0.0758983	0.9395	0.99957	AC004918.3
0	NA	NA	NA	NA	NA	AC004920.1
0.160569	0.00343096	0.015334	0.223749	0.822953	NA	AC004921.1
0.160542	0.00343096	0.015334	0.223749	0.822953	NA	AC004922.1
3.00848	0.0403317	0.0520147	0.791527	0.428637	NA	AC004923.1
0	NA	NA	NA	NA	NA	AC004923.2
0	NA	NA	NA	NA	NA	AC004923.3
5.01806	-0.045868	0.0653332	-0.707474	0.479272	NA	AC004923.4
0	NA	NA	NA	NA	NA	AC004924.1
1.5246	-0.00922904	0.0383585	-0.242386	0.808481	NA	AC004925.1
0	NA	NA	NA	NA	NA	AC004930.1
0	NA	NA	NA	NA	NA	AC004936.1
0	NA	NA	NA	NA	NA	AC004938.1
0.133507	-0.00379755	0.015334	-0.247656	0.804401	NA	AC004941.1
0.444131	-0.0160962	0.0191176	-0.732469	0.463883	NA	AC004941.2
10.5875	0.0563612	0.0861397	0.656834	0.511288	0.99957	AC004943.1
44.1728	-0.0234623	0.121471	-0.19339	0.846653	0.99957	AC004943.2
0	NA	NA	NA	NA	NA	AC004943.3
0	NA	NA	NA	NA	NA	AC004944.1
0	NA	NA	NA	NA	NA	AC004945.1
0	NA	NA	NA	NA	NA	AC004946.1
0	NA	NA	NA	NA	NA	AC004947.1
0	NA	NA	NA	NA	NA	AC004948.1
0	NA	NA	NA	NA	NA	AC004949.1
0.96026	0.0153776	0.0310542	0.499687	0.617296	NA	AC004951.1
2.29705	0.0215089	0.0432835	0.492458	0.622396	NA	AC004951.2
0.202667	-0.00379755	0.015334	-0.247656	0.804401	NA	AC004951.3
1.03537	-0.00125298	0.0299468	-0.0422849	0.966272	NA	AC004951.4
0	NA	NA	NA	NA	NA	AC004965.1
6.08893	-0.0373918	0.0703386	-0.530551	0.59573	NA	AC004967.1
6.81045	-0.0378602	0.0710731	-0.530898	0.595489	NA	AC004967.2
0.167982	0.00343096	0.015334	0.223749	0.822953	NA	AC004969.1
0	NA	NA	NA	NA	NA	AC004972.1
0.167982	0.00343096	0.015334	0.223749	0.822953	NA	AC004973.1
0.160542	0.00343096	0.015334	0.223749	0.822953	NA	AC004974.1
2.53575	0.0336628	0.0480332	0.717365	0.473149	NA	AC004975.1
0	NA	NA	NA	NA	NA	AC004975.2
14.8229	-0.00700251	0.0927262	-0.0752732	0.939997	0.99957	AC004980.1
0.547767	-0.00788958	0.0217987	-0.380555	0.703534	NA	AC004980.2
0	NA	NA	NA	NA	NA	AC004980.3
0	NA	NA	NA	NA	NA	AC004980.4
6.09166	0.0146181	0.0684085	0.212658	0.831594	NA	AC004982.1
20.9282	-0.0654678	0.106609	-0.61447	0.538905	0.99957	AC004982.2
0	NA	NA	NA	NA	NA	AC004986.1
0.301489	-0.000215469	0.0166208	-0.0129638	0.989657	NA	AC004987.1
130.62	-0.129212	0.122278	-1.05706	0.290485	0.99957	AC004987.2
0	NA	NA	NA	NA	NA	AC004987.3
0	NA	NA	NA	NA	NA	AC004987.4
0.321138	0.00717955	0.0154789	0.447492	0.65452	NA	AC004988.1
3.38994	0.00881342	0.0530801	0.167289	0.867142	NA	AC004990.1
0	NA	NA	NA	NA	NA	AC004994.1
0.167982	0.00343096	0.015334	0.223749	0.822953	NA	AC004997.1
1.0039	0.0125324	0.0298801	0.428954	0.667957	NA	AC005000.1
0	NA	NA	NA	NA	NA	AC005000.2
0.177118	-0.00379755	0.015334	-0.247656	0.804401	NA	AC005002.1
0	NA	NA	NA	NA	NA	AC005002.2
0.177118	-0.00379755	0.015334	-0.247656	0.804401	NA	AC005005.1
0	NA	NA	NA	NA	NA	AC005005.2
2.84653	-0.00862402	0.0481516	-0.179811	0.857301	NA	AC005005.3
0.805854	-0.028425	0.0245975	-1.24355	0.213666	NA	AC005005.4
0.167982	0.00343096	0.015334	0.223749	0.822953	NA	AC005006.1
0	NA	NA	NA	NA	NA	AC005008.1
0	NA	NA	NA	NA	NA	AC005008.2
0.310625	-0.00893978	0.016834	-0.490926	0.623479	NA	AC005009.1
0.301489	-0.000215469	0.0166208	-0.0129638	0.989657	NA	AC005009.2
0	NA	NA	NA	NA	NA	AC005011.1
0.513082	0.00528934	0.0199448	0.284267	0.776206	NA	AC005013.1
0.859715	0.0182045	0.0267362	0.779875	0.435464	NA	AC005014.1
1.22309	-0.00888152	0.0317854	-0.283443	0.776837	NA	AC005014.2
0	NA	NA	NA	NA	NA	AC005014.3
0.310625	-0.00893978	0.016834	-0.490926	0.623479	NA	AC005019.1
0.167982	0.00343096	0.015334	0.223749	0.822953	NA	AC005019.2
1.23032	0.0244858	0.0310012	0.81338	0.416	NA	AC005020.1
0	NA	NA	NA	NA	NA	AC005020.2
0.160569	0.00343096	0.015334	0.223749	0.822953	NA	AC005021.1
0	NA	NA	NA	NA	NA	AC005033.1
0	NA	NA	NA	NA	NA	AC005034.1
0.673834	-0.0156403	0.0254384	-0.630119	0.528617	NA	AC005034.2
114.517	0.0259565	0.12377	0.209699	0.833903	0.99957	AC005034.3
0.478607	-0.00658886	0.0209904	-0.290349	0.771549	NA	AC005034.4
6.4815	-0.133392	0.0721561	-1.89971	0.0574718	NA	AC005034.5
0.177118	-0.00379755	0.015334	-0.247656	0.804401	NA	AC005037.1
0	NA	NA	NA	NA	NA	AC005037.2
0	NA	NA	NA	NA	NA	AC005040.1
0.167982	0.00343096	0.015334	0.223749	0.822953	NA	AC005041.1
0	NA	NA	NA	NA	NA	AC005041.2
0.202667	-0.00379755	0.015334	-0.247656	0.804401	NA	AC005041.3
2.34684	-0.0274152	0.0441445	-0.631478	0.527728	NA	AC005042.1
0	NA	NA	NA	NA	NA	AC005042.2
0	NA	NA	NA	NA	NA	AC005042.3
4.7456	0.0427219	0.0599238	0.718685	0.472335	NA	AC005046.1
0	NA	NA	NA	NA	NA	AC005048.1
0	NA	NA	NA	NA	NA	AC005050.1
1.63394	0.0279016	0.038584	0.739753	0.45945	NA	AC005052.1
17.0274	-0.159131	0.0997414	-1.60272	0.108996	0.914364	AC005062.1
0.649662	0.0265254	0.0239157	1.09583	0.273154	NA	AC005064.1
0	NA	NA	NA	NA	NA	AC005066.1
0	NA	NA	NA	NA	NA	AC005070.1
0.160569	0.00343096	0.015334	0.223749	0.822953	NA	AC005070.2
11.5372	-0.0206772	0.0839217	-0.24716	0.804785	0.99957	AC005070.3
0.321111	0.00866798	0.0170011	0.493117	0.62193	NA	AC005071.1
0.691733	0.0119237	0.0242362	0.555923	0.578264	NA	AC005072.1
18.0144	0.0429566	0.101835	0.423234	0.672124	0.99957	AC005076.1
0.966186	0.000691722	0.0294003	0.0234297	0.981307	NA	AC005077.1
4.64606	-0.0884689	0.0635479	-1.42398	0.154451	NA	AC005077.2
0	NA	NA	NA	NA	NA	AC005077.3
18.6666	0.0121322	0.0966585	0.124907	0.900598	0.99957	AC005077.4
0	NA	NA	NA	NA	NA	AC005077.9
1.18694	-0.00839209	0.0334247	-0.253354	0.799994	NA	AC005082.1
0	NA	NA	NA	NA	NA	AC005082.2
18.0003	0.00735342	0.101405	0.0724548	0.94224	0.99957	AC005083.1
0	NA	NA	NA	NA	NA	AC005084.1
0	NA	NA	NA	NA	NA	AC005086.1
0	NA	NA	NA	NA	NA	AC005086.2
0.294049	-0.000211512	0.0164681	-0.0128437	0.989752	NA	AC005086.3
0.167982	0.00343096	0.015334	0.223749	0.822953	NA	AC005086.4
0	NA	NA	NA	NA	NA	AC005088.1
4.0335	-0.00674788	0.0568838	-0.118215	0.905898	NA	AC005089.1
0	NA	NA	NA	NA	NA	AC005090.1
0.639149	0.000407363	0.0248734	0.0162669	0.987021	NA	AC005091.1
0.160569	0.00343096	0.015334	0.223749	0.822953	NA	AC005094.1
0.615213	0.0115589	0.021378	0.488574	0.625143	NA	AC005096.1
0.46947	0.00582049	0.0192807	0.275844	0.782668	NA	AC005099.1
0	NA	NA	NA	NA	NA	AC005100.1
0.481627	0.0136924	0.0179294	0.69748	0.485502	NA	AC005102.1
11.7523	0.0427163	0.0778933	0.547822	0.583814	0.99957	AC005104.1
0.294049	-0.000211512	0.0164681	-0.0128437	0.989752	NA	AC005104.2
0	NA	NA	NA	NA	NA	AC005105.1
0	NA	NA	NA	NA	NA	AC005144.1
0	NA	NA	NA	NA	NA	AC005150.1
0.40052	-0.0121371	0.0168399	-0.602186	0.547051	NA	AC005154.1
0.363236	-0.000246706	0.0177794	-0.013876	0.988929	NA	AC005154.2
0	NA	NA	NA	NA	NA	AC005154.3
0.6902	-0.000572706	0.0223699	-0.0258015	0.979416	NA	AC005154.4
0	NA	NA	NA	NA	NA	AC005154.5
0.481653	0.016423	0.0196161	0.767764	0.442627	NA	AC005156.1
0.337687	-0.00023414	0.0173228	-0.0135163	0.989216	NA	AC005159.1
0	NA	NA	NA	NA	NA	AC005160.1
0	NA	NA	NA	NA	NA	AC005161.1
0.267013	-0.0074118	0.015334	-0.405973	0.684762	NA	AC005162.1
0	NA	NA	NA	NA	NA	AC005162.2
1.79612	0.0182392	0.0386566	0.476892	0.633439	NA	AC005162.3
0.83589	0.0050596	0.0260323	0.196267	0.844401	NA	AC005165.1
2.15495	-0.0181117	0.039582	-0.462845	0.643476	NA	AC005165.2
0	NA	NA	NA	NA	NA	AC005176.1
0	NA	NA	NA	NA	NA	AC005176.2
0	NA	NA	NA	NA	NA	AC005178.1
3.70212	-0.00126537	0.0503571	-0.0254519	0.979695	NA	AC005180.1
3.08895	0.07202	0.050318	1.50012	0.133582	NA	AC005180.2
0	NA	NA	NA	NA	NA	AC005181.1
0.160569	0.00343096	0.015334	0.223749	0.822953	NA	AC005183.1
0	NA	NA	NA	NA	NA	AC005185.1
0	NA	NA	NA	NA	NA	AC005186.1
0	NA	NA	NA	NA	NA	AC005189.1
0	NA	NA	NA	NA	NA	AC005191.1
0	NA	NA	NA	NA	NA	AC005195.1
2.85797	0.0295403	0.0496646	0.59411	0.552438	NA	AC005197.1
0	NA	NA	NA	NA	NA	AC005208.1
0	NA	NA	NA	NA	NA	AC005209.1
0	NA	NA	NA	NA	NA	AC005215.1
0.337687	-0.00023414	0.0173228	-0.0135163	0.989216	NA	AC005220.1
9.92018	-0.0918707	0.0835171	-1.10484	0.269227	0.99957	AC005224.1
0.664698	-0.000275825	0.0251637	-0.0109906	0.991231	NA	AC005224.2
1.45504	0.0418052	0.033249	1.40836	0.159025	NA	AC005224.3
0.882173	0.00208598	0.0267612	0.076187	0.93927	NA	AC005225.1
0.177118	-0.00379755	0.015334	-0.247656	0.804401	NA	AC005225.2
0	NA	NA	NA	NA	NA	AC005225.3
1.2783	0.000796632	0.0332911	0.0237742	0.981033	NA	AC005225.4
5.84641	-0.0113065	0.0682682	-0.166122	0.868061	NA	AC005229.1
0	NA	NA	NA	NA	NA	AC005229.2
0	NA	NA	NA	NA	NA	AC005229.3
28.3681	-0.00303065	0.112272	-0.0270756	0.978399	0.99957	AC005229.4
0.167982	0.00343096	0.015334	0.223749	0.822953	NA	AC005230.1
0.202667	-0.00379755	0.015334	-0.247656	0.804401	NA	AC005232.1
0.167982	0.00343096	0.015334	0.223749	0.822953	NA	AC005234.1
0	NA	NA	NA	NA	NA	AC005237.1
0.294049	-0.000211512	0.0164681	-0.0128437	0.989752	NA	AC005237.2
0.531218	0.00612863	0.0216693	0.300776	0.763585	NA	AC005244.1
0	NA	NA	NA	NA	NA	AC005244.2
0	NA	NA	NA	NA	NA	AC005252.1
0	NA	NA	NA	NA	NA	AC005252.2
0	NA	NA	NA	NA	NA	AC005252.3
13.5868	0.0272237	0.0941384	0.28905	0.772543	0.99957	AC005253.1
0	NA	NA	NA	NA	NA	AC005253.2
0	NA	NA	NA	NA	NA	AC005255.1
0	NA	NA	NA	NA	NA	AC005256.1
0	NA	NA	NA	NA	NA	AC005258.1
105.521	0.314145	0.122351	2.57575	0.0100023	0.335323	AC005261.1
4.92148	0.00899451	0.0617948	0.144538	0.885075	NA	AC005261.2
13.7542	-0.00161315	0.0949524	-0.0170135	0.986426	0.99957	AC005261.3
2.52534	0.0046631	0.0456051	0.102877	0.91806	NA	AC005261.4
4.20827	0.0807152	0.0589804	1.40302	0.160612	NA	AC005261.5
0	NA	NA	NA	NA	NA	AC005262.1
0	NA	NA	NA	NA	NA	AC005262.2
0	NA	NA	NA	NA	NA	AC005264.1
0.462031	0.00659976	0.0206915	0.287869	0.773447	NA	AC005274.1
0	NA	NA	NA	NA	NA	AC005277.1
1.36234	-0.000664305	0.0328885	-0.0203325	0.983778	NA	AC005277.2
0	NA	NA	NA	NA	NA	AC005280.1
0	NA	NA	NA	NA	NA	AC005280.2
0	NA	NA	NA	NA	NA	AC005280.3
0	NA	NA	NA	NA	NA	AC005281.1
0	NA	NA	NA	NA	NA	AC005284.1
124.234	0.0758341	0.124281	0.61008	0.541808	0.99957	AC005288.1
0.167982	0.00343096	0.015334	0.223749	0.822953	NA	AC005291.1
0	NA	NA	NA	NA	NA	AC005291.2
0.133507	-0.00379755	0.015334	-0.247656	0.804401	NA	AC005293.1
0	NA	NA	NA	NA	NA	AC005294.1
0	NA	NA	NA	NA	NA	AC005296.1
0	NA	NA	NA	NA	NA	AC005297.1
0	NA	NA	NA	NA	NA	AC005297.2
0	NA	NA	NA	NA	NA	AC005297.3
0.46947	0.00582049	0.0192807	0.275844	0.782668	NA	AC005300.1
0	NA	NA	NA	NA	NA	AC005301.1
0	NA	NA	NA	NA	NA	AC005303.1
0	NA	NA	NA	NA	NA	AC005304.1
0	NA	NA	NA	NA	NA	AC005304.2
0	NA	NA	NA	NA	NA	AC005304.3
0	NA	NA	NA	NA	NA	AC005306.1
11.3558	-0.00903239	0.0872617	-0.103524	0.917547	0.99957	AC005307.1
0	NA	NA	NA	NA	NA	AC005323.1
0	NA	NA	NA	NA	NA	AC005323.2
0	NA	NA	NA	NA	NA	AC005324.1
0	NA	NA	NA	NA	NA	AC005324.2
0.328524	0.00879972	0.0171292	0.504965	0.613583	NA	AC005324.3
0	NA	NA	NA	NA	NA	AC005324.4
0.834193	0.0211158	0.0279935	0.817994	0.413361	NA	AC005324.5
0	NA	NA	NA	NA	NA	AC005324.6
8.49174	-0.0812181	0.0768597	-1.0673	0.285834	0.99957	AC005326.1
0.96026	0.0153776	0.0310542	0.499687	0.617296	NA	AC005329.1
0	NA	NA	NA	NA	NA	AC005329.2
1.08489	-0.00471531	0.0288086	-0.162497	0.870915	NA	AC005329.3
3.15724	-0.0241745	0.0541091	-0.448966	0.653457	NA	AC005330.1
2.63046	0.0263395	0.0452151	0.602422	0.546893	NA	AC005332.1
0	NA	NA	NA	NA	NA	AC005332.2
2.7877	0.050766	0.0509302	1.01915	0.308131	NA	AC005332.3
22.7253	-0.0310276	0.107711	-0.287518	0.773716	0.99957	AC005332.4
3.45415	0.0349579	0.0563523	0.625155	0.531869	NA	AC005332.5
37.6233	-0.0490435	0.119338	-0.410887	0.681155	0.99957	AC005332.6
0.514779	-0.00684042	0.0199342	-0.323734	0.746139	NA	AC005332.7
0.630249	-0.0126241	0.0234147	-0.543078	0.587076	NA	AC005336.1
3.23514	0.0277045	0.0539201	0.514851	0.606657	NA	AC005336.2
0	NA	NA	NA	NA	NA	AC005336.3
0	NA	NA	NA	NA	NA	AC005339.1
0.328524	0.00879972	0.0171292	0.504965	0.613583	NA	AC005341.1
0.379785	-0.0101877	0.0179649	-0.600084	0.54845	NA	AC005342.1
0	NA	NA	NA	NA	NA	AC005342.2
1.84531	0.0579483	0.0392917	1.75997	0.0784123	NA	AC005343.1
0	NA	NA	NA	NA	NA	AC005344.1
0	NA	NA	NA	NA	NA	AC005345.1
0.513082	0.00528934	0.0199448	0.284267	0.776206	NA	AC005351.1
5.75429	-0.0199111	0.0674373	-0.295483	0.767625	NA	AC005355.1
0	NA	NA	NA	NA	NA	AC005357.1
0	NA	NA	NA	NA	NA	AC005357.2
0	NA	NA	NA	NA	NA	AC005358.1
0.46968	-0.0166549	0.0194431	-0.767601	0.442725	NA	AC005358.2
0	NA	NA	NA	NA	NA	AC005363.1
1.04279	-0.000951969	0.0280818	-0.0342814	0.972653	NA	AC005363.2
0	NA	NA	NA	NA	NA	AC005370.1
0	NA	NA	NA	NA	NA	AC005375.1
0	NA	NA	NA	NA	NA	AC005377.1
0.294049	-0.000211512	0.0164681	-0.0128437	0.989752	NA	AC005379.1
0.496716	-0.00676122	0.0211635	-0.320835	0.748335	NA	AC005381.1
0.337687	-0.00023414	0.0173228	-0.0135163	0.989216	NA	AC005383.1
3.53239	-0.0695051	0.0558997	-1.27212	0.20333	NA	AC005387.1
4.28551	-0.00169611	0.0614236	-0.0276229	0.977963	NA	AC005387.2
0.160542	0.00343096	0.015334	0.223749	0.822953	NA	AC005391.1
0	NA	NA	NA	NA	NA	AC005392.1
0.531218	0.00612863	0.0216693	0.300776	0.763585	NA	AC005392.2
0	NA	NA	NA	NA	NA	AC005392.3
1.53641	-0.0267155	0.0386141	-0.699545	0.484211	NA	AC005393.1
0.160569	0.00343096	0.015334	0.223749	0.822953	NA	AC005394.1
4.36358	-0.0758879	0.061455	-1.25717	0.208693	NA	AC005394.2
0	NA	NA	NA	NA	NA	AC005399.1
0.802738	0.0272556	0.0242215	1.20379	0.228672	NA	AC005410.1
0.177118	-0.00379755	0.015334	-0.247656	0.804401	NA	AC005410.2
0	NA	NA	NA	NA	NA	AC005412.1
0.708309	-0.00161428	0.0256451	-0.0639265	0.949029	NA	AC005414.1
3.71043	0.0195747	0.0540667	0.361655	0.71761	NA	AC005476.1
3.05807	0.0241305	0.0512677	0.477958	0.63268	NA	AC005476.2
0	NA	NA	NA	NA	NA	AC005477.1
1.22579	-0.0117831	0.0337827	-0.347435	0.728265	NA	AC005479.1
1.70151	0.0195451	0.0369883	0.52827	0.597312	NA	AC005479.2
0.336174	-0.0094226	0.0172805	-0.531082	0.595362	NA	AC005480.1
0	NA	NA	NA	NA	NA	AC005480.2
1.07747	-0.0139799	0.0285837	-0.507541	0.611776	NA	AC005481.1
0	NA	NA	NA	NA	NA	AC005482.1
0	NA	NA	NA	NA	NA	AC005486.1
0	NA	NA	NA	NA	NA	AC005487.1
0	NA	NA	NA	NA	NA	AC005488.1
0	NA	NA	NA	NA	NA	AC005493.1
0.160569	0.00343096	0.015334	0.223749	0.822953	NA	AC005495.1
0	NA	NA	NA	NA	NA	AC005498.1
0.294076	-0.000211527	0.0164687	-0.0128442	0.989752	NA	AC005498.2
4.86796	0.0637319	0.0614988	1.06498	0.286884	NA	AC005498.3
0	NA	NA	NA	NA	NA	AC005513.1
0	NA	NA	NA	NA	NA	AC005514.1
0	NA	NA	NA	NA	NA	AC005515.1
0	NA	NA	NA	NA	NA	AC005518.1
0	NA	NA	NA	NA	NA	AC005518.2
51.6293	-0.0738937	0.114925	-0.642353	0.520644	0.99957	AC005519.1
0	NA	NA	NA	NA	NA	AC005520.1
0.160542	0.00343096	0.015334	0.223749	0.822953	NA	AC005520.2
0.177118	-0.00379755	0.015334	-0.247656	0.804401	NA	AC005520.3
0	NA	NA	NA	NA	NA	AC005520.4
1.47186	0.00780729	0.0380832	0.205094	0.837499	NA	AC005520.5
0	NA	NA	NA	NA	NA	AC005521.1
0	NA	NA	NA	NA	NA	AC005522.1
0.328524	0.00879972	0.0171292	0.504965	0.613583	NA	AC005523.1
0	NA	NA	NA	NA	NA	AC005523.2
3.3178	-0.0925421	0.0514958	-1.92835	0.0538121	NA	AC005524.1
0.294076	-0.000211527	0.0164687	-0.0128442	0.989752	NA	AC005529.1
0	NA	NA	NA	NA	NA	AC005531.1
1.2814	0.0294117	0.0351872	0.861054	0.389208	NA	AC005532.1
0.160542	0.00343096	0.015334	0.223749	0.822953	NA	AC005532.2
0.834166	0.0187645	0.0264195	0.773055	0.43949	NA	AC005534.1
1.0281	-0.0297043	0.0303959	-1.07431	0.282683	NA	AC005534.2
1.20505	-0.0100158	0.0349341	-0.290108	0.771733	NA	AC005537.1
0	NA	NA	NA	NA	NA	AC005538.1
0	NA	NA	NA	NA	NA	AC005538.2
0	NA	NA	NA	NA	NA	AC005539.1
0.167982	0.00343096	0.015334	0.223749	0.822953	NA	AC005540.1
0.498229	0.00573583	0.0212545	0.286445	0.774537	NA	AC005544.1
0	NA	NA	NA	NA	NA	AC005544.2
0.951307	0.000265628	0.0273609	0.00964267	0.992306	NA	AC005546.1
0.177118	-0.00379755	0.015334	-0.247656	0.804401	NA	AC005548.1
0	NA	NA	NA	NA	NA	AC005549.1
0	NA	NA	NA	NA	NA	AC005549.2
0	NA	NA	NA	NA	NA	AC005549.3
0.133507	-0.00379755	0.015334	-0.247656	0.804401	NA	AC005550.1
0	NA	NA	NA	NA	NA	AC005550.2
0	NA	NA	NA	NA	NA	AC005551.1
0	NA	NA	NA	NA	NA	AC005552.1
0	NA	NA	NA	NA	NA	AC005559.1
0.177118	-0.00379755	0.015334	-0.247656	0.804401	NA	AC005578.1
0.160569	0.00343096	0.015334	0.223749	0.822953	NA	AC005580.1
9.60612	0.0213493	0.0834512	0.256306	0.797714	0.99957	AC005586.1
2.24017	0.0298424	0.0461399	0.649891	0.515763	NA	AC005586.2
0	NA	NA	NA	NA	NA	AC005587.1
0	NA	NA	NA	NA	NA	AC005588.1
47.6258	0.128225	0.106571	1.20502	0.228194	0.99957	AC005592.1
0.321111	0.00866798	0.0170011	0.493117	0.62193	NA	AC005593.1
0	NA	NA	NA	NA	NA	AC005597.1
0	NA	NA	NA	NA	NA	AC005606.1
0.133507	-0.00379755	0.015334	-0.247656	0.804401	NA	AC005606.2
0	NA	NA	NA	NA	NA	AC005609.1
0	NA	NA	NA	NA	NA	AC005609.3
0	NA	NA	NA	NA	NA	AC005609.4
0.133507	-0.00379755	0.015334	-0.247656	0.804401	NA	AC005609.5
0.167982	0.00343096	0.015334	0.223749	0.822953	NA	AC005614.1
0	NA	NA	NA	NA	NA	AC005614.2
0	NA	NA	NA	NA	NA	AC005616.1
14.6229	0.0028448	0.0949057	0.0300303	0.976043	0.99957	AC005618.1
0	NA	NA	NA	NA	NA	AC005618.2
0	NA	NA	NA	NA	NA	AC005618.3
0	NA	NA	NA	NA	NA	AC005621.1
0.33766	-0.000234127	0.0173223	-0.0135159	0.989216	NA	AC005622.1
0.133507	-0.00379755	0.015334	-0.247656	0.804401	NA	AC005625.1
0	NA	NA	NA	NA	NA	AC005631.1
0	NA	NA	NA	NA	NA	AC005632.1
3.81441	0.00445207	0.0558783	0.0798617	0.936347	NA	AC005632.2
0	NA	NA	NA	NA	NA	AC005632.3
0.160569	0.00343096	0.015334	0.223749	0.822953	NA	AC005632.4
1.92224	0.0117122	0.038858	0.30114	0.763308	NA	AC005670.1
0	NA	NA	NA	NA	NA	AC005670.2
0	NA	NA	NA	NA	NA	AC005674.1
109.997	0.0485108	0.125249	0.387518	0.698373	0.99957	AC005674.2
1.54361	0.00302289	0.0347324	0.085913	0.931536	NA	AC005682.1
0	NA	NA	NA	NA	NA	AC005686.1
0	NA	NA	NA	NA	NA	AC005691.1
0	NA	NA	NA	NA	NA	AC005692.1
0.167982	0.00343096	0.015334	0.223749	0.822953	NA	AC005692.2
0.160569	0.00343096	0.015334	0.223749	0.822953	NA	AC005692.3
2.09443	0.0225076	0.0441035	0.511685	0.608871	NA	AC005695.1
0	NA	NA	NA	NA	NA	AC005695.2
0.177118	-0.00379755	0.015334	-0.247656	0.804401	NA	AC005695.3
1.1208	0.0221731	0.0329791	0.686201	0.492586	NA	AC005696.1
0	NA	NA	NA	NA	NA	AC005696.2
0.177118	-0.00379755	0.015334	-0.247656	0.804401	NA	AC005696.3
73.7526	-0.0587379	0.123212	-0.476277	0.633877	0.99957	AC005696.4
0	NA	NA	NA	NA	NA	AC005697.1
0.336174	-0.0094226	0.0172805	-0.531082	0.595362	NA	AC005697.2
0	NA	NA	NA	NA	NA	AC005699.1
0	NA	NA	NA	NA	NA	AC005701.1
2.92143	0.0122452	0.0476422	0.256715	0.797399	NA	AC005702.1
0	NA	NA	NA	NA	NA	AC005702.2
2.31872	-0.0266095	0.0448712	-0.606517	0.544171	NA	AC005702.3
3.48992	0.00245715	0.0556919	0.0437828	0.965078	NA	AC005702.4
0	NA	NA	NA	NA	NA	AC005703.1
0	NA	NA	NA	NA	NA	AC005703.2
0	NA	NA	NA	NA	NA	AC005703.3
0.133507	-0.00379755	0.015334	-0.247656	0.804401	NA	AC005703.4
0	NA	NA	NA	NA	NA	AC005703.5
0	NA	NA	NA	NA	NA	AC005703.6
0	NA	NA	NA	NA	NA	AC005722.1
0	NA	NA	NA	NA	NA	AC005722.2
0	NA	NA	NA	NA	NA	AC005722.3
1.94612	0.02972	0.0434633	0.6923	0.488749	NA	AC005725.1
36.6578	0.0273848	0.116424	0.235237	0.814024	0.99957	AC005726.1
1.88935	0.00362897	0.041061	0.0893613	0.928795	NA	AC005726.2
18.1225	0.0381204	0.10033	0.380254	0.703757	0.99957	AC005726.3
0	NA	NA	NA	NA	NA	AC005726.4
0	NA	NA	NA	NA	NA	AC005726.5
0	NA	NA	NA	NA	NA	AC005730.1
0.649662	0.0265254	0.0239157	1.09583	0.273154	NA	AC005730.2
0.363209	-0.000246693	0.0177789	-0.0138756	0.988929	NA	AC005730.3
1.99431	-0.0293078	0.0424852	-0.702439	0.482406	NA	AC005736.1
0	NA	NA	NA	NA	NA	AC005736.2
0.82678	0.0209087	0.0279176	0.810812	0.417474	NA	AC005740.1
0.160569	0.00343096	0.015334	0.223749	0.822953	NA	AC005740.2
0.294049	-0.000211512	0.0164681	-0.0128437	0.989752	NA	AC005740.3
0.321111	0.00866798	0.0170011	0.493117	0.62193	NA	AC005740.4
0	NA	NA	NA	NA	NA	AC005741.1
1.42991	-0.00611911	0.0360023	-0.169082	0.865732	NA	AC005746.1
0	NA	NA	NA	NA	NA	AC005746.2
0.3451	-0.000237851	0.0174589	-0.0136235	0.98913	NA	AC005746.3
1.60838	0.0282127	0.0382754	0.75174	0.452208	NA	AC005753.1
0.321084	0.00717869	0.015478	0.447411	0.654578	NA	AC005757.1
0	NA	NA	NA	NA	NA	AC005758.1
1.23471	0.00213018	0.0342317	0.0613457	0.951084	NA	AC005759.1
0	NA	NA	NA	NA	NA	AC005771.1
0.177118	-0.00379755	0.015334	-0.247656	0.804401	NA	AC005772.1
0	NA	NA	NA	NA	NA	AC005774.1
0.9677	0.0155882	0.0311181	0.506198	0.612718	NA	AC005775.1
2.61825	0.0138044	0.0431835	0.325787	0.744586	NA	AC005776.1
9.13945	0.0634145	0.0813922	0.784575	0.432703	0.99957	AC005776.2
0	NA	NA	NA	NA	NA	AC005777.1
0.177118	-0.00379755	0.015334	-0.247656	0.804401	NA	AC005779.1
0	NA	NA	NA	NA	NA	AC005779.2
0	NA	NA	NA	NA	NA	AC005783.1
9.15448	0.190325	0.0731927	2.79331	0.00521721	0.217011	AC005785.1
0.133507	-0.00379755	0.015334	-0.247656	0.804401	NA	AC005786.1
0	NA	NA	NA	NA	NA	AC005786.2
0	NA	NA	NA	NA	NA	AC005786.3
0.630222	-0.0126248	0.0234143	-0.54307	0.587081	NA	AC005786.4
0	NA	NA	NA	NA	NA	AC005789.1
0.859952	-0.00860661	0.0278607	-0.313517	0.753888	NA	AC005790.1
0	NA	NA	NA	NA	NA	AC005796.1
0.160542	0.00343096	0.015334	0.223749	0.822953	NA	AC005798.1
0	NA	NA	NA	NA	NA	AC005808.1
0.46968	-0.0166549	0.0194431	-0.767601	0.442725	NA	AC005821.1
12.7393	0.0118829	0.0899484	0.132282	0.894762	0.99957	AC005822.1
0	NA	NA	NA	NA	NA	AC005823.1
0	NA	NA	NA	NA	NA	AC005823.2
0.321138	0.00717955	0.0154789	0.447492	0.65452	NA	AC005828.1
0	NA	NA	NA	NA	NA	AC005828.2
0	NA	NA	NA	NA	NA	AC005828.3
0.167982	0.00343096	0.015334	0.223749	0.822953	NA	AC005828.4
0	NA	NA	NA	NA	NA	AC005828.5
0	NA	NA	NA	NA	NA	AC005828.6
0	NA	NA	NA	NA	NA	AC005828.7
0	NA	NA	NA	NA	NA	AC005829.1
0	NA	NA	NA	NA	NA	AC005829.2
0.6226	0.0153994	0.0247083	0.573613	0.56623	NA	AC005831.1
0	NA	NA	NA	NA	NA	AC005832.1
0.691787	0.0119252	0.0242368	0.555982	0.578223	NA	AC005832.2
1.19594	0.00526141	0.031911	0.166926	0.867428	NA	AC005832.3
0	NA	NA	NA	NA	NA	AC005832.4
22.8328	0.0633985	0.109011	0.581767	0.560723	0.99957	AC005833.1
0	NA	NA	NA	NA	NA	AC005833.2
3.27721	0.012704	0.0544564	0.233487	0.815384	NA	AC005837.1
0	NA	NA	NA	NA	NA	AC005837.2
0.328551	0.00880019	0.0171297	0.505008	0.613553	NA	AC005837.3
0	NA	NA	NA	NA	NA	AC005838.1
3.72879	-0.00739587	0.0582215	-0.126673	0.8992	NA	AC005838.2
47.9859	0.170451	0.116527	1.46409	0.143168	0.956984	AC005839.1
0.523778	0.00592091	0.0215753	0.291005	0.771048	NA	AC005840.1
0.658745	0.010491	0.0220107	0.499932	0.617123	NA	AC005840.2
2.62452	0.0521607	0.047667	1.13791	0.25516	NA	AC005840.3
1.05926	-0.00411661	0.0286104	-0.142115	0.886989	NA	AC005840.4
0	NA	NA	NA	NA	NA	AC005841.1
1.57393	0.0148995	0.0379104	0.391606	0.695349	NA	AC005842.1
0	NA	NA	NA	NA	NA	AC005845.1
0.177118	-0.00379755	0.015334	-0.247656	0.804401	NA	AC005856.1
0	NA	NA	NA	NA	NA	AC005858.1
0	NA	NA	NA	NA	NA	AC005858.2
0	NA	NA	NA	NA	NA	AC005858.3
0.427582	-0.00476223	0.0188048	-0.212794	0.831487	NA	AC005863.1
1.32347	0.0142746	0.036343	0.397181	0.691234	NA	AC005865.1
3.79051	-0.00941269	0.0580092	-0.162355	0.871026	NA	AC005865.2
0	NA	NA	NA	NA	NA	AC005868.1
0	NA	NA	NA	NA	NA	AC005871.1
0	NA	NA	NA	NA	NA	AC005871.2
0	NA	NA	NA	NA	NA	AC005884.1
0.202667	-0.00379755	0.015334	-0.247656	0.804401	NA	AC005884.2
0.160542	0.00343096	0.015334	0.223749	0.822953	NA	AC005899.1
0	NA	NA	NA	NA	NA	AC005899.2
0	NA	NA	NA	NA	NA	AC005899.3
0	NA	NA	NA	NA	NA	AC005899.4
0	NA	NA	NA	NA	NA	AC005899.5
0.328524	0.00879972	0.0171292	0.504965	0.613583	NA	AC005899.6
0	NA	NA	NA	NA	NA	AC005899.7
1.09228	-0.00588488	0.0324124	-0.18018	0.857011	NA	AC005899.8
0	NA	NA	NA	NA	NA	AC005901.1
0.160542	0.00343096	0.015334	0.223749	0.822953	NA	AC005906.1
3.5594	-0.0228091	0.0510165	-0.448269	0.653959	NA	AC005906.2
0	NA	NA	NA	NA	NA	AC005906.3
0.133507	-0.00379755	0.015334	-0.247656	0.804401	NA	AC005908.1
0.160542	0.00343096	0.015334	0.223749	0.822953	NA	AC005908.2
0	NA	NA	NA	NA	NA	AC005909.1
4.07826	0.0600873	0.0589421	1.03645	0.299991	NA	AC005911.1
565.828	0.13056	0.110299	1.18352	0.236603	0.99957	AC005912.1
0	NA	NA	NA	NA	NA	AC005912.2
0	NA	NA	NA	NA	NA	AC005915.1
0	NA	NA	NA	NA	NA	AC005920.1
0	NA	NA	NA	NA	NA	AC005920.2
0	NA	NA	NA	NA	NA	AC005920.3
0	NA	NA	NA	NA	NA	AC005920.4
0	NA	NA	NA	NA	NA	AC005921.1
0	NA	NA	NA	NA	NA	AC005921.2
0.951334	0.000273219	0.0292774	0.00926241	0.99261	NA	AC005921.3
0	NA	NA	NA	NA	NA	AC005921.4
0	NA	NA	NA	NA	NA	AC005926.1
0	NA	NA	NA	NA	NA	AC005943.1
0	NA	NA	NA	NA	NA	AC005943.2
0	NA	NA	NA	NA	NA	AC005944.1
0	NA	NA	NA	NA	NA	AC005951.1
1.445	-0.0353867	0.0368437	-1.00139	0.316636	NA	AC005954.1
0.337687	-0.00023414	0.0173228	-0.0135163	0.989216	NA	AC005954.2
0.985999	-0.0126067	0.0278565	-0.461548	0.644405	NA	AC005962.1
0	NA	NA	NA	NA	NA	AC005972.1
0.167982	0.00343096	0.015334	0.223749	0.822953	NA	AC005972.2
0.489093	0.0193824	0.0212335	0.842427	0.399549	NA	AC005972.3
1.50061	0.00610918	0.0386269	0.158956	0.873703	NA	AC005993.1
0	NA	NA	NA	NA	NA	AC005996.1
0	NA	NA	NA	NA	NA	AC005999.1
0	NA	NA	NA	NA	NA	AC005999.2
0.133507	-0.00379755	0.015334	-0.247656	0.804401	NA	AC006001.1
8.10561	-0.0460021	0.0740709	-0.62009	0.535199	0.99957	AC006001.2
173.769	-0.139453	0.120713	-1.1551	0.248049	0.99957	AC006001.3
0	NA	NA	NA	NA	NA	AC006001.4
0	NA	NA	NA	NA	NA	AC006003.1
0	NA	NA	NA	NA	NA	AC006004.1
0	NA	NA	NA	NA	NA	AC006006.1
0	NA	NA	NA	NA	NA	AC006007.1
0	NA	NA	NA	NA	NA	AC006011.1
1.74364	0.00710376	0.039263	0.179758	0.857342	NA	AC006011.2
0.267013	-0.0074118	0.015334	-0.405973	0.684762	NA	AC006012.1
0	NA	NA	NA	NA	NA	AC006013.1
0.133507	-0.00379755	0.015334	-0.247656	0.804401	NA	AC006014.1
0	NA	NA	NA	NA	NA	AC006014.10
0	NA	NA	NA	NA	NA	AC006015.1
1.33396	0.0394169	0.0343262	1.34612	0.178265	NA	AC006017.1
0.133507	-0.00379755	0.015334	-0.247656	0.804401	NA	AC006019.1
0	NA	NA	NA	NA	NA	AC006019.2
0	NA	NA	NA	NA	NA	AC006019.3
2.96346	-0.001041	0.0484424	-0.0214963	0.98285	NA	AC006020.1
0	NA	NA	NA	NA	NA	AC006022.1
0	NA	NA	NA	NA	NA	AC006023.1
0.177118	-0.00379755	0.015334	-0.247656	0.804401	NA	AC006023.2
0.799691	0.00731418	0.0272803	0.268014	0.788689	NA	AC006026.1
0	NA	NA	NA	NA	NA	AC006026.2
0.40052	-0.0121371	0.0168399	-0.602186	0.547051	NA	AC006026.3
0	NA	NA	NA	NA	NA	AC006027.1
0	NA	NA	NA	NA	NA	AC006028.1
0.540327	-0.00804129	0.0216815	-0.37909	0.704621	NA	AC006030.1
0.167982	0.00343096	0.015334	0.223749	0.822953	NA	AC006033.1
1.05341	-0.00187154	0.0300834	-0.0630227	0.949748	NA	AC006033.2
0	NA	NA	NA	NA	NA	AC006035.1
0	NA	NA	NA	NA	NA	AC006037.1
0	NA	NA	NA	NA	NA	AC006041.1
6.37106	-0.019177	0.0692258	-0.276835	0.781907	NA	AC006042.1
0.936552	-0.00913048	0.0267271	-0.352468	0.724487	NA	AC006042.2
2.15602	0.049012	0.0442272	1.15953	0.246241	NA	AC006042.3
0.994945	-0.001087	0.0311342	-0.0349723	0.972102	NA	AC006042.4
0	NA	NA	NA	NA	NA	AC006043.1
0	NA	NA	NA	NA	NA	AC006055.1
129.586	0.0580696	0.124448	0.466108	0.641138	0.99957	AC006058.1
0.496506	0.0169612	0.0198239	0.788012	0.430689	NA	AC006058.2
2.01047	0.0225812	0.0420881	0.533109	0.593958	NA	AC006058.3
49.9548	-0.0464864	0.111329	-0.416722	0.676882	0.99957	AC006058.4
7.58244	0.00446799	0.0712799	0.0624515	0.950203	NA	AC006059.1
0.8944	0.00396049	0.0265408	0.152986	0.878409	NA	AC006059.2
0	NA	NA	NA	NA	NA	AC006059.3
0	NA	NA	NA	NA	NA	AC006063.1
0	NA	NA	NA	NA	NA	AC006063.2
0.855111	-0.00764728	0.0245627	-0.31036	0.756287	NA	AC006064.1
3.43442	0.0175888	0.0510407	0.345365	0.72982	NA	AC006064.2
2.47289	-0.0366354	0.0476666	-0.780819	0.434909	NA	AC006064.3
0	NA	NA	NA	NA	NA	AC006064.4
1.09377	0.00844447	0.0327708	0.255282	0.798505	NA	AC006064.5
0	NA	NA	NA	NA	NA	AC006064.6
0	NA	NA	NA	NA	NA	AC006065.1
0	NA	NA	NA	NA	NA	AC006065.2
0	NA	NA	NA	NA	NA	AC006065.3
0	NA	NA	NA	NA	NA	AC006065.4
0	NA	NA	NA	NA	NA	AC006065.5
0	NA	NA	NA	NA	NA	AC006065.6
0	NA	NA	NA	NA	NA	AC006076.1
0.160542	0.00343096	0.015334	0.223749	0.822953	NA	AC006077.1
4.31823	-0.0536179	0.0584681	-0.927868	0.353476	NA	AC006077.2
0	NA	NA	NA	NA	NA	AC006080.1
1.42059	0.0347225	0.0350832	1.02588	0.304947	NA	AC006111.1
7.89145	-0.00349191	0.0757065	-0.0461285	0.963208	0.99957	AC006111.2
0.301489	-0.000215469	0.0166208	-0.0129638	0.989657	NA	AC006111.3
0.133507	-0.00379755	0.015334	-0.247656	0.804401	NA	AC006115.1
0	NA	NA	NA	NA	NA	AC006115.2
0	NA	NA	NA	NA	NA	AC006115.3
2.4382	-0.0198225	0.046299	-0.429686	0.667424	NA	AC006116.1
3.87314	-0.052415	0.0577362	-0.922488	0.356274	NA	AC006116.10
0.267013	-0.0074118	0.015334	-0.405973	0.684762	NA	AC006116.2
0	NA	NA	NA	NA	NA	AC006116.3
3.14959	0.00554046	0.0538666	0.103062	0.917914	NA	AC006116.4
0.133507	-0.00379755	0.015334	-0.247656	0.804401	NA	AC006116.5
0.817827	0.00642312	0.0274436	0.235543	0.813787	NA	AC006116.6
0	NA	NA	NA	NA	NA	AC006116.7
0.691897	-0.0123769	0.022395	-0.570218	0.56853	NA	AC006116.8
1.50803	0.00632224	0.0386645	0.164514	0.869326	NA	AC006116.9
1.56324	0.0159991	0.0378623	0.419868	0.674582	NA	AC006122.1
22.2454	-0.13852	0.0975323	-1.42609	0.153843	0.967548	AC006128.1
0.133507	-0.00379755	0.015334	-0.247656	0.804401	NA	AC006130.1
0	NA	NA	NA	NA	NA	AC006130.2
0	NA	NA	NA	NA	NA	AC006133.1
13.6712	0.17261	0.0830211	2.16023	0.0307546	0.588715	AC006141.1
0	NA	NA	NA	NA	NA	AC006144.1
0.681064	0.0110439	0.0222736	0.524031	0.600257	NA	AC006145.1
0	NA	NA	NA	NA	NA	AC006146.1
0.379785	-0.0101877	0.0179649	-0.600084	0.54845	NA	AC006148.1
0	NA	NA	NA	NA	NA	AC006148.2
0	NA	NA	NA	NA	NA	AC006150.1
0	NA	NA	NA	NA	NA	AC006150.2
0	NA	NA	NA	NA	NA	AC006153.1
0	NA	NA	NA	NA	NA	AC006157.1
0	NA	NA	NA	NA	NA	AC006158.1
0	NA	NA	NA	NA	NA	AC006159.1
0	NA	NA	NA	NA	NA	AC006159.2
1.10293	-0.00619751	0.0312778	-0.196995	0.843832	NA	AC006160.1
0	NA	NA	NA	NA	NA	AC006160.2
0.582452	-0.0201229	0.0208175	-0.917287	0.358992	NA	AC006195.1
0	NA	NA	NA	NA	NA	AC006197.1
0.133507	-0.00379755	0.015334	-0.247656	0.804401	NA	AC006199.1
0	NA	NA	NA	NA	NA	AC006205.1
0	NA	NA	NA	NA	NA	AC006205.2
0.987269	0.0235286	0.0279898	0.938271	0.348105	NA	AC006206.1
1.90857	-0.0135775	0.0429911	-0.314849	0.752877	NA	AC006206.2
0	NA	NA	NA	NA	NA	AC006207.1
0	NA	NA	NA	NA	NA	AC006210.1
2.76901	0.00510651	0.0413845	0.124718	0.900746	NA	AC006210.2
3.2939	-0.0288782	0.0528242	-0.549621	0.58258	NA	AC006213.1
8.98846	-0.0690688	0.0789413	-0.87588	0.381095	0.99957	AC006213.2
3.45414	-0.0548309	0.0515916	-1.09538	0.27335	NA	AC006213.3
6.06751	0.0481952	0.0655647	0.735711	0.461907	NA	AC006213.4
0.807131	0.00752307	0.0273546	0.275415	0.782997	NA	AC006213.5
8.61346	0.126027	0.0778565	1.64526	0.0999169	0.901542	AC006213.6
0	NA	NA	NA	NA	NA	AC006236.1
0.328524	0.00879972	0.0171292	0.504965	0.613583	NA	AC006237.1
0	NA	NA	NA	NA	NA	AC006238.1
0.160542	0.00343096	0.015334	0.223749	0.822953	NA	AC006238.2
0.167982	0.00343096	0.015334	0.223749	0.822953	NA	AC006249.1
3.64911	-0.0322301	0.0566558	-0.568521	0.569682	NA	AC006252.1
10.789	0.00317555	0.0857451	0.0372145	0.970314	0.99957	AC006254.1
1.98224	0.0267213	0.0426638	0.638086	0.523418	NA	AC006254.2
0.523778	0.00592091	0.0215753	0.291005	0.771048	NA	AC006254.3
0	NA	NA	NA	NA	NA	AC006262.1
0.160569	0.00343096	0.015334	0.223749	0.822953	NA	AC006262.2
0	NA	NA	NA	NA	NA	AC006262.3
0	NA	NA	NA	NA	NA	AC006270.1
0	NA	NA	NA	NA	NA	AC006270.2
0	NA	NA	NA	NA	NA	AC006270.3
0.321084	0.00717869	0.015478	0.447411	0.654578	NA	AC006272.1
0	NA	NA	NA	NA	NA	AC006272.2
0.897262	-0.0224552	0.0271519	-0.891748	0.372528	NA	AC006273.1
12.1268	-0.0355928	0.0894882	-0.399424	0.68958	0.99957	AC006277.1
0	NA	NA	NA	NA	NA	AC006288.1
0	NA	NA	NA	NA	NA	AC006296.1
0	NA	NA	NA	NA	NA	AC006296.2
0	NA	NA	NA	NA	NA	AC006299.1
11.7382	-0.0155895	0.0897415	-0.173021	0.862635	0.99957	AC006305.1
0	NA	NA	NA	NA	NA	AC006305.2
0	NA	NA	NA	NA	NA	AC006305.3
0	NA	NA	NA	NA	NA	AC006322.1
0	NA	NA	NA	NA	NA	AC006326.1
0.133507	-0.00379755	0.015334	-0.247656	0.804401	NA	AC006328.1
0	NA	NA	NA	NA	NA	AC006328.2
321.091	-0.139557	0.118751	-1.17564	0.239737	0.99957	AC006329.1
0.859952	-0.00860661	0.0278607	-0.313517	0.753888	NA	AC006329.2
5.40807	-0.00549859	0.0660221	-0.083744	0.93326	NA	AC006330.1
0	NA	NA	NA	NA	NA	AC006333.1
44.2969	-0.222367	0.12145	-1.83483	0.0665312	0.793856	AC006333.2
0	NA	NA	NA	NA	NA	AC006335.1
0	NA	NA	NA	NA	NA	AC006335.2
0	NA	NA	NA	NA	NA	AC006335.3
0	NA	NA	NA	NA	NA	AC006338.1
0	NA	NA	NA	NA	NA	AC006338.2
0	NA	NA	NA	NA	NA	AC006349.1
0	NA	NA	NA	NA	NA	AC006355.1
0	NA	NA	NA	NA	NA	AC006355.2
0	NA	NA	NA	NA	NA	AC006357.1
0	NA	NA	NA	NA	NA	AC006362.1
0	NA	NA	NA	NA	NA	AC006363.1
0	NA	NA	NA	NA	NA	AC006366.1
0	NA	NA	NA	NA	NA	AC006369.1
0	NA	NA	NA	NA	NA	AC006369.2
0	NA	NA	NA	NA	NA	AC006371.1
0.294049	-0.000211512	0.0164681	-0.0128437	0.989752	NA	AC006372.1
0.565876	-0.00718224	0.0204443	-0.384054	0.700939	NA	AC006372.2
0.328551	0.00880019	0.0171297	0.505008	0.613553	NA	AC006372.3
0	NA	NA	NA	NA	NA	AC006377.1
1.39549	-0.0194242	0.0359079	-0.544153	0.586336	NA	AC006378.1
0	NA	NA	NA	NA	NA	AC006380.1
0	NA	NA	NA	NA	NA	AC006386.1
0	NA	NA	NA	NA	NA	AC006386.2
1.70879	0.0381279	0.0377875	1.08408	0.278328	NA	AC006387.1
0	NA	NA	NA	NA	NA	AC006390.1
0	NA	NA	NA	NA	NA	AC006427.1
0	NA	NA	NA	NA	NA	AC006432.1
0	NA	NA	NA	NA	NA	AC006435.1
18.8881	0.0789573	0.0922787	0.854709	0.392713	0.99957	AC006435.2
0	NA	NA	NA	NA	NA	AC006435.3
0	NA	NA	NA	NA	NA	AC006435.4
0	NA	NA	NA	NA	NA	AC006435.5
1.92791	0.0246382	0.0388814	0.64269	0.520425	NA	AC006441.1
0	NA	NA	NA	NA	NA	AC006441.2
0	NA	NA	NA	NA	NA	AC006441.3
0	NA	NA	NA	NA	NA	AC006441.4
0	NA	NA	NA	NA	NA	AC006441.5
0	NA	NA	NA	NA	NA	AC006445.1
0.573316	-0.00703977	0.0205564	-0.385555	0.699826	NA	AC006445.2
0	NA	NA	NA	NA	NA	AC006449.1
0.454591	0.0055959	0.0190977	0.256741	0.797379	NA	AC006449.2
0	NA	NA	NA	NA	NA	AC006449.3
4.80921	0.0117244	0.0594111	0.196554	0.844177	NA	AC006449.5
0.505642	0.0059417	0.0213525	0.296208	0.767071	NA	AC006449.6
0	NA	NA	NA	NA	NA	AC006449.7
0	NA	NA	NA	NA	NA	AC006450.1
0	NA	NA	NA	NA	NA	AC006450.2
0	NA	NA	NA	NA	NA	AC006450.3
0.940847	-0.0272983	0.0296038	-0.997736	0.318407	NA	AC006452.1
0	NA	NA	NA	NA	NA	AC006453.1
1.37587	-0.032257	0.0357022	-0.937337	0.348585	NA	AC006453.2
0	NA	NA	NA	NA	NA	AC006453.3
0	NA	NA	NA	NA	NA	AC006453.4
0	NA	NA	NA	NA	NA	AC006455.1
0	NA	NA	NA	NA	NA	AC006455.2
0	NA	NA	NA	NA	NA	AC006455.3
0	NA	NA	NA	NA	NA	AC006455.4
0	NA	NA	NA	NA	NA	AC006455.5
0	NA	NA	NA	NA	NA	AC006455.6
0	NA	NA	NA	NA	NA	AC006455.7
0	NA	NA	NA	NA	NA	AC006455.8
0	NA	NA	NA	NA	NA	AC006457.1
0	NA	NA	NA	NA	NA	AC006458.1
0.615133	0.0115568	0.021377	0.488486	0.625206	NA	AC006460.1
0	NA	NA	NA	NA	NA	AC006461.1
0	NA	NA	NA	NA	NA	AC006463.1
0	NA	NA	NA	NA	NA	AC006466.1
0	NA	NA	NA	NA	NA	AC006480.1
3.29363	-0.0545007	0.0518841	-1.07184	0.28379	NA	AC006480.2
0	NA	NA	NA	NA	NA	AC006482.1
0.708309	-0.00161428	0.0256451	-0.0639265	0.949029	NA	AC006483.1
0.40052	-0.0121371	0.0168399	-0.602186	0.547051	NA	AC006483.2
0	NA	NA	NA	NA	NA	AC006484.1
0	NA	NA	NA	NA	NA	AC006486.1
0	NA	NA	NA	NA	NA	AC006486.2
0.489066	0.0166875	0.019718	0.777819	0.436676	NA	AC006487.1
0.160542	0.00343096	0.015334	0.223749	0.822953	NA	AC006487.2
0	NA	NA	NA	NA	NA	AC006499.1
0	NA	NA	NA	NA	NA	AC006499.2
0	NA	NA	NA	NA	NA	AC006499.3
0	NA	NA	NA	NA	NA	AC006499.4
0	NA	NA	NA	NA	NA	AC006499.5
0	NA	NA	NA	NA	NA	AC006499.6
0	NA	NA	NA	NA	NA	AC006499.7
0	NA	NA	NA	NA	NA	AC006499.8
6.72148	-0.0743123	0.0734985	-1.02133	0.307098	NA	AC006504.1
0	NA	NA	NA	NA	NA	AC006504.2
1.30408	-0.0299261	0.0353673	-0.875025	0.38156	NA	AC006504.3
0	NA	NA	NA	NA	NA	AC006504.4
44.8578	-0.0142362	0.122002	-0.116725	0.907078	0.99957	AC006504.5
0	NA	NA	NA	NA	NA	AC006504.6
0	NA	NA	NA	NA	NA	AC006504.7
11.9338	0.00269538	0.0891009	0.0302122	0.975898	0.99957	AC006504.8
1.62647	0.028385	0.039001	0.743389	0.457246	NA	AC006509.1
0.133507	-0.00379755	0.015334	-0.247656	0.804401	NA	AC006509.2
0	NA	NA	NA	NA	NA	AC006511.1
1.10865	0.00798115	0.030997	0.256076	0.797892	NA	AC006511.2
13.727	-0.00540359	0.0897246	-0.0605306	0.951733	0.99957	AC006511.3
1.18112	0.00403463	0.0293426	0.138795	0.889612	NA	AC006511.4
0.6047	-0.0119405	0.0230901	-0.515053	0.606516	NA	AC006511.5
0	NA	NA	NA	NA	NA	AC006512.1
0	NA	NA	NA	NA	NA	AC006512.2
0.167982	0.00343096	0.015334	0.223749	0.822953	NA	AC006517.1
0.379785	-0.0101877	0.0179649	-0.600084	0.54845	NA	AC006518.1
1.13586	-0.00733096	0.0330708	-0.221701	0.824547	NA	AC006518.2
0	NA	NA	NA	NA	NA	AC006529.1
0	NA	NA	NA	NA	NA	AC006530.1
0	NA	NA	NA	NA	NA	AC006534.1
0	NA	NA	NA	NA	NA	AC006534.2
7.30809	0.121618	0.0721774	1.71299	0.0867143	NA	AC006538.1
0	NA	NA	NA	NA	NA	AC006538.2
0.160542	0.00343096	0.015334	0.223749	0.822953	NA	AC006538.3
1.41032	-0.0189439	0.0359798	-0.531149	0.595316	NA	AC006539.1
3.67374	-0.0444423	0.0558624	-0.805305	0.420644	NA	AC006539.2
11.0109	0.14153	0.0849227	1.70396	0.088389	0.863386	AC006547.1
0	NA	NA	NA	NA	NA	AC006547.2
0	NA	NA	NA	NA	NA	AC006547.3
0	NA	NA	NA	NA	NA	AC006548.1
0	NA	NA	NA	NA	NA	AC006548.2
0.454591	0.0055959	0.0190977	0.256741	0.797379	NA	AC006548.3
13.6196	0.0444612	0.0892347	0.49883	0.617899	0.99957	AC006557.1
0	NA	NA	NA	NA	NA	AC006557.2
0	NA	NA	NA	NA	NA	AC006557.3
0	NA	NA	NA	NA	NA	AC006557.4
1.33984	0.0256365	0.0339253	0.791907	0.428415	NA	AC006557.5
0	NA	NA	NA	NA	NA	AC006557.6
0	NA	NA	NA	NA	NA	AC006566.1
0.160542	0.00343096	0.015334	0.223749	0.822953	NA	AC006581.1
13.205	-0.0295069	0.0930378	-0.317344	0.750983	0.99957	AC006581.2
0	NA	NA	NA	NA	NA	AC006600.1
0	NA	NA	NA	NA	NA	AC006600.2
0	NA	NA	NA	NA	NA	AC006840.1
0	NA	NA	NA	NA	NA	AC006924.1
0	NA	NA	NA	NA	NA	AC006926.1
0.48168	0.0164239	0.0196164	0.7678	0.442606	NA	AC006927.1
0	NA	NA	NA	NA	NA	AC006927.2
0	NA	NA	NA	NA	NA	AC006927.3
0	NA	NA	NA	NA	NA	AC006927.4
0	NA	NA	NA	NA	NA	AC006927.5
1.33105	-0.0134387	0.0328856	-0.413733	0.679069	NA	AC006942.1
1.00238	-0.000921254	0.0325413	-0.0284107	0.977335	NA	AC006946.1
0.160569	0.00343096	0.015334	0.223749	0.822953	NA	AC006946.2
0	NA	NA	NA	NA	NA	AC006946.3
0	NA	NA	NA	NA	NA	AC006947.1
0.294049	-0.000211512	0.0164681	-0.0128437	0.989752	NA	AC006953.1
0.202667	-0.00379755	0.015334	-0.247656	0.804401	NA	AC006960.1
0	NA	NA	NA	NA	NA	AC006960.2
0.379785	-0.0101877	0.0179649	-0.600084	0.54845	NA	AC006960.3
0.133507	-0.00379755	0.015334	-0.247656	0.804401	NA	AC006963.1
0.202667	-0.00379755	0.015334	-0.247656	0.804401	NA	AC006965.1
0	NA	NA	NA	NA	NA	AC006967.1
0	NA	NA	NA	NA	NA	AC006967.2
0	NA	NA	NA	NA	NA	AC006967.3
1.52444	0.0197742	0.037166	0.545953	0.585098	NA	AC006970.1
0.823707	-0.00603253	0.0259334	-0.234311	0.814744	NA	AC006970.2
0	NA	NA	NA	NA	NA	AC006970.3
4.85789	-0.0217702	0.0616705	-0.356718	0.721303	NA	AC006971.1
0	NA	NA	NA	NA	NA	AC006972.1
1.00236	-0.000867533	0.0311921	-0.027907	0.977736	NA	AC006974.1
0	NA	NA	NA	NA	NA	AC006974.2
76.6561	0.119061	0.122774	0.967858	0.333115	0.99957	AC006978.1
0	NA	NA	NA	NA	NA	AC006978.2
0	NA	NA	NA	NA	NA	AC006986.1
0	NA	NA	NA	NA	NA	AC006987.1
0	NA	NA	NA	NA	NA	AC006987.2
0	NA	NA	NA	NA	NA	AC006987.3
0	NA	NA	NA	NA	NA	AC006988.1
0	NA	NA	NA	NA	NA	AC006989.1
0.826753	0.020908	0.0279173	0.810786	0.417489	NA	AC006994.1
0.294049	-0.000211512	0.0164681	-0.0128437	0.989752	NA	AC006994.2
0	NA	NA	NA	NA	NA	AC006994.3
2.474	0.0345618	0.0468151	0.750884	0.452722	NA	AC007000.1
0.321084	0.00717869	0.015478	0.447411	0.654578	NA	AC007000.2
0.267013	-0.0074118	0.015334	-0.405973	0.684762	NA	AC007000.3
0.700923	-0.00169828	0.0240829	-0.0713758	0.943099	NA	AC007001.1
0	NA	NA	NA	NA	NA	AC007003.1
0	NA	NA	NA	NA	NA	AC007009.1
0.133507	-0.00379755	0.015334	-0.247656	0.804401	NA	AC007009.2
0	NA	NA	NA	NA	NA	AC007012.1
0	NA	NA	NA	NA	NA	AC007012.2
0.133507	-0.00379755	0.015334	-0.247656	0.804401	NA	AC007014.1
0	NA	NA	NA	NA	NA	AC007014.2
0.177118	-0.00379755	0.015334	-0.247656	0.804401	NA	AC007016.1
0	NA	NA	NA	NA	NA	AC007025.1
0.177118	-0.00379755	0.015334	-0.247656	0.804401	NA	AC007029.1
0	NA	NA	NA	NA	NA	AC007032.1
0	NA	NA	NA	NA	NA	AC007036.1
0.489093	0.0193824	0.0212335	0.842427	0.399549	NA	AC007036.2
0	NA	NA	NA	NA	NA	AC007036.3
3.98828	-0.017057	0.0557082	-0.305074	0.76031	NA	AC007038.1
11.8299	-0.0233478	0.0859254	-0.271828	0.785755	0.99957	AC007038.2
0.6226	0.0153994	0.0247083	0.573613	0.56623	NA	AC007040.1
0	NA	NA	NA	NA	NA	AC007040.2
0	NA	NA	NA	NA	NA	AC007040.3
1.82323	0.027315	0.0371684	0.766551	0.443349	NA	AC007041.1
0	NA	NA	NA	NA	NA	AC007050.1
0	NA	NA	NA	NA	NA	AC007056.1
0	NA	NA	NA	NA	NA	AC007064.1
0	NA	NA	NA	NA	NA	AC007064.2
0	NA	NA	NA	NA	NA	AC007064.3
0	NA	NA	NA	NA	NA	AC007064.4
0.595537	0.0016532	0.0228223	0.0658864	0.947468	NA	AC007066.1
59.3569	-0.0465224	0.124364	-0.373845	0.70852	0.99957	AC007066.2
0	NA	NA	NA	NA	NA	AC007068.1
0	NA	NA	NA	NA	NA	AC007068.2
0.496506	0.0169612	0.0198239	0.788012	0.430689	NA	AC007091.1
0	NA	NA	NA	NA	NA	AC007092.1
0.160569	0.00343096	0.015334	0.223749	0.822953	NA	AC007096.1
17.3252	0.0403288	0.101458	0.397232	0.691196	0.99957	AC007098.1
0.321084	0.00717869	0.015478	0.447411	0.654578	NA	AC007098.2
0	NA	NA	NA	NA	NA	AC007099.1
0	NA	NA	NA	NA	NA	AC007099.2
0	NA	NA	NA	NA	NA	AC007100.1
0	NA	NA	NA	NA	NA	AC007106.1
2.5617	-0.02542	0.0482823	-0.532932	0.594081	NA	AC007114.1
2.36026	0.0287481	0.0416493	0.698025	0.485161	NA	AC007114.2
0	NA	NA	NA	NA	NA	AC007115.1
0	NA	NA	NA	NA	NA	AC007126.1
9.75632	-0.0886206	0.0835701	-1.06203	0.288221	0.99957	AC007128.1
1.86994	-0.037592	0.0408933	-0.952629	0.340778	NA	AC007128.2
0	NA	NA	NA	NA	NA	AC007131.3
0	NA	NA	NA	NA	NA	AC007132.1
0	NA	NA	NA	NA	NA	AC007136.1
0	NA	NA	NA	NA	NA	AC007151.1
0	NA	NA	NA	NA	NA	AC007159.1
0.202667	-0.00379755	0.015334	-0.247656	0.804401	NA	AC007160.1
0.160569	0.00343096	0.015334	0.223749	0.822953	NA	AC007161.1
0	NA	NA	NA	NA	NA	AC007161.2
0	NA	NA	NA	NA	NA	AC007161.3
0.202667	-0.00379755	0.015334	-0.247656	0.804401	NA	AC007163.1
0	NA	NA	NA	NA	NA	AC007179.1
0.496533	0.016962	0.0198242	0.788045	0.43067	NA	AC007179.2
0	NA	NA	NA	NA	NA	AC007179.3
0	NA	NA	NA	NA	NA	AC007182.1
27.6256	0.0304065	0.112599	0.270331	0.786906	0.99957	AC007182.2
94.2323	-0.113573	0.125129	-0.906192	0.364834	0.99957	AC007191.1
0	NA	NA	NA	NA	NA	AC007192.1
0	NA	NA	NA	NA	NA	AC007192.2
0	NA	NA	NA	NA	NA	AC007193.1
2.88496	0.036569	0.0464579	0.797987	0.424878	NA	AC007193.2
0	NA	NA	NA	NA	NA	AC007193.3
8.3547	0.0583895	0.0788553	0.746638	0.455282	0.99957	AC007204.1
0	NA	NA	NA	NA	NA	AC007207.1
1.6745	-0.000873246	0.0386743	-0.0226701	0.981913	NA	AC007207.2
0	NA	NA	NA	NA	NA	AC007215.1
0.167982	0.00343096	0.015334	0.223749	0.822953	NA	AC007216.1
0.160542	0.00343096	0.015334	0.223749	0.822953	NA	AC007216.2
6.26195	0.0354216	0.0705594	0.503957	0.614291	NA	AC007216.3
1.77665	0.00655281	0.0391766	0.166933	0.867422	NA	AC007216.4
0	NA	NA	NA	NA	NA	AC007216.5
24.7251	0.0408577	0.109476	0.372998	0.70915	0.99957	AC007218.1
0.160542	0.00343096	0.015334	0.223749	0.822953	NA	AC007218.2
0	NA	NA	NA	NA	NA	AC007220.1
0	NA	NA	NA	NA	NA	AC007221.1
0	NA	NA	NA	NA	NA	AC007221.2
0	NA	NA	NA	NA	NA	AC007223.1
0	NA	NA	NA	NA	NA	AC007224.1
0.202667	-0.00379755	0.015334	-0.247656	0.804401	NA	AC007224.2
1.77811	0.0220527	0.0415941	0.53383	0.593459	NA	AC007225.1
0	NA	NA	NA	NA	NA	AC007225.2
6.33262	0.0447755	0.0696826	0.648412	0.516719	NA	AC007228.1
32.8549	0.0458054	0.116213	0.394457	0.693243	0.99957	AC007229.1
0	NA	NA	NA	NA	NA	AC007237.1
13.6838	-0.0356374	0.0946183	-0.376872	0.706269	0.99957	AC007238.1
6.57937	0.0219383	0.0723891	0.301719	0.762866	NA	AC007240.1
1.95369	-0.000569969	0.0425485	-0.0133684	0.989334	NA	AC007240.2
0	NA	NA	NA	NA	NA	AC007241.1
0	NA	NA	NA	NA	NA	AC007242.1
0.708309	-0.00161428	0.0256451	-0.0639265	0.949029	NA	AC007249.1
7.69638	-0.0996962	0.0762995	-1.31756	0.187652	NA	AC007249.2
1.29649	-7.67508e-05	0.0346193	-0.00221017	0.998237	NA	AC007250.1
0	NA	NA	NA	NA	NA	AC007253.1
6.27273	0.00679425	0.0665624	0.102178	0.918616	NA	AC007255.1
0	NA	NA	NA	NA	NA	AC007255.2
2.84537	0.0354242	0.0449862	0.816344	0.414303	NA	AC007256.1
0	NA	NA	NA	NA	NA	AC007262.1
0.522218	-0.00670844	0.0200536	-0.325278	0.744971	NA	AC007262.2
0.925812	0.000937157	0.0290597	0.0317995	0.974632	NA	AC007272.1
0	NA	NA	NA	NA	NA	AC007274.1
0	NA	NA	NA	NA	NA	AC007274.2
0	NA	NA	NA	NA	NA	AC007274.3
0	NA	NA	NA	NA	NA	AC007275.1
0.826753	0.020908	0.0279173	0.810786	0.417489	NA	AC007277.1
0	NA	NA	NA	NA	NA	AC007278.1
0	NA	NA	NA	NA	NA	AC007278.2
0.940637	0.00135472	0.029186	0.045922	0.963372	NA	AC007279.1
0	NA	NA	NA	NA	NA	AC007283.1
0.160569	0.00343096	0.015334	0.223749	0.822953	NA	AC007283.2
2.08815	0.00528668	0.0387582	0.133852	0.89352	NA	AC007285.1
1.91015	-0.00787797	0.0373684	-0.21339	0.831023	NA	AC007285.2
5.82387	0.00514628	0.0676515	0.0767339	0.938835	NA	AC007292.1
3.32654	0.0270895	0.0550607	0.49612	0.61981	NA	AC007292.2
0	NA	NA	NA	NA	NA	AC007292.3
0	NA	NA	NA	NA	NA	AC007298.1
0.301489	-0.000215469	0.0166208	-0.0129638	0.989657	NA	AC007298.2
0	NA	NA	NA	NA	NA	AC007308.1
1.58132	0.013399	0.0356622	0.375379	0.707379	NA	AC007308.6
1.53533	-0.00964139	0.0369717	-0.263035	0.792524	NA	AC007312.1
0.505642	0.0059417	0.0213525	0.296208	0.767071	NA	AC007314.1
171.337	-0.201717	0.122155	-1.65091	0.0987564	0.897542	AC007318.1
17.366	-0.0139593	0.102282	-0.136602	0.891346	0.99957	AC007318.2
9.00255	-0.0958505	0.0778846	-1.24911	0.211625	0.99957	AC007319.1
0	NA	NA	NA	NA	NA	AC007322.1
0	NA	NA	NA	NA	NA	AC007322.2
0	NA	NA	NA	NA	NA	AC007322.3
0	NA	NA	NA	NA	NA	AC007322.4
0.681064	0.0110439	0.0222736	0.524031	0.600257	NA	AC007326.1
0.958747	0.000482203	0.029339	0.0163402	0.986963	NA	AC007326.2
1.04448	-0.0170445	0.0317503	-0.551046	0.581602	NA	AC007326.3
0	NA	NA	NA	NA	NA	AC007326.4
6.40759	-0.103425	0.0641816	-1.67265	0.0943963	NA	AC007326.5
0	NA	NA	NA	NA	NA	AC007327.1
0	NA	NA	NA	NA	NA	AC007327.2
0.133507	-0.00379755	0.015334	-0.247656	0.804401	NA	AC007333.1
0	NA	NA	NA	NA	NA	AC007333.2
2.40357	-0.00526973	0.0463965	-0.113061	0.909982	NA	AC007336.1
0	NA	NA	NA	NA	NA	AC007336.2
0.177118	-0.00379755	0.015334	-0.247656	0.804401	NA	AC007336.3
0	NA	NA	NA	NA	NA	AC007339.1
0.160569	0.00343096	0.015334	0.223749	0.822953	NA	AC007342.1
0	NA	NA	NA	NA	NA	AC007342.2
1.96416	0.0265751	0.041777	0.646423	0.518005	NA	AC007342.3
0	NA	NA	NA	NA	NA	AC007342.4
0.160569	0.00343096	0.015334	0.223749	0.822953	NA	AC007342.5
1.71967	0.0108458	0.0385059	0.286597	0.774421	NA	AC007342.6
11.5847	0.0267411	0.0879464	0.302898	0.761967	0.99957	AC007342.7
0	NA	NA	NA	NA	NA	AC007342.8
0	NA	NA	NA	NA	NA	AC007342.9
0.699409	-0.0145307	0.0242524	-0.619848	0.535358	NA	AC007344.1
0	NA	NA	NA	NA	NA	AC007346.1
0	NA	NA	NA	NA	NA	AC007346.2
0.657102	0.0232401	0.0223966	1.02717	0.304341	NA	AC007347.1
0	NA	NA	NA	NA	NA	AC007349.1
0	NA	NA	NA	NA	NA	AC007349.2
0	NA	NA	NA	NA	NA	AC007349.3
0	NA	NA	NA	NA	NA	AC007349.4
0	NA	NA	NA	NA	NA	AC007353.1
0	NA	NA	NA	NA	NA	AC007358.1
0	NA	NA	NA	NA	NA	AC007359.1
0.267013	-0.0074118	0.015334	-0.405973	0.684762	NA	AC007362.1
0	NA	NA	NA	NA	NA	AC007363.1
0.3451	-0.000237851	0.0174589	-0.0136235	0.98913	NA	AC007364.1
0.797994	0.0197438	0.0256838	0.761067	0.446617	NA	AC007365.1
0	NA	NA	NA	NA	NA	AC007365.2
3.3569	-0.0573387	0.0535872	-1.09796	0.27222	NA	AC007368.1
0	NA	NA	NA	NA	NA	AC007368.2
0	NA	NA	NA	NA	NA	AC007370.1
0.503946	0.0144044	0.0182269	0.726123	0.467763	NA	AC007370.2
0	NA	NA	NA	NA	NA	AC007375.1
12.7019	0.0368313	0.0925646	0.398442	0.690304	0.99957	AC007375.2
0	NA	NA	NA	NA	NA	AC007376.1
0.177118	-0.00379755	0.015334	-0.247656	0.804401	NA	AC007376.2
0	NA	NA	NA	NA	NA	AC007377.1
0	NA	NA	NA	NA	NA	AC007378.1
21.9519	0.0564492	0.102571	0.550486	0.581986	0.99957	AC007382.1
0	NA	NA	NA	NA	NA	AC007383.1
36.0647	0.0644693	0.118897	0.542095	0.587753	0.99957	AC007383.2
0	NA	NA	NA	NA	NA	AC007383.3
0	NA	NA	NA	NA	NA	AC007384.1
2.38415	-0.0417774	0.0440057	-0.979444	0.327361	NA	AC007386.1
0.160569	0.00343096	0.015334	0.223749	0.822953	NA	AC007386.4
0.454618	0.00649125	0.020603	0.278065	0.780963	NA	AC007387.1
13.1541	-0.0509096	0.0918154	-0.554781	0.579044	0.99957	AC007388.1
1.19592	0.00585454	0.0334578	0.1772	0.859352	NA	AC007389.1
0.167982	0.00343096	0.015334	0.223749	0.822953	NA	AC007389.2
0	NA	NA	NA	NA	NA	AC007389.3
0	NA	NA	NA	NA	NA	AC007389.4
4.45923	0.0280229	0.0601192	0.464344	0.642402	NA	AC007389.5
0.721658	-0.00333191	0.0229865	-0.142562	0.886636	NA	AC007390.1
27.9724	-0.0654287	0.113277	-0.577305	0.563733	0.99957	AC007390.2
0.294076	-0.000211527	0.0164687	-0.0128442	0.989752	NA	AC007391.1
0	NA	NA	NA	NA	NA	AC007394.1
0	NA	NA	NA	NA	NA	AC007395.1
0.177118	-0.00379755	0.015334	-0.247656	0.804401	NA	AC007402.1
0	NA	NA	NA	NA	NA	AC007403.1
2.4655	-0.034535	0.0461714	-0.76033	0.447057	NA	AC007405.1
0	NA	NA	NA	NA	NA	AC007405.2
23.0702	-0.0627651	0.105355	-0.596641	0.550747	0.99957	AC007405.3
0	NA	NA	NA	NA	NA	AC007406.1
0	NA	NA	NA	NA	NA	AC007406.2
1.6387	-0.0561315	0.0383672	-1.68601	0.0917932	NA	AC007406.3
0.916649	0.015321	0.0291593	0.522715	0.601172	NA	AC007406.4
46.504	0.122361	0.118719	1.03156	0.302279	0.99957	AC007406.5
0	NA	NA	NA	NA	NA	AC007421.1
0	NA	NA	NA	NA	NA	AC007422.1
0	NA	NA	NA	NA	NA	AC007422.2
0	NA	NA	NA	NA	NA	AC007423.1
0.994972	-0.0010862	0.0311344	-0.0349465	0.972122	NA	AC007424.1
0.664515	0.0230593	0.0223094	1.02715	0.304349	NA	AC007431.1
0	NA	NA	NA	NA	NA	AC007431.2
0	NA	NA	NA	NA	NA	AC007431.3
0	NA	NA	NA	NA	NA	AC007435.1
0	NA	NA	NA	NA	NA	AC007436.1
0	NA	NA	NA	NA	NA	AC007448.1
0	NA	NA	NA	NA	NA	AC007448.2
4.10144	-0.0595139	0.0583798	-1.04135	0.297711	NA	AC007448.3
5.79204	-0.0093401	0.0682646	-0.13702	0.891015	NA	AC007448.4
0	NA	NA	NA	NA	NA	AC007450.1
0	NA	NA	NA	NA	NA	AC007450.2
0	NA	NA	NA	NA	NA	AC007450.3
0	NA	NA	NA	NA	NA	AC007450.4
0	NA	NA	NA	NA	NA	AC007458.1
0	NA	NA	NA	NA	NA	AC007461.1
3.88491	0.0160324	0.0569439	0.283846	0.776528	NA	AC007463.1
0.133507	-0.00379755	0.015334	-0.247656	0.804401	NA	AC007485.1
81.9098	0.0341379	0.123417	0.277107	0.781698	0.99957	AC007485.2
0	NA	NA	NA	NA	NA	AC007486.1
7.80741	-0.011446	0.0780108	-0.146988	0.883142	0.99957	AC007490.1
0.321111	0.00866798	0.0170011	0.493117	0.62193	NA	AC007491.1
0.177118	-0.00379755	0.015334	-0.247656	0.804401	NA	AC007493.1
0	NA	NA	NA	NA	NA	AC007493.2
0.310625	-0.00893978	0.016834	-0.490926	0.623479	NA	AC007494.1
0.462057	0.00660076	0.0206918	0.287905	0.77342	NA	AC007494.2
0.622573	0.013669	0.0232242	0.538236	0.590414	NA	AC007494.3
4.12472	0.0189245	0.0588886	0.322312	0.747216	NA	AC007495.1
0	NA	NA	NA	NA	NA	AC007495.2
0.496506	0.0169612	0.0198239	0.788012	0.430689	NA	AC007496.1
0.301489	-0.000215469	0.0166208	-0.0129638	0.989657	NA	AC007496.2
0	NA	NA	NA	NA	NA	AC007496.3
2.98317	0.0122054	0.0524609	0.233535	0.815346	NA	AC007497.1
0	NA	NA	NA	NA	NA	AC007513.1
0	NA	NA	NA	NA	NA	AC007527.1
0	NA	NA	NA	NA	NA	AC007527.2
0	NA	NA	NA	NA	NA	AC007528.1
0	NA	NA	NA	NA	NA	AC007529.1
0.160569	0.00343096	0.015334	0.223749	0.822953	NA	AC007529.2
2.14832	0.0728843	0.0426838	2.0053	0.0449309	NA	AC007533.1
0	NA	NA	NA	NA	NA	AC007535.1
0.133507	-0.00379755	0.015334	-0.247656	0.804401	NA	AC007536.1
113.869	-0.125668	0.125306	-1.00246	0.316121	0.99957	AC007537.1
0.336174	-0.0094226	0.0172805	-0.531082	0.595362	NA	AC007537.2
0.531191	0.00612788	0.021669	0.300741	0.763612	NA	AC007540.1
2.06925	-0.0315005	0.0417925	-0.767287	0.442911	NA	AC007541.1
0.160569	0.00343096	0.015334	0.223749	0.822953	NA	AC007546.1
0	NA	NA	NA	NA	NA	AC007546.2
0.321138	0.00717955	0.0154789	0.447492	0.65452	NA	AC007547.1
0	NA	NA	NA	NA	NA	AC007547.2
0	NA	NA	NA	NA	NA	AC007551.1
0.294076	-0.000211527	0.0164687	-0.0128442	0.989752	NA	AC007552.1
2.08871	0.00725491	0.0443699	0.162798	0.870677	NA	AC007552.2
0	NA	NA	NA	NA	NA	AC007556.1
0	NA	NA	NA	NA	NA	AC007557.1
0	NA	NA	NA	NA	NA	AC007557.2
0	NA	NA	NA	NA	NA	AC007557.3
0	NA	NA	NA	NA	NA	AC007557.4
0	NA	NA	NA	NA	NA	AC007559.1
4.77325	-0.0112158	0.0610579	-0.182619	0.855097	NA	AC007560.1
0	NA	NA	NA	NA	NA	AC007560.2
0.471167	-0.00658258	0.0208857	-0.28881	0.772727	NA	AC007562.1
0.133507	-0.00379755	0.015334	-0.247656	0.804401	NA	AC007563.1
0	NA	NA	NA	NA	NA	AC007563.2
0.160569	0.00343096	0.015334	0.223749	0.822953	NA	AC007563.3
3.19449	-0.0399873	0.0532343	-0.756441	0.449385	NA	AC007566.1
0	NA	NA	NA	NA	NA	AC007566.2
0	NA	NA	NA	NA	NA	AC007567.1
0	NA	NA	NA	NA	NA	AC007568.1
0	NA	NA	NA	NA	NA	AC007569.1
0.405334	-0.00890361	0.0168001	-0.583931	0.559267	NA	AC007570.1
0	NA	NA	NA	NA	NA	AC007595.1
0	NA	NA	NA	NA	NA	AC007598.1
0	NA	NA	NA	NA	NA	AC007598.2
0	NA	NA	NA	NA	NA	AC007598.3
0	NA	NA	NA	NA	NA	AC007599.1
0.202667	-0.00379755	0.015334	-0.247656	0.804401	NA	AC007599.2
0.639176	0.000408156	0.0248737	0.0162985	0.986996	NA	AC007601.1
0	NA	NA	NA	NA	NA	AC007601.2
0	NA	NA	NA	NA	NA	AC007603.1
0	NA	NA	NA	NA	NA	AC007603.2
0	NA	NA	NA	NA	NA	AC007603.3
0.133507	-0.00379755	0.015334	-0.247656	0.804401	NA	AC007608.1
0	NA	NA	NA	NA	NA	AC007608.2
0.3451	-0.000237851	0.0174589	-0.0136235	0.98913	NA	AC007608.3
0.496716	-0.00676122	0.0211635	-0.320835	0.748335	NA	AC007608.4
0	NA	NA	NA	NA	NA	AC007610.1
1.47204	-0.021709	0.0369577	-0.596589	0.550782	NA	AC007610.2
0.160542	0.00343096	0.015334	0.223749	0.822953	NA	AC007610.3
5.14503	-0.109332	0.0624169	-1.82595	0.0678578	NA	AC007610.4
3.01113	0.0368716	0.0515932	0.715145	0.47452	NA	AC007611.1
1.32196	-0.000449864	0.0331843	-0.01356	0.989181	NA	AC007613.1
5.51063	0.0635603	0.0648883	0.988164	0.323072	NA	AC007614.1
0	NA	NA	NA	NA	NA	AC007614.2
0	NA	NA	NA	NA	NA	AC007618.1
0.960287	0.0153783	0.0310544	0.499711	0.617279	NA	AC007619.1
0	NA	NA	NA	NA	NA	AC007619.2
0	NA	NA	NA	NA	NA	AC007620.1
0	NA	NA	NA	NA	NA	AC007620.2
0.167982	0.00343096	0.015334	0.223749	0.822953	NA	AC007620.3
1.78701	0.0348173	0.040449	0.885513	0.37588	NA	AC007621.1
0.792278	0.00710569	0.0272056	0.260613	0.794391	NA	AC007622.1
10.8517	-0.0780838	0.086886	-0.899676	0.368293	0.99957	AC007622.2
0	NA	NA	NA	NA	NA	AC007631.1
0.462057	0.00660076	0.0206918	0.287905	0.77342	NA	AC007637.1
0	NA	NA	NA	NA	NA	AC007638.1
0	NA	NA	NA	NA	NA	AC007638.2
0	NA	NA	NA	NA	NA	AC007639.1
0	NA	NA	NA	NA	NA	AC007652.1
0	NA	NA	NA	NA	NA	AC007655.1
0.763546	0.0079756	0.0253208	0.308109	0.757999	NA	AC007656.1
0.167982	0.00343096	0.015334	0.223749	0.822953	NA	AC007656.2
13.3046	-0.00215423	0.0900982	-0.0238034	0.981009	0.99957	AC007663.1
0.363236	-0.000246706	0.0177794	-0.013876	0.988929	NA	AC007663.2
0.454618	0.00649125	0.020603	0.278065	0.780963	NA	AC007663.3
5.9259	-0.0712026	0.0701616	-1.02354	0.306051	NA	AC007663.4
2.25546	-0.035113	0.0426763	-0.851064	0.394734	NA	AC007666.1
0	NA	NA	NA	NA	NA	AC007671.1
0	NA	NA	NA	NA	NA	AC007673.1
0	NA	NA	NA	NA	NA	AC007677.1
0	NA	NA	NA	NA	NA	AC007679.1
0.160569	0.00343096	0.015334	0.223749	0.822953	NA	AC007679.2
3.73011	0.034344	0.0569699	0.605071	0.545132	NA	AC007681.1
0	NA	NA	NA	NA	NA	AC007682.2
0	NA	NA	NA	NA	NA	AC007682.3
13.8003	-0.0855666	0.0896816	-0.960375	0.336866	0.99957	AC007683.1
0.405334	-0.00890361	0.0168001	-0.583931	0.559267	NA	AC007683.2
0.471194	-0.00658199	0.0208861	-0.288816	0.772722	NA	AC007684.1
0	NA	NA	NA	NA	NA	AC007685.1
0	NA	NA	NA	NA	NA	AC007686.1
0	NA	NA	NA	NA	NA	AC007686.2
16.954	-0.0438366	0.0929314	-0.472265	0.636737	0.99957	AC007686.3
1.01155	-0.0150872	0.030002	-0.513853	0.607355	NA	AC007686.4
0.649635	0.0265246	0.0239153	1.0958	0.273168	NA	AC007687.1
0.993222	0.0134492	0.0298155	0.460547	0.645124	NA	AC007688.1
0	NA	NA	NA	NA	NA	AC007688.2
4.73967	0.0595927	0.0624931	0.964812	0.334639	NA	AC007690.1
0	NA	NA	NA	NA	NA	AC007718.1
0	NA	NA	NA	NA	NA	AC007728.1
5.42749	-0.0373039	0.0659635	-0.564561	0.572372	NA	AC007728.2
0.202667	-0.00379755	0.015334	-0.247656	0.804401	NA	AC007728.3
0	NA	NA	NA	NA	NA	AC007731.1
11.8409	-0.0993067	0.089428	-1.11537	0.26469	0.99957	AC007731.2
0.540327	-0.00804129	0.0216815	-0.37909	0.704621	NA	AC007731.3
0	NA	NA	NA	NA	NA	AC007731.4
0	NA	NA	NA	NA	NA	AC007731.5
0	NA	NA	NA	NA	NA	AC007738.1
0.328524	0.00879972	0.0171292	0.504965	0.613583	NA	AC007741.1
0	NA	NA	NA	NA	NA	AC007742.1
0	NA	NA	NA	NA	NA	AC007742.2
6.04394	-0.0753671	0.069809	-1.08652	0.277248	NA	AC007743.1
0	NA	NA	NA	NA	NA	AC007744.1
0	NA	NA	NA	NA	NA	AC007749.1
0	NA	NA	NA	NA	NA	AC007750.1
0.177118	-0.00379755	0.015334	-0.247656	0.804401	NA	AC007751.1
0.294076	-0.000211527	0.0164687	-0.0128442	0.989752	NA	AC007751.2
3.14396	-0.0197285	0.0517566	-0.386293	0.699279	NA	AC007773.1
0	NA	NA	NA	NA	NA	AC007773.3
0.83589	0.0050596	0.0260323	0.196267	0.844401	NA	AC007780.1
0	NA	NA	NA	NA	NA	AC007785.1
0.160569	0.00343096	0.015334	0.223749	0.822953	NA	AC007785.2
6.44208	0.0633342	0.0632924	1.01203	0.311524	NA	AC007785.3
0.160569	0.00343096	0.015334	0.223749	0.822953	NA	AC007786.1
0	NA	NA	NA	NA	NA	AC007786.2
0	NA	NA	NA	NA	NA	AC007786.3
0	NA	NA	NA	NA	NA	AC007787.1
0.852275	0.0176541	0.0264097	0.765591	0.44392	NA	AC007790.1
0	NA	NA	NA	NA	NA	AC007792.1
0	NA	NA	NA	NA	NA	AC007795.1
2.69632	0.0410378	0.0496338	0.849226	0.395756	NA	AC007823.1
0	NA	NA	NA	NA	NA	AC007834.1
0.765216	-0.00524563	0.0253473	-0.205463	0.83721	NA	AC007834.2
27.2841	-0.0376559	0.107286	-0.349406	0.726785	0.99957	AC007842.1
0.83589	0.0050596	0.0260323	0.196267	0.844401	NA	AC007846.1
0	NA	NA	NA	NA	NA	AC007846.2
0.73818	-0.0170374	0.0251323	-0.704623	0.481045	NA	AC007848.1
0	NA	NA	NA	NA	NA	AC007848.2
0	NA	NA	NA	NA	NA	AC007849.1
0	NA	NA	NA	NA	NA	AC007849.2
0	NA	NA	NA	NA	NA	AC007861.1
0	NA	NA	NA	NA	NA	AC007861.2
0	NA	NA	NA	NA	NA	AC007876.1
22.7685	-0.0476907	0.103979	-0.457715	0.647157	0.99957	AC007878.1
0	NA	NA	NA	NA	NA	AC007879.1
0	NA	NA	NA	NA	NA	AC007879.2
0.708336	-0.00161348	0.0256454	-0.0638949	0.949054	NA	AC007879.3
0.160569	0.00343096	0.015334	0.223749	0.822953	NA	AC007879.4
0.160542	0.00343096	0.015334	0.223749	0.822953	NA	AC007881.1
0	NA	NA	NA	NA	NA	AC007881.2
0.876528	-0.0236295	0.0284069	-0.894112	0.371262	NA	AC007881.3
0	NA	NA	NA	NA	NA	AC007899.1
0.133507	-0.00379755	0.015334	-0.247656	0.804401	NA	AC007906.1
45.0261	0.132228	0.118673	1.11272	0.265829	0.99957	AC007906.2
0.202667	-0.00379755	0.015334	-0.247656	0.804401	NA	AC007907.1
0	NA	NA	NA	NA	NA	AC007919.1
0	NA	NA	NA	NA	NA	AC007919.2
0	NA	NA	NA	NA	NA	AC007920.1
0.664698	-0.000275825	0.0251637	-0.0109906	0.991231	NA	AC007920.2
0	NA	NA	NA	NA	NA	AC007922.1
0.40052	-0.0121371	0.0168399	-0.602186	0.547051	NA	AC007922.2
0	NA	NA	NA	NA	NA	AC007922.3
0.160569	0.00343096	0.015334	0.223749	0.822953	NA	AC007923.1
0	NA	NA	NA	NA	NA	AC007923.2
0	NA	NA	NA	NA	NA	AC007923.3
0	NA	NA	NA	NA	NA	AC007923.4
1.77369	-0.0488102	0.0401689	-1.28514	0.198743	NA	AC007938.1
5.80686	-0.00835883	0.0661924	-0.126529	0.899313	NA	AC007938.2
13.6368	-0.0308725	0.0911034	-0.338977	0.734627	0.99957	AC007938.3
0	NA	NA	NA	NA	NA	AC007948.1
0	NA	NA	NA	NA	NA	AC007950.1
0	NA	NA	NA	NA	NA	AC007950.2
0.133507	-0.00379755	0.015334	-0.247656	0.804401	NA	AC007952.1
1.10883	-0.0212052	0.0328902	-0.658192	0.510415	NA	AC007952.2
0	NA	NA	NA	NA	NA	AC007952.3
0.859742	0.0205289	0.0283085	0.824486	0.409664	NA	AC007952.4
0	NA	NA	NA	NA	NA	AC007952.5
0.133507	-0.00379755	0.015334	-0.247656	0.804401	NA	AC007952.6
0	NA	NA	NA	NA	NA	AC007952.7
0	NA	NA	NA	NA	NA	AC007952.8
0	NA	NA	NA	NA	NA	AC007952.9
0	NA	NA	NA	NA	NA	AC007953.1
0	NA	NA	NA	NA	NA	AC007953.2
0.657311	-0.00045124	0.0235965	-0.019128	0.984739	NA	AC007954.1
0.133507	-0.00379755	0.015334	-0.247656	0.804401	NA	AC007956.1
0	NA	NA	NA	NA	NA	AC007965.1
0.646589	0.00060293	0.0234754	0.0255789	0.979593	NA	AC007966.1
0	NA	NA	NA	NA	NA	AC007967.1
0	NA	NA	NA	NA	NA	AC007967.2
0	NA	NA	NA	NA	NA	AC007967.3
151.308	-0.0169663	0.121237	-0.13995	0.8887	0.99957	AC007969.1
0.133507	-0.00379755	0.015334	-0.247656	0.804401	NA	AC007969.2
0	NA	NA	NA	NA	NA	AC007991.1
12.8058	0.0789585	0.0880027	0.895776	0.370372	0.99957	AC007991.2
10.0763	-0.0438984	0.0816386	-0.539008	0.589881	0.99957	AC007991.3
2.65872	0.00752892	0.044024	0.16955	0.865364	NA	AC007991.4
0	NA	NA	NA	NA	NA	AC007992.1
0	NA	NA	NA	NA	NA	AC007992.2
0	NA	NA	NA	NA	NA	AC007993.1
0	NA	NA	NA	NA	NA	AC007993.2
0.805644	-0.00546964	0.0257505	-0.213211	0.831163	NA	AC007993.3
30.8024	-0.0329611	0.114328	-0.287964	0.773375	0.99957	AC007996.1
0	NA	NA	NA	NA	NA	AC007998.1
0	NA	NA	NA	NA	NA	AC007998.2
2.15766	0.0354988	0.0452048	0.804296	0.421226	NA	AC007998.3
0.167982	0.00343096	0.015334	0.223749	0.822953	NA	AC007998.4
0	NA	NA	NA	NA	NA	AC007998.5
0	NA	NA	NA	NA	NA	AC008011.1
0	NA	NA	NA	NA	NA	AC008011.2
0.167982	0.00343096	0.015334	0.223749	0.822953	NA	AC008012.1
1.61124	-0.00146296	0.0355896	-0.0402362	0.967905	NA	AC008013.1
0	NA	NA	NA	NA	NA	AC008013.2
0.328524	0.00879972	0.0171292	0.504965	0.613583	NA	AC008013.3
7.04722	-0.0292711	0.0724953	-0.407198	0.683863	NA	AC008014.1
0	NA	NA	NA	NA	NA	AC008015.1
0.799718	0.0080678	0.028714	0.280569	0.779041	NA	AC008026.1
0	NA	NA	NA	NA	NA	AC008026.2
1.36387	0.0116016	0.0335593	0.352524	0.724445	NA	AC008026.3
0.202667	-0.00379755	0.015334	-0.247656	0.804401	NA	AC008033.1
0	NA	NA	NA	NA	NA	AC008033.2
0	NA	NA	NA	NA	NA	AC008033.3
0.918416	-0.00846101	0.0268145	-0.324475	0.745578	NA	AC008035.1
[truncated: 55,782 more rows]
