# Supplementary material for: Controlling gene activation by enhancers through a drug-inducible topological insulator
Source: eLife. 2020 May 5;9:e47980. doi: 10.7554/eLife.47980 (PMC7200164; doi:10.7554/eLife.47980)
Supplement: Figure 3—source code 1. — The R code for the PCA in Figure 3. [file elife-47980-fig3-code1.r]

library(ggplot2)

#4C-seq read counts in bins
countTable <- as.data.frame(read.table("4CMYCcount.txt", header = F, row.names = 1))

#colors and shapes for the PCA plots
col4Call <-read.table("4CMYCcolor.txt", header = F)
shape4Call<-read.table("4CMYCshape.txt", header = F)

#ALL_clones/whole_locus
count4C<-countTable
coordinate<-as.numeric(count4C[2,])
count4C<-countTable[c(-1,-2),]
col4C<-col4Call
shape4C<-shape4Call
title <- "PC1 (all clones)"
breaks <- seq(127500000, 131000000, 500000)
limits<-NULL

#subsetting clones/regions
#without_non-blocking/whole_locus
count4C<-countTable
coordinate<-as.numeric(count4C[2,])
count4C<-count4C[c(-1,-2, -4, -9, -13, -18),]
col4C<-col4Call[c(-2, -7, -11, -16),]
shape4C<-shape4Call[c(-2, -7, -11, -16),]
title <- "PC1 (w/o Hap)"
breaks <- seq(127500000, 131000000, 500000)
limits<-NULL

#Hap&STITCH/whole_locus
count4C<-countTable
coordinate<-as.numeric(count4C[2,])
count4C<-count4C[c(4, 5, 9, 11,13, 14, 18, 20),]
col4C<-col4Call[c(2,3,7,9,11,12,16,18),]
shape4C<-shape4Call[c(2,3,7,9,11,12,16,18),]
title <- "PC1 (WT & STITCH)"
breaks <- seq(127500000, 131000000, 500000)
limits<-NULL

#Hap&STITCH/Right_only
count4C<-countTable[,c(31:50)]
coordinate<-as.numeric(count4C[2,])
count4C<-count4C[c(4, 5, 9, 11,13, 14, 18, 20),]
col4C<-col4Call[c(2,3,7,9,11,12,16,18),]
shape4C<-shape4Call[c(2,3,7,9,11,12,16,18),]
title <- "PC1 (WT & STITCH)"
breaks <- seq(128800000, 129400000, 600000)
limits<-c(128700000, 129500000)

#Hap&STITCH/Left_only
count4C<-countTable[,c(1:30)]
coordinate<-as.numeric(count4C[2,])
count4C<-count4C[c(4, 5, 9, 11,13, 14, 18, 20),]
col4C<-col4Call[c(2,3,7,9,11,12,16,18),]
shape4C<-shape4Call[c(2,3,7,9,11,12,16,18),]
title <- "PC1 (WT & STITCH)"
breaks <- seq(127800000, 128800000, 1000000)
limits<-c(127700000, 128900000)

#Common
#PCA
norm4C<-count4C/rowSums(count4C)
PCA4C <- prcomp(norm4C, scale = TRUE)
#variance
PCAvariance<-(summary(PCA4C))$importance
pc1var<-round(PCAvariance[2,1]*100, 1)
pc2var<-round(PCAvariance[2,2]*100,1)
#PCAplot
dfPCA4C <- as.data.frame(PCA4C$x)
dfPCA4C$Allele <- sapply( strsplit(as.character(row.names(dfPCA4C)), "_"), "[[", 2 )
PCAtitle<-paste0("PCA ",round((coordinate[1]/1000000),1),"-",round((rev(coordinate)[1]/1000000),1), "Mb")
pc1 <- paste0("PC1 (", pc1var, "% variance)")
pc2 <- paste0("PC2 (", pc2var, "% variance)")
col<-as.character(col4C$V2)
names(col)<-as.character(dfPCA4C$Allele)
shape<-as.numeric(shape4C$V2)
names(shape)<-as.character(dfPCA4C$Allele)
PCAlim<-ceiling(max(abs(dfPCA4C$PC1), abs((dfPCA4C$PC2))))
PCAplot<-ggplot(dfPCA4C,aes(x=PC2,y=PC1, color=Allele, shape=Allele ))+
  labs(title=PCAtitle, x =pc2, y = pc1)+
  geom_point(size=2, stroke=2)+
  scale_shape_manual(values = shape)+
  scale_color_manual(values=col)+
  ylim(-PCAlim,PCAlim)+
  xlim(-PCAlim,PCAlim)+
  theme(plot.title = element_text(size=12, hjust=0.5, face="bold"),
        legend.text = element_text(size=11),
        legend.title = element_text(size=12),
        legend.position = "left",
        axis.text.x = element_text(size=10, angle=0),
        axis.text.y = element_text(size=10, angle=90),
        axis.title.x = element_text(size=12, face="bold"),
        axis.title.y = element_text(size=12, face="bold"),
        axis.line.x = element_line(linetype = "solid", size=1, color="black"),
        axis.line.y = element_line(linetype = "solid", size=1, color="black")
  )
PCAplot
#Component Loading
CL4C <- sweep(PCA4C$rotation, MARGIN=2, PCA4C$sdev, FUN="*")
CL4C<- as.data.frame(cbind(CL4C, coordinate))
CLplot<-ggplot(CL4C, aes(y=PC1, x=coordinate))+
  labs(title=title, x ="Chr8", y = "Component Loading")+
  geom_point(shape=21, size=1.5, fill="black")+
  scale_x_continuous(breaks = breaks, limits=limits)+
  theme(plot.title = element_text(size=12, hjust=0.5, face="bold"),
        axis.text.x = element_text(size=10, angle=0, hjust=0.5),
        axis.text.y = element_text(size=12, angle=0),
        axis.title.x = element_text(size=12, face="bold"),
        axis.title.y = element_text(size=12, face="bold"),
        legend.position='none',
        axis.line.x = element_line(linetype = "solid", size=1, color="black"),
        axis.line.y = element_line(linetype = "solid", size=1, color="black")
  )
CLplot
