# Supplementary material for: Controlling gene activation by enhancers through a drug-inducible topological insulator
Source: eLife. 2020 May 5;9:e47980. doi: 10.7554/eLife.47980 (PMC7200164; doi:10.7554/eLife.47980)
Supplement: Figure 3—source data 1. [file elife-47980-fig3-data1.xlsx]

## Sheet: Sheet1
Figure 3B, Figure 3-figure supplement 2 - 4C-seq read counts in the intervals
	chr8	chr8	chr8	chr8	chr8
	127825136	128775680	129345680	130095680	127825136
	128718559	129345679	130095679	130725679	130742614
	Left	Right1	Right2	Right3	3Mb-10kb
VP-MYC1_Hap_1	96319	357882	77847	41839	609321
VP-MYC2_Hap_1	29865	97612	20706	10585	167615
VP-MYC2_Hap_2	7152	24611	6231	3360	43006
VP-MYC1_STITCH+30_1	166887	113799	42942	28536	390884
VP-MYC1_STITCH+30_2	177266	127398	45509	31919	429809
VP-MYC2_STITCH+30_1	90767	61189	22720	16005	207596
VP-MYC2_STITCH+30_2	90329	63555	22857	16407	213109
VP-MYC2_STITCH+30_3	18345	15870	6837	3667	50027
VP-MYC1_delL_1	108838	150877	71841	43126	403166
VP-MYC2_delL_1	50912	69058	33875	18131	185956
VP-MYC2_delL_2	24364	33528	15720	4913	84460
VP-MYC1_delR_1	131589	111701	35768	25528	337836
VP-MYC2_delR_1	59484	50600	16899	11792	151847
VP-MYC2_delR_2	43982	31196	12503	7578	103911
VP-MYC1_invR_1	182172	115985	38705	24931	408060
VP-MYC2_invR_1	62788	45386	14592	9748	148523
VP-MYC2_invR_2	35427	18351	7130	3475	73020
VP-MYC1_del(L2-R2)_1	100854	177785	59318	34784	404730
VP-MYC2_del(L2-R2)_1	27507	46026	16160	8807	106828
VP-MYC2_del(L2-R2)_2	21901	36736	11916	6608	84692
VP-MYC2_del(L2-R2)_3	27451	45142	14423	6823	98909
VP-MYC1_del(L1-R2)_1	87649	162093	53575	28130	357939
VP-MYC2_del(L1-R2)_1	56833	103160	36880	20838	232302
VP-MYC2_del(L1-R2)_2	22489	39095	16445	9501	91792
VP-MYC2_del(L1-R2)_3	19218	36586	15091	8372	84040
VP-MYC1_del(L1-R3)_1	65797	244747	46331	24607	403400
VP-MYC2_del(L1-R3)_1	30557	108628	22707	11652	182635
VP-MYC2_del(L1-R3)_2	7947	23178	5197	2869	42361
VP-MYC1_inv(L1-R3)_1	163296	134123	52220	33628	427650
VP-MYC2_inv(L1-R3)_1	47848	37830	14529	9126	121361
VP-MYC2_inv(L1-R3)_2	8222	6960	2791	1619	21849
Figure 3-figure supplement 3 - 4C-seq read counts in the intervals
	chr8	chr8	chr8	chr8	chr8	chr8
	127737654	128758107	128237654	128758107	128637654	128758107
	128737653	129758106	128737653	129258106	128737653	128858106
	MYCleft1Mb	MYCright1Mb	MYCleft500kb	MYCright500kb	MYCleft100kb	MYCright100kb
VP-MYC1_Hap_1	114346	432098	86122	344432	42289	103448
VP-MYC2_Hap_1	34392	116213	26497	92670	12413	25664
VP-MYC2_Hap_2	8151	29366	6551	22891	2945	6480
VP-MYC1_STITCH30kb_1	185972	165976	136213	122073	50806	47263
VP-MYC1_STITCH30kb_2	199446	187399	147393	140645	57666	58583
VP-MYC2_STITCH30kb_1	99239	87147	71638	63081	25285	23329
VP-MYC2_STITCH30kb_2	100040	90784	72824	66324	26761	24518
VP-MYC2_STITCH30kb_3	21077	23416	15100	16376	5286	6380
VP-MYC1_delR_1	146727	156387	106897	119254	41244	51178
VP-MYC2_delR_1	65194	71466	46886	52852	16224	22402
VP-MYC2_delR_2	48716	46029	35615	32534	13125	13361
VP-MYC1_delL_1	125717	215325	95134	141384	41211	36979
VP-MYC2_delL_1	59490	98460	46455	63674	20039	16465
VP-MYC2_delL_2	27492	47453	19901	31379	8796	6514
	chr8	chr8	chr8	chr8	chr8	chr8
	127765681	128785679	128255681	128785679	128665681	128785679
	128765680	129785678	128755680	129285678	128765680	128885678
	STITCHleft1Mb	STITCHright1Mb	STITCHleft500kb	STITCHright500kb	STITCHleft100kb	STITCHright100kb
VP-STITCH-left_Hap_1	9085	23563	5145	20138	4546	9515
VP-STITCH-right_Hap_1	4319	10918	2598	9367	1895	4413
VP-STITCH-left_STITCH30kb_1	19431	18612	11965	14788	7595	4601
VP-STITCH-left_STITCH30kb_2	5057	4651	3051	3506	2098	1129
VP-STITCH-right_STITCH30kb_1	4141	16851	2484	14780	1251	7086
VP-STITCH-right_STITCH30kb_2	3328	13870	2030	11855	721	5467
VP-STITCH-left_delR_1	10516	9533	6600	7348	3358	2594
VP-STITCH-left_delR_2	4630	4198	2892	3277	1488	1180
VP-STITCH-right_delR_1	3624	5735	2285	4678	906	2011
VP-STITCH-right_delR_2	2424	3437	1532	2719	748	1158
VP-STITCH-left_delL_1	5441	19853	3097	16657	2560	6085
VP-STITCH-right_delL_1	2901	15394	1851	13515	1180	5955
