# Supplementary material for: Controlling gene activation by enhancers through a drug-inducible topological insulator
Source: eLife. 2020 May 5;9:e47980. doi: 10.7554/eLife.47980 (PMC7200164; doi:10.7554/eLife.47980)
Supplement: Figure 4—source data 1. [file elife-47980-fig4-data1.xlsx]

## Sheet: K4me3_peaks
Figure 4C-H3K4me3 nChIP-seq read counts in the peaks
	Hap_1	Hap_2	STITCH_1	STITCH_2
chr1_712931_715631	299	297	122	340
chr1_760931_763749	294	260	120	347
chr1_893391_897080	284	260	136	323
chr1_933896_937534	14	10	9	29
chr1_948293_949560	9	11	11	14
chr1_954530_957802	124	136	54	146
chr1_967991_970514	36	18	17	41
chr1_975327_976631	8	8	9	15
chr1_993865_995715	22	11	16	27
chr1_1003768_1005418	27	15	7	36
chr1_1014959_1016551	23	11	11	37
chr1_1049756_1052728	130	113	52	167
chr1_1071871_1073263	13	12	4	23
chr1_1092763_1094147	23	18	15	19
chr1_1135768_1137429	33	18	11	31
chr1_1141023_1142548	10	1	8	16
chr1_1166135_1169135	167	157	61	210
chr1_1207444_1210443	224	237	109	301
chr1_1240877_1245817	204	164	54	209
chr1_1258239_1261823	199	190	96	237
chr1_1282606_1291045	165	180	79	207
chr1_1292543_1294398	10	16	9	23
chr1_1308776_1311915	250	255	118	309
chr1_1331031_1337326	529	464	195	577
chr1_1340021_1345676	489	441	218	577
chr1_1361162_1363590	23	20	13	25
chr1_1365117_1366448	13	13	4	3
chr1_1368568_1373212	77	66	36	100
chr1_1404831_1409046	381	364	142	442
chr1_1445867_1448843	311	294	131	383
chr1_1473852_1477122	113	89	46	160
chr1_1508431_1512655	416	394	174	496
chr1_1532307_1536595	24	11	19	45
chr1_1549333_1552689	180	206	71	196
chr1_1563886_1568182	36	39	14	45
chr1_1589534_1591609	192	214	81	264
chr1_1614764_1616339	11	4	7	12
chr1_1623553_1626279	154	170	63	167
chr1_1654896_1656884	221	184	87	281
chr1_1676617_1678198	152	141	52	171
chr1_1708469_1712337	202	172	71	207
chr1_1819853_1824009	410	380	140	554
chr1_1839498_1841605	29	38	15	40
chr1_1849288_1851903	44	34	21	43
chr1_1934521_1935695	9	4	6	11
chr1_1949305_1951841	28	26	9	33
chr1_1980349_1983893	153	161	72	243
chr1_2063984_2065554	8	11	7	17
chr1_2125051_2127454	72	72	46	117
chr1_2135419_2137543	13	11	7	17
chr1_2143481_2144773	11	11	5	11
chr1_2157655_2163588	239	208	124	359
chr1_2178897_2180476	9	11	2	12
chr1_2244973_2247631	45	39	23	49
chr1_2321322_2324977	333	371	161	448
chr1_2342389_2345632	203	185	88	255
chr1_2456118_2458821	178	180	81	240
chr1_2460382_2462058	12	10	8	28
chr1_2477369_2479627	61	54	24	67
chr1_2515377_2519747	190	206	81	212
chr1_2559250_2561082	20	13	12	32
chr1_2573300_2575692	56	58	34	85
chr1_3370521_3373058	78	51	30	84
chr1_3446802_3448930	28	23	16	42
chr1_3526822_3528481	45	51	27	66
chr1_3540276_3543147	247	226	109	273
chr1_3565268_3570008	145	105	51	168
chr1_3662794_3664580	117	125	34	145
chr1_3687889_3690249	47	23	17	58
chr1_3709453_3714231	271	267	115	366
chr1_3772286_3775044	154	157	70	221
chr1_3815314_3818499	272	202	97	287
chr1_4714007_4716832	46	31	15	48
chr1_6050854_6054341	126	98	46	116
chr1_6238937_6241603	17	13	12	26
chr1_6257387_6261498	482	466	207	528
chr1_6268497_6270071	15	5	7	10
chr1_6294490_6297268	204	195	84	236
chr1_6298450_6306960	132	109	87	237
chr1_6319695_6322038	56	50	19	67
chr1_6444738_6447092	20	22	16	22
chr1_6451637_6454810	193	184	68	184
chr1_6479393_6480598	11	6	6	11
chr1_6506389_6509608	59	39	29	73
chr1_6525406_6526682	12	14	10	3
chr1_6544244_6546801	113	121	49	138
chr1_6549593_6551964	86	71	40	99
chr1_6555792_6558504	71	41	16	70
chr1_6612940_6615164	266	246	120	307
chr1_6639155_6641659	149	148	55	206
chr1_6659816_6664935	319	291	103	301
chr1_6672056_6676705	342	343	138	405
chr1_6684339_6687107	128	95	62	153
chr1_6759629_6762995	339	298	126	366
chr1_6842968_6847596	271	265	100	322
chr1_7021209_7024285	42	41	26	55
chr1_7129687_7131009	5	10	6	17
chr1_7739762_7741856	58	47	19	50
chr1_7763656_7765295	21	26	12	29
chr1_7830182_7833140	202	173	103	253
chr1_7842897_7844479	13	13	7	27
chr1_8019989_8023385	220	251	88	271
chr1_8083014_8087061	285	302	105	284
chr1_8276938_8278191	9	12	6	26
chr1_8377527_8379174	13	18	11	21
chr1_8482364_8486107	149	129	69	166
chr1_8758310_8765676	371	334	136	366
chr1_8874791_8879055	289	284	114	337
chr1_8934312_8940496	446	428	118	325
chr1_9188315_9190257	39	40	24	57
chr1_9240654_9244143	81	85	37	105
chr1_9261448_9262798	11	6	7	15
chr1_9293862_9296078	64	64	24	83
chr1_9352032_9354493	83	62	29	109
chr1_9488416_9489748	18	6	4	20
chr1_9598973_9601103	139	129	45	157
chr1_9648293_9650607	146	134	51	154
chr1_9711213_9713392	54	39	26	49
chr1_9746778_9751492	96	93	57	123
chr1_9882087_9885630	183	225	101	277
chr1_9910135_9911416	13	10	4	15
chr1_9968596_9971910	161	170	73	214
chr1_10001804_10004756	249	215	105	298
chr1_10056880_10058642	23	24	18	25
chr1_10092538_10095302	295	293	104	357
chr1_10269158_10273251	274	245	109	294
chr1_10457777_10461551	313	300	124	367
chr1_10488216_10492015	66	59	28	90
chr1_10531157_10536725	384	334	159	463
chr1_10697836_10699946	14	11	7	31
chr1_10709217_10711916	23	16	13	31
chr1_10752930_10755854	88	89	43	123
chr1_10763960_10765412	14	9	8	22
chr1_10768554_10770474	15	13	13	34
chr1_10852890_10857056	68	53	39	92
chr1_10926289_10927971	27	18	7	20
chr1_10948008_10949822	34	14	26	48
chr1_11071558_11074697	325	333	121	353
chr1_11118379_11121668	271	232	103	311
chr1_11158265_11160600	264	247	92	341
chr1_11321255_11323934	250	229	114	331
chr1_11332798_11335861	215	205	90	232
chr1_11538339_11540709	86	85	29	114
chr1_11708510_11709768	12	3	4	13
chr1_11713681_11716178	73	47	41	89
chr1_11723624_11725417	26	12	11	27
chr1_11739487_11743366	129	104	62	153
chr1_11749502_11753888	338	335	167	529
chr1_11795656_11797829	90	85	37	104
chr1_11862897_11867659	278	281	127	368
chr1_11967851_11970356	30	30	18	47
chr1_11984427_11987162	216	179	78	249
chr1_11993822_11995804	47	54	19	73
chr1_12039458_12042065	176	186	100	260
chr1_12078460_12080931	140	126	63	179
chr1_12123094_12125079	70	37	16	40
chr1_12289491_12292052	218	221	96	276
chr1_12654446_12656880	50	33	11	53
chr1_12674563_12680591	421	416	171	635
chr1_13839334_13840851	14	16	6	19
chr1_13909302_13913214	200	182	75	280
chr1_14025842_14027936	97	98	32	128
chr1_14074975_14077382	164	152	54	164
chr1_14218769_14220353	43	41	19	52
chr1_14924060_14927506	123	122	46	166
chr1_15250228_15252328	55	51	23	73
chr1_15478439_15481674	93	90	45	118
chr1_15573194_15574982	32	30	19	58
chr1_15735160_15737876	99	108	47	147
chr1_15849563_15854760	253	222	101	248
chr1_15910670_15912110	27	32	15	41
chr1_15929270_15930983	32	28	10	49
chr1_15942820_15946006	260	265	102	268
chr1_16009585_16012636	175	143	87	252
chr1_16083557_16087934	216	232	89	354
chr1_16159958_16163450	130	126	40	131
chr1_16173181_16177539	282	263	89	287
chr1_16301397_16303253	169	148	57	198
chr1_16338933_16340556	10	15	15	27
chr1_16351992_16354359	19	13	9	20
chr1_16374604_16376021	21	18	13	27
chr1_16399077_16401003	30	23	21	46
chr1_16479173_16483585	263	217	80	239
chr1_16492943_16495194	39	14	18	52
chr1_16532638_16534989	30	39	17	52
chr1_16537836_16539849	49	50	30	85
chr1_16542498_16544497	16	14	15	20
chr1_16552886_16554164	8	6	9	18
chr1_16562942_16564746	59	33	30	62
chr1_16677045_16679989	221	205	106	291
chr1_16693282_16695809	257	255	143	342
chr1_16766376_16768865	170	146	78	188
chr1_16824182_16827017	96	95	43	113
chr1_16838881_16841371	47	47	36	87
chr1_16846711_16848679	78	72	45	93
chr1_16858447_16863536	241	207	155	353
chr1_16885643_16888855	28	22	21	28
chr1_16890807_16894076	41	26	32	46
chr1_16918577_16920285	19	14	16	21
chr1_16925823_16932015	42	40	38	45
chr1_16935476_16945166	393	365	189	479
chr1_16946293_16950422	33	24	29	26
chr1_16969821_16975158	544	520	238	688
chr1_17019478_17021257	29	17	11	31
chr1_17024439_17028569	33	25	19	60
chr1_17033426_17035424	45	31	25	50
chr1_17053327_17054962	11	11	13	13
chr1_17185520_17187368	106	94	55	140
chr1_17197327_17202461	248	208	157	332
chr1_17214750_17216861	101	106	58	132
chr1_17230148_17232939	25	20	8	29
chr1_17239670_17242108	56	47	21	75
chr1_17247811_17249681	83	71	28	56
chr1_17264774_17266530	16	9	17	21
chr1_17286904_17288169	16	14	8	25
chr1_17305015_17308381	188	216	99	262
chr1_17337182_17340170	138	144	81	188
chr1_17378328_17381474	156	179	87	223
chr1_17444876_17446759	51	44	27	73
chr1_17759724_17768464	689	624	252	837
chr1_17795721_17797660	20	8	3	17
chr1_17865182_17868346	156	151	80	275
chr1_18433360_18438065	135	123	52	165
chr1_18962763_18964360	10	5	5	14
chr1_19042839_19044349	16	19	8	24
chr1_19110373_19111791	17	7	4	21
chr1_19227732_19230349	159	138	57	161
chr1_19281168_19284444	79	56	33	88
chr1_19534686_19538946	436	391	150	462
chr1_19576208_19580505	512	513	195	570
chr1_19637137_19639952	157	131	56	190
chr1_19807862_19814000	344	308	170	509
chr1_19922410_19925458	185	211	80	254
chr1_19970039_19972646	54	51	24	64
chr1_19991011_19992452	24	21	13	30
chr1_20125865_20127198	33	21	14	34
chr1_20208203_20210629	187	149	61	181
chr1_20512049_20513665	32	25	11	44
chr1_20617429_20618723	12	17	3	14
chr1_20669402_20671151	16	13	8	33
chr1_20692275_20694136	26	18	8	18
chr1_20810216_20814289	129	114	76	180
chr1_20832921_20835386	218	185	107	267
chr1_20959398_20961626	100	54	40	91
chr1_20986161_20989434	353	310	141	418
chr1_21022579_21024307	18	10	13	32
chr1_21043510_21045183	23	15	7	20
chr1_21056159_21059823	36	31	23	46
chr1_21110043_21115969	443	406	147	534
chr1_21500261_21503960	225	203	87	261
chr1_21615535_21617983	86	81	43	117
chr1_21670579_21673385	140	98	65	161
chr1_21762624_21764139	8	14	10	26
chr1_21765837_21767850	79	52	25	89
chr1_21835272_21837658	96	80	36	113
chr1_21947963_21949876	31	32	18	36
chr1_21977375_21979430	41	27	26	58
chr1_21985535_21986796	11	14	4	18
chr1_21994913_21997134	60	71	27	91
chr1_22107786_22110962	366	345	133	421
chr1_22140556_22141826	9	4	8	22
chr1_22262055_22264658	107	106	39	127
chr1_22350580_22353456	234	191	88	237
chr1_22378740_22381113	177	172	68	216
chr1_22468102_22471092	60	65	35	98
chr1_22777439_22779774	231	195	82	270
chr1_22888949_22890870	34	37	20	52
chr1_23036468_23038938	105	92	41	115
chr1_23344233_23348652	506	460	175	499
chr1_23492711_23496325	240	257	124	344
chr1_23503562_23505383	17	16	13	27
chr1_23542564_23545103	115	130	43	162
chr1_23666477_23672131	349	352	150	409
chr1_23694010_23696485	83	59	35	77
chr1_23750635_23752005	13	8	6	25
chr1_23763122_23764338	10	8	3	10
chr1_23809149_23812233	77	64	30	93
chr1_23855820_23858664	46	36	20	57
chr1_23880086_23889896	411	362	188	537
chr1_23894332_23895932	48	39	18	50
chr1_23945272_23946956	36	25	13	33
chr1_24017579_24021522	462	395	166	450
chr1_24068163_24072288	294	277	120	372
chr1_24103757_24106994	313	311	112	352
chr1_24116760_24119694	207	180	81	257
chr1_24125470_24128838	147	151	59	180
chr1_24150382_24152987	152	176	78	241
chr1_24164232_24165642	11	10	8	5
chr1_24193939_24195443	32	21	14	54
chr1_24228887_24230138	15	9	4	13
chr1_24305230_24306409	114	127	40	124
chr1_24476375_24478932	24	26	10	40
chr1_24512919_24514948	88	78	31	78
chr1_24645361_24650082	57	40	27	58
chr1_24738939_24743410	156	145	65	176
chr1_24789929_24791980	20	24	11	32
chr1_24828241_24831743	154	152	74	231
chr1_24882074_24883393	40	25	18	40
chr1_24967924_24972483	457	466	172	574
chr1_25065619_25066680	11	3	3	9
chr1_25071092_25076510	339	371	139	432
chr1_25174102_25175656	16	16	10	29
chr1_25255536_25257505	10	12	7	25
chr1_25558037_25560636	372	414	141	444
chr1_25564614_25567828	50	45	21	64
chr1_25569973_25575417	300	272	129	317
chr1_25592737_25594870	131	139	49	129
chr1_25662908_25666840	369	349	142	467
chr1_25755860_25759436	276	237	119	307
chr1_25869497_25871916	107	88	39	112
chr1_25941908_25945769	74	98	51	108
chr1_26126107_26128116	57	47	24	70
chr1_26144803_26148193	160	162	75	188
chr1_26184565_26187130	168	156	58	184
chr1_26200874_26203460	38	21	23	55
chr1_26230473_26234344	200	230	93	246
chr1_26248252_26251100	61	50	34	81
chr1_26320948_26325236	105	68	35	110
chr1_26360589_26363471	62	31	21	46
chr1_26371718_26373149	14	10	5	11
chr1_26436441_26440026	220	198	78	231
chr1_26481239_26483915	19	16	20	35
chr1_26485400_26489269	36	23	14	18
chr1_26495429_26497641	93	102	36	116
chr1_26503553_26504934	16	16	11	27
chr1_26551279_26552848	16	19	14	28
chr1_26559863_26562410	165	155	46	171
chr1_26605193_26608579	94	95	36	116
chr1_26631717_26634245	142	111	59	180
chr1_26661694_26663830	47	39	20	61
chr1_26685846_26687678	32	26	16	47
chr1_26735328_26746375	603	561	248	812
chr1_26756042_26760224	151	122	59	156
chr1_26797663_26801464	280	278	85	349
chr1_26826358_26829042	64	53	31	84
chr1_26855290_26859045	118	106	58	161
chr1_26945141_26948731	88	73	31	95
chr1_27016676_27030562	729	718	294	1046
chr1_27049271_27051967	33	16	14	27
chr1_27110992_27116358	117	87	52	129
chr1_27151657_27154694	114	108	57	161
chr1_27190650_27192498	36	37	11	31
chr1_27215195_27217768	179	166	74	196
chr1_27225408_27227911	248	254	101	352
chr1_27245159_27250187	194	194	90	259
chr1_27285415_27288103	205	236	95	269
chr1_27319106_27324521	303	261	109	348
chr1_27325128_27327844	18	5	10	19
chr1_27332582_27339857	396	364	185	514
chr1_27479670_27482343	59	38	33	78
chr1_27560016_27562938	102	123	35	177
chr1_27648070_27650169	272	224	115	329
chr1_27667796_27669076	9	13	8	12
chr1_27675533_27679253	45	41	20	59
chr1_27686377_27688307	39	28	17	46
chr1_27691592_27694327	53	65	39	65
chr1_27717806_27720332	71	66	34	79
chr1_27814719_27817459	221	182	91	284
chr1_27853286_27855805	45	44	18	54
chr1_27894010_27899177	31	23	21	41
chr1_27900602_27903370	42	38	21	61
chr1_27927959_27933262	173	188	92	278
chr1_27940918_27942440	17	16	3	17
chr1_27960264_27961873	26	16	14	30
chr1_27985867_27987268	33	23	15	29
chr1_28051051_28054281	110	112	70	131
chr1_28098478_28101266	159	147	71	193
chr1_28156378_28161036	345	327	118	397
chr1_28198155_28200270	49	36	27	61
chr1_28239519_28241969	152	162	63	168
chr1_28261027_28264580	48	65	33	92
chr1_28285570_28287937	53	59	23	86
chr1_28413202_28416215	272	240	123	319
chr1_28557704_28566060	547	539	231	670
chr1_28572822_28574934	60	48	22	57
chr1_28584672_28588993	266	254	112	298
chr1_28654457_28657084	146	141	60	160
chr1_28695174_28698203	185	197	90	247
chr1_28831099_28837081	668	603	185	551
chr1_28844006_28846410	122	112	40	133
chr1_28878507_28880977	137	151	60	159
chr1_28903584_28909939	497	473	139	433
chr1_28918318_28922162	38	29	25	55
chr1_28967710_28971312	201	205	95	281
chr1_28973909_28975564	15	7	12	12
chr1_28994303_28996926	112	110	48	139
chr1_29061663_29067128	471	537	203	633
chr1_29138013_29139712	21	22	12	18
chr1_29212774_29215252	88	86	53	118
chr1_29240180_29243151	116	127	44	142
chr1_29447516_29451908	84	86	41	137
chr1_29505732_29509570	406	403	137	458
chr1_29555854_29558147	104	96	36	96
chr1_29562090_29565634	62	44	28	83
chr1_29585696_29587957	39	39	19	59
chr1_29609641_29611176	8	13	8	19
chr1_29804028_29805955	30	26	18	28
chr1_31158061_31159382	10	4	6	17
chr1_31191033_31192625	15	8	5	12
chr1_31296680_31298395	16	10	7	23
chr1_31379893_31382756	64	63	25	147
chr1_31534520_31539490	511	524	189	557
chr1_31626922_31629385	59	54	29	77
chr1_31710913_31713937	141	121	63	177
chr1_31767225_31771575	522	585	227	663
chr1_31844832_31846979	35	31	17	33
chr1_31885142_31887955	151	164	79	221
chr1_32014478_32015764	15	15	9	22
chr1_32054087_32055455	9	18	4	18
chr1_32082606_32084414	44	27	21	52
chr1_32108725_32111735	283	256	97	305
chr1_32168859_32170932	32	23	18	57
chr1_32179630_32181832	24	26	17	31
chr1_32225036_32230929	162	123	74	220
chr1_32237480_32238899	17	17	4	22
chr1_32253446_32255430	75	61	35	91
chr1_32401636_32404676	200	193	79	239
chr1_32409028_32411128	29	15	9	28
chr1_32477681_32483592	557	466	187	690
chr1_32537524_32540272	105	79	49	120
chr1_32573213_32575105	356	293	159	442
chr1_32644054_32647092	102	107	37	130
chr1_32665509_32667507	43	23	14	47
chr1_32670151_32672406	90	104	27	116
chr1_32686173_32690117	323	304	151	349
chr1_32704218_32707706	99	82	46	144
chr1_32713613_32714625	11	2	2	14
chr1_32739224_32741056	22	11	6	16
chr1_32756624_32759223	125	120	55	180
chr1_32797059_32803484	420	412	166	511
chr1_32816533_32818567	38	29	21	56
chr1_32826864_32828836	13	7	5	32
chr1_32858206_32861739	325	291	128	369
chr1_32913133_32914765	20	10	6	18
chr1_32929414_32932003	86	93	39	140
chr1_32965063_32967436	74	104	43	100
chr1_33004131_33007502	137	140	60	184
chr1_33077158_33078449	7	20	8	20
chr1_33114823_33119075	420	377	158	451
chr1_33167558_33169779	44	50	22	62
chr1_33206127_33209099	121	110	35	159
chr1_33219044_33222614	217	202	79	284
chr1_33224771_33228010	23	13	11	40
chr1_33230553_33233322	68	58	49	90
chr1_33277470_33287280	504	523	211	580
chr1_33335305_33337613	23	27	20	57
chr1_33358428_33360288	37	32	25	62
chr1_33366060_33367790	35	20	13	40
chr1_33389669_33392527	44	26	26	67
chr1_33428927_33431631	65	60	49	144
chr1_33437718_33439109	19	18	3	28
chr1_33501267_33503317	122	114	51	111
chr1_33545773_33548235	31	39	15	50
chr1_33584872_33586518	11	3	3	14
chr1_33592081_33594595	173	112	56	182
chr1_33646393_33648904	82	67	40	78
chr1_33720402_33724145	165	167	103	258
chr1_33813751_33816834	125	97	63	170
chr1_33895207_33897307	56	39	14	48
chr1_33937928_33939338	46	31	24	68
chr1_34627511_34634103	315	293	128	382
chr1_34642144_34643242	10	8	3	9
chr1_35246280_35248359	49	41	24	64
chr1_35258104_35259412	22	16	10	26
chr1_35323856_35326066	245	256	103	302
chr1_35330863_35332583	20	16	9	27
chr1_35350215_35352289	39	24	21	61
chr1_35394000_35396733	111	85	36	139
chr1_35449512_35452008	115	102	44	153
chr1_35496207_35498400	158	147	52	194
chr1_35544067_35547026	178	136	71	183
chr1_35652272_35660027	806	773	297	1049
chr1_35675604_35676977	11	6	4	19
chr1_35733245_35736321	300	245	92	299
chr1_36018922_36025147	349	297	155	394
chr1_36038236_36039682	16	11	13	11
chr1_36041935_36044498	17	11	11	27
chr1_36103608_36108786	323	379	140	449
chr1_36172735_36174768	52	49	29	73
chr1_36183081_36185375	66	54	29	78
chr1_36233745_36236746	233	204	79	262
chr1_36272448_36275252	162	145	72	189
chr1_36347844_36353756	276	259	112	329
chr1_36394872_36398863	333	318	142	406
chr1_36549307_36550596	19	24	13	43
chr1_36553948_36556433	173	179	49	221
chr1_36590027_36591556	20	15	10	29
chr1_36614036_36617346	78	69	30	97
chr1_36620340_36624010	190	197	93	257
chr1_36626027_36627650	31	29	13	26
chr1_36643460_36645366	31	18	24	40
chr1_36688847_36692925	360	345	148	411
chr1_36770990_36773680	78	54	27	88
chr1_36785997_36790663	94	98	41	119
chr1_36849709_36855320	203	227	85	251
chr1_36862204_36864503	144	133	42	155
chr1_36915254_36917511	32	28	28	64
chr1_36928470_36931100	320	332	109	354
chr1_37498072_37504284	60	33	35	77
chr1_37937154_37943515	103	94	34	130
chr1_37978308_37981469	191	159	64	205
chr1_38018429_38023813	232	279	121	333
chr1_38059573_38062137	261	226	111	278
chr1_38099856_38101121	10	5	5	20
chr1_38125729_38126891	6	10	7	14
chr1_38154597_38159675	348	364	160	439
chr1_38200550_38201810	25	24	16	37
chr1_38217903_38219898	22	16	13	36
chr1_38230412_38233041	16	16	6	17
chr1_38258976_38261169	48	44	19	58
chr1_38272355_38277492	353	361	134	385
chr1_38324025_38326620	298	268	96	352
chr1_38396145_38398168	128	129	56	175
chr1_38411423_38413525	77	63	27	70
chr1_38453880_38456355	282	259	103	301
chr1_38460329_38463298	36	25	13	49
chr1_38469172_38472143	110	90	38	139
chr1_38477640_38479751	228	211	69	243
chr1_38508258_38514468	242	194	96	235
chr1_38888499_38897625	460	404	160	471
chr1_38941361_38943539	40	18	13	46
chr1_39024067_39025948	14	11	9	25
chr1_39043608_39045248	18	31	14	43
chr1_39269216_39270879	27	11	7	20
chr1_39283359_39285099	27	20	18	36
chr1_39323350_39327065	249	225	88	295
chr1_39337397_39340448	212	186	78	236
chr1_39451132_39452579	3	10	3	14
chr1_39454353_39460938	593	532	272	805
chr1_39482307_39483639	11	7	2	12
chr1_39490864_39493948	243	226	82	276
chr1_39546029_39548558	93	73	40	121
chr1_39568253_39574279	380	353	137	468
chr1_39623713_39627081	53	26	22	62
chr1_39733499_39738795	55	40	30	62
chr1_39873324_39878424	212	203	94	256
chr1_39956275_39957967	20	15	7	18
chr1_40024174_40026267	62	61	27	80
chr1_40038501_40043314	369	399	119	386
chr1_40104362_40106056	20	22	20	37
chr1_40136850_40138369	11	11	6	22
chr1_40166244_40167631	11	11	7	15
chr1_40204289_40205875	102	130	48	152
chr1_40253678_40255509	31	10	5	23
chr1_40347342_40350104	227	211	97	247
chr1_40363536_40368904	148	132	62	197
chr1_40420332_40422519	92	90	35	122
chr1_40504506_40508359	301	259	115	349
chr1_40562129_40563779	91	83	44	122
chr1_40625960_40629371	273	271	101	351
chr1_40721844_40725304	532	478	204	583
chr1_40780467_40783561	25	11	17	24
chr1_40838867_40841317	122	110	32	124
chr1_40914970_40917150	62	55	24	60
chr1_40942293_40944116	91	100	35	108
chr1_40973671_40975432	60	50	21	69
chr1_40996441_40998734	153	134	58	148
chr1_41119269_41120883	15	14	13	18
chr1_41130338_41132253	93	72	49	121
chr1_41155551_41159592	269	230	91	229
chr1_41174267_41178144	230	203	89	272
chr1_41248215_41250558	40	38	12	68
chr1_41283515_41285206	30	32	11	31
chr1_41326577_41328683	52	47	27	66
chr1_41349475_41350668	19	14	9	17
chr1_41444193_41447538	269	275	71	237
chr1_41706012_41709369	118	129	44	141
chr1_41826504_41828283	27	19	9	28
chr1_41831315_41833137	26	22	10	40
chr1_41847021_41849702	52	38	24	58
chr1_42127225_42129335	43	37	26	85
chr1_42382984_42386046	27	29	17	47
chr1_42500341_42502752	85	86	31	136
chr1_42798528_42802605	380	350	126	415
chr1_42845581_42847582	70	70	31	107
chr1_42920949_42923302	107	135	55	138
chr1_42927858_42930290	57	47	35	74
chr1_43122826_43125665	216	215	103	266
chr1_43143584_43152772	585	579	209	618
chr1_43204991_43207437	18	15	12	16
chr1_43230454_43234370	271	250	122	328
chr1_43281374_43283880	112	104	42	138
chr1_43311072_43313923	236	204	79	227
chr1_43388092_43391642	50	45	25	58
chr1_43420793_43429827	702	648	293	844
chr1_43473122_43475437	24	14	7	21
chr1_43585921_43587078	16	6	4	15
chr1_43613033_43614304	14	14	7	26
chr1_43636378_43638804	153	159	78	188
chr1_43735343_43737699	51	41	26	48
chr1_43750388_43751954	21	8	10	24
chr1_43813618_43816543	57	49	27	67
chr1_43823075_43827448	255	286	96	304
chr1_43830972_43834787	88	69	40	107
chr1_43854218_43856950	298	267	97	297
chr1_43918435_43920654	25	32	22	43
chr1_43995556_43999542	241	212	97	327
chr1_44015225_44016895	7	11	6	14
chr1_44114717_44119576	315	276	126	329
chr1_44171712_44174972	212	184	74	211
chr1_44231547_44233120	11	11	12	13
chr1_44398581_44403131	84	64	48	99
chr1_44411651_44413872	81	70	26	103
chr1_44434052_44437242	206	187	99	262
chr1_44439692_44446648	327	306	123	400
chr1_44456171_44458761	64	81	39	85
chr1_44494730_44498389	267	232	93	287
chr1_44678144_44680457	139	123	62	182
chr1_44819554_44822050	120	122	52	143
chr1_44870214_44875350	266	238	119	303
chr1_44882459_44884646	44	24	15	30
chr1_44965870_44967885	17	16	10	25
chr1_44988804_44990986	9	9	13	19
chr1_45007769_45009938	9	9	8	20
chr1_45082141_45083760	24	20	14	20
chr1_45096585_45099207	103	82	31	121
chr1_45138905_45141345	74	84	34	116
chr1_45204753_45207394	211	227	83	265
chr1_45239811_45243716	396	341	152	466
chr1_45249103_45253134	21	30	17	46
chr1_45265023_45267126	82	62	27	62
chr1_45285351_45286607	13	14	5	12
chr1_45307832_45309822	34	30	14	41
chr1_45451092_45453026	99	109	42	120
chr1_45475339_45479311	207	204	101	247
chr1_45670450_45673348	110	105	45	131
chr1_45768359_45770886	66	50	29	99
chr1_45804126_45807361	313	302	105	339
chr1_45954570_45957866	135	137	56	173
chr1_45964268_45967371	76	78	35	87
chr1_45984511_45988967	405	461	153	417
chr1_46016118_46018515	183	168	73	203
chr1_46048384_46052820	668	640	191	716
chr1_46147304_46155190	742	724	259	841
chr1_46215257_46217204	40	37	15	53
chr1_46268230_46271116	136	131	50	161
chr1_46391339_46393826	15	14	5	23
chr1_46595637_46599996	205	163	69	252
chr1_46663006_46665388	129	108	60	114
chr1_46667869_46670617	166	117	69	204
chr1_46712207_46715805	170	157	87	190
chr1_46764175_46771823	643	589	220	712
chr1_46805197_46807763	71	91	37	91
chr1_46859548_46861734	30	31	14	51
chr1_46908096_46909363	13	10	3	15
chr1_46913150_46915197	25	15	10	26
chr1_46931457_46933341	35	29	19	49
chr1_47009200_47010793	27	31	11	47
chr1_47069075_47070759	28	24	20	36
chr1_47081602_47083547	48	36	25	55
chr1_47131780_47134952	131	140	49	191
chr1_47182807_47185678	193	178	65	223
chr1_47488918_47490302	19	25	10	40
chr1_47643883_47645357	10	3	3	14
chr1_47778574_47781043	245	265	103	287
chr1_47798431_47801127	176	153	83	194
chr1_47902013_47903860	19	12	6	17
chr1_47973123_47975237	24	15	12	39
chr1_47998699_47999751	14	9	7	17
chr1_48058549_48059583	6	11	7	13
chr1_48174436_48176285	22	20	7	31
chr1_48461352_48463921	126	119	57	155
chr1_48936398_48938486	62	64	29	78
chr1_49241129_49243946	194	209	60	267
chr1_49722477_49724027	30	27	14	57
chr1_50488793_50490330	7	20	10	34
chr1_50798566_50799571	7	7	7	9
chr1_51424032_51427019	221	207	65	236
chr1_51433565_51436122	26	27	8	27
chr1_51442894_51444517	20	15	11	33
chr1_51701140_51704337	249	254	99	310
chr1_51795206_51797611	68	44	19	71
chr1_51885657_51889600	68	64	29	79
chr1_51983153_51985708	154	174	52	212
chr1_52081944_52084436	146	158	54	182
chr1_52193981_52197159	219	204	112	326
chr1_52340482_52345953	293	304	131	368
chr1_52454660_52457080	120	101	55	203
chr1_52497631_52500388	128	174	57	209
chr1_52519544_52524454	631	655	225	750
chr1_52606793_52609877	213	194	70	249
chr1_52830195_52835250	150	170	48	183
chr1_52868275_52872129	546	578	190	585
chr1_53016907_53021251	280	283	103	348
chr1_53067351_53069539	33	31	21	43
chr1_53163003_53164693	45	39	16	46
chr1_53168372_53169882	22	14	3	21
chr1_53191218_53193601	150	131	61	198
chr1_53307780_53309888	14	20	6	19
chr1_53385974_53387984	30	40	18	58
chr1_53392397_53394158	24	29	19	31
chr1_53480392_53481935	79	77	41	132
chr1_53527162_53529428	38	29	14	51
chr1_53661498_53663821	198	189	87	224
chr1_53684901_53687458	124	90	57	110
chr1_53702061_53705372	259	234	73	285
chr1_53790949_53795032	313	292	106	303
chr1_53913923_53915186	10	7	10	14
chr1_54203822_54205612	12	12	9	27
chr1_54302400_54305076	302	305	123	317
chr1_54354422_54356265	115	96	46	147
chr1_54410264_54415510	207	204	107	316
chr1_54517125_54520381	366	343	156	482
chr1_54586902_54588164	3	10	5	11
chr1_54664621_54667721	372	330	149	433
chr1_54774653_54776752	15	10	9	16
chr1_54869182_54874279	315	332	123	429
chr1_54939604_54941668	22	12	13	31
chr1_54952845_54955465	27	26	15	36
chr1_54964700_54966305	28	14	16	26
chr1_55007454_55009505	45	36	17	50
chr1_55180674_55183038	214	196	90	257
chr1_55228798_55231300	152	165	67	197
chr1_55349415_55354627	330	283	104	330
chr1_55445404_55447055	11	12	13	27
chr1_55462080_55463168	8	15	0	15
chr1_55504498_55507309	61	54	16	43
chr1_55678448_55682525	243	250	91	305
chr1_56942656_56944250	18	20	9	31
chr1_57040917_57045996	466	443	194	656
chr1_57109755_57112567	117	135	43	139
chr1_57886884_57891217	156	131	59	237
chr1_58713854_58716756	46	37	31	76
chr1_59011240_59013055	94	90	34	121
chr1_59164148_59166670	269	271	97	290
chr1_59246182_59251768	276	227	87	333
chr1_59280397_59282726	32	21	18	37
chr1_59368745_59370387	24	24	9	30
chr1_59542669_59544421	13	5	12	9
chr1_59761422_59763613	50	29	22	64
chr1_60279913_60282463	61	77	26	68
chr1_60391398_60393079	26	20	11	35
chr1_60538622_60540228	14	10	12	28
chr1_61508387_61509663	12	4	4	14
chr1_61514983_61520832	98	78	28	130
chr1_61522478_61523849	19	16	8	25
chr1_61542044_61544224	40	41	15	40
chr1_61547097_61550149	58	81	40	87
chr1_62189217_62191966	223	206	81	268
chr1_62207303_62209984	207	210	79	226
chr1_62646726_62649539	26	14	6	28
chr1_62658086_62666604	626	572	227	703
chr1_62783776_62785903	61	41	22	81
chr1_62900793_62906042	408	415	162	473
chr1_63152597_63155771	214	210	90	297
chr1_63219980_63222311	48	60	25	62
chr1_63248815_63251398	204	211	81	237
chr1_63539128_63540364	18	13	10	29
chr1_63782524_63793455	558	576	183	676
chr1_63795483_63797104	16	14	9	21
chr1_63832354_63834628	107	104	38	133
chr1_63987377_63990423	258	233	105	258
chr1_64058195_64060758	122	95	46	143
chr1_64238439_64248334	442	370	161	593
chr1_64934566_64940241	521	532	217	722
chr1_64970381_64971652	8	14	5	14
chr1_65209976_65212730	146	152	58	209
chr1_65430387_65433514	135	136	52	179
chr1_65467811_65469444	27	36	15	50
chr1_65530338_65534910	329	291	90	352
chr1_65612458_65616804	226	167	69	211
chr1_65719735_65721791	65	69	25	80
chr1_65730048_65732296	36	18	18	44
chr1_65774144_65776666	49	40	17	75
chr1_65884448_65888385	195	198	67	244
chr1_65990826_65992373	37	19	11	39
chr1_66015786_66017153	16	16	3	7
chr1_66257870_66259779	28	27	15	47
chr1_66797590_66800116	95	77	28	104
chr1_66819478_66821993	35	32	11	37
chr1_66998565_67000298	44	52	15	51
chr1_67217540_67218956	20	20	14	32
chr1_67388323_67392718	250	217	83	266
chr1_67394800_67398029	182	176	76	224
chr1_67518070_67520576	117	126	57	189
chr1_67772676_67774526	44	37	22	66
chr1_67891430_67898292	755	815	240	862
chr1_68150100_68153389	249	251	90	293
chr1_68297264_68300174	125	110	63	129
chr1_68696463_68699313	41	46	27	61
chr1_68961468_68963394	110	137	42	130
chr1_70032963_70036463	48	42	30	54
chr1_70669784_70673055	478	485	137	544
chr1_70686069_70689484	310	361	104	330
chr1_70818013_70821440	292	288	95	336
chr1_70875392_70879323	310	281	88	272
chr1_71171446_71173188	26	26	13	42
chr1_71512362_71514380	24	21	12	33
chr1_71543970_71547699	417	442	117	391
chr1_72747076_72751178	219	202	70	287
chr1_74663072_74664935	50	36	15	45
chr1_75138768_75140105	23	25	8	21
chr1_75197876_75201437	275	249	85	247
chr1_75599945_75603854	50	48	18	54
chr1_75840663_75842226	33	20	12	31
chr1_76079996_76082991	93	68	46	132
chr1_76189184_76192881	156	165	55	163
chr1_76250748_76255797	513	494	133	421
chr1_76539912_76541871	60	40	39	73
chr1_77332458_77335251	115	128	60	145
chr1_77683657_77686602	276	280	86	306
chr1_77746490_77749691	74	68	41	93
chr1_78146302_78150669	294	306	101	292
chr1_78223575_78226378	192	190	74	242
chr1_78245109_78246713	131	130	49	178
chr1_78353549_78356413	182	178	71	251
chr1_78441010_78447786	639	680	239	678
chr1_78469853_78471266	10	16	8	11
chr1_78510910_78513105	38	43	14	46
chr1_78956015_78957758	21	27	7	35
chr1_79471676_79473247	38	25	14	55
chr1_81771163_81773498	14	11	7	25
chr1_82264500_82271755	539	540	211	688
chr1_83312200_83314441	137	150	53	172
chr1_84463662_84466228	91	96	34	132
chr1_84541977_84545446	241	287	83	310
chr1_84763325_84765724	94	106	35	100
chr1_84944469_84946670	212	195	70	233
chr1_84969697_84973295	221	177	51	236
chr1_85038874_85040977	25	26	15	23
chr1_85086089_85087136	9	17	3	15
chr1_85153916_85157764	204	197	65	198
chr1_85357976_85359684	33	27	14	37
chr1_85461706_85464414	79	63	27	70
chr1_85513134_85515025	53	57	20	50
chr1_85527267_85528592	11	14	10	20
chr1_85664197_85668641	256	246	76	275
chr1_85723641_85726530	202	217	84	263
chr1_85740323_85743413	154	149	70	186
chr1_85928719_85931817	122	106	46	115
chr1_86041302_86050850	508	478	152	564
chr1_86171962_86174970	155	170	50	161
chr1_86620513_86623332	19	22	12	35
chr1_86860526_86862941	124	110	37	121
chr1_86967572_86969088	19	11	3	17
chr1_87169141_87172442	203	197	78	272
chr1_87377950_87382782	534	575	176	598
chr1_87597038_87598462	16	13	13	12
chr1_87793221_87798793	464	472	180	559
chr1_87800210_87802237	118	107	38	111
chr1_88927390_88929205	25	16	12	16
chr1_89148320_89152506	406	391	142	460
chr1_89355839_89358146	163	166	74	193
chr1_89456681_89459975	162	180	60	180
chr1_89988922_89992076	151	150	59	153
chr1_90097489_90100415	99	83	38	94
chr1_90228121_90229735	15	12	4	22
chr1_90285550_90289319	267	241	109	262
chr1_90308105_90309985	46	38	14	63
chr1_90459869_90463958	302	309	107	345
chr1_90684455_90686164	41	41	15	64
chr1_91316005_91317734	21	29	13	31
chr1_91483438_91488522	320	293	126	346
chr1_91869016_91871106	101	90	42	107
chr1_91965474_91969172	112	119	43	135
chr1_92350586_92352826	76	73	33	97
chr1_92495063_92496736	35	27	11	38
chr1_92545048_92547236	78	62	43	85
chr1_92763157_92766119	300	341	121	347
chr1_92948622_92952960	32	35	16	57
chr1_93249079_93251293	98	93	30	112
chr1_93296691_93301722	523	530	166	558
chr1_93425620_93428630	83	79	33	120
chr1_93543370_93547777	588	548	208	628
chr1_93643270_93648380	194	199	70	197
chr1_93810150_93815668	467	461	162	506
chr1_93911935_93918287	529	492	201	585
chr1_94145936_94148411	86	85	38	144
chr1_94310892_94314221	121	144	61	147
chr1_94342663_94345965	373	376	106	365
chr1_94372853_94376275	153	149	54	171
chr1_94701871_94704193	45	40	13	75
chr1_94712238_94714167	50	56	29	77
chr1_94882387_94885759	178	166	66	218
chr1_95006197_95008673	158	138	63	186
chr1_95284700_95286997	63	47	23	89
chr1_95389544_95395385	420	408	160	467
chr1_95537449_95539411	113	104	37	111
chr1_95581855_95584610	130	102	30	156
chr1_95698367_95700788	122	103	45	155
chr1_97186408_97189921	302	279	91	297
chr1_98385332_98387880	89	99	24	96
chr1_98510333_98512136	19	20	13	37
chr1_98518146_98520618	37	30	24	66
chr1_99126545_99128761	100	80	33	110
chr1_99468740_99471647	80	82	36	118
chr1_99729663_99730985	38	28	15	51
chr1_100231535_100232628	30	22	8	22
chr1_100315159_100317242	114	86	60	137
chr1_100434620_100436837	93	126	52	158
chr1_100501690_100506289	429	400	133	407
chr1_100596745_100600055	327	313	110	372
chr1_100714056_100715823	219	218	76	228
chr1_100730523_100733342	216	228	71	227
chr1_100815961_100820685	195	208	77	275
chr1_101004178_101006080	18	6	8	14
chr1_101358575_101363295	410	443	133	411
chr1_101489628_101492942	292	281	112	246
chr1_101700835_101703626	56	49	18	74
chr1_101774738_101775805	7	9	6	11
chr1_102311874_102313160	12	11	2	9
chr1_102461713_102462987	19	11	13	18
chr1_103571954_103575317	124	109	39	135
chr1_104068138_104070567	164	177	51	208
chr1_107598926_107602031	168	196	70	212
chr1_107681867_107685484	141	157	39	189
chr1_108505610_108508751	102	98	50	131
chr1_108741113_108744306	192	185	60	189
chr1_109102068_109104131	34	38	19	60
chr1_109203520_109204696	10	14	12	9
chr1_109232801_109238100	703	659	214	712
chr1_109288973_109290771	117	142	43	158
chr1_109418532_109421022	61	72	35	97
chr1_109505312_109506676	53	39	20	41
chr1_109583009_109585555	139	113	55	141
chr1_109617463_109619614	201	197	80	253
chr1_109632501_109635048	135	136	63	165
chr1_109642030_109644556	292	301	90	258
chr1_109656059_109657447	16	16	5	17
chr1_109755640_109759006	222	209	79	246
chr1_109791586_109793629	50	56	25	66
chr1_109824037_109827007	94	101	63	180
chr1_109938898_109942003	124	131	51	188
chr1_109967632_109970739	387	342	116	374
chr1_110008607_110010618	34	28	8	45
chr1_110025916_110028540	113	109	27	143
chr1_110036029_110037779	56	59	25	80
chr1_110051380_110053673	60	48	22	72
chr1_110089281_110092769	320	287	136	357
chr1_110161766_110164681	118	139	52	134
chr1_110197914_110199571	49	45	23	62
chr1_110210379_110211668	13	10	7	30
chr1_110281971_110283884	32	27	12	51
chr1_110452645_110454954	52	51	28	71
chr1_110526765_110530253	175	164	70	200
chr1_110546434_110547660	10	9	4	10
chr1_110576222_110578895	265	261	106	307
chr1_110609683_110613884	32	20	15	45
chr1_110626633_110627724	10	9	3	12
chr1_110692755_110694138	11	13	5	18
chr1_110751691_110755729	85	72	35	98
chr1_110879641_110886509	411	394	139	436
chr1_110949139_110951610	198	181	68	227
chr1_111097678_111098792	8	5	9	17
chr1_111148438_111150701	34	32	15	52
chr1_111216972_111218685	42	27	12	52
chr1_111469465_111470567	4	8	5	10
chr1_111504619_111508003	111	94	33	130
chr1_111681242_111684590	284	272	119	324
chr1_111813265_111814551	11	9	3	16
chr1_111888269_111890344	37	32	15	45
chr1_111990309_111993520	479	483	186	532
chr1_112161870_112164107	141	126	50	174
chr1_112279088_112283929	85	92	41	128
chr1_112297007_112300257	314	294	93	336
chr1_112531178_112534420	36	31	15	59
chr1_112937603_112940863	243	239	96	293
chr1_113044134_113045400	12	16	9	22
chr1_113049723_113053304	77	66	43	111
chr1_113160006_113164257	509	493	234	609
chr1_113216560_113219469	174	128	58	191
chr1_113247183_113251009	92	77	48	116
chr1_113256014_113259267	103	75	34	121
chr1_113391816_113393108	16	15	2	19
chr1_113492428_113501494	858	815	341	929
chr1_113614314_113617613	253	249	94	262
chr1_113931148_113934902	143	148	53	195
chr1_114300011_114303280	220	212	70	252
chr1_114352972_114355930	206	210	80	219
chr1_114446315_114449187	236	234	79	258
chr1_114471090_114474074	317	243	107	364
chr1_114521278_114523278	19	11	6	24
chr1_114693170_114697764	224	202	99	315
chr1_115050820_115055281	331	337	120	404
chr1_115122563_115125809	250	218	82	244
chr1_115211534_115213918	75	73	40	101
chr1_115257764_115260453	209	215	71	252
chr1_115297286_115301841	452	423	126	431
chr1_115321833_115324452	223	178	86	260
chr1_115443777_115445567	15	7	8	18
chr1_115630771_115633081	89	80	36	89
chr1_115690112_115691363	53	38	9	43
chr1_115879506_115881859	64	75	30	120
chr1_116183557_116186652	114	109	36	135
chr1_116370482_116371894	19	16	11	27
chr1_116379945_116382924	46	49	25	52
chr1_116517926_116520555	84	103	41	110
chr1_116710195_116711574	28	24	12	32
chr1_116914892_116918591	250	271	109	304
chr1_116959989_116962011	84	101	30	109
chr1_117112595_117114744	74	64	29	70
chr1_117208957_117211478	92	72	33	100
chr1_117420476_117422180	11	9	7	12
chr1_117451384_117454436	207	184	79	222
chr1_117601170_117604428	250	228	83	260
chr1_117662898_117665374	85	77	30	105
chr1_117908141_117913595	214	213	97	266
chr1_118147600_118150456	83	71	34	105
chr1_118470794_118474401	386	353	126	445
chr1_118727314_118728632	12	13	5	19
chr1_119550715_119551794	11	3	6	11
chr1_119681818_119684369	69	75	34	87
chr1_120187756_120191949	302	276	88	290
chr1_120217149_120218760	10	9	14	11
chr1_120229374_120230746	12	5	8	9
chr1_120254149_120258568	411	432	126	440
chr1_120610869_120612544	190	184	84	232
chr1_120837638_120840342	244	211	120	316
chr1_120924861_120926119	42	33	18	57
chr1_121137292_121139377	47	60	17	46
chr1_121143001_121144050	12	14	2	15
chr1_121260133_121262157	36	30	13	35
chr1_121483305_121485849	1713	1580	1539	1573
chr1_143663643_143664974	32	28	21	50
chr1_143742975_143745299	268	256	86	342
chr1_143911720_143914475	244	255	93	329
chr1_144518967_144521664	215	226	95	249
chr1_144593199_144594775	56	57	24	71
chr1_144927219_144934323	228	237	100	325
chr1_144990729_144992336	12	5	6	11
chr1_144992999_144998071	36	32	26	41
chr1_144999878_145007434	41	48	31	62
chr1_145009766_145012127	14	4	17	14
chr1_145014630_145017153	20	14	13	26
chr1_145027565_145034256	57	27	35	32
chr1_145038502_145041305	97	64	46	154
chr1_145071010_145072745	11	9	10	5
chr1_145074697_145081185	70	69	45	127
chr1_145091604_145092972	22	14	13	33
chr1_145096377_145099045	290	251	107	324
chr1_145100186_145101873	12	6	5	13
chr1_145209001_145210907	260	205	100	288
chr1_145381578_145383608	22	17	13	16
chr1_145395158_145400192	302	260	100	390
chr1_145414699_145416305	10	9	6	16
chr1_145436836_145441394	458	492	176	495
chr1_145454769_145456771	21	13	7	20
chr1_145469524_145478381	142	116	79	212
chr1_145506577_145509237	289	276	105	307
chr1_145515174_145517506	133	100	60	154
chr1_145548478_145549853	20	24	12	21
chr1_145561790_145563983	30	26	20	46
chr1_145574348_145577901	168	134	75	243
chr1_145588087_145589912	19	13	22	36
chr1_145609573_145612006	304	278	132	360
chr1_145713318_145714372	7	9	5	14
chr1_145825662_145827559	182	190	68	216
chr1_146008956_146010278	72	69	41	87
chr1_146543600_146545189	29	39	13	46
chr1_146555739_146557569	31	32	14	29
chr1_146642105_146645932	216	185	73	257
chr1_146696221_146697914	34	36	12	45
chr1_146713139_146716466	236	246	55	232
chr1_147011868_147017202	146	162	68	172
chr1_147058238_147059642	10	7	6	13
chr1_147069632_147073481	133	121	75	190
chr1_147140863_147143475	68	70	39	93
chr1_147400257_147402148	179	178	71	196
chr1_147551003_147552031	47	38	24	71
chr1_147718362_147719674	47	40	21	49
chr1_147734986_147738259	91	64	34	112
chr1_147751487_147753431	141	162	63	199
chr1_147775247_147776850	109	108	43	151
chr1_147780932_147783243	67	60	31	110
chr1_147789088_147791524	89	69	47	97
chr1_147805394_147807930	43	47	32	67
chr1_147824559_147827581	78	67	37	105
chr1_147999427_148001173	201	186	82	244
chr1_148175969_148177357	81	96	26	123
chr1_148247180_148248457	173	146	67	231
chr1_148555679_148557248	82	80	34	105
chr1_148598138_148599206	166	138	55	216
chr1_148901290_148902812	28	35	18	48
chr1_148929977_148931644	32	29	18	41
chr1_149058050_149059144	11	12	4	19
chr1_149155801_149157108	25	18	4	15
chr1_149186153_149187582	12	22	8	20
chr1_149193608_149194864	6	12	3	16
chr1_149222253_149225749	59	47	41	80
chr1_149230322_149232391	106	109	55	132
chr1_149285425_149288679	93	67	47	118
chr1_149297443_149300364	185	200	85	285
chr1_149326101_149327131	45	44	14	51
chr1_149332638_149334609	40	30	14	44
chr1_149398699_149400910	94	106	40	132
chr1_149669725_149673809	91	75	37	99
chr1_149682994_149685879	187	194	94	261
chr1_149711418_149712727	52	51	27	82
chr1_149718030_149719902	41	36	11	51
chr1_149764023_149765395	78	58	23	74
chr1_149782054_149785953	265	234	101	301
chr1_149814875_149822374	603	579	203	608
chr1_149854023_149861890	505	503	185	592
chr1_149887623_149890590	143	134	66	173
chr1_149897954_149901098	332	340	128	410
chr1_149907989_149911819	50	36	22	43
chr1_149979918_149983731	322	299	137	360
chr1_150021996_150023379	11	3	3	11
chr1_150038178_150041191	165	178	88	205
chr1_150119296_150124615	232	256	99	303
chr1_150134049_150136548	20	11	16	34
chr1_150185119_150187098	14	13	5	30
chr1_150205059_150210964	491	443	192	602
chr1_150227901_150233270	222	194	89	299
chr1_150239700_150242572	185	201	90	236
chr1_150244246_150246202	15	14	10	24
chr1_150253256_150256291	65	61	32	114
chr1_150265704_150267656	97	130	34	119
chr1_150273840_150276144	16	12	21	10
chr1_150293001_150295788	234	215	91	243
chr1_150335172_150340056	585	569	198	629
chr1_150459197_150461491	208	193	72	265
chr1_150486908_150489437	37	57	24	63
chr1_150520765_150522725	31	31	13	30
chr1_150533077_150536065	66	54	33	84
chr1_150537129_150541618	37	21	20	34
chr1_150546846_150553246	966	889	364	973
chr1_150576432_150577718	10	8	4	10
chr1_150600162_150604251	279	241	108	271
chr1_150667916_150670756	165	147	66	196
chr1_150847613_150850223	162	147	72	211
chr1_150898341_150900563	143	139	51	149
chr1_150943017_150948505	269	258	104	343
chr1_150978082_150982290	86	74	35	114
chr1_151019465_151021971	103	118	49	160
chr1_151030179_151036531	408	353	173	448
chr1_151042200_151044521	79	74	29	96
chr1_151103153_151106448	33	22	13	39
chr1_151116018_151120603	73	75	56	141
chr1_151136844_151140270	274	227	109	276
chr1_151159606_151163595	289	290	132	346
chr1_151169734_151175282	494	464	202	565
chr1_151226413_151228873	332	336	114	338
chr1_151253446_151256954	193	195	98	305
chr1_151266869_151268213	9	8	3	8
chr1_151298440_151301439	179	158	62	192
chr1_151317798_151320964	84	78	35	102
chr1_151371303_151373965	302	283	105	346
chr1_151427009_151432775	226	208	106	303
chr1_151445155_151447065	18	12	8	25
chr1_151482034_151487039	132	123	66	158
chr1_151511892_151514793	230	163	94	229
chr1_151565591_151567075	13	6	8	14
chr1_151582950_151586945	237	225	103	359
chr1_151685708_151690375	46	24	19	70
chr1_151693506_151694946	36	25	15	33
chr1_151734497_151737275	256	296	103	357
chr1_151762071_151764988	180	158	80	207
chr1_151810045_151813267	41	33	27	64
chr1_151880541_151883694	74	90	32	129
chr1_151964310_151967364	104	107	34	128
chr1_152007394_152010100	75	73	40	76
chr1_153233012_153235026	29	18	17	35
chr1_153507889_153509483	25	21	16	24
chr1_153598566_153600806	32	24	14	58
chr1_153605440_153608666	266	240	84	272
chr1_153630411_153632780	135	109	39	150
chr1_153641943_153645264	453	387	182	493
chr1_153650078_153653713	99	80	43	117
chr1_153699876_153702659	100	81	57	155
chr1_153717512_153718845	5	11	4	12
chr1_153747083_153749480	111	107	46	133
chr1_153754899_153756881	35	24	15	49
chr1_153892933_153897124	362	326	135	425
chr1_153916878_153920274	237	217	123	299
chr1_153928639_153941995	604	558	242	692
chr1_153948395_153951752	229	207	85	243
chr1_153956938_153966124	538	489	205	549
chr1_154149157_154160477	436	401	210	566
chr1_154170885_154173034	14	10	11	15
chr1_154191020_154197095	542	612	226	669
chr1_154243857_154247735	189	171	78	218
chr1_154296846_154302549	195	175	94	280
chr1_154324638_154326452	25	24	9	51
chr1_154377478_154379151	16	16	11	36
chr1_154473648_154475164	12	16	12	21
chr1_154528807_154532560	169	172	77	216
chr1_154539247_154541343	52	42	23	60
chr1_154578621_154584374	250	268	92	294
chr1_154598706_154601397	221	216	92	311
chr1_154644367_154645979	19	12	8	18
chr1_154732347_154733627	12	10	4	17
chr1_154839595_154843308	26	12	12	44
chr1_154908302_154910998	61	52	31	66
chr1_154927335_154929885	39	43	27	75
chr1_154932686_154936110	129	112	66	179
chr1_154940081_154949843	632	627	245	715
chr1_154954261_154958412	279	294	125	349
chr1_154971595_154978064	297	237	115	320
chr1_154989393_154991085	17	16	10	26
chr1_155022612_155025315	57	50	19	57
chr1_155034108_155037864	124	123	54	190
chr1_155042296_155044865	24	15	16	23
chr1_155050745_155054826	54	36	31	91
chr1_155056499_155059438	70	55	25	107
chr1_155062810_155064166	5	1	10	10
chr1_155098212_155102965	54	58	26	64
chr1_155106445_155110020	113	106	51	151
chr1_155111934_155114369	159	160	67	224
chr1_155138266_155141022	33	25	23	50
chr1_155143644_155148283	273	265	89	298
chr1_155162100_155167740	448	428	154	520
chr1_155175755_155180503	147	145	84	206
chr1_155195395_155198457	163	156	60	152
chr1_155210324_155211731	17	7	10	27
chr1_155213364_155215528	33	28	15	42
chr1_155224183_155226362	82	85	44	117
chr1_155230411_155234591	98	81	49	136
chr1_155239048_155244362	261	210	85	287
chr1_155246470_155249230	74	69	45	108
chr1_155264155_155266268	36	17	29	100
chr1_155277605_155280926	314	320	138	366
chr1_155287512_155295903	228	214	105	273
chr1_155531273_155534835	493	506	182	555
chr1_155579085_155581012	114	118	48	135
chr1_155657350_155663098	499	475	178	613
chr1_155714698_155715966	114	126	41	127
chr1_155825664_155831246	237	225	106	293
chr1_155879888_155881998	112	106	55	153
chr1_155902345_155905591	350	349	146	402
chr1_155944501_155955241	351	331	139	484
chr1_155989101_155992589	242	209	98	271
chr1_156022080_156026192	301	291	158	395
chr1_156029366_156034076	43	41	35	42
chr1_156041678_156044480	9	11	17	23
chr1_156049198_156054827	527	518	224	830
chr1_156075152_156077436	22	32	16	45
chr1_156081916_156086583	99	91	49	155
chr1_156090132_156094335	25	22	17	33
chr1_156119239_156120736	9	11	3	22
chr1_156151452_156152808	14	8	2	11
chr1_156162886_156165356	141	143	67	182
chr1_156181705_156184420	127	143	70	159
chr1_156250786_156254086	239	234	94	275
chr1_156260608_156261904	14	12	3	9
chr1_156264449_156266133	41	45	9	66
chr1_156305839_156309015	309	292	124	368
chr1_156338663_156340159	20	11	8	25
chr1_156357185_156359196	23	21	10	24
chr1_156389330_156392956	20	20	22	45
chr1_156399072_156400542	11	6	5	10
chr1_156425686_156428147	52	59	22	52
chr1_156467895_156472189	263	224	135	352
chr1_156540789_156543112	166	129	56	204
chr1_156560539_156562822	82	73	39	85
chr1_156569414_156572501	331	293	141	360
chr1_156593458_156595828	24	12	18	23
chr1_156611114_156613086	37	17	17	43
chr1_156626101_156627942	14	12	9	25
chr1_156643225_156648155	225	200	94	269
chr1_156658651_156659969	10	4	6	12
chr1_156661352_156664418	19	12	12	27
chr1_156673414_156678155	83	66	42	118
chr1_156694737_156699973	337	262	108	396
chr1_156709682_156712537	76	74	45	92
chr1_156715009_156723878	517	518	166	620
chr1_156735617_156739365	400	386	153	465
chr1_156783001_156784374	11	11	7	15
chr1_156828506_156831233	19	11	8	36
chr1_156862876_156863990	13	5	4	16
chr1_156889772_156891128	12	8	4	14
chr1_156892967_156894743	12	11	3	29
chr1_157012298_157016921	185	195	84	279
chr1_157106521_157109459	239	231	89	288
chr1_157962102_157965871	233	184	79	273
chr1_158082758_158084086	13	9	10	17
chr1_158147181_158148459	8	11	4	13
chr1_158149870_158151802	26	37	20	62
chr1_158968490_158970702	45	33	12	60
chr1_158975540_158976607	9	10	4	16
chr1_159140455_159143809	156	188	75	204
chr1_159156322_159159107	56	51	22	93
chr1_159750053_159751839	26	27	17	35
chr1_159823690_159825457	62	31	30	56
chr1_159893419_159896160	60	69	19	72
chr1_159914105_159916713	62	59	25	95
chr1_160000010_160003023	230	188	97	246
chr1_160038288_160041245	39	27	19	48
chr1_160065872_160069364	85	80	34	129
chr1_160084319_160087738	40	45	19	52
chr1_160174131_160177615	192	189	66	194
chr1_160229960_160233353	298	311	112	379
chr1_160252718_160255857	240	231	91	316
chr1_160310461_160316708	476	486	175	592
chr1_160344103_160346854	17	10	15	32
chr1_160368696_160373682	260	241	98	325
chr1_160950829_160952534	19	12	13	25
chr1_160987370_160992513	359	314	138	382
chr1_161007384_161009908	91	103	54	164
chr1_161013777_161017016	260	267	100	310
chr1_161067019_161069588	89	91	39	98
chr1_161086982_161089579	227	263	111	281
chr1_161099319_161104464	252	256	116	342
chr1_161122397_161125458	205	191	76	211
chr1_161128294_161131049	121	112	50	143
chr1_161134974_161137713	137	153	71	178
chr1_161145967_161148400	105	101	34	120
chr1_161166678_161173796	152	154	62	209
chr1_161194901_161197210	59	60	34	83
chr1_161228105_161229618	22	16	10	35
chr1_161273508_161276966	118	124	51	141
chr1_161283134_161286311	203	201	90	208
chr1_161358598_161361444	52	61	30	77
chr1_161368261_161371107	136	160	80	195
chr1_161389933_161392426	32	40	19	46
chr1_161396507_161399302	68	73	43	93
chr1_161409026_161410913	89	70	25	78
chr1_161442039_161444021	37	25	24	48
chr1_161493261_161495112	51	46	16	72
chr1_161499498_161503170	172	168	71	218
chr1_161508841_161510700	77	78	33	93
chr1_161580997_161583239	95	105	34	122
chr1_161590287_161592199	44	50	23	69
chr1_161695184_161698218	99	82	49	145
chr1_161718711_161722100	208	178	92	216
chr1_161734828_161737500	249	237	83	251
chr1_161992722_161994882	49	44	9	61
chr1_162038411_162042289	180	186	74	206
chr1_162466490_162469553	283	289	126	376
chr1_162529982_162532869	124	108	36	137
chr1_162600458_162605671	205	191	61	214
chr1_162760226_162761758	108	101	23	105
chr1_162791361_162793353	34	30	14	39
chr1_163169994_163173483	111	111	50	136
chr1_163289984_163293185	265	294	107	318
chr1_164526852_164534699	755	749	275	910
chr1_164544643_164547151	24	12	13	29
chr1_165204460_165205755	24	17	7	25
chr1_165323399_165326767	37	33	24	36
chr1_165344917_165346602	38	31	14	60
chr1_165566642_165568722	41	32	32	72
chr1_165598875_165602283	179	184	64	233
chr1_165666515_165668887	122	122	48	131
chr1_165736998_165739912	261	233	80	252
chr1_165796183_165799306	352	400	112	336
chr1_166134089_166137180	87	96	36	116
chr1_166807690_166810400	126	139	45	142
chr1_166844287_166846148	153	167	74	212
chr1_166889639_166890968	14	13	7	20
chr1_166943789_166945859	39	39	23	71
chr1_167090262_167091586	21	8	8	19
chr1_167134430_167136004	17	23	8	19
chr1_167188164_167192895	304	327	125	458
chr1_167408160_167409415	11	5	4	20
chr1_167423446_167425759	46	39	18	49
chr1_167521858_167524020	84	73	37	70
chr1_167598975_167600388	41	32	20	45
chr1_167682275_167686491	245	249	115	295
chr1_167690078_167693171	245	217	90	252
chr1_167903453_167909462	327	314	128	445
chr1_168104270_168107571	141	164	45	203
chr1_168147343_168149824	166	136	56	176
chr1_168195011_168196554	88	85	26	105
chr1_169074413_169078412	221	200	70	263
chr1_169335610_169339005	305	275	86	331
chr1_169395918_169397432	30	27	9	40
chr1_169429027_169430238	15	8	4	11
chr1_169452386_169456254	173	154	47	163
chr1_169762720_169765753	276	254	85	278
chr1_169861536_169864415	188	158	70	244
chr1_170042827_170044373	30	35	20	46
chr1_170500096_170503065	163	196	67	211
chr1_170630174_170631579	12	13	4	8
chr1_170633106_170634514	19	12	12	13
chr1_171189217_171190504	13	7	1	15
chr1_171219841_171221539	21	10	5	20
chr1_171454376_171457145	346	357	116	392
chr1_171709644_171712820	194	200	86	231
chr1_171749752_171752244	137	122	46	146
chr1_171809807_171812447	79	92	33	123
chr1_172411953_172413929	190	176	57	218
chr1_172500628_172507767	440	374	163	531
chr1_173445256_173449199	260	255	71	295
chr1_173637783_173639520	26	30	12	51
chr1_173683005_173685565	152	145	78	205
chr1_173791743_173795262	298	280	110	373
chr1_173831201_173839532	807	829	235	702
chr1_173989658_173992840	267	282	107	330
chr1_174126998_174130525	133	120	51	175
chr1_174768566_174770696	30	28	12	42
chr1_174840195_174847278	474	492	189	553
chr1_174967296_174971621	287	313	89	276
chr1_174991331_174993565	174	164	68	216
chr1_175160664_175163051	76	73	31	104
chr1_175462188_175463466	9	8	4	12
chr1_175567942_175569080	5	8	6	15
chr1_176173786_176177789	288	343	105	332
chr1_176521259_176522628	12	21	5	21
chr1_177132655_177134987	109	103	41	141
chr1_177139396_177141216	24	37	13	51
chr1_177150357_177151533	16	12	3	14
chr1_178006281_178007881	13	19	10	26
chr1_178061567_178065530	251	255	82	334
chr1_178251682_178253995	23	13	3	21
chr1_178289101_178290286	37	34	13	27
chr1_178309452_178311618	19	19	15	23
chr1_178510477_178513042	96	77	47	124
chr1_178693229_178696525	254	219	83	254
chr1_178993686_178996892	180	172	59	204
chr1_179050477_179052567	83	78	27	57
chr1_179197128_179199880	157	141	47	172
chr1_179262343_179263995	21	21	14	22
chr1_179334243_179336102	83	61	41	90
chr1_179544464_179545948	11	12	6	19
chr1_179712132_179713905	23	15	13	36
chr1_179783792_179785332	13	9	14	25
chr1_179845310_179847693	164	168	61	168
chr1_179850433_179853756	249	251	93	290
chr1_179922667_179926666	260	265	123	293
chr1_180122942_180125740	145	129	46	166
chr1_180197836_180209071	204	191	67	264
chr1_180469892_180472994	161	142	58	191
chr1_180600759_180603608	209	181	79	228
chr1_180880965_180883212	86	87	41	106
chr1_180990068_180992805	215	195	95	249
chr1_181057561_181060752	221	199	58	213
chr1_181072999_181075378	41	41	20	51
chr1_181286601_181288464	14	14	13	46
chr1_181997631_182000188	66	75	28	76
chr1_182030102_182031241	8	10	6	11
chr1_182355435_182362298	533	521	189	697
chr1_182557481_182558721	10	7	5	11
chr1_182572086_182574136	38	40	7	13
chr1_182583217_182585318	17	18	8	22
chr1_182758038_182759626	14	17	12	27
chr1_182807420_182813106	405	345	103	379
chr1_182990618_182994739	236	165	77	219
chr1_183154502_183156497	45	27	17	41
chr1_183385920_183388146	64	47	26	82
chr1_183439125_183444433	289	285	98	328
chr1_183601726_183606467	216	217	82	269
chr1_183773511_183775569	59	51	27	77
chr1_184005108_184007318	32	24	24	39
chr1_184019972_184022114	131	107	55	142
chr1_184353833_184359929	392	359	167	515
chr1_184722523_184725429	170	150	74	167
chr1_184941954_184944202	81	89	32	129
chr1_185013828_185016856	187	200	50	242
chr1_185124239_185128110	266	264	100	274
chr1_185282008_185287842	383	382	140	441
chr1_185702577_185704768	33	38	11	34
chr1_186341984_186347130	536	549	174	553
chr1_186606081_186607165	26	27	9	28
chr1_186648849_186650708	42	51	16	56
chr1_186797823_186799127	24	16	4	11
chr1_190443563_190448745	78	64	30	120
chr1_192777206_192779854	108	110	30	128
chr1_193026693_193030803	386	350	132	376
chr1_193073044_193075620	86	72	27	94
chr1_193089928_193093949	368	375	122	367
chr1_195816489_195817622	17	11	6	10
chr1_196575360_196579034	259	231	72	230
chr1_196865925_196867385	26	20	3	10
chr1_197113133_197116796	328	361	136	402
chr1_197169182_197172042	205	205	66	220
chr1_197743341_197745408	91	95	34	113
chr1_197870726_197872731	47	46	12	55
chr1_197890262_197891383	9	8	3	10
chr1_198125178_198129082	205	218	74	218
chr1_199997094_199999316	46	35	14	39
chr1_200003622_200012844	131	93	49	181
chr1_200017123_200019165	21	15	10	19
chr1_200270981_200272233	17	7	10	14
chr1_200342093_200344098	18	13	16	21
chr1_200374133_200383209	500	511	178	574
chr1_200588017_200590684	146	193	80	228
chr1_200637748_200640429	125	118	35	173
chr1_200706951_200711257	233	205	72	265
chr1_200859437_200864653	252	201	86	277
chr1_200990601_200994617	108	87	43	134
chr1_201082679_201084433	16	14	6	32
chr1_201121652_201124256	147	178	69	197
chr1_201139510_201141189	49	53	16	47
chr1_201228547_201229811	17	10	7	23
chr1_201366902_201369710	55	54	20	56
chr1_201436592_201439481	92	89	40	131
chr1_201448935_201450966	25	18	15	28
chr1_201475191_201476936	44	28	15	35
chr1_201507148_201509894	83	81	34	104
chr1_201616029_201620971	223	197	92	254
chr1_201707673_201710857	137	157	61	205
chr1_201797661_201800356	233	269	78	305
chr1_201857107_201859166	47	41	21	71
chr1_201910373_201911493	9	12	3	10
chr1_201914292_201916761	16	16	6	44
chr1_201923105_201926399	319	373	118	396
chr1_201950899_201953335	160	142	60	165
chr1_201976722_201980736	47	23	21	51
chr1_202112086_202114823	189	173	81	253
chr1_202162303_202163909	9	8	6	28
chr1_202182626_202184556	38	34	12	48
chr1_202309436_202312093	89	103	40	93
chr1_202317317_202319485	119	95	48	155
chr1_202611245_202615024	129	88	40	156
chr1_202677674_202680554	87	63	33	124
chr1_202773968_202781774	494	480	213	696
chr1_202829197_202832032	165	165	81	203
chr1_202856408_202859107	140	122	57	170
chr1_202894854_202897140	139	88	50	148
chr1_202925423_202928580	229	190	104	273
chr1_202934813_202937706	96	82	46	134
chr1_202974956_202978031	280	270	99	283
chr1_202995127_202996913	20	17	11	25
chr1_203044147_203045702	14	15	4	20
chr1_203236288_203237449	14	18	10	21
chr1_203242131_203243336	10	8	2	13
chr1_203259567_203260591	4	11	2	11
chr1_203274079_203276315	41	33	20	41
chr1_203295818_203297567	12	16	10	21
chr1_203594878_203599797	80	86	53	132
chr1_203651726_203652900	16	16	4	9
chr1_203764389_203766968	189	191	70	197
chr1_203829678_203832800	356	318	100	360
chr1_204041473_204048292	475	444	169	549
chr1_204119935_204122070	58	55	24	71
chr1_204182104_204184356	40	21	26	47
chr1_204256287_204258097	9	9	6	13
chr1_204275584_204277575	19	20	19	41
chr1_204346232_204348173	23	25	13	37
chr1_204375007_204382145	1067	1031	386	1174
chr1_204461738_204465161	163	141	90	210
chr1_204474730_204478000	143	120	77	165
chr1_204484683_204487298	131	151	60	182
chr1_204652889_204655709	131	110	44	134
chr1_204775638_204777073	10	6	8	8
chr1_204796800_204799082	57	57	31	77
chr1_205011634_205013628	29	20	16	28
chr1_205089369_205092312	311	266	103	382
chr1_205179253_205181481	174	131	70	194
chr1_205196061_205199028	101	109	52	146
chr1_205269254_205271063	13	6	5	15
chr1_205287903_205291456	165	146	73	203
chr1_205312078_205314140	35	39	23	54
chr1_205399469_205400516	7	17	5	16
chr1_205412920_205414503	9	7	11	16
chr1_205416611_205420429	37	30	22	57
chr1_205423126_205427455	284	248	113	340
chr1_205473136_205475547	91	90	40	105
chr1_205537471_205539177	30	16	13	34
chr1_205598470_205602293	221	251	76	262
chr1_205639195_205640885	9	12	10	24
chr1_205645628_205650702	91	71	25	112
chr1_205715491_205720487	365	403	142	442
chr1_205743218_205745285	44	34	15	53
chr1_205780816_205783925	144	143	52	157
chr1_206135713_206138210	194	193	82	238
chr1_206222935_206224525	19	27	15	39
chr1_206643325_206645499	54	45	18	61
chr1_206679734_206681944	43	32	19	44
chr1_206730127_206731649	39	37	19	52
chr1_206784125_206786454	83	87	52	98
chr1_206807797_206810239	92	73	37	104
chr1_206857339_206861882	214	209	93	275
chr1_207082492_207083848	47	31	21	61
chr1_207222640_207227736	339	304	123	404
chr1_207493488_207496588	145	135	53	162
chr1_207627351_207628728	25	22	7	33
chr1_207669104_207670640	33	25	7	38
chr1_207817915_207819597	29	15	12	28
chr1_207842282_207843774	15	18	16	34
chr1_207924519_207928012	343	342	112	366
chr1_208041244_208043286	46	43	23	51
chr1_208083899_208084987	10	13	4	13
chr1_208132025_208133812	25	20	9	20
chr1_208136153_208137684	10	11	9	20
chr1_208416124_208418560	45	52	31	59
chr1_209602773_209604301	8	13	4	15
chr1_209756825_209759867	17	5	9	21
chr1_209848187_209849882	40	32	15	58
chr1_209956782_209958392	74	92	20	79
chr1_209978204_209980124	61	47	26	68
chr1_210001073_210003195	132	96	50	136
chr1_210110585_210112882	123	112	55	136
chr1_210405295_210408162	65	58	28	78
chr1_210423949_210426951	32	22	20	51
chr1_210465331_210466593	13	9	1	23
chr1_210501840_210503547	57	62	18	77
chr1_211306052_211308002	25	24	10	26
chr1_211430471_211435127	253	216	88	267
chr1_211499011_211501655	42	42	17	63
chr1_211555590_211557356	50	57	20	66
chr1_211572297_211574277	22	17	19	21
chr1_211589113_211590916	19	19	15	30
chr1_211748161_211753940	414	376	138	423
chr1_211847470_211850150	137	121	48	165
chr1_211871808_211873071	28	16	14	34
chr1_212002448_212004990	97	83	30	103
chr1_212062112_212063847	19	19	11	25
chr1_212207130_212212042	358	400	140	370
chr1_212457189_212461705	246	207	88	265
chr1_212586955_212588847	100	100	41	108
chr1_212605350_212607519	84	93	39	121
chr1_212687654_212689080	9	7	8	20
chr1_212731421_212732717	35	50	11	41
chr1_212779245_212785981	216	213	64	221
chr1_212838292_212839444	11	15	6	25
chr1_212872549_212874573	24	11	19	26
chr1_212963948_212966599	261	249	111	357
chr1_213029484_213038282	814	792	296	921
chr1_213082261_213084515	23	27	15	30
chr1_213123043_213127421	293	224	87	337
chr1_213187570_213189749	166	170	75	213
chr1_213224037_213226018	143	127	53	157
chr1_214152159_214154288	25	15	10	39
chr1_214155579_214163944	104	79	49	135
chr1_214397754_214398959	5	9	9	15
chr1_214453536_214455846	130	150	44	133
chr1_214722652_214726614	242	209	82	264
chr1_214775609_214778910	320	329	130	378
chr1_215255234_215257448	30	41	14	57
chr1_215739562_215743073	276	252	88	287
chr1_216773678_216775243	24	21	9	30
chr1_216896314_216897929	32	28	13	51
chr1_217261532_217264201	52	37	15	65
chr1_217307404_217314128	72	73	31	83
chr1_217803119_217805619	195	177	68	234
chr1_218336827_218340123	151	158	47	224
chr1_218457530_218460454	240	251	82	286
chr1_218518305_218521741	92	82	29	120
chr1_219346548_219349051	86	77	38	86
chr1_220100819_220102680	38	19	11	43
chr1_220217738_220220723	191	163	62	176
chr1_220262150_220264091	44	55	20	72
chr1_220266563_220269159	130	142	53	165
chr1_220443809_220446895	193	179	84	229
chr1_220700097_220704597	280	279	103	334
chr1_220863022_220864942	38	69	25	73
chr1_220920760_220922923	44	54	21	70
chr1_220959263_220961553	53	72	21	73
chr1_221049722_221053667	27	23	20	49
chr1_221914246_221917497	98	75	34	121
chr1_222637662_222639619	26	24	11	37
chr1_222762144_222764485	231	225	70	226
chr1_222789904_222793236	163	162	50	208
chr1_222815694_222818914	134	135	58	164
chr1_222883543_222887962	403	395	149	484
chr1_222987559_222990390	134	132	61	171
chr1_223101394_223103975	67	70	31	67
chr1_223201933_223202946	30	22	9	31
chr1_223306806_223308370	11	26	13	28
chr1_223315612_223317141	27	17	7	14
chr1_223535562_223539073	86	89	45	124
chr1_223899273_223901798	46	46	23	79
chr1_223935954_223937392	17	18	11	32
chr1_224031337_224035140	247	216	90	291
chr1_224179487_224182083	271	284	119	311
chr1_224300723_224304568	326	329	123	417
chr1_224369804_224372828	179	135	67	193
chr1_224516095_224519091	354	275	120	374
chr1_224528247_224529277	11	17	6	16
chr1_224544149_224546549	193	213	66	266
chr1_224618480_224624150	347	328	132	432
chr1_224803226_224806214	40	40	23	42
chr1_225117078_225118405	49	35	23	39
chr1_225613104_225617302	192	222	81	243
chr1_225836555_225842832	565	548	205	670
chr1_225963984_225968166	417	378	138	391
chr1_225997183_225999807	91	75	42	104
chr1_226068296_226071555	144	142	59	212
chr1_226110057_226112865	166	193	72	208
chr1_226137966_226139249	9	1	3	10
chr1_226185343_226188240	251	235	94	288
chr1_226247966_226255382	828	796	300	951
chr1_226266006_226267246	11	2	10	1
chr1_226270341_226272185	37	31	17	35
chr1_226296728_226300789	111	117	46	123
chr1_226308894_226311109	54	75	20	78
chr1_226372758_226375681	249	232	105	320
chr1_226410499_226412491	43	23	21	61
chr1_226495242_226498074	254	297	105	330
chr1_226591421_226596831	351	364	126	391
chr1_226735885_226738405	18	15	16	40
chr1_226890144_226892018	21	16	13	41
chr1_226924294_226927593	49	55	35	79
chr1_227057789_227059806	78	72	34	85
chr1_227126536_227129070	68	72	32	69
chr1_227500271_227509198	603	574	210	619
chr1_227729559_227730826	14	15	4	19
chr1_227750789_227752735	141	127	50	169
chr1_227915473_227917650	34	29	22	48
chr1_227921483_227924947	211	196	84	308
chr1_227974348_227977401	39	56	27	76
chr1_228074214_228076071	33	29	13	51
chr1_228134157_228136817	77	57	38	102
chr1_228224547_228226379	14	18	15	34
chr1_228247144_228249292	32	27	19	37
chr1_228269350_228273646	321	312	128	388
chr1_228288889_228292089	168	160	56	203
chr1_228295602_228298343	162	144	76	193
chr1_228318117_228319196	10	5	2	21
chr1_228326812_228329591	166	152	77	181
chr1_228352684_228355636	78	76	33	134
chr1_228400622_228402551	70	44	28	77
chr1_228462727_228464575	16	17	9	46
chr1_228565175_228567872	48	43	27	66
chr1_228592109_228596501	244	282	98	391
chr1_228603396_228605695	34	26	22	50
chr1_228633115_228634608	17	16	13	23
chr1_228642953_228647722	218	222	70	237
chr1_228651201_228654158	31	29	16	55
chr1_228673623_228676652	262	246	98	274
chr1_228770678_228771749	39	28	28	62
chr1_228782300_228784631	38	30	21	56
chr1_228870215_228872788	47	50	32	76
chr1_229406103_229408534	127	108	48	155
chr1_229476282_229479910	143	160	64	195
chr1_229541790_229544278	25	10	16	48
chr1_229569355_229571144	39	29	11	44
chr1_229642346_229645307	255	243	111	288
chr1_229693245_229695415	114	117	59	147
chr1_229759784_229763950	370	375	139	445
chr1_230201943_230205157	258	217	83	250
chr1_230427303_230428669	33	19	10	35
chr1_230467578_230469241	34	25	14	39
chr1_230557231_230564007	175	194	72	229
chr1_230777112_230779919	216	205	93	253
chr1_231002317_231006071	177	150	47	192
chr1_231113342_231116530	243	258	85	330
chr1_231174663_231176998	67	52	22	57
chr1_231296393_231298419	15	24	10	35
chr1_231375690_231378740	300	255	83	255
chr1_231468630_231475823	389	400	145	423
chr1_231556162_231559358	117	114	46	137
chr1_231663276_231666074	183	195	80	191
chr1_231761555_231763857	85	73	22	86
chr1_232254355_232256206	49	42	11	17
chr1_232259492_232263354	127	108	26	129
chr1_232764006_232767132	99	93	39	112
chr1_232940381_232942685	84	93	40	109
chr1_233085308_233087892	147	137	68	159
chr1_233426186_233432639	254	238	95	254
chr1_233462261_233465555	68	67	26	68
chr1_233748578_233752035	130	116	47	173
chr1_234040020_234042103	26	36	8	57
chr1_234349166_234351491	98	61	36	102
chr1_234508137_234510572	326	317	107	350
chr1_234613234_234615443	91	111	28	72
chr1_234734807_234737436	35	32	21	58
chr1_234740152_234747992	282	245	97	307
chr1_234912524_234918396	36	24	22	44
chr1_235289659_235293942	392	447	130	459
chr1_235323196_235325683	223	232	94	272
chr1_235488655_235495612	588	578	252	712
chr1_235530515_235532018	76	63	34	85
chr1_235665626_235669457	196	187	71	198
chr1_235811536_235815080	105	88	29	120
chr1_236028761_236031456	90	89	36	116
chr1_236134825_236136089	11	9	5	12
chr1_236227179_236229538	68	69	28	76
chr1_236304192_236307428	118	89	42	101
chr1_236443960_236446297	44	53	23	62
chr1_236558018_236560249	119	118	42	150
chr1_236686175_236688622	83	97	41	91
chr1_236766580_236769228	202	211	56	198
chr1_236849546_236850564	12	10	3	8
chr1_236957520_236960299	154	160	51	160
chr1_237204406_237209030	156	167	58	153
chr1_238646742_238650131	144	146	62	193
chr1_239549474_239551936	76	55	22	90
chr1_239792608_239793828	13	15	0	12
chr1_240160273_240162230	42	47	10	47
chr1_240254469_240257413	60	60	21	103
chr1_240774578_240775895	22	14	19	32
chr1_241519401_241521384	61	63	20	78
chr1_241586945_241588291	32	17	14	22
chr1_241681552_241684142	189	202	51	221
chr1_241800428_241804313	250	288	89	280
chr1_242010369_242013530	176	245	66	258
chr1_242685970_242689311	163	153	62	212
chr1_243415351_243420557	309	308	95	311
chr1_243646066_243647509	26	23	12	34
chr1_244011467_244015474	211	201	72	244
chr1_244079889_244081815	19	15	14	25
chr1_244210546_244214795	149	164	57	184
chr1_244611346_244616091	161	156	64	169
chr1_244624025_244625633	15	11	11	20
chr1_244815057_244818978	270	255	110	272
chr1_244892956_244894649	15	13	6	20
chr1_244996343_245001918	252	229	80	272
chr1_245023361_245029339	791	753	326	975
chr1_245081647_245082920	35	32	16	51
chr1_245131940_245135836	155	168	66	168
chr1_245316552_245320970	83	51	22	76
chr1_246669237_246671383	64	66	27	81
chr1_246727341_246731474	383	407	145	447
chr1_246886683_246889175	90	97	36	134
chr1_247092949_247096240	265	286	90	314
chr1_247169571_247171982	141	126	41	165
chr1_247240178_247242678	238	228	99	259
chr1_247265628_247268571	225	209	94	265
chr1_247274053_247276136	52	30	23	59
chr1_247372384_247374818	119	119	51	145
chr1_247493463_247497114	357	311	132	350
chr1_247538640_247541277	21	19	10	30
chr1_248020141_248021695	11	24	9	23
chr1_249118822_249121545	189	165	66	213
chr1_249131441_249134278	103	116	40	126
chr1_249151557_249154610	76	81	39	88
chr1_249156630_249158457	28	21	16	34
chr1_249166730_249168931	108	107	40	128
chr1_249198784_249202320	70	72	34	80
chr10_119308_120351	16	6	1	13
chr10_178702_183982	279	240	116	355
chr10_734095_736577	166	122	50	178
chr10_834693_836012	10	10	10	15
chr10_974926_979118	305	289	103	381
chr10_1032487_1036172	370	409	155	434
chr10_1091102_1097673	391	458	127	386
chr10_1099957_1104300	350	332	151	382
chr10_1281241_1282995	97	97	38	123
chr10_1462282_1463692	4	10	9	9
chr10_1778391_1780305	34	41	23	31
chr10_3108333_3112387	200	212	69	221
chr10_3213556_3215401	64	51	30	64
chr10_3824512_3829451	407	406	138	457
chr10_4868161_4869319	9	9	5	10
chr10_5454062_5456560	114	120	48	150
chr10_5488162_5491337	87	80	25	63
chr10_5706943_5709375	115	105	34	113
chr10_5726221_5728868	127	114	42	99
chr10_5734089_5735459	55	46	24	54
chr10_5851473_5857181	476	442	193	562
chr10_5930321_5933761	249	281	78	289
chr10_6018340_6020749	55	44	20	78
chr10_6130066_6133383	222	214	78	242
chr10_6186298_6188319	30	19	17	48
chr10_6205225_6207197	71	61	30	86
chr10_6242698_6247269	102	105	48	142
chr10_6619837_6624428	194	208	60	187
chr10_6843087_6844383	25	29	12	17
chr10_7449040_7455729	136	144	58	180
chr10_7707749_7710197	66	51	23	81
chr10_7828482_7832100	406	432	183	532
chr10_7859018_7862634	285	301	107	357
chr10_8337944_8338951	8	10	5	10
chr10_8373951_8374974	15	5	2	14
chr10_10335352_10336967	12	12	8	18
chr10_11058651_11061707	95	110	35	126
chr10_11206178_11208843	75	73	24	93
chr10_11651175_11654855	285	269	91	324
chr10_11778844_11779912	19	14	8	8
chr10_11864854_11867800	130	129	66	140
chr10_12083069_12085914	220	193	88	272
chr10_12110733_12113485	139	132	48	153
chr10_12170811_12173073	89	79	32	103
chr10_12236274_12239982	541	493	168	485
chr10_12389954_12393878	141	143	42	168
chr10_13042969_13044545	46	39	20	61
chr10_13140680_13143352	93	61	38	106
chr10_13202792_13205296	150	160	61	150
chr10_13340910_13344874	39	47	21	52
chr10_13385000_13395036	606	636	203	791
chr10_13481572_13483129	10	12	9	26
chr10_13569172_13571836	59	63	41	123
chr10_13628777_13630622	140	146	82	207
chr10_13747448_13750633	66	62	32	93
chr10_13932112_13934826	139	112	51	173
chr10_14215085_14216939	47	39	19	57
chr10_14644684_14647511	149	141	44	171
chr10_14879004_14882213	303	299	104	305
chr10_14919027_14923876	381	354	127	442
chr10_14994782_14997214	80	72	50	72
chr10_15000743_15002799	72	79	35	88
chr10_15129732_15131419	33	35	19	40
chr10_15138170_15141619	257	224	95	258
chr10_15208885_15211177	120	120	34	119
chr10_15411438_15413917	93	121	45	149
chr10_15760807_15762552	21	23	10	37
chr10_15900902_15903325	163	164	72	194
chr10_16427229_16429096	18	19	12	24
chr10_16561335_16564579	49	35	33	76
chr10_16858578_16860568	103	85	37	105
chr10_17241254_17244571	93	84	45	92
chr10_17269651_17273634	109	88	50	138
chr10_17494696_17497087	45	45	21	67
chr10_17658120_17660388	92	97	24	105
chr10_17684290_17688221	423	450	160	423
chr10_18428969_18431174	100	86	26	115
chr10_18689173_18690495	28	21	5	34
chr10_18916046_18917304	34	24	6	33
chr10_18938686_18941725	213	190	68	214
chr10_18946907_18951437	431	432	157	484
chr10_20103247_20109032	511	474	176	605
chr10_20658867_20662634	54	46	20	52
chr10_21461682_21464474	140	136	43	173
chr10_21580602_21583879	57	42	26	52
chr10_21782851_21790285	236	189	98	276
chr10_21795629_21810079	325	297	141	474
chr10_21812442_21819161	250	283	101	268
chr10_21821295_21825430	179	218	73	227
chr10_22291121_22293173	93	87	42	119
chr10_22517317_22520384	243	246	78	243
chr10_22540222_22542577	37	46	24	61
chr10_22604230_22606451	49	53	24	51
chr10_22609036_22611584	37	30	14	52
chr10_22613511_22615604	12	22	6	19
chr10_22628790_22630534	25	15	9	30
chr10_22634100_22635258	10	6	3	10
chr10_22725478_22727072	20	28	11	17
chr10_22764711_22767340	32	19	11	23
chr10_23000640_23004326	228	240	97	261
chr10_23383870_23385902	82	100	31	96
chr10_23632251_23634337	41	40	19	39
chr10_23727031_23730366	138	138	37	156
chr10_23982390_23985336	27	25	15	45
chr10_24497149_24499627	89	73	26	102
chr10_25008216_25014735	262	234	103	348
chr10_25240181_25242831	92	64	33	101
chr10_25304667_25306744	45	49	13	41
chr10_25462941_25466526	104	110	42	130
chr10_26222762_26224586	29	30	14	54
chr10_26503616_26507613	33	16	21	54
chr10_26855209_26856861	34	34	12	61
chr10_26910851_26911990	8	14	9	11
chr10_26985343_26988118	232	224	69	207
chr10_27147336_27150640	283	291	127	373
chr10_27388210_27390207	70	84	35	80
chr10_27440971_27446841	584	597	214	646
chr10_27528174_27532311	188	185	70	214
chr10_27541063_27542223	13	10	4	7
chr10_27547540_27549144	58	50	32	111
chr10_27607991_27609447	14	7	8	20
chr10_27792445_27794671	180	165	72	210
chr10_28029887_28036098	99	88	37	104
chr10_28286299_28288705	151	127	64	159
chr10_28590686_28593151	118	131	51	139
chr10_28819826_28824501	425	457	152	543
chr10_28956707_28958876	34	49	23	55
chr10_28965410_28969784	337	323	133	377
chr10_29010164_29011923	23	16	7	32
chr10_29698303_29699611	40	36	18	42
chr10_29921839_29923278	11	8	2	12
chr10_30023059_30026447	128	119	52	128
chr10_30347194_30348817	39	34	14	38
chr10_30636205_30638727	400	369	121	410
chr10_30721806_30725107	121	139	46	173
chr10_31072826_31074610	40	31	16	42
chr10_31319917_31321596	37	27	10	31
chr10_31606853_31610487	179	135	60	204
chr10_31891558_31892879	39	37	11	49
chr10_32047792_32050033	77	69	28	92
chr10_32215612_32219142	266	274	92	323
chr10_32340964_32346158	447	423	152	498
chr10_32633635_32637535	332	366	118	334
chr10_32665255_32668820	197	157	74	215
chr10_32734520_32736214	61	41	18	81
chr10_33239490_33240756	6	9	3	13
chr10_33243868_33249211	359	316	121	353
chr10_33269203_33270484	15	13	7	28
chr10_33622768_33626668	75	66	27	138
chr10_35101800_35106057	262	290	108	348
chr10_35378109_35380357	234	186	63	258
chr10_35414791_35417834	159	147	55	175
chr10_35484209_35485472	20	17	4	13
chr10_35624064_35627573	276	266	100	315
chr10_35926143_35933531	169	156	56	265
chr10_36147256_36148344	24	15	7	24
chr10_38145029_38147501	117	94	29	107
chr10_38264348_38265863	44	38	13	61
chr10_38298635_38301162	107	123	33	113
chr10_38382912_38384438	18	20	3	10
chr10_38644888_38646540	86	76	28	90
chr10_38690566_38692942	128	124	49	130
chr10_42384261_42387943	328	306	267	287
chr10_42390426_42395103	274	214	199	215
chr10_42399539_42400970	67	75	88	58
chr10_42599211_42600351	150	131	123	122
chr10_43047368_43049186	43	57	26	79
chr10_43132385_43135099	95	100	40	101
chr10_43277166_43279688	190	201	84	215
chr10_43331872_43333137	8	15	6	14
chr10_43428387_43429828	12	14	11	20
chr10_43571628_43573676	32	31	18	47
chr10_43600113_43601477	18	10	3	17
chr10_43632798_43635144	118	127	48	148
chr10_43697549_43699680	92	75	44	105
chr10_43724411_43725999	18	17	13	29
chr10_43761700_43763036	15	14	12	25
chr10_43799816_43800932	15	11	4	15
chr10_43817856_43819450	10	15	11	21
chr10_43856605_43858658	28	24	16	41
chr10_43889375_43894025	312	281	111	329
chr10_43900160_43905131	354	316	92	312
chr10_43915758_43916806	9	14	5	8
chr10_43931160_43933599	82	59	45	88
chr10_43950121_43951728	23	14	8	21
chr10_44069175_44070448	13	23	13	20
chr10_44101603_44103033	32	32	16	36
chr10_44143279_44144920	43	41	20	39
chr10_44185135_44186683	13	4	7	21
chr10_44787876_44789545	15	9	0	13
chr10_44877597_44881793	101	103	39	116
chr10_45373991_45375334	11	7	6	9
chr10_45453837_45455967	60	64	17	76
chr10_45469681_45471387	15	22	10	32
chr10_45495807_45497787	72	72	20	61
chr10_45857381_45858396	16	8	8	14
chr10_45868291_45870404	22	16	10	32
[truncated: 15,355 more rows]

## Sheet: K27me3_peaks
Figure 4D-H3K27me3 nChIP-seq read counts in the peaks
	Hap_1	Hap_2	STITCH_1	STITCH_2
chr1_794185_811114	304	263	266	281
chr1_817772_827411	131	116	117	104
chr1_828851_830754	27	27	18	27
chr1_832508_843854	274	259	259	285
chr1_845527_880784	1164	969	1122	1211
chr1_894724_897962	37	48	48	42
chr1_900071_912022	296	281	315	285
chr1_915116_954525	813	646	813	788
chr1_969165_976127	102	85	145	124
chr1_992169_1007538	283	214	272	297
chr1_1034545_1036943	25	21	33	32
chr1_1051999_1058821	104	70	80	86
chr1_1071492_1074298	31	35	38	33
chr1_1078446_1080091	20	16	21	9
chr1_1091124_1092335	16	16	11	13
chr1_1097182_1100295	43	31	36	25
chr1_1108347_1112847	63	60	60	57
chr1_1134868_1143782	127	144	137	92
chr1_1180995_1184093	43	37	34	34
chr1_1209832_1212926	28	30	33	34
chr1_1287921_1291285	43	30	61	34
chr1_1514536_1521475	73	82	78	70
chr1_1530367_1540692	134	131	168	186
chr1_1565985_1567925	44	23	32	17
chr1_1838084_1840014	19	24	23	15
chr1_1842352_1843571	8	6	14	14
chr1_1851184_1852382	10	14	17	14
chr1_1890378_1893725	25	30	31	28
chr1_1931641_1935568	26	42	31	51
chr1_1948356_1953191	77	75	69	77
chr1_1974362_1980939	84	86	89	83
chr1_2047889_2049292	12	14	21	17
chr1_2137050_2138480	15	16	26	15
chr1_2348103_2350883	27	21	24	32
chr1_2373030_2381077	156	132	135	108
chr1_2457945_2477797	570	493	526	493
chr1_2555340_2562887	192	172	174	178
chr1_2568429_2572071	43	45	45	50
chr1_2928123_2932068	58	55	47	45
chr1_2969717_2972298	30	26	30	27
chr1_2973925_2994996	720	568	687	686
chr1_3019907_3024464	60	47	45	40
chr1_3090856_3092506	12	10	14	16
chr1_3117627_3121422	22	37	23	37
chr1_3140131_3142271	12	18	26	8
chr1_3156277_3160429	45	60	39	26
chr1_3161513_3166947	116	111	104	108
chr1_3196215_3203926	81	105	94	89
chr1_3214557_3220168	53	67	53	55
chr1_3224817_3236681	341	334	290	387
chr1_3258849_3263105	31	32	35	41
chr1_3268816_3271145	32	36	32	28
chr1_3283761_3287660	32	44	26	43
chr1_3290412_3294961	34	55	36	42
chr1_3299078_3318699	887	830	924	1029
chr1_3335362_3339181	27	42	45	31
chr1_3364214_3366944	20	31	15	34
chr1_3403951_3405268	7	13	17	21
chr1_3442624_3454038	156	116	169	140
chr1_3528321_3530970	46	41	43	38
chr1_3534260_3537855	43	45	37	41
chr1_3564323_3591050	546	434	497	542
chr1_3592981_3594032	18	7	5	16
chr1_3598900_3603682	63	61	84	87
chr1_3605173_3609925	56	29	53	35
chr1_3611627_3618787	99	54	87	77
chr1_3623827_3638720	153	123	204	162
chr1_3643791_3649192	67	30	59	59
chr1_3664921_3668706	49	42	42	61
chr1_3676276_3678513	26	17	12	30
chr1_3685773_3688329	34	19	29	31
chr1_3827652_3828837	16	6	18	9
chr1_4644312_4645778	13	23	21	11
chr1_4659322_4660581	16	9	17	12
chr1_4709176_4721827	276	248	251	218
chr1_4743398_4747077	39	37	34	31
chr1_4769958_4774893	83	93	53	75
chr1_4812453_4815079	14	31	21	13
chr1_5266064_5267564	15	18	8	10
chr1_5277177_5292199	340	393	328	379
chr1_5325752_5327389	16	21	12	19
chr1_5540970_5542364	19	20	11	19
chr1_5671884_5674289	23	22	21	23
chr1_5687307_5688943	10	8	16	18
chr1_5737635_5738772	7	18	4	15
chr1_5745278_5748283	31	26	34	20
chr1_5776603_5778047	16	18	10	10
chr1_5805754_5807706	17	23	22	15
chr1_5809234_5810597	14	18	11	14
chr1_5825319_5830318	45	53	44	29
chr1_5906341_5907788	13	22	16	20
chr1_5958533_5959702	15	13	7	10
chr1_6049108_6051467	20	31	26	22
chr1_6053833_6056195	36	30	37	46
chr1_6061667_6064936	31	40	38	20
chr1_6084274_6085518	6	5	16	13
chr1_6092522_6095842	45	39	44	46
chr1_6112873_6114426	19	21	7	13
chr1_6185358_6190523	67	50	73	62
chr1_6201828_6204532	21	29	36	33
chr1_6205849_6210474	95	76	84	101
chr1_6219069_6223288	34	28	31	36
chr1_6235242_6243403	183	170	198	164
chr1_6263319_6274631	191	140	167	172
chr1_6302435_6304945	67	35	47	60
chr1_6306655_6313089	188	114	149	161
chr1_6317117_6324309	94	72	102	84
chr1_6454364_6457914	32	40	22	34
chr1_6464889_6466412	26	10	19	9
chr1_6471173_6491077	680	573	573	629
chr1_6493606_6495339	25	15	18	16
chr1_6496322_6502962	112	109	101	106
chr1_6508820_6510087	9	18	21	23
chr1_6526255_6527523	17	11	10	21
chr1_6555395_6560182	68	60	81	59
chr1_6623129_6627237	59	48	56	35
chr1_6671285_6673066	34	24	35	20
chr1_6762071_6763684	26	20	19	22
chr1_6794418_6797090	32	27	37	34
chr1_7020204_7022045	11	20	25	16
chr1_7130652_7135209	51	45	51	49
chr1_7257685_7259416	18	12	17	23
chr1_7594998_7598595	27	27	38	37
chr1_7729605_7732133	15	17	37	31
chr1_7737410_7746375	107	99	102	105
chr1_7760834_7768923	102	98	116	115
chr1_7844309_7846239	35	26	34	28
chr1_7942328_7943999	12	20	17	15
chr1_7998056_8004833	148	150	137	145
chr1_8086480_8088067	31	17	21	25
chr1_8277853_8281287	41	61	43	52
chr1_8376305_8380295	61	57	66	60
chr1_8967182_8969082	13	19	10	18
chr1_9063840_9065480	17	23	26	21
chr1_9186335_9189258	49	34	42	45
chr1_9241366_9245803	84	64	81	65
chr1_9251931_9268451	400	419	391	419
chr1_9295419_9296934	17	15	15	11
chr1_9340229_9342348	16	25	20	22
chr1_9350095_9355834	100	85	91	90
chr1_9381102_9382540	26	14	17	18
chr1_9553968_9556877	55	51	63	33
chr1_9617095_9619761	31	24	41	30
chr1_9686401_9689436	52	53	37	36
chr1_9709766_9715168	95	102	82	92
chr1_9746192_9752156	100	79	85	79
chr1_9881802_9887590	98	78	85	93
chr1_9894563_9897567	19	27	26	38
chr1_10054610_10061135	177	160	142	157
chr1_10268834_10270106	22	15	4	16
chr1_10587212_10589240	37	28	18	32
chr1_10696075_10702750	124	151	126	155
chr1_10706942_10713427	123	82	127	104
chr1_10721722_10725585	33	42	47	42
chr1_10748521_10773891	489	389	441	412
chr1_10779114_10780473	5	6	18	15
chr1_10792362_10799306	82	64	72	83
chr1_10801676_10804250	27	29	32	46
chr1_10815897_10817965	25	18	19	26
chr1_10847439_10863577	243	238	254	247
chr1_10868609_10870187	18	13	20	16
chr1_10889627_10898458	96	69	100	80
chr1_10917592_10931193	278	253	243	232
chr1_10947371_10952564	114	124	97	117
chr1_10958357_10962463	43	29	43	34
chr1_10972988_10974476	16	19	8	11
chr1_10999025_11004130	55	52	57	54
chr1_11016188_11020861	68	48	59	62
chr1_11038230_11040079	23	12	21	23
chr1_11097804_11098819	6	14	15	9
chr1_11536077_11541426	87	66	80	73
chr1_11605831_11609644	56	28	39	42
chr1_11615229_11618154	27	34	26	30
chr1_11705652_11717186	174	134	166	168
chr1_11721184_11724357	38	31	35	33
chr1_11752130_11753629	18	21	16	11
chr1_11793968_11795686	13	11	22	19
chr1_11819322_11824561	130	97	106	119
chr1_11916507_11923189	109	102	91	111
chr1_11957054_11961217	48	32	55	54
chr1_12119584_12125609	87	98	117	99
chr1_12212389_12213752	12	17	16	16
chr1_12214957_12216463	11	18	6	14
chr1_12221025_12230697	135	169	143	133
chr1_12598324_12602203	21	29	47	42
chr1_13834619_13847782	291	260	295	291
chr1_13907895_13909722	16	11	25	29
chr1_14015454_14016788	15	18	9	5
chr1_14019473_14029547	125	121	92	143
chr1_14044325_14055746	318	301	279	379
chr1_14072945_14078656	73	65	65	65
chr1_14131165_14132620	17	18	10	9
chr1_14167822_14173936	111	95	89	130
chr1_14209760_14226110	318	316	262	300
chr1_14229350_14230630	18	17	14	9
chr1_14626493_14628589	15	22	13	24
chr1_14633195_14634573	13	14	15	5
chr1_14774166_14776269	16	30	23	13
chr1_14789568_14791080	19	15	15	5
chr1_14795951_14798806	33	32	22	20
chr1_14911540_14913641	18	20	25	21
chr1_14915691_14922373	91	102	97	101
chr1_14925695_14930062	80	80	60	75
chr1_15058459_15067070	99	139	126	114
chr1_15249295_15254626	100	113	99	109
chr1_15424525_15428200	57	33	41	32
chr1_15476736_15479227	33	29	34	32
chr1_15597951_15599212	17	9	18	13
chr1_15704066_15718193	260	255	235	299
chr1_15720043_15721478	8	8	17	16
chr1_15727264_15729042	20	6	15	18
chr1_15733280_15739405	75	84	68	85
chr1_15930355_15933473	60	35	45	52
chr1_16081252_16084577	33	28	42	31
chr1_16286480_16290003	35	36	43	47
chr1_16323613_16325322	7	8	17	16
chr1_16347954_16352255	48	33	49	44
chr1_16354082_16355371	21	6	10	20
chr1_16395457_16403999	142	149	148	127
chr1_16482787_16485170	37	39	29	34
chr1_16487285_16488814	20	26	13	18
chr1_16542602_16557272	269	265	260	250
chr1_16561959_16563509	22	15	17	20
chr1_16690611_16692546	21	25	28	27
chr1_16826367_16828076	26	17	27	24
chr1_16835665_16840132	66	79	79	77
chr1_16847716_16849769	40	26	26	36
chr1_16852448_16864127	399	284	362	366
chr1_16876126_16877459	34	39	35	35
chr1_16885246_16894235	182	148	160	142
chr1_16919132_16924882	106	92	80	94
chr1_16926400_16948045	719	680	617	747
chr1_16969521_16981016	513	425	382	349
chr1_17012911_17042675	881	824	813	806
chr1_17043828_17058135	225	234	229	213
chr1_17082743_17094220	472	420	380	397
chr1_17096623_17102219	203	200	178	213
chr1_17105607_17109679	117	103	93	100
chr1_17185027_17186170	35	22	38	30
chr1_17197005_17212996	461	400	407	411
chr1_17213465_17218209	63	49	65	61
chr1_17238819_17240278	20	12	22	29
chr1_17440487_17450740	145	142	162	147
chr1_17561142_17562907	7	20	7	20
chr1_17566201_17569382	19	22	37	32
chr1_17685821_17687754	20	24	14	28
chr1_17701438_17705672	38	34	58	53
chr1_17707714_17712381	42	50	35	39
chr1_17766499_17769166	30	36	31	33
chr1_17793226_17795081	12	24	19	27
chr1_18082226_18083424	21	9	14	8
chr1_18085330_18087205	29	16	21	16
chr1_18215348_18218938	51	44	41	31
chr1_18221480_18231837	140	103	103	103
chr1_18249455_18251635	31	14	27	29
chr1_18257198_18258447	20	8	7	14
chr1_18262509_18265819	40	32	38	41
chr1_18277840_18279357	19	17	14	14
chr1_18284546_18290096	59	60	66	68
chr1_18302199_18303443	17	12	10	16
chr1_18318117_18319524	17	8	10	17
chr1_18321509_18323066	19	19	17	17
chr1_18342890_18351699	75	93	78	86
chr1_18352163_18361093	114	87	98	102
chr1_18363114_18364163	8	14	15	11
chr1_18379072_18385125	68	53	64	72
chr1_18390020_18395650	88	59	64	65
chr1_18399316_18404069	38	49	39	43
chr1_18408294_18411849	45	23	26	44
chr1_18412623_18418405	59	73	51	64
chr1_18421987_18443535	340	247	267	304
chr1_18583844_18586113	27	32	24	22
chr1_18645860_18650542	49	50	40	65
chr1_18699730_18702788	42	28	29	35
chr1_18711063_18716353	39	49	52	66
chr1_18721409_18724169	12	25	19	35
chr1_18727918_18731277	27	20	25	44
chr1_18755639_18758474	35	35	14	32
chr1_18784708_18787741	32	27	22	38
chr1_18850143_18854155	46	27	37	37
chr1_18855735_18867912	103	128	137	109
chr1_18869724_18872259	29	23	22	28
chr1_18874494_18879953	42	59	39	64
chr1_18883178_18887790	67	62	49	72
chr1_18893223_18896111	24	23	20	32
chr1_18906254_18907787	22	16	11	15
chr1_18912820_18914973	32	17	16	25
chr1_18919559_18922082	33	23	32	32
chr1_18923675_18935838	140	138	139	160
chr1_18936226_18992173	1826	1547	1604	1906
chr1_18994219_19015574	378	395	377	424
chr1_19017126_19025647	137	103	82	118
chr1_19028474_19037070	114	97	94	126
chr1_19038991_19054359	309	265	231	334
chr1_19058127_19060202	18	25	10	23
chr1_19065760_19068453	31	25	21	34
chr1_19072154_19083237	136	128	133	128
chr1_19084654_19085968	21	13	14	11
chr1_19089542_19094261	51	58	47	53
chr1_19096066_19102599	75	81	60	91
chr1_19103579_19113564	126	119	103	116
chr1_19115634_19117921	20	20	32	31
chr1_19141550_19148721	139	139	129	151
chr1_19157778_19163101	63	59	56	57
chr1_19166024_19170802	49	53	43	52
chr1_19171530_19182418	151	95	103	101
chr1_19227300_19228395	19	12	11	16
chr1_19229910_19231080	8	13	15	15
chr1_19279377_19287769	112	123	113	116
chr1_19289531_19294354	36	40	45	51
chr1_19296200_19297752	19	15	8	13
chr1_19307181_19310799	25	49	21	28
chr1_19319848_19321707	19	23	23	10
chr1_19322766_19324934	22	14	27	23
chr1_19613305_19617764	104	81	72	102
chr1_19916325_19919958	40	32	42	37
chr1_19966539_19974162	177	175	169	158
chr1_19988669_19996206	148	172	163	154
chr1_20000600_20003418	25	32	50	41
chr1_20103384_20115715	197	249	216	247
chr1_20123426_20130598	102	114	91	110
chr1_20149742_20152547	28	25	35	35
chr1_20293521_20295093	4	17	15	14
chr1_20314367_20315806	19	21	14	17
chr1_20439402_20441049	23	10	16	10
chr1_20503584_20516833	109	133	156	117
chr1_20519529_20521455	16	27	8	24
chr1_20535130_20537983	28	20	38	23
chr1_20547862_20555469	96	94	113	110
chr1_20559566_20563449	26	43	30	32
chr1_20566447_20569451	35	20	35	39
chr1_20576339_20577802	16	10	18	19
chr1_20602798_20605245	18	38	33	28
chr1_20609641_20611551	16	16	21	31
chr1_20614863_20620285	56	63	72	75
chr1_20622636_20624169	10	12	19	22
chr1_20653220_20654591	9	5	13	15
chr1_20668251_20674850	71	72	69	80
chr1_20683373_20707957	378	365	388	402
chr1_20709408_20749232	735	665	731	779
chr1_20751888_20754416	36	21	26	19
chr1_20758332_20759812	19	11	18	12
chr1_20762015_20763427	20	17	15	17
chr1_20780329_20782588	17	31	23	22
chr1_20785477_20789035	33	37	35	39
chr1_20790162_20797602	97	85	86	89
chr1_20802977_20811881	156	122	153	167
chr1_20813664_20819862	107	104	96	127
chr1_20835475_20840589	63	60	62	72
chr1_20843591_20847229	39	42	38	42
chr1_20855361_20886270	541	518	498	568
chr1_20887578_20889264	21	18	21	19
chr1_20895413_20899592	40	43	42	39
chr1_20958122_20959759	24	21	24	25
chr1_21042583_21048225	65	49	56	68
chr1_21054403_21062532	138	161	173	145
chr1_21503603_21505424	17	18	29	24
chr1_21508237_21523938	418	426	430	523
chr1_21525489_21528743	23	33	19	23
chr1_21669722_21674501	71	60	77	80
chr1_21724407_21726429	22	22	13	24
chr1_21737105_21739838	42	34	42	41
chr1_21740308_21741920	22	29	14	24
chr1_21752442_21754832	84	48	64	71
chr1_21759202_21769172	153	153	169	134
chr1_21822570_21823970	20	18	15	17
chr1_21833026_21835626	52	39	40	53
chr1_21906197_21913445	67	78	85	66
chr1_21915275_21919216	24	24	46	25
chr1_21945835_21951026	58	61	60	59
chr1_21976665_21978390	21	12	25	21
chr1_21984935_21989579	69	51	57	70
chr1_21991183_21998759	86	53	83	89
chr1_22459340_22463041	48	34	41	38
chr1_22465862_22473451	116	129	126	119
chr1_22531694_22538383	80	71	49	58
chr1_22572767_22581994	87	99	102	109
chr1_22600464_22603464	32	39	35	42
chr1_22614197_22615855	20	6	24	9
chr1_22644014_22646598	24	35	33	39
chr1_22674917_22679697	75	61	62	71
chr1_22824268_22828694	59	74	55	91
chr1_22871731_22876526	65	68	51	73
chr1_22879102_22894007	209	179	205	227
chr1_22919887_22921828	16	24	19	32
chr1_22931062_22937163	69	72	51	84
chr1_22951974_22954603	33	24	39	32
chr1_22971265_22972702	17	16	8	21
chr1_22993835_22995621	16	10	20	17
chr1_23035265_23041606	94	83	95	109
chr1_23278650_23282216	51	56	10	14
chr1_23291669_23292959	16	21	9	9
chr1_23294474_23296618	26	21	17	34
chr1_23500031_23507222	149	156	139	126
chr1_23509690_23511496	28	25	17	20
chr1_23542494_23546793	61	65	55	49
chr1_23587172_23589129	18	23	22	14
chr1_23671211_23756774	2735	2639	2573	3120
chr1_23763982_23765251	17	14	12	10
chr1_23807713_23810191	27	24	30	32
chr1_23811472_23815497	49	43	51	62
chr1_23815772_23817564	23	18	20	19
chr1_23854601_23861415	92	107	102	109
chr1_23879460_23880752	18	15	22	13
chr1_23916031_23917621	10	14	7	18
chr1_23944910_23948278	61	51	40	41
chr1_23961879_23963098	9	16	16	9
chr1_23999589_24001880	29	24	27	30
chr1_24004996_24006587	12	17	25	14
chr1_24009031_24010170	9	14	14	19
chr1_24128032_24129578	19	19	19	13
chr1_24163512_24165452	55	36	46	54
chr1_24166995_24168602	18	15	13	20
chr1_24192078_24197506	102	90	84	111
chr1_24227190_24233173	107	98	99	122
chr1_24437736_24439934	20	19	13	26
chr1_24643750_24656814	222	218	211	196
chr1_24659654_24660931	19	15	12	11
chr1_24879735_24885362	92	78	73	81
chr1_24936195_24937409	13	12	15	17
chr1_25174909_25177450	29	43	52	61
chr1_25224325_25226102	9	8	19	17
chr1_25248957_25264011	565	477	516	590
chr1_25295736_25297682	16	29	17	25
chr1_25332827_25334504	24	13	19	12
chr1_25378848_25382589	47	27	36	25
chr1_25406129_25407716	15	14	21	23
chr1_25748033_25751425	52	59	50	52
chr1_25753442_25756563	46	35	30	30
chr1_25867412_25869905	11	24	21	27
chr1_25926260_25928774	23	19	25	22
chr1_25935127_25948165	174	129	148	188
chr1_25966280_25968734	31	28	28	43
chr1_26107571_26108937	21	20	14	9
chr1_26125286_26126291	14	14	6	17
chr1_26147282_26150461	55	39	30	41
chr1_26200262_26206726	82	83	82	64
chr1_26233570_26236298	28	25	28	39
chr1_26245925_26253705	87	63	93	84
chr1_26259355_26260665	6	15	11	17
chr1_26297545_26299519	18	23	23	24
chr1_26357982_26364918	109	99	103	112
chr1_26367761_26382128	314	319	259	342
chr1_26383090_26386156	25	31	23	43
chr1_26390985_26392225	10	15	4	16
chr1_26409767_26412163	29	26	20	36
chr1_26419465_26421368	20	16	21	34
chr1_26435264_26437326	37	30	40	18
chr1_26469972_26496270	519	455	446	463
chr1_26549010_26555048	87	57	79	91
chr1_26663316_26664877	22	12	18	20
chr1_26684619_26692440	122	94	110	117
chr1_26853887_26856050	24	22	27	18
chr1_26942666_26946630	49	34	52	45
chr1_27002095_27004157	15	9	29	27
chr1_27019950_27022154	30	19	26	33
chr1_27189774_27191348	41	23	28	29
chr1_27317323_27319396	25	27	19	27
chr1_27562062_27563622	22	25	23	23
chr1_27636642_27641641	51	53	33	41
chr1_27645826_27647567	18	15	19	26
chr1_27667368_27669963	35	27	20	20
chr1_27674425_27677793	41	41	40	48
chr1_27683126_27690215	169	141	164	147
chr1_27707108_27709830	54	31	38	33
chr1_27941563_27943314	19	21	26	15
chr1_27956310_27963962	135	132	117	151
chr1_27986876_27988501	15	17	19	21
chr1_27995882_27997951	44	42	28	43
chr1_28050757_28051965	16	11	15	13
chr1_28199418_28200529	17	14	9	11
chr1_28241403_28245986	73	72	76	65
chr1_28908398_28909796	15	13	28	25
chr1_28916909_28920809	43	47	51	57
chr1_29136423_29141964	119	142	130	109
chr1_29208929_29215853	81	78	72	82
chr1_29238546_29243239	49	48	41	49
chr1_29446539_29450805	62	54	35	45
chr1_29451694_29454809	24	21	36	37
chr1_29557724_29566927	145	144	136	125
chr1_29582637_29588473	73	80	86	75
chr1_29660628_29662254	22	17	9	16
chr1_29669432_29672086	28	24	13	29
chr1_29676474_29680426	42	43	34	33
chr1_29684765_29688248	31	41	24	30
chr1_29697514_29699041	24	15	8	18
chr1_29749833_29751272	19	12	14	11
chr1_29758658_29759890	10	9	15	15
chr1_29802415_29806781	34	31	58	56
chr1_30162541_30165170	38	28	22	26
chr1_30234389_30235685	5	15	8	14
chr1_30403235_30405804	33	11	22	19
chr1_30439422_30445644	64	52	67	79
chr1_30600024_30602186	24	11	19	22
chr1_30814109_30815344	19	10	14	14
chr1_31155151_31160299	53	39	61	49
chr1_31273261_31277577	26	38	40	36
chr1_31294430_31300430	63	70	68	62
chr1_31313478_31320005	99	81	76	83
chr1_31379454_31384620	45	36	39	49
chr1_31710578_31714668	69	51	75	66
chr1_31844155_31845483	23	7	9	19
chr1_31866113_31870142	48	52	44	46
chr1_31882401_31885940	34	40	36	44
chr1_31933135_31935486	24	18	21	26
chr1_32053070_32057671	69	57	57	40
chr1_32080427_32085510	73	92	96	62
chr1_32185460_32188479	18	36	24	20
chr1_32227105_32233700	67	57	68	62
chr1_32234306_32244719	213	220	197	206
chr1_32404362_32406039	21	24	28	20
chr1_32408368_32409742	19	23	15	17
chr1_32667003_32670846	52	36	51	53
chr1_32706752_32708347	22	23	22	20
chr1_32801896_32804532	28	22	25	37
chr1_32810986_32817239	89	76	100	94
chr1_32822476_32827678	52	45	59	64
chr1_32876845_32879864	35	23	21	31
chr1_33003096_33007507	58	48	45	51
chr1_33165664_33172871	111	99	99	107
chr1_33198812_33204260	55	48	65	50
chr1_33205200_33207153	39	31	23	25
chr1_33333152_33338543	145	129	124	121
chr1_33342356_33343718	22	17	9	16
chr1_33349090_33358849	143	159	146	164
chr1_33362569_33378296	260	204	207	249
chr1_33383038_33386977	37	36	35	48
chr1_33387333_33396535	270	243	237	295
chr1_33427452_33429271	25	21	16	36
chr1_33431447_33438833	170	140	153	167
chr1_33445581_33447907	18	28	20	23
chr1_33502467_33507481	65	60	51	60
chr1_33536397_33537673	14	12	8	18
chr1_33545062_33554380	161	142	156	174
chr1_33557075_33562655	45	45	38	60
chr1_33566301_33568780	17	23	17	31
chr1_33571667_33572963	18	8	15	14
chr1_33580456_33585475	41	52	61	60
chr1_33587390_33589216	11	24	13	24
chr1_33645029_33646079	15	15	9	6
chr1_33648068_33649367	11	12	15	8
chr1_33652383_33654904	25	24	19	39
chr1_33657403_33660477	43	41	24	32
chr1_33669621_33671575	20	14	14	24
chr1_33675542_33678259	18	34	19	22
chr1_33690147_33691396	16	14	7	14
chr1_33700520_33702251	11	19	16	32
chr1_33704526_33706305	17	26	17	15
chr1_33711046_33721029	102	140	87	122
chr1_33804872_33806013	16	18	9	11
chr1_33808466_33827599	353	381	300	354
chr1_33827743_33829137	10	12	20	21
chr1_33831672_33836999	66	47	59	78
chr1_33842784_33846640	51	43	42	39
chr1_33892000_33902177	145	123	150	143
chr1_33906513_33909771	40	20	25	35
chr1_33933180_33936000	24	31	31	17
chr1_34098776_34101041	27	31	28	28
chr1_34635049_34636744	19	11	17	21
chr1_34640914_34644117	44	46	43	34
chr1_34696702_34700767	42	38	25	29
chr1_34726896_34738712	153	146	106	133
chr1_34754057_34756304	23	26	28	17
chr1_34794634_34798637	39	41	23	35
chr1_34799837_34802270	24	19	25	22
chr1_34808536_34809850	14	15	11	15
chr1_34821558_34823024	23	14	14	7
chr1_34876068_34878929	32	18	18	35
chr1_34885681_34887179	15	18	9	17
chr1_34893239_34895561	19	20	15	27
chr1_34910044_34911544	22	18	10	12
chr1_34911604_34912923	11	6	14	14
chr1_34962715_34965307	23	23	13	24
chr1_35066599_35069378	30	24	19	31
chr1_35117869_35119135	18	15	10	14
chr1_35122785_35125181	24	33	16	23
chr1_35131466_35132639	11	16	15	7
chr1_35154330_35155708	12	17	11	15
chr1_35168161_35172266	36	44	29	67
chr1_35178890_35180407	8	16	15	14
chr1_35207182_35208735	18	20	20	15
chr1_35213768_35216333	17	27	18	30
chr1_35235518_35237736	22	25	24	28
chr1_35243661_35250011	125	91	92	88
chr1_35256515_35264157	83	76	86	78
chr1_35327499_35333682	79	53	60	53
chr1_35348572_35353149	78	71	57	59
chr1_35390202_35399962	151	122	110	116
chr1_35502748_35504683	16	19	21	14
chr1_36032732_36047771	526	445	473	564
chr1_36109638_36113004	40	46	45	32
chr1_36114694_36121893	92	87	78	92
chr1_36149098_36154521	59	44	54	41
chr1_36155358_36158283	17	45	28	31
chr1_36163997_36169404	76	80	72	73
chr1_36170653_36177993	90	98	100	75
chr1_36271395_36275777	43	43	36	34
chr1_36587826_36592618	99	102	95	92
chr1_36617035_36621311	97	98	107	114
chr1_36784763_36788334	30	27	39	32
chr1_36789829_36791796	10	13	21	26
chr1_36797061_36799084	27	22	15	23
chr1_36930379_36940663	155	167	168	200
chr1_36944234_36947277	30	22	28	27
chr1_36956034_36960000	35	32	46	38
chr1_36998525_37001369	16	23	32	21
chr1_37017432_37021458	51	68	40	51
chr1_37029799_37031899	25	11	18	20
chr1_37046140_37048212	26	20	20	24
chr1_37051266_37059641	91	73	81	77
chr1_37064270_37066383	24	20	22	29
chr1_37068833_37069894	16	9	14	4
chr1_37110146_37112209	26	25	16	24
chr1_37115029_37117656	23	20	25	33
chr1_37126377_37128263	17	19	12	19
chr1_37155660_37159184	38	37	35	46
chr1_37169601_37171471	24	20	19	12
chr1_37187583_37190454	33	31	24	23
chr1_37238288_37240063	23	28	20	17
chr1_37290646_37292198	23	15	9	19
chr1_37492364_37510295	368	300	334	362
chr1_37538810_37543961	45	58	30	37
chr1_37551917_37556631	42	60	36	34
chr1_37607372_37611433	40	31	26	46
chr1_37625999_37627771	13	11	19	23
chr1_37698795_37703637	52	43	50	46
chr1_37705293_37711113	66	72	58	64
chr1_37717699_37722462	59	41	23	53
chr1_37753550_37756718	37	42	21	16
chr1_37771297_37773071	8	22	20	22
chr1_37778251_37788394	135	151	120	154
chr1_37797117_37800245	29	37	22	28
chr1_37836374_37838430	16	14	24	22
chr1_37937553_37941643	55	46	59	56
chr1_37980852_37983041	33	28	29	31
chr1_38063135_38067386	40	41	43	49
chr1_38069052_38076361	98	92	86	116
chr1_38078118_38115307	865	840	791	938
chr1_38119195_38120845	6	19	17	14
chr1_38121424_38128269	75	75	86	75
chr1_38132164_38135753	35	41	50	37
chr1_38141665_38143322	13	15	11	16
chr1_38193950_38195714	18	20	20	23
chr1_38196745_38208845	140	126	126	136
chr1_38213252_38238990	598	558	530	605
chr1_38241729_38249422	93	68	71	53
chr1_38252971_38262754	195	166	186	190
chr1_38508720_38516399	122	77	106	115
chr1_38526605_38528002	14	7	14	23
chr1_38530038_38531595	14	24	15	17
chr1_38589002_38591345	16	31	17	22
chr1_38596913_38611034	182	196	151	181
chr1_38616141_38623701	82	94	66	91
chr1_38649590_38651246	14	23	10	23
chr1_38658576_38660659	13	25	19	30
chr1_38668498_38672140	31	42	47	30
chr1_38678540_38682698	41	41	33	33
chr1_38683253_38689796	65	69	83	81
chr1_38699661_38703828	36	46	36	30
chr1_38707756_38712524	36	48	57	46
chr1_38714529_38721797	68	69	76	70
chr1_38725414_38732554	87	84	60	73
chr1_38746454_38747877	13	16	19	11
chr1_38754538_38756746	21	27	22	26
chr1_38758414_38763106	33	29	45	37
chr1_38787717_38789388	14	15	21	16
chr1_38816077_38818111	17	15	18	29
chr1_38820630_38822898	17	22	25	33
chr1_38936365_38944753	110	103	126	114
chr1_38946271_38948650	31	14	23	20
chr1_38952391_38954714	25	21	26	32
chr1_38957807_38958908	8	16	14	10
chr1_38970121_38972171	22	24	22	19
chr1_38975101_38977009	19	23	23	25
chr1_38981556_38983967	23	21	25	29
chr1_38998836_39001579	23	33	22	35
chr1_39005661_39008795	45	28	41	38
chr1_39013145_39017499	40	33	38	59
chr1_39025155_39029106	61	65	62	64
chr1_39037177_39047503	196	191	161	179
chr1_39052685_39056430	37	34	37	40
chr1_39059125_39077085	364	417	359	382
chr1_39079366_39080977	12	14	21	18
chr1_39086678_39091172	47	54	48	57
chr1_39092099_39093698	21	16	14	11
chr1_39104461_39107371	19	27	21	34
chr1_39133461_39134936	13	14	20	17
chr1_39163317_39164404	15	16	8	5
chr1_39187675_39188939	13	15	12	15
chr1_39190320_39195809	39	51	49	58
chr1_39197918_39200980	23	34	34	25
chr1_39211103_39214524	34	37	38	32
chr1_39230941_39232214	12	18	11	18
chr1_39263821_39266026	18	28	26	18
chr1_39266782_39288662	462	465	396	478
chr1_39290104_39292718	23	30	18	28
chr1_39296211_39298268	14	29	19	13
chr1_39543936_39552176	102	94	72	99
chr1_39951987_39961109	220	200	208	212
chr1_39978982_39980833	96	66	61	99
chr1_40044074_40045122	6	13	12	15
chr1_40056619_40064158	101	71	89	99
chr1_40067231_40071801	48	36	44	63
chr1_40073109_40077476	90	79	77	83
chr1_40085218_40091881	87	63	74	71
chr1_40094736_40204062	3287	3261	3047	3684
chr1_40244864_40265842	412	408	394	412
chr1_40280217_40282107	21	13	14	21
chr1_40294379_40296620	17	15	26	22
chr1_40355717_40357072	9	14	19	5
chr1_40365474_40366777	20	15	5	18
chr1_40368347_40371833	60	62	66	72
chr1_40406304_40409551	27	38	32	37
chr1_40418334_40420685	42	44	40	53
chr1_40562806_40564359	19	13	20	12
chr1_40609797_40614990	81	56	54	68
chr1_40620480_40623295	30	23	22	38
chr1_40777439_40788297	259	237	240	239
chr1_40839906_40841348	21	27	21	18
chr1_40974620_40976223	25	29	14	21
chr1_40993896_40995542	22	18	13	21
chr1_41245650_41252502	110	118	138	107
chr1_41265414_41268220	39	36	44	36
chr1_41281851_41285872	50	43	44	47
chr1_41312133_41313522	18	3	7	14
chr1_41323123_41327581	75	74	81	64
chr1_41348096_41354522	114	104	77	76
chr1_41415773_41418435	24	36	30	30
chr1_41488082_41492302	61	45	67	71
chr1_41703683_41713304	126	106	106	115
chr1_41748315_41761248	162	139	106	141
chr1_41778369_41782642	58	48	61	46
chr1_41821942_41867115	707	616	652	686
chr1_41870771_41877252	64	72	76	76
chr1_41879810_41881147	15	13	8	19
chr1_41952192_41955108	49	33	34	37
chr1_41960379_41965635	38	49	67	60
chr1_41982002_41983758	30	17	25	14
chr1_42028842_42031474	24	27	22	29
chr1_42124544_42132570	164	143	156	154
chr1_42200659_42204194	37	41	35	18
chr1_42378330_42385966	165	143	151	164
chr1_42494994_42504625	142	123	128	145
chr1_42581568_42583349	20	18	18	7
chr1_42815440_42817423	28	19	20	8
chr1_42835750_42837686	23	23	20	23
chr1_42843368_42844958	23	12	15	20
chr1_42846557_42849209	53	76	52	72
chr1_42918906_42921537	23	16	14	29
chr1_43116354_43120118	42	38	42	44
chr1_43121288_43123596	28	20	32	16
chr1_43254575_43255982	20	10	4	16
chr1_43363080_43366192	28	30	16	29
chr1_43476771_43478083	6	13	19	14
chr1_43483778_43485234	12	15	18	24
chr1_43486172_43491495	41	60	38	61
chr1_43523282_43526012	25	34	26	16
chr1_43528934_43534553	55	62	64	62
chr1_43637919_43640505	50	27	37	36
chr1_43691850_43693025	11	8	15	14
chr1_43732727_43733891	4	18	15	4
chr1_43812273_43814388	43	36	31	53
chr1_43919880_43925465	67	57	73	57
chr1_43931366_43933259	22	15	18	25
chr1_43936123_43937694	11	21	12	24
chr1_43958096_43961860	24	32	41	47
chr1_43970626_43973653	31	23	24	34
chr1_43984499_43990066	53	55	70	62
chr1_43994900_43996439	26	21	19	28
chr1_44110424_44112080	17	20	18	15
chr1_44396607_44399060	46	28	31	26
chr1_44493565_44495215	13	19	17	19
chr1_44506795_44520065	103	96	122	147
chr1_44521835_44524055	22	19	23	30
chr1_44526216_44527774	20	15	19	27
chr1_44532185_44534183	25	18	20	15
chr1_44634096_44636253	16	25	18	16
chr1_44653233_44655101	22	14	12	22
chr1_44673277_44677364	57	47	40	44
chr1_44794396_44796232	13	17	20	35
chr1_44828063_44834585	70	80	65	87
chr1_44834864_44837131	20	22	25	20
chr1_44842220_44847253	59	57	47	61
chr1_44852574_44856950	40	46	39	64
chr1_44859896_44865403	40	73	68	52
chr1_44865435_44869380	48	34	25	24
chr1_44872781_44886348	232	230	232	232
chr1_44961333_44966528	56	54	61	77
chr1_44969356_44973259	54	57	51	50
chr1_44979388_44983201	34	39	33	47
chr1_45009651_45012156	21	31	30	25
chr1_45026758_45033929	104	110	92	124
chr1_45081408_45085130	45	31	51	38
chr1_45248654_45252187	36	44	52	28
chr1_45306640_45311180	66	54	55	50
chr1_45668098_45675982	178	193	182	166
chr1_45677737_45680442	38	20	31	25
chr1_45681660_45683517	20	21	8	14
chr1_45953994_45955950	24	21	23	17
chr1_46267357_46268903	29	12	18	16
chr1_46508053_46511120	28	27	39	28
chr1_46595418_46597728	46	36	28	61
chr1_46599247_46603463	35	44	37	61
chr1_46631054_46636965	114	96	82	93
chr1_46646150_46649280	39	36	38	50
chr1_46858865_46863344	69	79	71	68
chr1_46894987_46907295	150	107	111	105
chr1_46909124_46969639	2001	1750	1678	2031
chr1_46972254_47019063	1040	987	960	1015
chr1_47021771_47026326	32	29	33	50
chr1_47068128_47069903	18	25	19	23
chr1_47082396_47085832	62	47	63	60
chr1_47134482_47135917	13	17	20	13
chr1_47202899_47204176	8	9	13	20
chr1_47207193_47209619	26	18	18	26
chr1_47214919_47216399	4	16	13	15
chr1_47487423_47491413	54	43	32	43
chr1_47531644_47533502	13	21	12	24
chr1_47643457_47648901	73	59	72	70
chr1_47652540_47655246	23	27	22	36
chr1_47657657_47667250	135	117	114	135
chr1_47668219_47712612	1391	1234	1226	1385
chr1_47852147_47856524	58	42	44	66
chr1_47858466_47860802	21	23	27	32
chr1_47862954_47871752	124	99	73	104
chr1_47873921_47929665	1974	1713	1922	2169
chr1_47930868_47932646	26	14	16	20
chr1_47936949_47944445	78	64	79	91
chr1_47948398_47950221	32	23	14	22
chr1_47951576_47956365	55	60	40	52
chr1_47957734_47964859	77	100	87	103
chr1_47966063_47994638	513	475	440	489
chr1_47996991_48004337	87	68	84	77
chr1_48014852_48026824	136	105	117	133
chr1_48027173_48034179	80	88	69	52
chr1_48035436_48040501	46	56	46	61
chr1_48052956_48063789	182	156	163	195
chr1_48081471_48083195	18	23	18	18
chr1_48085126_48090126	57	63	68	63
chr1_48090698_48092892	26	20	24	18
chr1_48096218_48099852	37	34	27	40
chr1_48103521_48108334	50	44	52	51
chr1_48114547_48116069	17	17	7	17
chr1_48118882_48120191	11	20	8	15
chr1_48123046_48126815	43	61	35	39
chr1_48127501_48129948	32	16	23	16
chr1_48130982_48132415	18	18	13	17
chr1_48140481_48146649	67	55	50	66
chr1_48149230_48150685	17	14	15	18
chr1_48153211_48156452	37	32	44	34
chr1_48166503_48206310	745	666	663	772
chr1_48209101_48216397	84	84	71	65
chr1_48227582_48229747	29	20	20	26
chr1_48233985_48236175	24	20	30	17
chr1_48385747_48386916	4	16	7	14
chr1_48413350_48415689	24	25	28	32
chr1_48450052_48456002	78	84	102	109
chr1_48460127_48467294	123	104	114	127
chr1_48469342_48475493	77	91	59	60
chr1_48478979_48484150	40	61	63	47
chr1_48490259_48493238	28	28	19	39
chr1_48505998_48508813	33	33	34	38
chr1_48514436_48516608	32	23	17	27
chr1_48518532_48529977	116	150	116	138
chr1_48531142_48534023	36	28	23	32
chr1_48538403_48539513	9	18	14	11
chr1_48557824_48559098	18	18	8	14
chr1_48561879_48564921	24	41	30	27
chr1_48594411_48595491	14	12	13	14
chr1_48936005_48937214	9	7	19	15
chr1_49146236_49147509	10	14	4	17
chr1_49243371_49244869	16	16	12	17
chr1_49819753_49824919	82	86	99	151
chr1_50488162_50492253	66	69	52	53
chr1_50512017_50516456	81	71	77	79
chr1_50574426_50577037	33	22	28	48
chr1_50719645_50724553	58	40	41	43
chr1_50731023_50736184	58	51	58	45
chr1_50746164_50750577	40	32	44	57
chr1_50795844_50804441	143	111	94	119
chr1_50831077_50838484	98	120	110	108
chr1_50842745_50844981	18	30	19	24
chr1_50875605_50902646	1244	1039	1173	1329
chr1_51427691_51451905	1164	1018	1016	1217
chr1_51699956_51701747	31	20	11	22
chr1_51794927_51797433	20	31	25	24
chr1_51808221_51810848	44	49	39	43
chr1_52456547_52458789	35	24	35	27
chr1_52564143_52565781	16	15	17	13
chr1_52593392_52594751	16	17	4	19
chr1_52604996_52607481	45	32	36	40
chr1_53064915_53070399	134	124	100	108
chr1_53077277_53078587	17	13	10	10
chr1_53095196_53104779	241	259	225	258
chr1_53126247_53127518	7	15	6	16
chr1_53306086_53311656	126	124	112	178
chr1_53384412_53396404	248	223	215	257
chr1_53407022_53408278	19	18	22	15
chr1_53523319_53532186	233	204	179	212
chr1_53547824_53549263	5	16	9	20
chr1_53647196_53655356	72	57	70	89
chr1_53658664_53662371	41	41	60	51
chr1_53808067_53812412	48	48	46	38
chr1_53833216_53834882	23	20	15	12
chr1_53840234_53843459	47	31	28	40
chr1_53846899_53848559	23	12	15	23
chr1_53855478_53856826	19	15	11	16
chr1_53859946_53873882	139	127	156	120
chr1_53874237_53879964	44	57	72	67
chr1_53919073_53920551	13	15	21	19
chr1_53927793_53930196	22	19	30	29
chr1_53931834_53934386	17	21	32	21
chr1_53936145_53938128	25	34	24	27
chr1_53941671_53943236	22	9	16	16
chr1_53945900_53947270	23	20	9	14
chr1_53991409_53993789	32	30	33	25
chr1_54015912_54019807	38	31	38	52
chr1_54022967_54026502	43	39	30	33
chr1_54027195_54029082	15	10	18	19
chr1_54058255_54061700	47	42	41	36
chr1_54071105_54074432	38	43	32	35
chr1_54098934_54100834	20	24	20	22
chr1_54107288_54109911	11	25	31	16
chr1_54144349_54155727	146	112	172	155
chr1_54184306_54186735	23	27	12	18
chr1_54192562_54197911	47	53	28	50
chr1_54198963_54209079	262	286	248	294
chr1_54356090_54357839	17	22	20	14
chr1_54445632_54449706	38	35	30	30
chr1_54586207_54589761	46	42	61	55
chr1_54936977_54940687	45	46	51	74
chr1_54942204_54947948	62	90	56	76
chr1_54949720_54953756	55	63	43	62
chr1_54956512_54957936	16	19	18	21
chr1_54962563_54965158	30	31	26	29
chr1_55114538_55117446	20	17	33	28
chr1_55173667_55175026	16	17	22	13
chr1_55175785_55181126	67	39	44	60
chr1_55239762_55251943	210	217	189	199
chr1_55255333_55256431	17	14	5	8
chr1_55264628_55266474	21	23	20	25
chr1_55278001_55281958	32	29	41	50
chr1_55410994_55412336	12	15	11	15
chr1_55443414_55448384	67	84	77	100
chr1_55461326_55473542	221	279	186	229
chr1_55478962_55480813	25	19	16	14
chr1_55501810_55507785	106	120	116	134
chr1_55681924_55683654	25	27	21	12
chr1_55788709_55792938	40	46	45	43
chr1_55993299_55999714	68	82	49	56
chr1_56182591_56184388	21	21	16	17
chr1_56451287_56454675	31	46	41	38
chr1_56899566_56905496	55	66	75	63
chr1_56942095_56947419	54	64	37	59
chr1_57102722_57113267	135	114	141	152
chr1_57262205_57264040	25	15	16	21
chr1_57287045_57288106	19	10	11	17
chr1_57306846_57309004	21	23	15	28
chr1_57341917_57343515	17	16	14	21
chr1_57398518_57401187	17	37	27	18
chr1_57511725_57514540	12	21	30	23
chr1_57659409_57675609	262	381	274	289
chr1_57876932_57878411	17	16	9	11
chr1_57884667_57887528	52	55	43	56
chr1_57889908_57892609	38	52	40	65
chr1_57915184_57921500	53	80	66	90
chr1_58140240_58149401	130	140	139	155
chr1_58256922_58258578	10	15	13	16
chr1_58370625_58374045	34	45	29	39
chr1_58459424_58461834	11	34	12	22
chr1_58473854_58475593	16	26	10	18
chr1_58709416_58717453	128	118	123	129
chr1_58723957_58725579	19	10	19	19
chr1_58762829_58764329	14	15	10	19
chr1_58776078_58777221	8	4	16	14
chr1_59037373_59046006	158	152	144	152
chr1_59081446_59083277	20	17	12	16
chr1_59239953_59241845	15	25	12	22
chr1_59242841_59248888	63	67	59	67
chr1_59251279_59253744	32	27	20	33
chr1_59258630_59261180	20	25	31	28
chr1_59277366_59281046	48	61	47	38
chr1_59301268_59304115	23	23	32	17
chr1_59324275_59325802	13	18	13	17
chr1_59326441_59328706	23	19	29	17
chr1_59349264_59350996	16	16	14	21
chr1_59355807_59359855	38	46	29	36
chr1_59368436_59371776	32	38	26	39
chr1_59439294_59440430	13	14	9	13
chr1_59450414_59452147	14	11	19	19
chr1_59457920_59459202	19	15	15	7
chr1_59479949_59482395	32	23	24	38
chr1_59491094_59494853	30	25	17	37
chr1_59510714_59511914	15	17	16	6
chr1_59611067_59614538	56	46	30	32
chr1_59760310_59761926	21	25	29	18
chr1_59906068_59907903	17	22	16	20
chr1_60223986_60225363	10	7	18	16
chr1_60390525_60394796	84	87	71	98
chr1_60441017_60442959	28	25	17	27
chr1_60536548_60542352	43	71	54	58
chr1_61417745_61419140	11	13	17	19
chr1_61434043_61441865	84	98	66	66
chr1_61465756_61471019	64	52	61	65
chr1_61472244_61475605	38	40	24	35
chr1_61507055_61514787	144	116	115	121
chr1_61516336_61524623	345	299	295	392
chr1_61534319_61553435	498	422	391	462
chr1_61718487_61719862	16	10	14	10
chr1_61754580_61755697	16	9	6	15
chr1_61853199_61861724	121	112	98	136
chr1_61919426_61920620	9	15	17	10
chr1_61925471_61931623	64	93	60	58
chr1_61936143_61950973	431	484	366	495
chr1_61954480_61957409	28	35	19	24
chr1_62056042_62057960	25	28	15	18
chr1_62105201_62106932	13	12	22	29
chr1_62523024_62524871	22	26	14	16
chr1_62744831_62760043	346	362	290	371
chr1_62763957_62769474	63	87	67	74
chr1_62775169_62779015	40	42	22	36
chr1_62780999_62788494	192	188	146	200
chr1_62792202_62796726	34	53	38	64
chr1_63222566_63225227	37	61	42	41
chr1_63342787_63345199	29	9	20	12
chr1_63351082_63352973	18	25	7	26
chr1_63379462_63385414	49	65	52	55
chr1_63534946_63542659	114	126	119	111
chr1_63591795_63593644	16	13	19	16
chr1_63659807_63668970	191	218	186	207
chr1_63783746_63786857	73	57	35	41
chr1_63789809_63800039	193	215	181	208
chr1_63830824_63832935	27	31	27	33
chr1_64055510_64062206	103	83	110	111
chr1_64208558_64210124	11	18	7	25
chr1_64211966_64215335	22	38	32	39
chr1_64524320_64529262	44	62	49	46
chr1_64776097_64777663	8	16	19	17
chr1_64821503_64825536	34	57	52	57
chr1_64915593_64917665	17	24	8	20
chr1_64930036_64935510	85	69	77	92
chr1_64971888_64977065	45	94	72	81
chr1_65202195_65206547	71	46	51	64
chr1_65208094_65210066	27	25	28	29
chr1_65426154_65434706	122	114	119	115
chr1_65445990_65449613	31	33	16	39
chr1_65465803_65472335	208	195	184	206
chr1_65510693_65512082	17	14	20	8
chr1_65535129_65536683	16	16	7	25
chr1_65539678_65541270	26	11	15	20
chr1_65606780_65613418	99	95	89	89
chr1_65616554_65618048	10	20	15	6
chr1_65718769_65724491	81	79	73	77
chr1_65726849_65734093	94	99	92	98
chr1_65742662_65744857	18	33	36	25
chr1_65772183_65775001	63	78	63	80
chr1_65776097_65778327	19	16	26	22
chr1_65910543_65912205	14	22	13	25
chr1_65988280_65994221	130	131	119	111
chr1_66254926_66262498	217	241	225	254
chr1_66463115_66476320	310	340	308	415
chr1_66724121_66726913	39	29	17	36
chr1_66996434_67002057	84	80	86	96
chr1_67215537_67219627	56	54	64	60
chr1_67374619_67377440	23	28	25	24
chr1_67483257_67489437	55	84	65	87
chr1_67517069_67519313	25	32	42	38
chr1_67613651_67616001	25	17	16	24
chr1_67768880_67776093	125	134	115	122
chr1_67782094_67784483	19	25	25	28
chr1_67925593_67928117	25	29	20	24
chr1_67966092_67972054	73	96	59	78
chr1_67973808_67993634	455	548	471	538
chr1_68090237_68092311	10	7	17	21
chr1_68295670_68301461	99	94	82	124
chr1_68514121_68519125	64	52	80	73
chr1_68615794_68619073	23	46	24	35
chr1_68673326_68678586	44	55	33	41
chr1_68683493_68714514	675	704	620	713
chr1_68736427_68750751	298	311	255	300
chr1_68754861_68771223	328	325	304	388
chr1_68772947_68774102	11	9	16	13
chr1_68784586_68790534	66	66	56	50
chr1_68794331_68799569	46	61	36	41
chr1_69079698_69084464	22	63	36	45
chr1_69707843_69711810	38	39	35	35
chr1_70029790_70038447	208	193	198	209
chr1_71170283_71172014	19	22	12	14
chr1_71511992_71515711	86	82	72	71
chr1_71547611_71551844	42	44	35	54
chr1_71705613_71706832	10	15	10	16
chr1_71856671_71861066	41	69	41	44
chr1_71924205_71931274	63	106	64	87
chr1_72745732_72747770	31	24	14	32
chr1_72750512_72752346	23	30	21	20
chr1_74709052_74713186	52	68	47	68
chr1_75137875_75141709	58	57	52	74
chr1_75297478_75300899	30	31	41	45
chr1_75545265_75552543	60	73	95	85
chr1_75591723_75607118	635	509	516	664
chr1_76076650_76084740	158	137	124	165
chr1_76537931_76541697	40	42	50	45
chr1_76867960_76872355	38	50	33	56
chr1_77317888_77325091	91	83	99	97
chr1_77330125_77336807	96	90	69	77
chr1_77728778_77734573	95	66	102	102
chr1_77743399_77748013	115	114	98	113
chr1_78507588_78514631	118	110	110	121
chr1_78693563_78709260	458	326	442	548
chr1_78717105_78719944	20	32	35	33
chr1_78732798_78735014	32	27	18	14
chr1_78953782_78967254	206	214	233	257
chr1_79119210_79124421	75	84	74	68
chr1_81482229_81490479	182	168	224	244
chr1_82071732_82077833	68	82	78	90
chr1_82263138_82265171	15	19	17	34
chr1_82270662_82271796	8	15	3	16
chr1_82588702_82590517	8	24	20	19
chr1_82618541_82622502	30	49	28	45
chr1_84462139_84470049	142	172	153	170
chr1_84486238_84501141	288	386	283	352
chr1_84921172_84924060	28	19	27	30
chr1_84929172_84931933	38	30	19	39
chr1_84934943_84944705	175	171	175	194
chr1_85183512_85185048	16	16	15	15
chr1_85229661_85233783	38	63	33	38
chr1_85238462_85240930	20	32	22	30
chr1_85356122_85362807	119	131	110	104
chr1_85459711_85467957	257	215	206	255
chr1_85509121_85517268	174	237	190	196
chr1_85528369_85529904	12	24	22	24
chr1_85927964_85932755	53	86	71	84
chr1_85934406_85939543	55	56	50	72
chr1_85981458_85984580	34	39	22	30
chr1_85986512_86004512	206	202	168	193
chr1_86016732_86019586	23	24	34	29
chr1_86040330_86045358	67	73	71	72
chr1_86060936_86070804	111	159	99	143
chr1_86617245_86624683	148	166	153	152
chr1_87168253_87169788	30	26	22	14
chr1_87578566_87583679	59	65	54	70
chr1_87595764_87600554	78	70	65	79
chr1_87613395_87619759	65	75	76	89
chr1_87655822_87657502	18	21	13	23
chr1_87797992_87799235	14	20	14	9
chr1_88148136_88155686	109	155	76	87
chr1_88925389_88928808	31	42	33	27
chr1_90095051_90103885	134	139	162	142
chr1_90223587_90231681	136	117	131	131
chr1_90252304_90253472	16	6	7	16
chr1_90270672_90277872	108	72	84	104
chr1_90284947_90286211	17	22	22	19
chr1_90409942_90411592	19	12	16	31
chr1_90546198_90547714	9	15	7	20
chr1_90951404_90958367	76	83	77	91
chr1_90973566_90975042	14	15	9	17
chr1_91000324_91005492	54	68	61	61
chr1_91017297_91019363	18	28	14	30
chr1_91023172_91029756	81	133	98	101
chr1_91165127_91207603	1996	1709	1796	2030
chr1_91209636_91210665	15	12	9	16
chr1_91215972_91220172	38	48	48	27
chr1_91226893_91229993	29	21	26	36
chr1_91245440_91249736	50	44	38	27
chr1_91251322_91253501	26	26	17	26
chr1_91265618_91267118	21	20	15	18
chr1_91268746_91280037	204	258	223	224
chr1_91281190_91285632	46	40	53	48
chr1_91286669_91320611	1111	1020	1027	1223
chr1_91493724_91495217	8	15	17	17
chr1_91498034_91504751	78	115	90	89
chr1_91517433_91522136	57	47	39	60
chr1_91598729_91599968	7	19	13	16
chr1_92348813_92354053	128	109	88	143
chr1_92493453_92497870	71	50	59	59
chr1_92938642_92958762	694	631	578	697
chr1_93248846_93253667	39	48	50	35
chr1_93425101_93426518	15	9	20	20
chr1_93428323_93431845	49	53	36	54
chr1_93435082_93440163	57	67	53	92
chr1_94143891_94151029	111	101	85	79
chr1_94310502_94311845	18	15	23	21
chr1_94313488_94314873	17	13	14	8
chr1_94372940_94374625	13	20	24	19
chr1_94452123_94453551	10	17	10	13
chr1_94455502_94456532	14	9	4	12
chr1_94471899_94483047	113	141	148	118
chr1_94512114_94513786	22	16	19	15
chr1_94515090_94517924	23	25	31	41
chr1_94520331_94524328	48	41	44	47
chr1_94527037_94554107	565	542	538	664
chr1_94565383_94573907	88	96	72	107
chr1_94576040_94587593	156	198	172	193
chr1_94699355_94707208	226	173	171	192
chr1_94709232_94734991	804	786	684	883
chr1_94735632_94741375	71	70	48	51
chr1_94744805_94747600	39	32	32	16
chr1_94792468_94797169	47	57	43	48
chr1_94806212_94808475	25	17	15	28
chr1_94815009_94818856	44	41	48	32
chr1_94819633_94821718	15	24	22	23
chr1_94884936_94887299	17	27	18	29
chr1_95004874_95011192	91	111	79	102
chr1_95086217_95092965	74	87	59	84
chr1_95159154_95161031	13	19	22	14
chr1_95284181_95287831	35	36	43	39
chr1_95538806_95540087	7	20	14	12
chr1_95583766_95585758	25	22	17	19
chr1_95696936_95698981	27	14	27	35
chr1_96931626_96934584	29	46	26	31
chr1_96936209_96951920	355	507	361	512
chr1_98383537_98388903	66	70	65	52
chr1_98507110_98521411	442	402	418	514
chr1_98667596_98673970	73	110	94	101
chr1_98922919_98924654	18	18	20	12
chr1_99127878_99129496	27	20	8	15
chr1_99467921_99473797	69	80	60	79
chr1_99727467_99732448	114	86	66	64
chr1_100314084_100315342	13	14	20	10
chr1_101000387_101008827	239	266	207	268
chr1_101309494_101318257	168	119	191	220
chr1_101699563_101704403	105	68	76	95
chr1_101776872_101782050	35	31	63	50
chr1_101948978_101951835	25	14	36	36
chr1_102460689_102463326	29	32	29	32
chr1_102519911_102521629	16	20	9	20
chr1_104481178_104487774	122	122	132	190
chr1_105028143_105035787	180	231	247	258
chr1_106627605_106636121	133	152	132	148
chr1_107680369_107682261	27	27	13	24
chr1_108504390_108507152	39	57	48	64
chr1_108743225_108745253	24	18	29	21
chr1_109202326_109206511	79	87	84	63
chr1_109287297_109289209	30	26	24	33
chr1_109419848_109421963	30	32	28	36
chr1_109582072_109583189	17	10	8	15
chr1_109648322_109660464	245	248	267	247
chr1_109788428_109794603	78	85	84	76
chr1_109985488_109989829	38	64	24	37
chr1_110002069_110015538	235	239	199	243
chr1_110017238_110018630	14	17	15	19
chr1_110021535_110025968	50	38	45	63
chr1_110048955_110058101	139	147	126	115
chr1_110058516_110060172	22	12	21	32
chr1_110061009_110066470	56	67	51	51
chr1_110082941_110084554	15	20	19	15
chr1_110184597_110186432	36	16	22	16
chr1_110193058_110199295	84	78	64	91
chr1_110257588_110259249	16	9	16	23
chr1_110262688_110264576	25	14	23	10
chr1_110271773_110275806	43	27	36	53
chr1_110279493_110285441	131	140	139	143
chr1_110294111_110295855	18	20	11	17
chr1_110313707_110317685	39	48	47	43
chr1_110333990_110337866	29	40	24	49
chr1_110364917_110367946	20	32	15	35
chr1_110414885_110416165	14	8	11	14
chr1_110448228_110459519	189	180	209	225
chr1_110486785_110489726	26	19	28	43
chr1_110495856_110511109	330	276	333	334
chr1_110512329_110514190	19	21	20	18
chr1_110520586_110522618	20	19	12	20
chr1_110524960_110527129	28	22	12	26
chr1_110605619_110637204	874	824	797	954
chr1_110637513_110640945	33	46	31	22
chr1_110642609_110644901	28	23	17	20
chr1_110651503_110659201	79	83	86	75
chr1_110669605_110676589	112	103	96	111
chr1_110679784_110700892	509	457	412	483
chr1_110724894_110728211	22	40	33	28
chr1_110750157_110756830	91	64	77	89
chr1_110783793_110788978	65	49	51	65
chr1_110801539_110805636	57	64	65	52
chr1_110855696_110857168	16	18	8	19
chr1_111060948_111062549	20	22	12	3
chr1_111063555_111070776	87	83	74	76
chr1_111072301_111075429	39	22	24	34
chr1_111082449_111084726	20	23	23	36
chr1_111085844_111087809	24	21	25	18
chr1_111092870_111104464	178	183	186	180
chr1_111112639_111124457	187	176	185	221
chr1_111129613_111135968	76	62	66	59
chr1_111136826_111141951	60	59	42	75
chr1_111144875_111160467	357	333	361	364
chr1_111161889_111169274	104	97	78	93
chr1_111212172_111220979	271	218	199	234
chr1_111221970_111225038	39	30	34	54
chr1_111259834_111263155	32	39	33	35
chr1_111272880_111279504	59	71	54	55
chr1_111285654_111287528	26	21	19	18
chr1_111300084_111301886	13	31	14	17
chr1_111308930_111311503	26	27	23	34
chr1_111320957_111324144	52	38	25	36
chr1_111354922_111360075	54	34	50	49
chr1_111743849_111751167	168	143	130	132
chr1_111754830_111757433	15	38	24	22
chr1_111810160_111814956	44	48	42	46
chr1_111971848_111973104	19	10	8	14
chr1_111974775_111979231	48	26	42	53
chr1_112058522_112060048	21	21	16	14
chr1_112082630_112084876	21	37	16	19
chr1_112283021_112286906	48	49	46	62
chr1_112392336_112394861	31	17	18	31
chr1_112412300_112415782	31	40	27	35
chr1_112429143_112430685	18	18	20	16
chr1_112435762_112437609	14	26	10	18
chr1_112441338_112442666	13	18	10	14
chr1_112444594_112451263	87	115	90	103
chr1_112516149_112518115	12	19	14	17
chr1_112525512_112538225	200	214	189	199
chr1_112554400_112556183	18	15	17	22
chr1_112679870_112682335	35	32	19	29
chr1_112728332_112729380	16	13	6	7
chr1_112848342_112850432	24	21	17	23
chr1_112866320_112869590	48	43	32	34
chr1_112901315_112902675	15	16	10	16
chr1_112911275_112914467	48	22	26	30
chr1_113005309_113011277	82	96	69	82
chr1_113037842_113040446	31	34	28	31
chr1_113041497_113057174	428	403	387	445
chr1_113060994_113062556	21	15	16	21
chr1_113217973_113220465	50	40	31	28
chr1_113241415_113242877	18	17	15	23
chr1_113244952_113247591	21	27	27	47
chr1_113248300_113252606	62	32	36	42
chr1_113255451_113267433	174	178	164	177
chr1_113268670_113273557	39	51	39	50
chr1_113276261_113277380	9	10	13	15
chr1_113283890_113291980	126	152	99	93
chr1_113299624_113300684	11	16	11	17
chr1_113335480_113337055	27	21	24	25
chr1_113391231_113393818	21	25	33	27
chr1_113817861_113824070	79	88	68	80
chr1_113930782_113932521	21	11	21	15
chr1_113933836_113936613	67	48	43	49
chr1_114464644_114467565	38	27	24	33
chr1_114469761_114471613	22	22	20	23
chr1_114531934_114534402	18	36	20	29
chr1_114540712_114542057	15	16	17	15
chr1_114552211_114554071	13	17	20	28
chr1_114571658_114572763	11	14	10	16
chr1_114583689_114591674	84	91	83	95
chr1_114593145_114594233	15	6	10	13
chr1_114596771_114600961	42	45	55	51
chr1_114625039_114630543	46	42	51	62
chr1_114656980_114658341	10	16	15	7
chr1_114695784_114705370	143	125	135	155
chr1_114707192_114711303	42	38	32	44
chr1_114714370_114716846	21	29	33	19
chr1_114718652_114719800	5	12	12	17
chr1_114732031_114734960	24	38	26	31
chr1_114737508_114741574	45	46	35	46
chr1_114748605_114756853	85	95	85	103
chr1_114769118_114773703	50	36	46	48
chr1_114773797_114775301	14	17	16	15
chr1_114790328_114793775	25	28	34	39
chr1_114802976_114806223	27	33	38	32
chr1_114807758_114815818	81	91	48	63
chr1_114826817_114828261	18	6	12	18
chr1_114862276_114863932	20	20	8	14
chr1_114875456_114877078	13	16	21	18
chr1_114887954_114891287	44	34	40	25
chr1_115055280_115058026	34	20	26	29
chr1_115208858_115215622	97	70	81	75
chr1_115218742_115220830	28	23	19	29
chr1_115323699_115327344	45	29	57	60
chr1_115655478_115657081	13	19	13	26
chr1_115875072_115890440	216	207	204	222
chr1_116105165_116108799	94	80	78	52
chr1_116185735_116187340	13	18	22	14
chr1_116189278_116191021	14	23	14	17
chr1_116368172_116373071	84	72	74	80
chr1_116376823_116384975	176	136	143	141
chr1_116452792_116457153	48	46	31	52
chr1_116693430_116696437	39	30	33	44
chr1_116708223_116713098	65	91	70	76
chr1_116875991_116877933	17	22	16	22
chr1_116913062_116915326	33	32	29	39
chr1_116964233_116965849	21	20	9	11
chr1_117075663_117077499	16	21	17	22
chr1_117113849_117116181	28	29	25	27
chr1_117207362_117212788	81	75	62	79
chr1_117218675_117220704	20	20	15	23
chr1_117453246_117454894	12	24	10	21
chr1_117573451_117576937	36	19	20	38
chr1_117666295_117669139	16	41	23	21
chr1_117887397_117892308	70	53	61	71
chr1_117907120_117908943	29	31	22	26
chr1_117910529_117912163	24	22	14	25
chr1_118145785_118153376	125	110	101	118
chr1_118154956_118159622	51	47	63	50
chr1_118197950_118200360	22	24	29	38
chr1_118249804_118251107	13	18	17	25
chr1_118299311_118301154	28	12	15	15
chr1_119292897_119301608	150	173	146	171
chr1_119501270_119506463	59	64	44	48
chr1_119511274_119514857	51	38	32	21
chr1_119515651_119556827	2015	1673	1737	2087
chr1_119715032_119718943	46	47	52	56
chr1_119829275_119830667	13	7	15	18
chr1_119837897_119839573	21	18	9	14
chr1_119860238_119862057	19	20	20	27
chr1_119866891_119872288	64	69	46	48
chr1_119877926_119883215	44	76	36	46
chr1_119956989_119958547	11	13	17	22
chr1_119964455_119969477	36	37	64	43
chr1_120114646_120115954	22	8	9	17
chr1_120193287_120194636	21	9	20	14
chr1_120219956_120221798	12	16	21	20
chr1_120308895_120313256	55	51	45	48
chr1_120349160_120351694	34	35	25	24
chr1_120353609_120354622	15	12	10	6
chr1_120357815_120359639	14	19	18	26
chr1_120383079_120384369	17	10	9	18
chr1_120425928_120427932	30	14	23	28
chr1_120437438_120441801	69	97	64	81
chr1_120585497_120589184	145	163	166	170
chr1_120608529_120616384	320	302	312	380
chr1_120671731_120683892	677	608	651	747
chr1_121134830_121139430	229	269	204	260
chr1_121261884_121263009	10	14	9	13
chr1_121357273_121358655	39	27	27	32
chr1_121482399_121485788	8265	6815	7835	8766
chr1_144006567_144008700	38	20	18	15
chr1_144009391_144011638	20	30	15	30
chr1_144526810_144531640	80	60	79	64
chr1_144539431_144540496	20	23	24	42
chr1_144593561_144608225	628	738	640	818
chr1_144852305_144866646	185	182	168	163
chr1_144867512_144883463	218	186	169	199
chr1_144884633_144887677	41	27	39	26
chr1_144890475_144894464	56	45	40	49
chr1_144928757_144934815	111	85	81	103
chr1_144937755_144944399	72	75	63	68
chr1_144947968_144949468	18	19	15	10
chr1_144965907_144967033	40	47	27	33
chr1_144986023_145049467	2031	1935	1743	1881
chr1_145053728_145092803	1469	1526	1319	1522
chr1_145097134_145118953	396	412	361	408
chr1_145121616_145125280	66	82	53	58
chr1_145128313_145135508	198	212	178	243
chr1_145137256_145149408	703	698	739	880
chr1_145190919_145192821	59	58	57	59
chr1_145204183_145216242	533	510	504	607
chr1_145234418_145236402	67	86	95	91
chr1_145264253_145265265	19	22	14	21
chr1_145288466_145293842	114	103	115	110
chr1_145410866_145418906	188	158	190	152
chr1_145450904_145453478	31	36	23	21
chr1_145468670_145483679	560	465	473	525
chr1_145529805_145531566	24	17	15	10
chr1_145537497_145539914	39	26	26	26
chr1_145547785_145552739	86	88	91	108
chr1_145555461_145564612	158	141	128	120
chr1_145589837_145591253	14	15	18	20
chr1_145712386_145715772	54	39	68	56
chr1_145732952_145735455	19	35	21	33
chr1_146007635_146008923	55	39	37	45
chr1_146514061_146517761	23	22	42	39
chr1_146541617_146558716	782	659	632	803
chr1_146577846_146582052	34	44	38	31
chr1_146648255_146651526	69	61	31	33
chr1_146657760_146659630	22	18	16	24
chr1_146694085_146699043	66	72	55	68
chr1_146712256_146714224	15	34	23	21
chr1_146992279_146994028	9	22	11	18
chr1_146996788_147000075	26	39	23	32
chr1_147055191_147064191	140	132	152	138
chr1_147067026_147070815	28	23	38	31
chr1_147140633_147141747	8	10	14	22
chr1_147172961_147175820	25	25	23	32
chr1_147220912_147223387	21	26	13	20
chr1_147248500_147250131	11	24	18	14
chr1_147252483_147254747	15	26	13	26
chr1_147306629_147311370	50	49	61	62
chr1_147742535_147745826	29	27	28	46
chr1_147764824_147765838	8	10	16	13
chr1_147776098_147794796	546	467	486	491
chr1_147813964_147815115	16	10	7	17
chr1_147817766_147819322	17	14	16	19
chr1_147820371_147832026	266	230	233	263
chr1_148192403_148194227	49	48	46	30
chr1_148353659_148355827	119	107	142	127
chr1_148358258_148361478	142	171	147	150
chr1_148527592_148528646	62	67	52	59
chr1_148549252_148550620	39	48	35	59
chr1_148555776_148562516	278	312	272	354
chr1_148564795_148567343	100	87	94	87
chr1_148845769_148859750	647	628	497	541
chr1_148863292_148868545	245	230	170	224
chr1_148897404_148913072	744	708	607	697
chr1_148915676_148953473	1593	1404	1408	1658
chr1_149119343_149120649	20	6	16	5
chr1_149135040_149174580	807	616	333	376
chr1_149185876_149196893	313	271	160	214
chr1_149200383_149202421	27	25	7	18
chr1_149203428_149205170	17	19	14	24
chr1_149207742_149211547	52	36	25	24
chr1_149215533_149218633	37	37	25	20
chr1_149220604_149228781	135	125	137	114
chr1_149229699_149235944	112	101	83	77
chr1_149283774_149292491	544	475	424	521
chr1_149299013_149301152	89	82	83	78
chr1_149305876_149307487	38	49	30	34
chr1_149309341_149314206	97	101	69	72
chr1_149331878_149336732	151	150	119	140
chr1_149400556_149402273	51	36	39	41
chr1_149671281_149675360	274	226	247	267
chr1_149717714_149721418	80	102	71	54
chr1_149906912_149908456	12	9	16	18
chr1_150118827_150122138	32	47	34	45
chr1_150255472_150257037	29	27	33	35
chr1_150517669_150524529	85	78	90	81
chr1_151101696_151107552	88	68	67	64
chr1_151116599_151121660	81	51	60	72
chr1_151434124_151435922	19	18	24	20
chr1_151444495_151448432	38	40	34	50
chr1_151564463_151566602	30	17	35	20
chr1_151686614_151702813	334	271	295	325
chr1_151721783_151723226	18	13	8	12
chr1_151800129_151801174	18	8	9	12
chr1_151809165_151814935	109	83	147	120
chr1_151816532_151819282	26	28	24	35
chr1_151822128_151826418	56	60	24	41
chr1_151828125_151838442	244	248	276	278
chr1_151844029_151845108	13	13	6	18
chr1_151963323_151967736	46	56	58	41
chr1_152008416_152016171	102	118	77	87
chr1_152079196_152086715	173	141	67	57
chr1_152950477_152953265	27	28	27	33
chr1_153226665_153228068	18	13	11	17
chr1_153230482_153238872	230	221	183	226
chr1_153249075_153250458	18	11	12	17
chr1_153252123_153253452	15	15	14	11
chr1_153306225_153307499	15	5	15	6
chr1_153374187_153377694	63	63	56	71
chr1_153390768_153394515	42	30	29	42
chr1_153396034_153398898	31	38	31	28
chr1_153483666_153492544	139	168	157	133
chr1_153498079_153499680	24	18	18	18
chr1_153503277_153510699	105	107	113	111
chr1_153519530_153523436	25	43	32	26
chr1_153539402_153542863	32	33	37	33
chr1_153598479_153599685	14	13	13	16
chr1_153650131_153654056	56	42	26	25
chr1_154164899_154167733	27	34	22	20
chr1_154295037_154297171	23	22	28	18
chr1_154323566_154327175	47	35	44	44
chr1_154374808_154381131	136	135	135	159
chr1_154399086_154405787	46	56	46	76
chr1_154470866_154478676	218	248	218	218
chr1_154481509_154482664	18	13	4	9
chr1_154699479_154700925	8	15	18	16
chr1_154726726_154727946	15	8	14	13
chr1_154730654_154734641	55	64	50	41
chr1_154775925_154780599	44	53	25	33
chr1_154833997_154844460	175	152	182	182
chr1_154845808_154848776	27	19	33	27
chr1_154861244_154862556	15	16	7	17
chr1_154907681_154909052	20	20	14	15
chr1_154969891_154971484	23	18	22	18
chr1_155009791_155011877	21	24	27	18
chr1_155019920_155026514	104	82	88	97
chr1_155041143_155061494	408	369	473	425
chr1_155062767_155069697	66	73	78	103
chr1_155074111_155078961	62	24	30	56
chr1_155090157_155104566	300	284	323	298
chr1_155113195_155115438	18	23	33	28
chr1_155198763_155201749	34	33	29	47
chr1_155214873_155217350	36	26	42	46
chr1_155244954_155246938	36	32	49	32
chr1_155261858_155267108	84	60	97	82
chr1_155621758_155625773	40	39	44	42
chr1_155990946_155994887	44	45	52	40
chr1_156085039_156086861	23	24	26	16
chr1_156120704_156122049	16	8	16	15
chr1_156128288_156130662	21	27	17	30
chr1_156336719_156344103	92	86	95	104
chr1_156351382_156363514	250	199	238	252
chr1_156367613_156375667	64	92	84	89
chr1_156383609_156414890	1550	1249	1413	1599
chr1_156482093_156485858	22	21	36	34
chr1_156542884_156546276	26	27	38	32
chr1_156581756_156585365	40	36	26	29
chr1_156586380_156597364	249	223	228	288
chr1_156601429_156629844	540	547	462	479
chr1_156648262_156651335	36	35	34	32
chr1_156658288_156661582	41	36	51	46
chr1_156672405_156675336	66	40	71	60
chr1_156679044_156682856	31	42	32	47
chr1_156775427_156777012	17	10	18	17
chr1_156780625_156788013	135	125	137	148
chr1_156788891_156794562	86	58	81	64
chr1_156798333_156842543	1224	1223	1103	1275
chr1_156843483_156876842	564	588	532	592
chr1_156878512_156901398	657	662	620	750
chr1_157018954_157020395	17	9	16	19
chr1_157040177_157044504	54	53	45	41
chr1_157072003_157081308	99	86	78	105
chr1_157109190_157118732	89	102	89	101
chr1_157147180_157153387	55	60	33	46
chr1_157160184_157162597	12	18	25	25
chr1_157163999_157168489	55	45	23	23
chr1_157239551_157248073	120	112	106	132
chr1_157249274_157250992	18	19	11	14
chr1_157511201_157513560	29	28	23	30
chr1_157556681_157561543	45	43	54	66
chr1_157614207_157616879	13	15	31	32
chr1_157775917_157777253	11	16	6	16
chr1_157825095_157826577	15	16	3	9
chr1_157888064_157890355	28	26	14	16
chr1_157931992_157935554	41	26	35	47
chr1_157955976_157959317	43	22	28	23
chr1_158080720_158086179	81	98	78	80
chr1_158109646_158125545	174	172	155	187
chr1_158129758_158133032	35	30	22	39
chr1_158137912_158141508	35	39	26	23
chr1_158145190_158160056	404	382	348	424
chr1_158972657_158978990	79	92	72	92
chr1_158983717_158986167	13	36	25	29
chr1_159045243_159048747	32	33	46	55
chr1_159138989_159141322	42	32	42	34
chr1_159143353_159145644	36	18	20	26
chr1_159156041_159157449	15	13	24	18
chr1_159158918_159160464	22	12	16	20
chr1_159751207_159752344	7	10	13	14
chr1_159766584_159767754	14	9	13	17
chr1_159783648_159784802	14	9	8	16
chr1_159790989_159795955	33	46	43	53
chr1_159799367_159801384	24	13	20	21
chr1_159813608_159815062	18	16	22	12
chr1_159816474_159820371	42	34	25	40
chr1_159821712_159840455	212	216	235	257
chr1_159850634_159855449	24	28	40	55
chr1_159863741_159866007	22	18	32	19
chr1_159867811_159872334	45	59	54	70
chr1_159891774_159894722	34	24	31	20
chr1_159922759_159924317	18	16	21	22
chr1_159932149_159933730	18	21	20	14
chr1_159943189_159948583	60	49	57	63
chr1_159969005_159970794	11	26	12	24
chr1_160002228_160011159	93	104	83	118
chr1_160020479_160024672	47	36	47	54
chr1_160025284_160027767	33	38	26	21
chr1_160036670_160045860	130	148	124	139
chr1_160046553_160057231	207	172	170	192
chr1_160069057_160073222	37	31	47	50
chr1_160137266_160138610	11	21	15	6
chr1_160140436_160146020	59	81	47	69
chr1_160156703_160159830	21	45	27	26
chr1_160234574_160235821	15	16	12	11
chr1_160366597_160368201	26	16	12	14
chr1_160518146_160519509	9	13	17	13
chr1_160592986_160594581	20	16	11	11
chr1_160605988_160609461	33	48	40	39
chr1_160614412_160617592	29	48	30	36
chr1_160694556_160695790	12	17	13	11
chr1_161016600_161019168	44	24	34	39
chr1_161064769_161066720	16	17	25	16
chr1_161147520_161148829	10	12	13	21
chr1_161191521_161193779	20	19	21	17
chr1_161224373_161232029	140	114	114	162
chr1_161246875_161248100	13	16	11	14
chr1_161360072_161361588	26	11	26	10
chr1_161398138_161410014	223	231	230	256
chr1_161442187_161444839	72	84	71	81
chr1_161452007_161453586	12	13	17	16
chr1_161458161_161461867	44	37	47	40
chr1_161474948_161476288	17	16	7	18
chr1_161494848_161499592	109	115	104	110
chr1_161501392_161502960	21	19	21	16
chr1_161511384_161512876	23	25	23	35
chr1_161690315_161702596	220	198	173	211
chr1_161991808_161997776	127	115	114	130
chr1_161999204_162005728	69	74	60	70
chr1_162017010_162019044	14	22	11	16
chr1_162056888_162065486	86	165	110	126
chr1_162117933_162119191	6	18	10	17
chr1_162791025_162794537	44	45	34	44
chr1_162952345_162953868	18	6	4	17
chr1_163040272_163041533	9	18	16	7
chr1_163377861_163381573	50	32	33	36
chr1_163425092_163427278	21	20	13	28
chr1_163528339_163530801	18	44	22	35
chr1_164263556_164271601	155	199	163	180
chr1_164288754_164293709	59	97	53	72
chr1_164829296_164834031	55	53	44	62
chr1_164872239_164874473	11	29	25	29
chr1_164875346_164877201	13	18	18	9
chr1_164948494_164956423	92	87	98	94
chr1_164967437_164970071	23	20	23	29
chr1_165025776_165034931	153	190	166	188
chr1_165083589_165096889	278	284	271	309
chr1_165102506_165105106	27	23	20	17
chr1_165106974_165114927	108	102	80	96
chr1_165122687_165124471	21	16	14	28
chr1_165127022_165128381	21	12	16	15
chr1_165182904_165184391	9	16	10	19
chr1_165199870_165211252	289	257	252	289
chr1_165216760_165219158	28	17	18	27
chr1_165222358_165230904	105	117	82	83
chr1_165253175_165255790	18	31	22	28
chr1_165271650_165272956	9	10	18	16
chr1_165274794_165278180	42	18	27	27
chr1_165283233_165285181	14	33	20	24
chr1_165310831_165352965	928	810	826	905
chr1_165354895_165360299	62	67	46	60
chr1_165362646_165365059	28	21	21	27
chr1_165368984_165370274	21	5	16	12
chr1_165379698_165381564	15	17	19	22
chr1_165382881_165385571	25	25	29	25
chr1_165406284_165421973	377	308	384	414
chr1_165422104_165423403	18	12	7	21
chr1_165455279_165457007	16	20	14	14
chr1_165500062_165504797	63	43	39	32
chr1_165513258_165516467	51	52	38	56
chr1_165528666_165531642	31	46	39	36
chr1_165548255_165549446	6	15	16	11
chr1_165556489_165560597	54	30	43	29
chr1_165597140_165598969	29	19	14	22
chr1_165903149_165904705	11	18	16	7
chr1_165910080_165911891	8	9	19	19
chr1_166130552_166135848	104	81	82	95
chr1_166136584_166138472	22	27	22	28
chr1_166258197_166260592	22	22	22	15
chr1_166348518_166354976	73	69	63	81
chr1_166805297_166808382	21	29	29	30
chr1_166849874_166855906	106	111	97	113
chr1_166885175_166896714	302	261	209	272
chr1_166897726_166908060	89	103	87	92
chr1_166913329_166924128	236	252	152	183
chr1_166926225_166929729	42	48	34	34
chr1_166933447_166936953	48	30	29	27
chr1_166937848_166952360	333	330	277	317
chr1_166981815_166982878	14	14	6	15
chr1_167011787_167017935	81	77	61	59
chr1_167019720_167022543	31	34	18	24
chr1_167088085_167091763	44	46	47	54
chr1_167406462_167411318	91	99	91	125
chr1_167421491_167427881	156	122	146	172
chr1_167454938_167458110	31	28	17	37
chr1_167463985_167465306	8	13	20	15
chr1_167495352_167496776	19	15	12	17
chr1_167595094_167607085	270	248	236	265
chr1_167651734_167653389	11	19	6	23
chr1_167680166_167683450	60	47	47	54
chr1_167735249_167740391	87	81	83	115
chr1_167814207_167815757	7	9	15	14
chr1_168103471_168109447	71	73	72	87
chr1_168354384_168356932	38	42	31	30
chr1_169072826_169074740	32	20	14	19
chr1_169395327_169399193	46	52	33	61
chr1_169554464_169556333	20	29	23	24
chr1_169559491_169562432	41	16	21	18
chr1_169562632_169565718	30	36	22	22
chr1_169640442_169642169	17	23	16	26
chr1_169643522_169645237	14	20	18	9
chr1_169647185_169667984	674	729	684	907
chr1_169677984_169679436	17	8	15	22
chr1_169971099_169972995	28	16	20	26
chr1_170112814_170117733	72	93	73	73
chr1_170552903_170561122	139	172	131	183
chr1_170625105_170645130	789	708	682	890
chr1_170655633_170657067	6	8	15	14
chr1_171217297_171222551	66	61	53	44
chr1_171273396_171278829	35	38	50	61
chr1_171808141_171814837	88	82	90	81
chr1_172246024_172251826	51	72	61	52
chr1_172359163_172361541	21	32	21	31
chr1_172497437_172498950	11	11	14	18
chr1_173131614_173135605	36	43	41	47
chr1_173176061_173183991	117	113	166	166
chr1_173245959_173250639	43	88	50	59
chr1_173639123_173640615	20	18	22	23
chr1_173676438_173683600	81	98	93	123
chr1_173997503_174003317	54	63	59	69
chr1_174126046_174130867	48	47	40	51
chr1_174769626_174770892	14	29	10	20
chr1_175117640_175123194	51	57	50	58
chr1_175159377_175165551	97	89	119	126
chr1_175219795_175221530	12	16	7	16
chr1_175376786_175378157	9	12	20	19
chr1_175461116_175465962	50	66	52	62
chr1_175481500_175482966	17	19	12	10
chr1_175486978_175489222	14	23	15	31
chr1_175516979_175522674	41	66	26	47
chr1_175531675_175556161	496	538	475	583
chr1_175559492_175563654	52	53	47	43
chr1_175565632_175572834	169	165	128	155
chr1_175573046_175576798	25	30	41	33
chr1_175604395_175606398	21	23	22	16
chr1_175668072_175672771	44	47	36	34
chr1_175679153_175680314	7	14	14	9
chr1_175688475_175690800	28	22	24	22
chr1_175707132_175716334	117	113	114	117
chr1_175720038_175721798	15	21	21	10
chr1_175723999_175726860	40	32	30	37
chr1_175729634_175731283	13	20	17	14
chr1_175735262_175738070	27	25	31	28
chr1_175739141_175746764	74	106	54	73
chr1_175749550_175760444	117	127	81	110
chr1_175775330_175780577	42	67	25	43
chr1_175809234_175813929	32	56	54	47
chr1_175825922_175827134	8	10	14	17
chr1_175830283_175834307	45	52	32	59
chr1_175836155_175845334	80	122	95	87
chr1_175848187_175896471	1546	1831	1714	2084
chr1_176519048_176523872	46	54	42	52
chr1_176872196_176874456	22	30	17	29
chr1_176964287_176967412	31	35	24	38
chr1_177014121_177016168	20	33	27	19
chr1_177016681_177020224	49	51	37	51
chr1_177032667_177037681	64	64	68	76
chr1_177130815_177153816	521	446	370	445
chr1_177174683_177181136	101	88	86	130
chr1_177225652_177226761	20	10	10	17
chr1_177237641_177242484	56	60	38	47
chr1_177707612_177709143	12	15	10	21
chr1_177881749_177883226	19	21	19	19
chr1_178007453_178009184	19	28	15	14
chr1_178548262_178550038	19	19	22	20
chr1_178551218_178560855	131	101	120	142
chr1_178692336_178693847	14	25	18	16
chr1_178913935_178915655	12	17	18	22
chr1_179199245_179201583	25	33	27	31
chr1_179259806_179273608	334	388	325	320
chr1_179499499_179501540	15	30	26	23
chr1_179542378_179548812	158	158	152	200
chr1_179552114_179558131	67	78	68	59
chr1_179698018_179701002	30	18	27	36
chr1_179707381_179718548	319	347	304	330
chr1_179780153_179786981	88	91	65	68
chr1_180120551_180129123	101	70	97	117
chr1_180187085_180190286	33	36	43	29
chr1_180190467_180211758	446	468	438	442
chr1_180471965_180473594	26	18	22	28
chr1_180865399_180867273	16	10	15	11
chr1_180879944_180886255	85	71	69	55
chr1_181044953_181047318	19	11	26	32
chr1_181053965_181057697	76	71	61	58
chr1_181059017_181061957	58	41	34	44
chr1_181063398_181081673	346	299	264	284
chr1_181097270_181099804	27	28	28	28
chr1_181108845_181112900	37	40	49	53
chr1_181113473_181114787	11	14	18	11
chr1_181117734_181119283	7	18	7	17
chr1_181151158_181155764	55	40	33	30
chr1_181157936_181162562	59	60	54	62
chr1_181281657_181293474	330	300	274	351
chr1_181298814_181301170	27	26	10	15
chr1_181359025_181360317	5	15	12	20
chr1_181393037_181395742	30	33	35	33
chr1_181449250_181461408	282	311	262	309
chr1_181463592_181465418	12	18	15	12
chr1_181467840_181469408	18	10	20	11
chr1_181525670_181527647	20	22	14	20
chr1_181574604_181578026	37	41	32	37
chr1_181731866_181733013	15	8	4	14
chr1_182038356_182040662	27	26	29	25
chr1_182041309_182043010	25	10	11	16
chr1_182571595_182588971	264	304	265	297
chr1_182631440_182637884	98	85	65	120
chr1_182638411_182642024	28	22	45	50
chr1_182646912_182658076	168	167	147	171
chr1_182669701_182670969	11	14	18	14
chr1_182755407_182763999	167	180	194	212
chr1_182993515_182995462	23	20	19	25
chr1_183003248_183006709	30	46	39	29
chr1_183384210_183389367	88	67	78	103
chr1_183437994_183439560	9	15	16	16
chr1_183605554_183607467	38	33	33	30
chr1_183772343_183777571	63	87	62	64
chr1_183908595_183917761	165	212	164	204
chr1_183935301_183936573	23	14	3	16
chr1_183964471_183967743	27	37	35	37
chr1_183972677_183973747	15	14	7	8
chr1_183992510_183999002	106	129	89	85
chr1_184000897_184012594	205	249	209	231
chr1_184018733_184020164	12	25	19	15
chr1_184192196_184195445	54	64	39	64
chr1_184357345_184358372	7	10	13	15
chr1_184724529_184726826	37	45	40	53
chr1_184848060_184856180	65	119	80	85
chr1_184940177_184946175	122	124	95	107
chr1_185012477_185014661	30	38	39	30
chr1_185667482_185671571	53	62	45	65
chr1_185701279_185705598	45	35	63	66
chr1_186647887_186651660	58	54	46	61
chr1_186798019_186799986	20	16	18	19
chr1_187014698_187016586	21	32	18	16
chr1_190441849_190447578	167	142	140	163
chr1_190564196_190566374	27	25	23	38
chr1_192068532_192071886	47	40	33	39
chr1_192775836_192777618	31	23	22	27
chr1_193071885_193073750	36	28	35	46
chr1_193694201_193699671	113	98	129	126
chr1_193707393_193713665	90	105	113	94
chr1_196845626_196848782	53	76	49	56
chr1_197742475_197745907	35	38	31	32
chr1_197784515_197785939	11	20	14	14
chr1_197863363_197864831	19	17	10	9
chr1_197865671_197898311	1468	1271	1367	1640
chr1_198284786_198286637	10	21	21	13
chr1_199715371_199718748	51	40	57	45
chr1_199996189_200016088	633	548	529	571
chr1_200047134_200053566	72	93	69	87
chr1_200255483_200262978	101	106	109	121
chr1_200269258_200274592	83	113	100	122
chr1_200454485_200456551	20	17	32	22
chr1_200700265_200707770	86	89	83	86
chr1_200932018_200933887	13	12	19	19
chr1_201053669_201057339	37	36	34	36
chr1_201073597_201075557	25	22	22	16
chr1_201080292_201088536	150	155	115	158
chr1_201093026_201096477	42	42	45	45
chr1_201136387_201142855	81	69	56	80
chr1_201152763_201154102	18	12	15	15
chr1_201177393_201181056	64	51	62	45
chr1_201229179_201232341	45	42	52	43
chr1_201235059_201236745	18	12	13	14
chr1_201248334_201255967	147	128	102	136
chr1_201256086_201257549	11	17	18	11
chr1_201262262_201265398	25	39	22	20
chr1_201267694_201270860	31	41	23	33
chr1_201277470_201280400	43	37	45	36
chr1_201292536_201294152	16	18	6	6
chr1_201366919_201374124	102	81	112	96
chr1_201415800_201417211	18	18	14	20
chr1_201436006_201451176	244	228	211	250
chr1_201475900_201479988	53	69	44	49
chr1_201502261_201515687	224	210	208	233
chr1_201525921_201530427	49	43	58	59
chr1_201551453_201553299	15	18	23	14
chr1_201569734_201571057	11	15	18	12
chr1_201590939_201593149	22	9	25	16
chr1_201613032_201616885	45	22	48	37
chr1_201856209_201860928	62	67	53	69
chr1_201913468_201919366	115	76	86	109
chr1_201950260_201951383	15	17	11	21
chr1_201980098_201981413	19	11	23	9
chr1_202114253_202117814	43	38	44	51
chr1_202161576_202169866	133	136	119	139
chr1_202181269_202182601	19	15	10	16
chr1_202183416_202185690	29	32	18	14
chr1_202215594_202219382	42	56	39	38
chr1_202247421_202250105	32	39	26	34
chr1_202607469_202617187	177	147	155	181
chr1_202663757_202665151	18	7	13	14
chr1_202676371_202684961	112	110	116	133
chr1_202777824_202782141	101	76	100	112
chr1_202927856_202929023	16	8	22	20
chr1_202937008_202938591	29	20	26	42
chr1_202944156_202945186	17	7	15	3
chr1_202965218_202966853	14	23	11	16
chr1_202994350_203000889	123	85	110	123
chr1_203002597_203004221	10	8	21	18
chr1_203018769_203020792	23	31	12	20
chr1_203041724_203049839	181	188	158	167
chr1_203055172_203056690	21	16	16	14
chr1_203060456_203062145	10	17	10	22
chr1_203075832_203090182	151	184	171	157
chr1_203093448_203100265	131	117	117	107
chr1_203168680_203171451	32	29	18	21
chr1_203183516_203185333	18	21	15	18
chr1_203185774_203189360	24	41	36	28
chr1_203191443_203193663	11	24	18	22
chr1_203197008_203198467	15	22	15	17
chr1_203206141_203208411	23	16	32	19
chr1_203236984_203238514	22	14	9	20
chr1_203238526_203250609	200	203	166	211
chr1_203251932_203299886	969	962	865	1034
chr1_203302958_203306084	36	31	33	37
chr1_203308239_203311362	48	38	28	33
chr1_203315546_203320924	57	63	48	60
chr1_203327865_203334407	88	84	77	66
chr1_203373373_203375276	20	9	23	12
chr1_203387903_203389894	20	15	26	22
chr1_203393904_203397660	38	36	37	46
chr1_203399498_203400927	11	20	17	11
chr1_203407586_203412131	48	56	50	45
chr1_203433446_203435193	14	22	20	23
chr1_203437939_203439205	11	15	5	18
chr1_203446038_203448907	28	27	22	37
chr1_203454755_203456238	20	15	18	24
chr1_203459252_203463345	39	37	47	33
chr1_203471576_203473772	13	27	30	11
chr1_203478229_203493134	264	297	273	262
chr1_203501139_203504505	18	36	21	28
chr1_203526421_203528806	35	17	19	24
chr1_203553177_203554290	7	8	15	20
chr1_203565703_203571507	69	66	55	76
chr1_203596599_203601607	124	90	85	114
chr1_203617353_203621086	46	44	52	52
chr1_203955512_203957403	11	31	15	22
chr1_203962756_203964679	21	21	18	30
chr1_203966753_203968550	15	16	21	13
chr1_203993024_203997285	39	62	40	58
chr1_204040283_204041781	11	24	17	20
[truncated: 20,567 more rows]

## Sheet: K27ac_peaks
Figure 4E-H3K27ac nChIP-seq read counts in the peaks
	Hap_1	Hap_2	STITCH_1	STITCH_2
chr1_566995_568059	86	90	104	40
chr1_959359_961404	24	38	11	11
chr1_1240282_1241619	8	23	15	8
chr1_1293250_1294825	16	27	9	16
chr1_1342132_1347223	51	97	31	41
chr1_1365252_1370226	33	66	36	40
chr1_1502120_1503970	10	27	16	10
chr1_1509321_1511017	20	32	9	16
chr1_1708868_1712332	41	58	11	31
chr1_1820823_1822169	14	25	8	14
chr1_1825437_1826690	15	19	6	7
chr1_2143583_2145338	14	28	8	14
chr1_2178443_2181758	48	64	41	38
chr1_2206714_2212184	65	96	51	48
chr1_2245406_2246748	7	20	3	18
chr1_2516921_2518225	18	24	4	9
chr1_3387285_3389432	22	34	11	25
chr1_3705330_3710707	36	89	25	25
chr1_3816097_3817896	24	29	10	11
chr1_5890200_5893437	38	31	20	18
chr1_6258760_6261118	38	47	24	9
chr1_6298336_6301490	39	53	32	25
chr1_6445384_6447507	28	29	15	13
chr1_6662861_6665214	26	54	13	14
chr1_6753632_6754953	16	22	10	12
chr1_6924759_6926222	10	21	10	15
chr1_6928053_6929932	21	32	12	9
chr1_7357087_7360885	75	55	34	37
chr1_7594888_7597424	27	42	10	18
chr1_7668018_7669536	14	31	15	11
chr1_8075378_8081265	67	68	38	37
chr1_8225394_8229615	68	78	47	52
chr1_8298828_8300325	12	20	9	14
chr1_8326101_8327699	15	21	13	16
chr1_8467887_8470921	35	37	17	21
chr1_8483469_8485551	20	34	8	17
chr1_8516358_8526528	136	141	106	131
chr1_8761289_8765502	49	56	40	45
chr1_8770770_8773722	38	41	32	25
chr1_8849364_8851234	16	35	18	12
chr1_8876567_8878813	29	19	13	18
chr1_8881099_8883723	21	19	22	23
chr1_9110667_9111912	12	18	16	9
chr1_9949897_9951074	11	17	4	16
chr1_10237719_10240006	17	41	18	19
chr1_10377364_10380972	33	57	35	29
chr1_10407370_10409511	27	23	21	14
chr1_10447333_10448995	19	26	12	10
chr1_10691648_10693148	6	16	20	14
chr1_10874580_10876339	22	16	4	9
chr1_11072026_11073309	19	20	9	13
chr1_11159202_11160375	17	16	6	7
chr1_11346235_11348379	20	19	13	17
chr1_11741356_11744076	35	44	21	17
chr1_11749205_11752788	45	60	30	30
chr1_11796035_11798166	21	31	20	16
chr1_11966991_11970786	48	99	35	47
chr1_11993958_11994994	14	23	11	11
chr1_12126500_12128305	19	20	10	15
chr1_12308443_12310380	20	33	28	20
chr1_12661863_12663608	7	18	7	13
chr1_12676372_12679008	23	38	11	19
chr1_12686792_12691725	53	85	30	55
chr1_12696239_12697305	13	13	4	12
chr1_12773112_12778108	50	46	31	39
chr1_13911665_13913300	23	19	13	19
chr1_14461541_14464124	62	71	23	34
chr1_14509656_14510804	17	15	9	7
chr1_14646386_14647710	6	21	7	12
chr1_15066628_15068242	17	21	3	7
chr1_15522935_15524307	16	21	4	10
chr1_15532320_15535123	29	49	21	25
chr1_15833655_15837182	50	65	39	36
chr1_16134796_16135801	13	16	6	8
chr1_16160625_16162453	16	43	20	19
chr1_16175945_16179078	26	38	20	15
chr1_16211242_16213552	39	29	18	21
chr1_16226444_16227772	12	20	10	5
chr1_16275910_16277006	12	16	6	3
chr1_16338477_16340503	21	23	3	8
chr1_16439141_16444386	52	75	28	40
chr1_16470256_16474617	39	85	34	40
chr1_16507901_16509734	22	27	9	11
chr1_16536854_16539771	29	45	21	32
chr1_16693182_16694573	17	17	11	17
chr1_16839317_16840969	51	80	42	35
chr1_16885639_16889592	59	69	48	51
chr1_16891169_16894547	54	80	95	46
chr1_16918103_16953401	405	678	512	349
chr1_16955925_16959537	29	67	41	40
chr1_16961398_16972448	115	179	141	89
chr1_17230292_17232106	38	59	20	26
chr1_17454485_17457702	43	47	17	31
chr1_17759802_17766662	67	109	41	59
chr1_17795037_17798266	61	71	26	37
chr1_17866433_17867936	23	23	9	10
chr1_17871718_17881016	108	151	58	79
chr1_17885167_17888942	31	55	23	20
chr1_17893669_17896843	20	46	15	19
chr1_17898707_17903187	47	53	22	26
chr1_18480769_18482146	14	17	7	6
chr1_18501754_18503617	19	25	6	7
chr1_18558992_18561856	43	89	21	34
chr1_18616897_18626619	130	154	75	99
chr1_18742908_18747732	87	89	39	50
chr1_18773265_18775524	19	31	10	15
chr1_18806449_18808114	16	24	13	26
chr1_19228600_19229660	21	28	6	9
chr1_19266501_19269217	33	38	11	19
chr1_19535609_19537831	26	35	13	11
chr1_19577679_19579245	23	28	16	22
chr1_19726287_19729429	41	35	33	24
chr1_19807358_19808945	13	27	9	7
chr1_19811181_19812859	14	36	10	20
chr1_19945942_19947388	14	22	25	7
chr1_20142296_20143816	19	24	17	18
chr1_21112889_21114639	19	33	9	13
chr1_21650074_21653051	22	35	22	26
chr1_21655472_21656518	14	9	5	12
chr1_21864048_21865174	17	18	5	4
chr1_22109580_22110864	11	20	5	13
chr1_22235865_22237602	30	31	15	19
chr1_22257736_22262847	49	81	36	29
chr1_22269214_22271788	38	48	26	30
chr1_22379142_22380508	11	23	5	13
chr1_22559968_22562266	33	27	17	9
chr1_22571521_22572800	20	17	5	8
chr1_22587880_22592215	34	60	20	24
chr1_22768528_22771966	35	31	23	23
chr1_22955401_22957236	23	30	20	7
chr1_23130426_23132126	18	18	12	17
chr1_23588596_23593007	50	48	34	32
chr1_23670007_23671320	10	16	2	15
chr1_23880202_23882874	28	45	13	23
chr1_23894550_23896420	14	37	14	21
chr1_23917663_23919291	20	21	9	7
chr1_23921486_23930151	117	144	67	94
chr1_24018027_24019761	20	19	22	13
chr1_24476835_24479268	56	75	36	34
chr1_24612442_24614478	18	25	15	25
chr1_24633861_24638747	52	50	44	42
chr1_24789072_24793051	52	59	28	39
chr1_24807682_24808807	15	19	5	9
chr1_24967912_24970794	26	47	22	13
chr1_25050874_25052782	21	27	19	14
chr1_25061371_25069792	77	93	57	100
chr1_25071764_25073361	18	20	9	7
chr1_26032466_26035752	41	65	34	39
chr1_26053792_26057237	31	30	9	13
chr1_26231788_26233938	31	29	7	14
chr1_26676418_26678962	29	43	18	16
chr1_26735759_26740999	81	77	40	38
chr1_26744000_26747408	70	63	30	47
chr1_26868116_26869416	13	22	9	5
chr1_26945245_26948469	33	46	20	24
chr1_27018595_27020497	17	23	13	19
chr1_27021757_27025061	41	50	23	30
chr1_27112060_27114827	30	29	15	31
chr1_27126128_27128113	14	25	26	10
chr1_27324009_27337231	135	239	102	115
chr1_27357467_27359200	24	28	14	13
chr1_27383895_27386663	36	58	27	28
chr1_27424534_27426572	26	20	11	10
chr1_27480939_27482221	14	11	7	12
chr1_27633430_27635134	34	23	11	13
chr1_27744150_27746565	29	28	21	26
chr1_27754546_27759390	63	63	51	47
chr1_27762483_27763837	12	21	15	13
chr1_27814389_27818038	45	47	21	26
chr1_27819776_27824497	23	59	29	28
chr1_27829697_27832377	32	47	19	13
chr1_27890124_27892233	18	31	8	8
chr1_27896558_27902558	64	87	33	51
chr1_27917079_27921070	24	59	23	26
chr1_28156771_28158387	18	28	13	12
chr1_28696110_28697171	13	17	9	13
chr1_28831407_28836087	69	105	44	55
chr1_28974040_28975905	24	31	16	26
chr1_28994104_28996592	25	37	16	24
chr1_29062085_29064676	29	56	20	38
chr1_29240922_29242022	4	19	3	12
chr1_29253511_29255279	20	26	7	14
chr1_29488336_29494190	69	108	44	72
chr1_29507335_29509537	24	37	14	25
chr1_29511898_29514424	27	37	18	22
chr1_29575311_29579012	55	51	33	29
chr1_29826373_29829743	34	50	28	46
chr1_30395772_30399052	41	44	26	32
chr1_30445719_30448687	66	90	41	43
chr1_30474809_30476280	11	20	10	15
chr1_31360029_31361661	13	28	16	16
chr1_31374064_31376404	22	38	18	22
chr1_31535614_31539129	32	42	43	31
chr1_31626865_31628834	25	37	16	13
chr1_31768655_31770674	11	29	20	14
chr1_32109197_32111666	18	55	11	20
chr1_32169533_32171842	26	28	17	10
chr1_32420088_32422392	24	39	20	15
chr1_32738196_32741109	33	39	15	14
chr1_32800458_32801739	15	23	5	10
chr1_32859971_32861074	10	20	13	13
chr1_33101876_33103574	20	21	13	7
chr1_33115599_33118039	19	36	15	14
chr1_33220072_33228459	112	151	61	93
chr1_33230378_33232952	36	38	23	18
chr1_33281712_33284710	37	67	22	34
chr1_33618013_33619959	24	22	13	22
chr1_34631507_34634730	24	45	17	27
chr1_35686683_35688404	13	23	12	17
chr1_35733526_35736195	29	38	14	22
chr1_35854959_35860874	97	96	67	69
chr1_35997717_36002791	53	66	42	50
chr1_36018760_36021986	59	79	26	31
chr1_36235010_36236242	8	19	7	13
chr1_36350148_36352117	23	21	19	11
chr1_36626165_36627709	20	22	10	18
chr1_36688713_36691047	25	39	14	17
chr1_36838976_36840799	23	29	23	18
chr1_36851378_36853568	41	45	28	24
chr1_36929201_36930779	12	25	12	15
chr1_37235454_37237342	23	25	8	14
chr1_37289679_37290706	17	17	7	12
chr1_37779939_37783087	34	34	20	20
chr1_37979948_37981060	13	12	1	18
chr1_38461417_38467523	66	98	45	64
chr1_38495107_38496681	16	26	12	8
chr1_38605480_38607101	16	28	7	15
chr1_38733867_38737541	39	48	41	41
chr1_38750041_38753143	35	33	15	26
chr1_38829136_38831571	34	26	24	21
chr1_38834513_38838713	45	55	33	31
chr1_38889842_38892322	33	35	25	25
chr1_38916436_38918471	19	30	8	14
chr1_38962146_38964094	23	22	10	14
chr1_39023053_39024746	16	21	2	17
chr1_39418280_39419980	21	29	20	19
chr1_39450457_39463141	148	158	109	120
chr1_39466228_39468434	18	31	22	30
chr1_39481071_39483260	27	38	15	15
chr1_39567888_39575080	115	135	54	77
chr1_39597248_39601906	50	65	36	45
chr1_39605189_39611482	87	106	63	58
chr1_39614172_39620239	56	79	44	47
chr1_39622269_39630287	79	120	66	61
chr1_39634112_39640931	86	117	60	56
chr1_39654460_39658154	37	48	28	20
chr1_39669786_39671180	18	22	5	9
chr1_39678685_39680975	14	33	13	16
chr1_39686263_39688988	32	32	23	17
chr1_39694943_39697620	35	51	22	22
chr1_39730773_39736454	69	89	42	28
chr1_39811762_39813389	22	28	5	9
chr1_40357659_40360125	38	41	22	20
chr1_40362743_40365145	30	36	17	15
chr1_40441982_40446705	64	64	40	33
chr1_40504671_40506574	20	35	22	20
chr1_40722667_40724266	9	23	18	13
chr1_41127149_41129766	18	36	11	10
chr1_41156777_41158777	37	32	18	29
chr1_41173864_41177670	50	64	32	29
chr1_41445052_41446363	15	22	4	4
chr1_41952131_41953190	12	15	5	8
chr1_43401719_43403026	14	24	6	5
chr1_43422251_43430526	103	99	60	53
chr1_43432329_43433898	17	22	18	16
chr1_43470483_43476097	80	86	50	68
chr1_43555292_43559331	59	65	47	50
chr1_43608493_43609908	9	17	7	13
chr1_43671652_43673509	22	31	15	22
chr1_43761279_43763415	33	26	13	24
chr1_43813607_43815751	23	25	11	10
chr1_43855026_43856153	3	16	3	11
chr1_43996110_43997486	14	22	3	10
chr1_44014998_44016795	27	32	19	16
chr1_44117580_44120098	31	32	16	21
chr1_44124896_44127864	31	49	25	19
chr1_44231297_44235905	64	64	49	38
chr1_44300007_44308643	82	128	70	70
chr1_44323671_44324856	14	15	9	6
chr1_44353248_44355884	22	26	29	26
chr1_44496836_44497942	14	19	6	7
chr1_44554196_44556038	21	26	14	5
chr1_44619503_44622129	30	39	18	26
chr1_44941298_44943063	17	20	12	15
chr1_44949447_44952404	30	51	22	22
chr1_44972891_44974797	12	21	12	21
chr1_44988915_44991230	26	33	13	20
chr1_44996591_44999403	26	40	26	26
chr1_45001179_45004147	28	42	27	34
chr1_45007216_45010081	44	51	20	29
chr1_45041405_45042732	19	24	11	20
chr1_45058374_45059465	6	15	2	10
chr1_45096690_45098665	32	39	20	23
chr1_45187024_45188293	15	32	15	13
chr1_45196477_45198304	33	27	16	9
chr1_45204861_45206935	21	25	13	8
chr1_45240650_45242245	27	34	17	12
chr1_45272357_45273850	21	18	15	10
chr1_45284896_45286557	17	30	18	17
chr1_45769714_45773928	45	49	28	44
chr1_45804796_45806216	13	22	14	12
chr1_45920225_45922023	12	20	13	12
chr1_45987118_45991384	45	60	36	29
chr1_46389801_46396136	82	85	42	54
chr1_46597327_46599896	26	45	17	19
chr1_46766622_46770063	44	46	30	32
chr1_46772353_46775781	29	43	42	28
chr1_46827684_46829688	22	45	20	21
chr1_47140845_47144284	40	49	21	30
chr1_47288008_47289589	22	23	17	16
chr1_47578372_47579407	13	15	4	5
chr1_47798974_47800373	17	19	5	10
chr1_49061024_49062336	10	20	9	15
chr1_50995985_50997246	9	15	3	11
chr1_51162415_51169300	91	84	62	81
chr1_51886635_51890579	59	81	44	38
chr1_52340103_52341620	12	19	15	14
chr1_52343461_52345890	28	50	15	22
chr1_52428696_52430533	18	31	14	11
chr1_52470748_52474297	79	75	30	33
chr1_52520354_52523955	45	46	14	31
chr1_52733324_52734577	14	19	7	9
chr1_52816024_52817715	9	29	8	14
chr1_52919407_52921086	28	20	14	22
chr1_52926062_52929456	36	27	27	30
chr1_53340847_53343114	35	35	23	16
chr1_53439546_53443828	60	56	35	47
chr1_53480295_53481654	21	14	7	13
chr1_53790434_53792743	19	44	20	11
chr1_53862446_53864401	14	22	12	20
chr1_53881442_53885624	43	44	33	30
chr1_53894110_53898585	101	100	69	90
chr1_53911228_53916800	90	77	52	57
chr1_54168926_54171526	23	36	11	13
chr1_54600069_54602575	30	49	27	12
chr1_54770356_54781481	122	174	84	89
chr1_54807591_54809666	21	31	14	10
chr1_54819786_54821144	16	23	12	7
chr1_54830702_54831716	18	13	10	11
chr1_54839759_54845928	66	93	38	44
chr1_54872359_54874786	40	43	19	28
chr1_54952469_54955014	23	23	6	19
chr1_55007477_55008927	19	19	6	12
chr1_55036000_55038757	34	28	20	14
chr1_55044213_55050700	50	87	38	35
chr1_55425555_55430145	95	96	39	57
chr1_55680503_55682144	19	21	6	15
chr1_56184077_56185267	13	16	8	5
chr1_56662049_56663085	15	20	12	8
chr1_56835274_56836972	18	27	10	13
chr1_56982091_56983450	15	21	13	8
chr1_56993246_57011299	219	234	141	183
chr1_57014196_57019394	55	71	51	57
chr1_57027293_57032713	75	102	49	51
chr1_57034261_57036034	18	16	9	20
chr1_57040659_57042212	20	17	17	9
chr1_57153170_57154875	14	17	29	10
chr1_57636586_57638802	29	34	22	17
chr1_58064417_58065689	16	22	10	9
chr1_58392568_58393923	5	16	16	14
chr1_58436137_58437710	17	17	16	15
chr1_58452921_58454545	17	30	3	11
chr1_58465272_58474728	134	121	70	99
chr1_58491333_58502285	125	116	88	108
chr1_58620059_58625281	76	60	38	40
chr1_59165026_59174130	109	134	81	103
chr1_59340169_59341895	24	19	15	6
chr1_59478517_59482134	32	57	24	38
chr1_59527361_59533669	94	75	48	65
chr1_59536662_59539448	34	35	31	32
chr1_59541399_59546980	122	104	69	86
chr1_59548538_59550799	20	36	24	24
chr1_59555191_59557695	20	32	24	27
chr1_59581454_59584128	29	30	24	37
chr1_59774675_59776809	19	21	17	18
chr1_59912284_59914043	17	22	11	3
chr1_60059897_60061648	16	18	10	6
chr1_60143299_60144389	15	12	5	12
chr1_60322051_60323292	14	22	6	8
chr1_61313045_61316357	56	36	27	45
chr1_61335502_61338016	32	27	17	24
chr1_61369961_61373528	59	46	37	41
chr1_61469763_61472906	24	24	22	34
chr1_61575558_61579292	35	41	35	18
chr1_61585866_61587536	9	23	20	16
chr1_61607334_61608443	6	15	8	12
chr1_61617829_61619038	12	22	10	6
chr1_61713336_61717589	70	61	35	58
chr1_61733637_61736605	31	31	25	24
chr1_61747736_61752713	51	86	40	50
chr1_61760212_61764276	69	62	39	64
chr1_61766421_61768140	21	19	18	19
chr1_61802723_61804148	13	19	15	8
chr1_61901997_61903078	10	17	16	4
chr1_62211825_62213554	28	24	11	16
chr1_62415167_62420055	66	83	50	57
chr1_62421646_62423369	10	21	23	19
chr1_62497652_62499817	18	33	18	20
chr1_62506137_62507339	15	13	14	10
chr1_62640502_62650390	145	136	96	133
chr1_62660387_62666360	72	74	45	55
chr1_62900904_62903475	28	45	17	24
chr1_63050493_63053204	37	38	20	32
chr1_63570964_63574582	33	33	24	19
chr1_63651136_63657028	72	49	35	48
chr1_63675599_63676984	13	18	11	6
chr1_63734740_63736088	16	11	8	12
chr1_63758673_63762161	85	66	35	54
chr1_63769615_63773335	58	54	43	61
chr1_64000323_64002974	33	32	23	34
chr1_64038813_64040801	23	31	21	27
chr1_64140405_64141791	8	23	15	7
chr1_64194032_64199244	67	85	36	38
chr1_64237104_64264243	364	397	233	315
chr1_64265362_64270990	46	72	27	34
chr1_64295034_64299251	49	48	32	30
chr1_64307944_64310093	25	27	16	14
chr1_64311647_64313948	19	28	9	12
chr1_64369807_64377115	78	117	63	60
chr1_64708695_64710232	13	11	11	20
chr1_64936633_64941982	61	62	39	34
chr1_64954747_64963996	148	160	93	95
chr1_64982777_64985133	25	31	13	11
chr1_64988602_64989945	15	12	9	13
chr1_65363454_65365205	16	15	19	17
chr1_65393359_65395095	7	24	16	9
chr1_65414140_65415671	13	19	19	8
chr1_65530978_65533701	27	29	16	19
chr1_65874062_65876162	25	28	24	20
chr1_65882851_65885315	24	37	17	10
chr1_65889359_65893692	48	69	35	47
chr1_66133447_66134789	13	16	5	8
chr1_66814048_66822981	94	94	76	89
chr1_68213687_68218875	74	75	50	52
chr1_68304413_68307476	46	43	17	29
chr1_68606424_68608240	15	22	8	18
chr1_69441582_69445021	50	44	28	50
chr1_69541898_69544761	49	45	20	27
chr1_70670926_70672174	15	19	13	8
chr1_70686510_70688255	14	27	17	10
chr1_70868919_70870261	19	18	7	7
chr1_70875259_70877375	25	43	16	14
chr1_70907669_70910234	14	35	20	27
chr1_71011991_71013014	11	10	1	13
chr1_71021160_71023693	32	29	19	24
chr1_71050809_71053290	28	31	23	29
chr1_71193507_71194884	19	9	7	12
chr1_71643157_71644643	19	22	9	8
chr1_72290987_72295043	61	47	39	34
chr1_72301711_72303935	32	26	18	28
chr1_72465892_72469671	36	61	26	35
chr1_72488142_72491362	48	26	37	39
chr1_72499511_72501099	17	22	13	15
chr1_73450924_73453705	44	43	31	45
chr1_73497893_73500704	26	33	32	23
chr1_73582299_73583397	18	18	7	6
chr1_74986392_74991535	56	77	42	65
chr1_75217942_75219131	14	14	9	7
chr1_75340129_75341528	9	18	9	13
chr1_75539331_75542384	58	60	34	42
chr1_76137704_76139277	19	14	16	9
chr1_76251372_76254719	45	46	27	19
chr1_76517196_76520367	24	52	23	30
chr1_76692127_76701908	107	113	71	121
chr1_76715739_76718005	19	26	18	34
chr1_76722111_76723850	7	24	10	18
chr1_76759858_76762773	41	44	25	28
chr1_76846985_76848639	11	20	9	17
chr1_76965993_76969044	42	36	30	26
chr1_77384561_77385998	13	21	14	13
chr1_77547041_77549040	20	23	17	18
chr1_77979365_77981635	37	42	19	33
chr1_78148531_78150280	22	21	12	20
chr1_78443623_78446159	34	42	21	18
chr1_79726744_79730172	49	29	27	37
chr1_79950122_79954235	46	35	27	29
chr1_80053252_80057604	70	58	37	53
chr1_80180254_80183411	29	29	21	42
chr1_80645926_80647336	20	12	9	18
chr1_80975125_80976663	24	17	9	13
chr1_80995478_81003301	105	88	69	96
chr1_81069692_81072164	29	29	16	30
chr1_81122516_81125040	26	37	16	30
chr1_81130449_81131910	12	25	7	6
chr1_81537545_81539250	9	8	16	17
chr1_81608462_81611548	26	44	25	23
chr1_81677379_81684803	86	69	60	84
chr1_81695936_81709338	199	162	113	155
chr1_81714278_81721944	159	128	78	101
chr1_81728515_81735784	78	70	54	77
chr1_81769666_81783079	200	165	112	152
chr1_81799963_81801519	15	12	8	12
chr1_81812860_81817926	86	83	54	61
chr1_81844420_81846065	17	26	10	26
chr1_81872396_81876762	55	45	39	32
chr1_81877857_81881847	62	40	29	25
chr1_81894706_81900533	94	86	56	79
chr1_81917168_81921568	75	73	50	47
chr1_81935133_81938454	22	43	26	28
chr1_81972209_81980841	118	90	69	76
chr1_82008769_82018557	160	153	89	116
chr1_82038380_82043546	40	49	25	38
chr1_82044624_82047347	30	19	27	27
chr1_82126632_82133225	86	61	46	70
chr1_82140101_82141783	20	15	17	23
chr1_82143643_82149565	84	108	51	80
chr1_82165260_82166712	8	20	18	16
chr1_82166974_82170892	34	26	20	29
chr1_82207663_82209889	36	20	14	22
chr1_82222016_82225486	31	35	36	21
chr1_82229563_82230806	12	8	15	13
chr1_82245192_82247870	32	42	21	23
chr1_82264597_82267485	35	36	21	37
chr1_82342970_82347655	34	60	29	47
chr1_82377638_82379246	10	24	19	5
chr1_82428575_82434738	61	49	42	54
chr1_82439458_82447828	148	171	101	133
chr1_82949780_82953230	51	46	32	29
chr1_83302751_83304447	15	21	20	12
chr1_83309965_83317612	98	74	63	68
chr1_83442997_83447924	49	56	33	45
chr1_83674073_83675649	30	28	19	30
chr1_83681066_83684361	50	45	29	40
chr1_84083282_84084916	17	24	9	15
chr1_84155777_84157129	16	5	7	17
chr1_84158700_84161462	40	60	15	37
chr1_84303358_84305040	19	18	8	11
chr1_84350934_84352821	17	27	15	14
chr1_84392081_84394493	15	29	20	16
chr1_84568185_84570296	26	19	24	18
chr1_84639058_84640837	8	23	16	11
chr1_84971132_84972891	20	17	5	12
chr1_85138861_85143456	52	69	42	52
chr1_85163781_85165348	18	15	22	13
chr1_85609624_85610983	23	17	6	15
chr1_85666423_85668511	21	30	17	27
chr1_85671841_85673363	16	22	10	8
chr1_85689781_85692040	17	29	24	28
chr1_85794185_85797030	28	35	18	24
chr1_85807753_85812436	65	66	45	49
chr1_85877404_85878734	20	15	14	10
chr1_85991628_85993789	23	24	19	18
chr1_86010180_86012714	32	38	32	15
chr1_86048984_86052190	44	46	22	31
chr1_86071893_86074950	47	46	23	24
chr1_86093666_86096277	22	43	25	26
chr1_86133776_86135120	13	18	8	9
chr1_86968112_86969600	14	23	10	22
chr1_87378852_87380852	24	21	9	18
chr1_87397464_87400848	34	36	45	24
chr1_87403549_87405919	26	21	27	16
chr1_87817150_87819018	13	28	21	17
chr1_87893021_87894826	28	31	23	21
chr1_88107760_88110847	51	47	17	29
chr1_88406610_88408443	18	19	9	17
chr1_88599499_88603818	58	54	40	48
chr1_89030465_89033327	20	45	16	28
chr1_89238704_89244367	89	78	55	64
chr1_89457539_89459826	32	33	26	10
chr1_89566277_89567306	4	15	2	11
chr1_89704356_89706570	34	17	16	35
chr1_90063850_90065691	22	36	15	16
chr1_90286803_90290266	19	38	23	17
chr1_90328151_90329767	17	26	13	15
chr1_90368823_90378887	115	166	99	108
chr1_90382987_90385800	30	31	14	23
chr1_90394212_90399187	60	66	42	37
chr1_90403875_90406084	25	39	25	20
chr1_90407779_90409474	14	23	7	15
chr1_90414853_90416569	11	21	8	20
chr1_90460272_90462800	23	28	15	16
chr1_91388740_91394702	82	86	42	49
chr1_91438397_91441229	43	30	29	15
chr1_91484007_91488929	64	70	47	43
chr1_91568467_91572408	62	48	45	51
chr1_91577198_91578852	16	8	10	21
chr1_91584936_91593629	140	157	76	106
chr1_91605088_91606548	10	5	18	19
chr1_91965511_91968340	34	35	16	33
chr1_92109317_92111974	30	32	14	22
chr1_92763837_92765416	23	26	14	8
chr1_93257197_93258484	17	23	12	9
chr1_93297383_93298807	11	28	20	21
chr1_93465715_93467250	13	17	8	22
chr1_93576378_93578001	25	14	21	12
chr1_93589615_93591884	29	38	23	29
chr1_93740659_93744462	49	64	48	40
chr1_93810630_93811895	22	14	8	13
chr1_93815876_93817523	15	19	11	7
chr1_93875559_93877964	43	33	18	19
chr1_93913166_93918608	60	63	27	41
chr1_94080769_94083128	25	34	14	20
chr1_94100603_94103066	37	32	25	27
chr1_94109533_94112530	47	46	29	40
chr1_94127305_94128510	14	19	16	8
chr1_94279966_94281582	17	23	11	10
chr1_94344124_94346182	18	34	16	11
chr1_94353544_94357478	38	54	33	36
chr1_95123062_95124485	14	20	17	18
chr1_95125364_95128794	77	61	43	46
chr1_95219031_95220123	9	19	10	11
chr1_95330094_95333433	46	57	39	46
chr1_95349163_95350836	22	27	18	18
chr1_95391536_95393078	18	36	11	18
chr1_95401141_95404468	34	45	28	34
chr1_95436055_95437837	23	21	9	17
chr1_95746701_95749375	47	30	25	36
chr1_95871383_95877332	73	80	53	85
chr1_96466820_96470507	59	53	35	65
chr1_96652454_96653889	19	12	15	17
chr1_96746528_96748063	15	14	5	14
chr1_96984708_96989916	77	57	27	35
chr1_97009652_97012364	39	38	24	40
chr1_97022485_97031355	115	123	91	108
chr1_97045800_97048969	33	37	20	39
chr1_97180263_97182182	26	12	10	18
chr1_97186741_97189071	35	33	14	15
chr1_98740807_98745992	66	72	51	54
chr1_98968033_98970371	34	17	24	19
chr1_99980677_99981999	13	22	13	17
chr1_100191619_100194682	36	36	18	17
chr1_100503161_100504654	19	25	13	16
chr1_100769917_100771538	25	23	10	16
chr1_100790441_100791576	13	21	4	12
chr1_100816294_100817673	14	26	5	8
chr1_100876290_100878032	13	27	14	14
chr1_101490400_101492265	27	25	12	12
chr1_102118512_102120970	33	23	18	17
chr1_103713610_103717129	29	48	21	23
chr1_107057774_107059725	10	12	21	26
chr1_107065421_107069529	48	49	29	46
chr1_107288299_107289999	18	22	20	19
chr1_107717529_107719350	15	25	12	14
chr1_107736461_107739373	46	43	46	36
chr1_107768702_107770813	16	29	14	21
chr1_107796093_107798332	19	16	14	24
chr1_107974321_107976004	18	19	9	16
chr1_108345521_108347947	24	18	16	30
chr1_109223737_109225120	17	14	18	6
chr1_109234143_109236204	27	37	9	15
chr1_109358532_109359608	17	16	8	4
chr1_109489417_109492141	36	33	18	25
chr1_109771296_109774060	30	25	19	27
chr1_109897178_109898424	11	16	8	13
chr1_109913863_109915213	14	20	10	5
chr1_109924716_109927697	42	31	26	29
chr1_110419207_110420785	25	22	11	7
chr1_110545570_110547373	21	42	12	14
chr1_110880412_110882347	26	25	10	12
chr1_111458834_111459999	9	16	8	13
chr1_111906125_111909560	58	57	22	48
chr1_112079803_112081664	20	20	15	17
chr1_112938243_112939706	16	26	8	14
chr1_112946095_112947949	18	23	19	7
chr1_113160887_113162828	26	25	19	12
chr1_113213132_113215359	34	33	12	18
chr1_113348242_113352763	40	59	42	55
chr1_113359062_113366446	103	111	67	102
chr1_113414869_113417371	24	28	23	27
chr1_113422715_113423969	12	16	5	14
chr1_113447570_113449092	15	15	11	16
chr1_113452777_113455499	35	32	29	19
chr1_113569099_113571937	37	61	28	32
chr1_113582653_113588306	115	118	68	87
chr1_113595867_113599404	41	34	21	43
chr1_113614347_113616726	22	39	15	19
chr1_113742076_113744979	38	32	21	36
chr1_113796387_113799486	30	36	20	40
chr1_114518019_114523205	53	61	36	55
chr1_114563953_114567177	35	43	18	25
chr1_114573603_114583506	180	202	83	143
chr1_114616845_114622714	81	66	36	59
chr1_114631189_114632330	13	15	3	5
chr1_115299115_115301032	20	40	18	24
chr1_115641650_115643295	17	13	11	17
chr1_117239264_117240447	17	17	6	4
chr1_117254234_117255962	23	23	11	7
chr1_117374712_117376757	27	18	13	18
chr1_117394132_117399671	69	62	37	59
chr1_117601499_117603024	17	21	7	10
chr1_117634926_117637533	23	55	19	22
chr1_117670361_117671860	16	28	12	17
chr1_117711850_117715718	53	42	32	31
chr1_117791941_117794677	21	18	12	33
chr1_117809632_117815539	67	68	58	58
chr1_118049717_118051068	14	16	10	18
chr1_118619012_118621627	30	41	14	29
chr1_119585296_119586395	13	5	7	12
chr1_119682704_119684020	16	21	15	11
chr1_119873683_119876171	19	31	17	23
chr1_119882335_119885038	40	45	17	25
chr1_119889753_119891053	18	14	12	14
chr1_120187645_120189225	18	32	12	9
chr1_120215491_120218831	43	41	33	37
chr1_120229920_120233293	48	46	23	37
chr1_120255100_120256492	14	21	6	8
chr1_121297563_121301892	61	55	41	47
chr1_121483040_121485796	4660	6052	6774	3683
chr1_144006484_144014755	86	145	105	68
chr1_144527634_144529983	25	35	27	14
chr1_144886674_144888233	18	35	8	5
chr1_144911625_144914761	37	33	32	19
chr1_144926326_144928770	30	47	31	16
chr1_144931626_144933889	20	42	23	30
chr1_144935587_144944208	104	109	89	105
chr1_144985951_144996763	150	209	146	110
chr1_144996800_145031592	407	584	448	325
chr1_145033560_145035647	23	18	30	8
chr1_145038302_145047941	80	91	122	49
chr1_145055691_145062677	59	90	80	43
chr1_145064190_145066675	27	33	39	15
chr1_145068611_145073657	37	53	58	42
chr1_145078746_145080833	20	21	18	10
chr1_145091152_145093329	25	37	16	23
chr1_145096077_145100312	41	68	40	54
chr1_145109129_145118575	106	152	131	115
chr1_145289050_145294524	57	78	86	43
chr1_145455465_145456974	21	22	18	12
chr1_147010506_147013981	47	50	32	32
chr1_147036982_147042219	68	91	58	70
chr1_147304996_147309322	42	56	22	45
chr1_147734950_147737638	28	45	19	15
chr1_147806286_147807577	24	28	12	17
chr1_149815048_149818714	52	66	24	47
chr1_149820508_149821714	17	12	10	10
chr1_149855499_149861199	77	99	52	53
chr1_149899131_149900681	22	34	19	17
chr1_149910176_149911469	17	20	6	15
chr1_149967347_149969051	19	22	17	12
chr1_149981020_149983223	28	27	14	11
chr1_150021703_150023138	16	14	17	15
chr1_150134105_150136797	53	86	32	31
chr1_150207629_150209822	24	38	16	12
chr1_150227569_150230901	45	61	35	33
chr1_150244182_150245671	19	17	9	8
chr1_150274177_150276412	34	62	16	19
chr1_150334942_150339722	57	69	33	31
chr1_150459231_150460934	17	13	9	12
chr1_150533763_150536410	35	34	21	22
chr1_150538681_150542593	61	63	39	48
chr1_150550700_150552806	23	53	14	21
chr1_150575924_150578419	52	64	28	32
chr1_150581463_150582990	14	14	20	11
chr1_150601167_150603754	11	40	15	18
chr1_150604426_150609091	62	67	21	45
chr1_150612702_150615837	62	54	18	43
chr1_150884531_150885964	24	17	18	11
chr1_150953426_150955575	28	29	14	20
chr1_151031946_151033673	23	21	14	14
chr1_151042492_151043821	19	15	7	15
chr1_151170599_151171936	14	20	10	8
chr1_151266482_151268872	39	49	25	39
chr1_151299415_151301456	17	36	21	19
chr1_151318385_151320512	25	44	16	10
chr1_151430208_151432978	29	37	8	17
chr1_151485810_151490006	45	56	34	38
chr1_151511142_151512849	19	21	14	15
chr1_151518548_151520756	29	44	20	17
chr1_151781751_151783323	16	17	10	12
chr1_153094870_153096030	19	16	10	16
chr1_153105989_153109825	54	57	31	60
chr1_153438428_153439548	15	11	2	16
chr1_153537924_153539570	21	18	9	12
chr1_153606075_153607496	13	24	14	6
chr1_153669246_153670840	20	27	14	16
chr1_153715590_153720218	35	73	40	49
chr1_153747409_153748969	18	15	6	14
chr1_153934871_153937286	35	39	25	21
chr1_153939825_153941387	13	20	10	16
chr1_153962594_153964076	17	22	10	11
chr1_154155831_154160890	73	72	45	43
chr1_154192093_154194184	21	32	15	25
chr1_154528382_154529710	6	14	5	11
chr1_154579526_154583013	37	55	32	36
chr1_154599847_154601055	14	22	10	6
chr1_154908693_154910813	27	42	9	6
chr1_154927523_154929255	16	17	16	4
chr1_154941267_154948111	92	163	59	71
chr1_154955417_154956813	13	27	13	7
chr1_154988923_154990563	22	27	6	8
chr1_155163004_155167225	44	57	26	31
chr1_155278228_155279369	15	21	2	8
chr1_155658145_155659222	13	16	9	12
chr1_155829731_155831157	15	23	11	4
chr1_155903556_155905155	16	29	7	13
chr1_155936729_155938813	12	29	18	9
chr1_155947210_155948596	19	21	15	12
chr1_156049952_156052806	26	34	9	17
chr1_156091871_156094167	24	42	22	17
chr1_156095489_156097125	15	16	7	13
chr1_156151028_156153125	29	36	17	12
chr1_156181593_156184151	32	46	13	14
chr1_156470149_156475828	65	86	32	46
chr1_156629938_156635930	77	105	46	59
chr1_156642185_156645535	39	77	26	32
chr1_156677044_156681707	34	55	24	30
chr1_156715795_156722406	68	98	48	55
chr1_156735677_156738136	29	32	13	20
chr1_157108044_157109562	21	19	14	7
chr1_157130500_157133730	63	72	51	40
chr1_157210569_157211616	15	17	8	11
chr1_157294685_157297636	36	47	22	29
chr1_157535118_157536956	23	22	24	24
chr1_157952315_157953653	18	16	6	11
chr1_157970319_157973484	27	47	32	22
chr1_157986252_157990836	62	95	35	56
chr1_158070082_158078107	98	123	67	102
chr1_158390505_158395086	71	82	35	65
chr1_160064578_160067232	38	47	15	22
chr1_160138282_160140560	20	32	19	30
chr1_160231057_160232875	23	37	17	25
chr1_160254196_160255487	14	20	7	8
chr1_160312370_160313989	22	23	13	6
chr1_160330745_160334251	40	82	35	23
chr1_160368871_160371043	30	34	20	23
chr1_160621739_160623390	16	30	17	16
chr1_160640046_160646026	93	101	40	73
chr1_160956487_160958030	23	21	12	14
chr1_161015169_161016514	21	19	12	12
chr1_161122903_161124499	28	24	15	19
chr1_161168019_161173168	77	87	50	57
chr1_161283654_161285035	20	20	8	9
chr1_162114193_162118237	55	64	41	39
chr1_162141275_162142649	11	19	9	13
chr1_162219004_162222043	55	43	26	41
chr1_162601381_162603721	35	47	16	23
chr1_162665590_162667682	27	31	18	17
chr1_163169039_163175415	97	98	54	100
chr1_163246307_163247820	17	18	7	6
chr1_163266045_163268045	14	30	24	18
chr1_163368710_163371215	38	28	23	36
chr1_163530794_163532092	8	18	7	13
chr1_163532709_163537317	65	49	32	28
chr1_163564976_163568595	75	51	40	54
chr1_163862834_163864561	10	21	8	14
chr1_164279018_164281298	31	27	11	24
chr1_164385412_164388506	31	29	19	21
chr1_164528603_164529804	11	7	9	15
chr1_164544681_164549344	59	67	32	39
chr1_164551882_164554819	22	47	19	15
chr1_164560539_164563197	31	33	20	25
chr1_164570516_164572338	22	28	13	14
chr1_164617223_164618666	13	21	17	15
chr1_164739952_164742877	45	48	25	22
chr1_164755536_164757217	17	28	8	11
chr1_165796904_165798872	23	41	12	20
chr1_166496707_166498264	23	23	18	17
chr1_167107195_167109881	18	21	17	24
chr1_167126112_167127889	20	13	12	22
chr1_167132091_167137278	50	77	36	40
chr1_167188265_167192064	47	52	18	48
chr1_167194189_167196635	31	27	21	30
chr1_167254947_167258121	30	32	28	20
chr1_167297112_167298567	9	18	17	11
chr1_167334267_167336081	17	21	17	15
chr1_167674347_167679015	44	42	23	27
chr1_167690066_167691996	17	18	6	13
chr1_167764759_167766958	29	26	13	12
chr1_167790763_167792355	17	18	10	10
chr1_167880843_167882466	19	14	16	12
chr1_167905593_167907522	21	27	11	25
chr1_168254474_168255719	13	20	4	6
chr1_168887069_168889831	36	17	18	24
chr1_169255989_169259854	54	55	40	48
chr1_169448108_169450908	26	36	18	20
chr1_169496941_169500283	34	45	37	32
chr1_169749219_169751374	19	33	25	19
chr1_169763118_169765611	31	32	24	13
chr1_169862464_169863872	12	15	14	16
chr1_169918389_169921328	33	30	23	33
chr1_170531634_170533065	9	23	17	18
chr1_171187260_171193724	95	103	55	72
chr1_171263174_171270387	83	128	50	74
chr1_171389457_171390647	12	13	10	12
chr1_171454010_171455665	13	23	16	13
chr1_171722598_171724361	23	28	10	17
chr1_171875791_171882293	95	88	51	83
chr1_171902199_171903488	7	23	14	11
chr1_171906034_171913975	61	83	63	80
chr1_171916473_171918624	29	27	18	27
chr1_171920097_171921759	27	16	9	18
chr1_171935224_171940921	62	63	47	44
chr1_171963300_171964623	4	18	6	15
chr1_172153472_172156281	41	35	30	26
chr1_172326874_172331069	47	54	36	49
chr1_172351958_172353475	11	12	20	16
chr1_172501084_172503081	28	30	15	11
chr1_172506673_172508163	19	14	16	13
chr1_172549927_172553314	36	40	19	24
chr1_172683232_172684275	11	19	9	9
chr1_173650802_173652618	17	30	15	21
chr1_173834101_173837559	52	77	37	30
chr1_173856543_173859917	36	42	27	35
chr1_174739642_174741052	15	13	12	12
chr1_174838207_174847515	157	123	107	130
chr1_174968032_174969579	26	24	12	15
chr1_175098258_175100755	36	47	17	22
chr1_176175262_176176896	18	23	9	8
chr1_176210113_176211826	18	25	13	15
chr1_178029995_178031695	14	22	14	17
chr1_178091934_178093632	21	18	6	9
chr1_178222080_178225323	46	31	24	22
chr1_178230842_178237663	82	100	73	68
chr1_178239376_178241546	28	29	28	25
chr1_178242856_178245269	27	32	20	19
chr1_178246600_178254090	92	102	72	77
chr1_178309129_178312982	59	45	31	46
chr1_178837351_178841229	52	34	27	41
chr1_179027227_179029028	17	31	10	16
chr1_179497061_179499844	39	23	12	30
chr1_179801842_179804079	24	14	18	12
chr1_179850341_179852824	29	31	12	21
chr1_180205901_180210794	80	77	29	37
chr1_180454680_180457779	24	31	25	29
chr1_180470964_180472372	26	25	12	10
chr1_180891611_180895895	33	54	29	23
chr1_181938171_181941379	65	46	37	44
chr1_181997935_182000245	25	26	13	14
chr1_182052541_182054072	17	18	7	11
chr1_182069491_182072624	57	58	20	35
chr1_182360333_182361823	12	21	5	20
chr1_182878795_182880108	16	17	7	12
chr1_182926038_182928401	40	38	19	20
chr1_182931224_182932563	16	17	6	15
chr1_183060379_183061979	9	24	10	14
chr1_183065779_183068289	36	36	24	15
chr1_183289156_183290553	26	17	15	19
chr1_183371654_183374030	30	47	25	28
chr1_183465445_183468796	21	43	22	19
chr1_183514679_183517097	38	23	24	5
chr1_183840019_183842543	24	30	13	26
chr1_184015768_184017085	13	13	15	10
chr1_184019795_184021536	19	29	9	26
chr1_184031202_184033426	24	19	18	18
chr1_184036396_184039875	44	32	18	41
chr1_184281283_184283215	14	11	14	4
chr1_184351859_184355724	63	59	27	47
chr1_184373542_184376328	32	33	13	16
chr1_184421981_184425428	32	50	30	27
chr1_184447769_184451840	49	70	30	40
chr1_184454880_184456970	18	38	16	19
chr1_184466108_184470613	49	57	42	30
chr1_184635250_184644767	109	134	93	98
chr1_184660225_184665952	39	49	48	45
chr1_184729008_184730244	13	10	13	3
chr1_185023330_185024343	11	16	3	4
chr1_185042246_185045672	51	45	31	35
chr1_185369414_185371100	11	23	12	19
chr1_185613482_185617128	52	55	32	32
chr1_185719695_185721015	19	21	9	7
chr1_185812162_185814218	28	29	18	23
chr1_185878055_185885231	86	88	64	86
chr1_185907501_185909551	21	16	19	22
chr1_185923444_185925075	13	15	19	21
chr1_186840733_186842182	22	20	17	8
chr1_186978486_186980426	25	21	14	16
chr1_187197509_187199610	12	23	22	8
chr1_187438777_187440731	18	21	18	23
chr1_187592327_187595935	63	39	24	36
chr1_189283445_189285516	32	28	15	17
chr1_189374572_189375826	14	8	9	15
chr1_190410939_190412326	12	7	14	17
chr1_192094647_192096064	15	20	12	19
chr1_192507978_192509806	20	19	15	18
chr1_192807609_192810016	36	28	23	29
chr1_192989915_192991532	16	23	8	6
chr1_193560620_193565634	48	63	42	66
chr1_193598047_193600038	15	23	10	10
chr1_193648681_193649960	18	12	9	13
chr1_194142019_194146773	72	69	46	63
chr1_195305260_195307250	22	18	21	23
chr1_195816238_195820656	71	63	48	58
chr1_195908613_195910065	15	18	13	12
chr1_195970855_195973708	21	35	23	39
chr1_196271439_196273025	18	19	9	17
chr1_196275151_196277150	13	25	25	28
chr1_196296587_196297717	3	15	13	7
chr1_196311506_196316205	46	48	31	38
chr1_196341777_196343378	15	21	10	13
chr1_196416171_196422930	73	66	56	64
chr1_197097774_197100450	35	32	19	23
chr1_197476023_197477627	18	14	23	8
chr1_198200801_198202674	23	25	14	17
chr1_198223893_198225416	11	25	12	17
chr1_198267906_198269869	20	23	15	21
chr1_198376464_198377551	8	16	13	12
chr1_198488122_198491512	38	45	40	32
chr1_198620274_198624293	50	26	38	37
chr1_198650989_198652191	8	18	5	15
chr1_198669326_198671613	24	39	14	14
chr1_198697031_198698704	19	14	20	18
chr1_199129596_199131828	36	33	23	18
chr1_199945692_199948445	23	26	16	26
chr1_200016312_200019767	49	40	23	35
chr1_200305339_200307699	28	27	28	21
chr1_200330678_200335844	119	89	54	74
chr1_200337193_200344672	92	99	80	54
chr1_200356592_200363305	72	62	65	67
chr1_200378602_200382548	59	73	40	42
chr1_200530851_200532183	16	22	8	7
chr1_200771049_200775147	33	39	35	35
chr1_200859899_200866976	94	106	49	58
chr1_201343914_201347256	36	60	28	42
chr1_201468778_201474279	55	89	50	56
chr1_201604764_201606309	13	19	11	3
chr1_201704914_201709446	41	57	25	29
chr1_201719256_201720573	13	9	11	16
chr1_201722794_201723953	13	13	16	7
chr1_201910185_201911542	16	19	8	15
chr1_201975794_201979532	29	64	34	32
chr1_202073830_202075666	19	32	8	8
chr1_202328396_202332984	51	52	24	40
chr1_202333985_202335548	17	25	17	13
chr1_202348020_202350440	20	33	19	30
chr1_202473438_202475932	36	51	27	22
chr1_202507096_202509096	20	23	19	13
chr1_202530448_202541397	132	181	103	115
chr1_202543145_202548657	72	91	46	48
chr1_203116396_203119245	38	29	17	18
chr1_203559853_203561753	18	25	18	9
chr1_203764441_203766439	21	42	21	23
chr1_203830591_203831849	13	17	19	11
chr1_203953528_203955586	30	29	14	29
chr1_204034074_204035682	20	25	16	8
chr1_204046380_204053934	82	112	64	67
chr1_204070341_204072649	21	32	13	14
chr1_204076978_204079217	35	16	14	24
chr1_204116012_204117651	13	27	12	12
chr1_204223286_204225761	25	31	9	21
chr1_204272254_204274607	32	35	30	21
chr1_204379972_204382214	30	34	10	18
chr1_204476030_204477603	12	26	15	14
chr1_204484767_204486428	23	31	15	15
chr1_204542526_204544507	25	18	14	22
chr1_204891374_204897318	58	99	59	58
chr1_205090516_205091932	13	20	11	17
chr1_205243700_205245466	14	22	6	19
chr1_205252405_205256673	58	50	27	39
chr1_205259890_205273242	229	298	155	146
chr1_205281473_205283721	36	36	16	18
chr1_205293888_205295126	7	15	7	14
chr1_205412859_205415504	42	55	27	28
chr1_205600113_205601188	14	16	6	10
chr1_205638121_205646002	80	133	47	79
chr1_205901770_205903316	21	25	5	7
chr1_207803401_207810284	105	95	64	90
chr1_207924183_207925687	16	24	10	13
chr1_208282057_208283404	17	17	8	7
chr1_209329476_209330696	15	14	3	14
chr1_209548526_209550433	21	14	18	23
chr1_209556210_209561206	62	61	37	51
chr1_209577076_209580124	45	46	23	31
chr1_209605607_209609271	39	48	38	38
chr1_210057489_210058513	12	5	11	11
chr1_210245571_210248443	31	32	23	32
chr1_210289629_210292044	32	25	14	34
chr1_210546973_210548330	17	25	9	19
chr1_211429567_211433064	58	61	29	41
chr1_211572543_211574657	24	25	17	28
chr1_211934016_211935321	14	24	8	6
chr1_212277580_212280921	32	55	26	31
chr1_213051631_213053762	29	28	17	20
chr1_213078851_213083695	107	103	66	62
chr1_213087735_213090966	65	69	36	30
chr1_213100690_213102598	24	21	13	21
chr1_213126624_213127897	15	9	8	11
chr1_214551918_214553425	22	21	8	6
chr1_214576469_214579941	41	52	41	48
chr1_214590711_214595865	55	67	42	45
chr1_214611928_214623003	194	197	107	133
chr1_214624828_214627191	23	29	25	26
chr1_214723742_214727594	48	69	36	45
chr1_215823146_215825013	22	21	8	29
chr1_215939590_215942602	44	39	31	42
chr1_216266996_216270493	31	27	27	33
chr1_216355272_216358458	39	46	36	27
chr1_216912788_216914510	25	25	11	18
chr1_216997869_216999053	15	2	7	13
chr1_217027725_217031979	64	47	48	42
chr1_217056701_217058393	19	14	5	17
chr1_217108970_217111480	23	30	16	24
chr1_217117614_217120201	47	35	26	30
chr1_218427150_218428393	9	19	13	6
chr1_218468146_218476749	96	91	73	94
chr1_218486165_218487649	15	19	8	12
chr1_218632838_218634754	16	20	21	13
chr1_218667231_218669808	34	36	21	21
chr1_220006112_220007952	22	39	18	16
chr1_220445332_220449066	57	44	37	51
chr1_220501041_220504094	30	34	17	20
chr1_220508837_220514059	89	83	50	82
chr1_220804047_220806129	15	22	16	24
chr1_221341252_221344362	36	29	25	41
chr1_221464370_221466662	35	32	14	15
chr1_222995401_223002344	72	85	64	54
chr1_223016094_223018940	58	45	32	36
chr1_223095506_223099825	39	45	41	36
chr1_223101630_223105311	31	34	30	37
chr1_223180114_223186375	80	72	57	56
chr1_223195107_223198241	49	46	34	31
chr1_223203049_223205776	49	64	26	34
chr1_223247945_223249250	12	20	12	21
chr1_223833393_223835803	23	31	6	15
chr1_224301383_224302966	19	29	8	12
chr1_224350871_224353103	30	23	25	24
chr1_224399993_224402659	24	45	12	28
chr1_224421272_224429181	79	115	65	82
chr1_224443842_224445993	21	26	14	20
chr1_224526404_224527571	14	19	8	15
chr1_224684897_224687338	49	54	27	36
chr1_224690603_224692263	23	14	10	21
chr1_224988238_224989656	20	25	14	12
chr1_225695680_225697471	29	24	20	14
chr1_225719593_225721904	23	32	21	21
chr1_225765588_225766854	9	19	12	14
chr1_225839867_225841422	15	23	5	18
chr1_225965048_225966898	28	34	20	16
chr1_226076713_226078584	19	23	12	23
chr1_226084597_226088571	51	60	27	31
chr1_226248781_226251787	28	46	18	29
chr1_226299545_226301339	27	24	17	14
chr1_226495727_226497589	19	24	6	21
chr1_226590836_226596847	58	76	44	50
chr1_226841268_226843061	19	26	8	16
chr1_227503807_227507158	44	35	16	22
chr1_227544061_227546375	27	44	22	24
chr1_227751015_227752224	14	19	14	12
chr1_228336597_228337701	7	16	3	12
chr1_228352811_228354239	10	29	6	14
chr1_229227241_229231469	56	63	42	47
chr1_229315214_229316998	19	31	19	11
chr1_229323624_229328685	83	87	42	41
chr1_229364456_229367984	42	47	23	35
chr1_229388691_229390010	10	19	9	16
chr1_229829675_229832850	38	35	25	18
chr1_230151671_230154687	40	37	18	19
chr1_230237295_230238982	18	25	17	9
chr1_230305393_230307277	28	26	13	13
chr1_230320959_230322141	13	21	16	3
chr1_230386405_230388120	26	32	10	12
chr1_230467760_230468920	9	21	5	13
chr1_230517764_230519160	17	19	9	10
chr1_230563301_230566366	33	30	22	42
chr1_231004204_231005539	15	18	18	2
chr1_232259265_232264407	62	80	37	61
chr1_232267080_232270958	54	52	36	43
chr1_232414457_232417970	39	34	23	31
chr1_232608156_232610082	25	31	15	22
chr1_233247366_233251797	91	101	73	72
chr1_233424758_233429102	44	54	32	51
chr1_233500903_233504890	58	74	30	41
chr1_233605965_233607660	30	23	12	20
chr1_233609464_233611941	31	18	19	19
chr1_233658062_233659968	21	24	10	19
chr1_234651017_234652341	16	25	17	12
chr1_234746210_234748082	19	25	12	16
chr1_234752248_234756120	42	66	34	40
chr1_234912708_234919457	70	93	99	51
chr1_235090787_235094063	38	40	14	21
chr1_235122216_235124379	32	28	21	14
chr1_235252725_235254923	36	29	14	15
chr1_235291501_235292752	24	29	5	13
chr1_235361129_235363854	30	47	23	26
chr1_235824939_235826461	17	20	7	12
chr1_236666111_236667478	17	28	7	8
chr1_237115377_237116535	12	15	8	6
chr1_237172116_237174259	27	29	17	28
chr1_237178316_237182549	87	55	34	61
chr1_237402055_237403912	23	30	11	19
chr1_237441897_237442964	10	19	11	10
chr1_237450847_237452709	22	26	16	13
chr1_237502826_237505732	27	39	23	18
chr1_237996378_237998373	25	19	11	20
chr1_238189928_238193753	42	35	21	35
chr1_238338362_238342460	52	47	31	35
chr1_238417386_238418922	27	16	12	12
chr1_238540291_238544968	60	56	30	62
chr1_238647212_238649715	25	22	14	24
chr1_238766928_238768169	12	4	5	13
chr1_238808804_238814088	81	117	62	87
chr1_238915210_238916951	12	27	16	23
chr1_239268971_239272211	55	51	27	46
chr1_239287376_239290214	28	26	28	28
chr1_239305578_239307204	14	21	17	15
chr1_239309591_239312312	31	17	15	19
chr1_239396623_239398429	19	27	15	10
chr1_239405479_239407625	34	20	18	13
chr1_239936859_239939263	32	39	15	19
chr1_239977328_239978908	15	24	12	14
chr1_240077470_240079797	22	21	23	31
chr1_240467104_240468310	2	16	15	3
chr1_240793397_240794845	12	21	7	10
chr1_241174419_241177667	48	45	32	44
chr1_241196561_241198481	22	13	29	13
chr1_241207947_241209840	21	21	20	25
chr1_241277335_241279192	25	30	16	25
chr1_241365474_241368216	27	18	17	31
chr1_242246358_242252647	79	85	53	52
chr1_242358704_242360360	20	16	13	19
chr1_242375602_242377527	24	22	11	17
chr1_242609574_242614693	55	58	49	41
chr1_242747513_242749764	38	32	18	24
chr1_242756637_242758418	18	21	23	14
chr1_243330397_243332119	36	31	22	28
chr1_243447558_243448866	14	28	15	17
chr1_243478721_243479755	9	18	14	10
chr1_243652712_243657253	60	77	42	44
chr1_243879673_243880839	11	18	16	9
chr1_243899317_243905355	82	94	55	92
chr1_243908971_243911658	28	32	12	33
chr1_244013634_244014776	18	16	3	16
chr1_244184236_244186400	27	20	9	18
chr1_244326090_244327916	14	18	22	18
chr1_244516354_244518134	17	16	20	20
chr1_244524076_244526272	24	42	22	23
chr1_244608243_244612282	39	47	25	30
chr1_244898385_244900428	28	22	10	13
chr1_244997276_244999555	32	51	15	20
chr1_245026788_245029014	22	34	16	20
chr1_245131660_245135742	42	62	26	43
chr1_246595937_246600003	59	48	23	36
chr1_247538976_247541684	26	22	25	38
chr10_1033781_1035329	13	27	7	6
chr10_1082130_1083696	15	18	19	6
chr10_1094559_1096107	9	16	5	17
chr10_1350303_1355723	98	154	46	60
chr10_1402503_1404599	19	23	4	23
chr10_2243014_2245443	26	36	18	31
chr10_3538541_3540323	22	12	13	20
chr10_3741492_3742505	12	17	6	9
chr10_3827016_3829104	27	46	11	21
chr10_3871519_3872961	16	23	16	11
chr10_4695461_4696719	13	14	4	14
chr10_5507407_5509395	33	36	9	16
chr10_6137955_6140220	28	28	18	24
chr10_6407434_6408483	8	15	5	11
chr10_6689784_6692392	42	26	21	26
chr10_6763940_6765253	21	18	8	6
chr10_6837702_6838972	10	18	7	19
chr10_7676476_7679457	34	38	31	37
chr10_7896388_7897907	15	23	12	15
chr10_7984677_7988179	23	43	18	23
chr10_8330470_8332303	14	21	11	15
chr10_9550905_9553905	30	31	15	39
chr10_9586439_9588429	32	32	14	20
chr10_10206085_10209885	43	40	24	44
chr10_10334882_10336668	18	18	19	17
chr10_10402111_10404928	45	37	27	32
chr10_10833959_10835541	24	23	14	8
chr10_10838245_10840098	23	19	11	11
chr10_11076572_11078175	23	32	9	5
chr10_11137209_11139022	12	25	19	11
chr10_11184792_11188598	39	33	22	36
chr10_11233919_11237416	28	53	24	26
chr10_11474146_11479798	45	75	35	47
chr10_11510218_11513023	38	60	23	32
chr10_11976863_11979977	34	49	24	38
chr10_12083978_12085605	29	26	13	11
chr10_12237372_12238802	17	9	7	14
chr10_12808469_12810803	21	38	22	28
chr10_13387287_13395749	117	140	56	80
chr10_13656103_13659348	36	47	15	18
chr10_13713892_13716255	25	30	17	24
chr10_13748733_13750057	12	20	9	14
chr10_13799157_13802512	46	51	25	28
chr10_13829897_13831011	13	17	9	8
chr10_13922973_13926181	51	57	17	40
chr10_14013947_14016054	30	34	15	20
chr10_14226410_14228254	32	32	19	18
chr10_14466413_14473289	100	100	59	74
chr10_14619642_14621588	19	24	13	12
chr10_14627415_14628869	9	21	11	12
chr10_14920478_14922248	20	23	10	8
chr10_16032718_16034368	11	20	5	16
chr10_16236427_16239521	57	35	22	43
chr10_16283845_16286470	51	45	23	26
chr10_16427549_16430625	54	35	22	23
chr10_16633700_16636651	40	34	28	18
chr10_16898260_16899287	11	16	3	6
chr10_16941359_16943919	41	19	21	24
chr10_17240627_17244470	51	34	28	39
chr10_17251563_17261488	105	129	90	95
chr10_17692378_17693655	14	26	12	3
chr10_17714541_17716525	18	24	14	13
chr10_18382690_18388860	78	62	53	48
chr10_18954484_18957983	51	50	32	35
chr10_19041484_19043571	29	32	18	25
chr10_19407782_19409435	22	8	10	19
chr10_20071645_20079995	101	92	76	74
chr10_20114807_20118924	45	53	38	34
chr10_20124737_20126426	21	28	13	14
chr10_20128052_20133446	67	53	44	48
chr10_20274121_20277912	49	41	30	42
chr10_20403401_20408146	48	43	28	35
chr10_20497916_20499531	16	27	10	12
chr10_20503307_20506087	33	30	29	22
chr10_20547751_20549081	16	17	4	11
chr10_20657736_20661933	79	79	38	72
chr10_20902291_20906172	52	60	38	42
chr10_20982171_20984066	16	25	15	28
chr10_20985494_20989437	43	44	25	30
chr10_21448367_21451591	40	40	25	28
chr10_21566381_21591116	362	413	228	298
chr10_21602406_21608443	91	94	41	55
chr10_21620758_21627866	64	70	39	44
chr10_21651434_21655003	35	73	39	47
chr10_21677134_21681683	57	57	40	46
chr10_21704930_21708099	37	32	25	27
chr10_21797152_21802639	85	83	47	52
chr10_21811147_21823124	179	179	89	137
chr10_21951300_21952913	15	12	19	15
chr10_22015558_22017544	11	31	8	24
chr10_22035826_22043251	80	115	52	54
chr10_22096896_22098377	17	18	13	11
chr10_22264957_22269024	48	46	45	51
chr10_22331119_22332923	28	31	19	21
chr10_22903420_22904447	12	8	6	11
chr10_22912699_22915380	24	40	28	28
chr10_22936123_22937483	15	14	12	20
chr10_22968227_22973497	60	74	43	42
chr10_22977225_22981411	61	76	26	51
chr10_23164102_23166392	27	29	21	23
chr10_23569845_23571012	19	10	10	12
chr10_24259749_24261382	24	25	12	20
chr10_24406921_24408188	16	11	4	11
chr10_24671654_24674704	30	40	21	17
chr10_24782613_24785005	30	34	21	17
chr10_25050679_25052537	29	25	12	26
chr10_25209685_25211007	14	14	9	17
chr10_25240749_25242909	30	28	12	17
chr10_25780050_25783944	71	67	35	58
chr10_26064119_26065976	22	23	14	12
chr10_27148668_27149796	20	17	5	7
chr10_27818022_27819411	13	18	4	8
chr10_28350403_28352472	30	20	15	19
chr10_28407361_28410169	32	40	16	12
chr10_28747480_28749583	31	36	25	16
chr10_28821698_28822881	11	19	3	13
chr10_29097965_29100540	33	32	23	27
chr10_29428676_29431671	51	43	27	37
chr10_29447118_29450187	41	47	27	35
chr10_29771735_29772884	15	21	6	10
chr10_29923105_29924773	20	17	15	19
chr10_29955114_29957642	29	40	19	23
chr10_29974754_29976908	17	16	18	19
chr10_30841564_30843744	24	28	14	28
chr10_31422843_31423926	14	19	4	5
chr10_31953396_31956009	31	38	26	20
chr10_32042806_32044307	17	28	13	13
chr10_32118622_32120024	21	16	8	19
chr10_32289900_32292139	27	22	18	28
chr10_32338339_32342106	43	49	24	29
chr10_32520367_32521769	15	15	18	11
chr10_32554876_32556785	16	26	13	16
chr10_32635046_32636825	28	35	12	26
chr10_33238778_33240945	22	42	14	24
chr10_33246534_33249073	34	41	20	25
chr10_33250536_33252633	29	34	20	27
chr10_33260269_33262441	19	17	17	22
chr10_33293645_33295304	23	19	7	10
chr10_33772112_33774944	47	39	21	24
chr10_33806795_33808676	18	22	14	20
chr10_33986301_33988510	43	39	22	33
chr10_34059959_34063062	38	61	22	23
chr10_34473459_34477187	51	45	29	25
chr10_34814312_34819859	75	100	48	57
chr10_34854537_34857364	25	40	20	32
chr10_34876219_34877470	5	15	6	15
chr10_34901977_34904329	27	32	18	21
chr10_34925269_34926540	14	15	9	6
chr10_35102595_35104405	18	28	8	24
chr10_35329332_35330833	18	22	4	5
chr10_35415468_35417067	15	23	6	12
chr10_35682138_35683911	22	21	22	15
chr10_35709806_35711131	17	22	14	14
chr10_35882292_35884694	37	35	17	23
chr10_35980155_35982233	26	23	17	27
chr10_36457563_36461307	42	32	14	38
chr10_42384115_42387957	398	453	620	306
chr10_42390309_42394943	255	385	442	259
chr10_42398639_42400984	246	269	410	132
chr10_42529203_42530234	74	95	139	74
chr10_42599216_42600313	186	186	292	147
chr10_43507025_43509795	63	49	28	35
chr10_43891018_43893950	25	47	11	20
chr10_44876561_44878098	11	20	9	18
chr10_44894527_44897620	54	25	28	18
chr10_45458802_45461685	25	25	24	29
chr10_45474770_45476453	17	6	9	12
chr10_47033119_47034680	18	20	10	13
chr10_47053709_47058290	37	41	28	25
chr10_47097818_47099612	23	27	11	12
chr10_49606573_49608618	23	29	16	12
chr10_49625427_49626729	14	16	17	9
chr10_49741388_49746568	58	64	31	37
chr10_51036059_51041551	95	84	69	58
chr10_52084368_52086056	17	14	16	16
chr10_52165280_52171579	59	83	50	47
chr10_52229614_52232160	28	31	39	21
chr10_52282234_52283608	15	10	9	13
chr10_52362543_52363572	14	13	3	13
chr10_52377500_52380140	47	30	23	13
chr10_52383922_52386448	24	37	15	24
chr10_52388832_52390675	16	21	23	14
chr10_52838318_52844199	67	61	46	47
chr10_52927671_52929267	14	11	15	9
chr10_52961325_52965034	27	45	29	38
chr10_53003933_53005138	12	18	13	12
chr10_53021890_53024086	33	26	21	28
chr10_53027128_53030411	31	31	20	33
chr10_53322934_53326433	44	32	17	37
chr10_53332099_53335217	40	37	25	27
chr10_53378820_53380080	13	17	12	8
chr10_53458742_53460370	22	27	13	10
chr10_53596996_53598977	29	20	12	21
chr10_53608114_53609443	18	9	7	13
chr10_53791402_53793550	33	25	17	17
chr10_53797782_53807373	143	134	80	110
chr10_53946621_53952045	45	82	39	50
chr10_53967449_53969302	9	16	17	16
chr10_53970839_53975222	59	59	22	52
chr10_54576760_54580178	40	35	16	33
chr10_54612010_54614144	27	21	12	19
chr10_54623181_54624915	26	13	20	11
chr10_54651274_54652764	14	22	17	15
chr10_54662395_54666318	66	52	28	45
chr10_54667558_54670193	32	33	29	21
chr10_54676142_54684530	98	86	70	107
chr10_54709501_54713441	35	51	15	50
chr10_54719033_54723431	47	39	33	43
chr10_54725010_54730993	110	138	52	118
chr10_54780350_54783411	42	52	20	45
chr10_54868028_54869377	15	9	7	17
chr10_54967826_54973848	65	57	48	76
chr10_54983166_54985559	32	20	16	29
chr10_55013916_55017441	30	37	28	41
chr10_55073846_55079713	74	92	66	80
chr10_55097609_55100026	34	43	21	29
chr10_55103255_55107179	42	48	40	41
chr10_55115518_55122846	90	90	63	103
chr10_55123124_55125445	25	14	15	22
chr10_55188069_55192180	41	34	33	40
chr10_55193338_55196692	30	30	32	32
chr10_55212384_55214569	31	16	17	18
chr10_55218385_55227379	101	107	75	123
chr10_55228703_55242830	317	306	185	273
chr10_55247825_55252486	35	51	29	63
chr10_55264642_55270545	113	100	61	129
chr10_55287532_55292730	55	39	42	71
chr10_55355100_55368073	247	236	126	197
chr10_55487457_55488681	13	11	13	5
chr10_56152973_56157684	69	62	37	51
chr10_56196081_56197967	14	25	14	20
chr10_57154399_57155678	22	19	14	10
chr10_57580104_57581372	15	8	11	11
chr10_57738234_57741095	33	24	14	29
chr10_58777541_58779211	21	22	15	11
chr10_58861543_58862612	18	10	4	11
chr10_58979872_58986159	112	82	68	100
chr10_59387243_59389637	37	39	15	16
chr10_59545471_59548336	48	35	19	36
chr10_59808720_59812239	48	55	53	49
chr10_60427490_60428894	16	9	14	20
chr10_61151899_61154164	30	29	23	18
chr10_61315978_61317923	25	19	10	20
chr10_61385489_61387851	31	32	20	18
chr10_61416928_61418365	16	18	11	14
chr10_61603042_61609448	80	76	58	61
chr10_61612004_61613372	15	22	9	10
chr10_61634462_61635603	15	14	8	4
chr10_61665589_61669747	76	67	33	31
chr10_61750463_61752779	30	20	13	24
chr10_61761158_61766371	73	50	43	56
chr10_61898252_61901130	28	53	24	20
chr10_62059219_62060794	20	24	9	8
chr10_62097738_62100197	35	37	27	25
chr10_62280339_62282602	31	24	12	27
chr10_62331561_62333245	13	20	7	20
chr10_62521487_62523790	29	34	20	23
chr10_62537883_62539237	22	15	2	13
chr10_62811194_62813530	32	29	20	15
chr10_62899051_62901077	22	14	18	21
chr10_63165163_63167757	24	25	15	24
chr10_63173556_63177301	65	56	36	50
chr10_63353171_63356160	42	41	14	22
chr10_63401299_63405937	49	69	61	42
chr10_63745428_63747280	25	28	14	17
chr10_64264104_64265131	17	9	7	10
chr10_64384908_64387874	37	29	26	24
chr10_64528796_64530903	28	19	16	19
chr10_65024666_65030372	108	116	73	81
chr10_65193918_65198699	46	54	40	37
chr10_65216629_65217769	10	15	5	10
chr10_65264020_65265510	16	23	12	13
chr10_65274029_65277240	52	64	39	40
chr10_65331595_65334236	31	47	21	24
chr10_65387796_65390879	30	53	28	29
chr10_65430068_65432627	36	38	19	16
chr10_65471760_65476397	45	45	32	50
chr10_68002296_68004255	25	24	16	12
chr10_68137157_68139339	32	14	24	23
chr10_68153183_68154697	11	19	9	18
chr10_68490770_68492143	5	17	7	14
chr10_68560567_68563634	30	20	13	30
chr10_68856716_68860436	29	28	31	44
chr10_68900231_68901363	7	19	9	11
chr10_68915549_68916595	12	16	8	14
chr10_69038535_69040879	19	26	29	30
chr10_69160055_69162656	35	36	16	24
chr10_69368697_69370806	30	30	21	35
chr10_69550054_69551728	24	27	12	16
chr10_69566863_69569218	15	38	22	19
chr10_69615501_69616764	9	18	9	15
chr10_69620117_69623279	63	53	35	36
chr10_69735001_69737569	38	42	26	29
chr10_69846053_69848393	26	21	15	23
chr10_69913245_69914527	22	20	15	9
chr10_70090722_70093009	9	40	18	26
chr10_70230493_70232106	24	35	17	18
chr10_70255822_70257546	16	19	10	18
chr10_70322059_70323818	17	30	10	8
chr10_70359180_70361419	29	23	15	18
chr10_70480571_70482302	27	35	19	9
chr10_70637537_70639321	25	9	16	21
chr10_70660024_70661587	11	30	11	19
chr10_70883085_70884542	8	26	13	16
chr10_70939276_70940650	15	24	7	10
chr10_71083343_71097820	200	224	126	159
chr10_71104229_71106718	30	28	22	19
chr10_72296022_72297183	13	18	7	10
chr10_72382899_72386973	76	58	39	34
chr10_72974912_72978485	39	43	17	22
chr10_73098602_73100563	20	24	9	6
chr10_73102037_73106844	46	73	41	40
chr10_73380387_73382035	26	21	15	13
chr10_73417323_73419512	24	18	18	12
chr10_73619711_73621325	22	28	15	17
chr10_73899383_73901092	22	25	15	12
chr10_73905064_73907114	27	27	12	17
chr10_74014014_74015495	20	15	11	17
chr10_74074444_74075772	15	20	10	12
chr10_74079559_74081574	23	38	20	10
chr10_74092249_74094627	33	38	13	15
chr10_74304907_74306360	18	18	10	6
chr10_74512739_74520606	81	113	47	79
chr10_74541287_74546259	74	90	44	52
chr10_74549235_74555029	88	113	68	77
chr10_74584512_74588480	26	35	30	37
chr10_74644011_74647317	41	37	35	36
chr10_74712081_74713412	9	18	21	12
chr10_74802691_74806640	71	67	46	60
chr10_74927686_74929064	13	23	10	9
chr10_75006095_75008282	22	34	13	17
chr10_75011614_75013221	23	20	8	9
chr10_75255045_75256634	9	21	13	15
chr10_75265172_75267097	24	28	17	26
chr10_75350191_75354444	58	76	44	35
chr10_75502787_75504669	24	48	14	11
chr10_75715942_75717368	14	22	4	6
chr10_75723391_75731595	165	159	104	120
chr10_75756957_75759161	31	36	7	14
chr10_75837895_75841328	46	62	32	37
chr10_76015495_76018608	29	30	28	29
chr10_76177414_76182331	60	64	60	42
chr10_76489946_76491483	18	37	9	16
chr10_76621784_76623840	24	23	17	18
chr10_76727392_76729118	23	17	11	18
chr10_76864594_76867352	33	36	21	15
chr10_76969555_76971556	24	39	12	14
chr10_76981971_76987510	63	117	51	57
chr10_77908695_77910807	21	26	27	16
chr10_78536693_78541507	87	78	50	76
chr10_79269879_79271873	14	27	13	7
chr10_79323170_79325659	34	43	25	21
chr10_79558663_79563264	31	51	45	28
chr10_79606151_79607269	13	16	9	13
chr10_79609306_79611523	26	15	22	19
chr10_79613481_79615189	10	17	17	8
chr10_79632967_79636091	35	37	26	15
chr10_79637826_79639977	26	30	9	20
chr10_79645357_79649680	58	64	32	34
chr10_79708636_79709924	10	19	10	16
chr10_79793242_79794528	16	21	9	16
chr10_80115758_80118298	28	34	19	22
chr10_80180156_80181918	19	22	11	14
chr10_80310897_80312525	19	20	12	7
chr10_80724372_80725540	13	18	7	4
chr10_80894890_80898052	24	44	15	8
chr10_80906603_80912094	32	58	55	21
chr10_80915412_80920777	58	81	49	35
chr10_81863837_81867371	49	45	25	35
chr10_82223462_82225801	16	44	27	23
chr10_83010085_83013120	54	48	27	35
chr10_83665694_83667069	15	17	14	14
chr10_84292354_84293928	14	11	9	17
chr10_84295581_84297569	18	18	10	21
chr10_84412914_84414526	13	9	7	15
chr10_84515173_84520217	74	65	40	43
chr10_84648199_84649770	21	28	8	20
chr10_84719023_84722533	37	33	19	28
chr10_84836898_84841024	55	56	32	33
chr10_84970906_84972167	15	12	8	12
chr10_85575588_85578002	25	23	9	8
chr10_86325723_86329418	39	29	26	36
chr10_88517114_88518727	15	26	7	18
chr10_88545098_88546408	15	18	17	5
chr10_88555044_88556058	12	12	6	11
chr10_88557645_88564828	81	95	54	44
chr10_88610911_88618681	108	121	70	77
chr10_88621645_88632320	119	159	107	96
chr10_88713336_88716443	37	32	30	30
chr10_89308657_89310079	13	8	17	18
chr10_89365128_89369253	35	49	25	31
chr10_89383480_89388945	89	76	60	72
chr10_89410699_89412960	30	29	13	22
chr10_89576648_89578395	20	22	17	14
chr10_89697021_89699610	29	20	21	30
chr10_89728917_89738133	170	160	106	111
chr10_91001321_91002591	15	20	9	8
chr10_91085219_91088899	50	49	36	44
chr10_91091986_91094254	28	37	16	26
chr10_91102606_91111430	87	115	70	65
chr10_91248721_91252482	43	36	21	31
chr10_91321519_91323494	24	33	20	13
chr10_91402381_91405582	38	37	8	24
chr10_91539164_91540904	11	23	18	4
chr10_91846262_91849223	30	37	26	35
chr10_92060724_92064521	40	41	15	36
chr10_92077795_92081076	62	46	30	41
chr10_92122583_92124603	31	33	18	26
chr10_92153109_92155263	28	24	15	16
chr10_92172028_92173191	15	16	11	5
chr10_92394537_92402289	121	90	75	87
chr10_92482123_92484935	34	24	22	22
chr10_92561508_92566445	62	49	43	35
chr10_92570910_92576823	67	81	58	56
chr10_92579507_92580572	10	9	18	13
chr10_93168792_93170240	15	19	10	21
chr10_93537827_93540818	29	37	17	21
chr10_93557238_93558768	25	21	7	17
chr10_93622495_93626806	48	60	19	42
chr10_93639715_93649871	134	161	70	72
chr10_93682698_93684236	9	29	9	13
chr10_94062909_94067023	54	47	37	37
chr10_94087818_94089079	9	18	9	16
chr10_94350354_94353854	34	34	22	18
chr10_94652224_94657389	70	67	34	45
chr10_94675520_94678239	23	27	21	33
chr10_94752982_94754952	25	23	18	8
chr10_94846482_94848618	25	19	11	21
chr10_94958541_94959970	20	14	8	15
chr10_95029091_95035258	65	75	54	70
chr10_95038606_95043637	75	108	40	54
chr10_95047095_95048289	16	21	9	9
chr10_95112331_95113489	14	9	7	16
chr10_95194486_95199480	71	82	45	45
chr10_95549319_95551765	51	34	15	19
chr10_96381483_96384508	52	26	25	21
chr10_96942596_96943923	14	15	7	17
chr10_96953399_96956166	25	29	15	23
chr10_96971501_96973016	14	17	7	12
chr10_96977629_96982834	55	69	52	65
chr10_96985662_96992871	143	145	80	113
chr10_96994283_96996080	24	14	12	18
chr10_97000931_97004099	33	41	30	26
chr10_97168250_97170665	48	39	38	45
chr10_97233844_97237989	60	77	38	50
chr10_97281161_97282837	19	13	15	11
chr10_97291424_97293064	7	15	17	15
chr10_97310666_97312911	36	30	15	20
chr10_97434894_97436291	16	22	16	7
chr10_97802734_97804422	16	22	8	8
chr10_97883609_97884963	14	20	19	16
chr10_97889098_97890987	23	24	20	19
chr10_98069175_98071660	32	19	23	28
chr10_98209573_98212964	40	46	25	29
chr10_98604098_98605509	23	19	12	15
chr10_99027094_99028773	14	24	10	12
chr10_99095953_99098799	23	31	12	32
chr10_99186807_99188804	21	32	23	16
chr10_99238328_99241050	30	48	19	10
chr10_100406141_100409704	43	46	20	47
chr10_101608527_101611597	41	41	28	39
chr10_101669468_101680158	125	185	80	98
chr10_101688515_101689612	2	10	13	10
chr10_102129847_102135100	74	67	44	46
chr10_103245654_103251000	53	60	40	50
chr10_103287235_103290354	25	38	31	27
chr10_103341122_103342194	14	8	14	7
chr10_103402046_103406451	77	63	39	52
chr10_103410387_103412187	27	20	19	22
chr10_103453681_103455336	24	33	13	10
chr10_103577287_103578891	14	30	15	17
chr10_103662117_103664362	23	37	17	13
chr10_103768623_103769924	16	17	5	9
chr10_103876374_103878271	26	21	18	13
chr10_103880047_103882951	39	39	26	25
chr10_103910859_103913419	21	52	20	20
chr10_104214658_104218823	36	41	21	12
chr10_104385872_104390666	80	103	49	45
chr10_104562057_104563739	22	24	18	18
chr10_104911673_104916636	55	82	37	53
chr10_104963725_104966116	34	26	15	41
chr10_104975426_104976752	17	23	12	6
chr10_104989887_104993255	49	72	31	35
chr10_105666776_105670911	55	46	30	38
chr10_105817148_105820213	38	46	16	28
chr10_105825358_105829192	49	43	41	43
chr10_105835946_105838269	31	28	19	22
chr10_105879583_105882744	33	41	22	21
chr10_106078729_106079805	12	14	8	2
chr10_106086303_106092337	79	92	31	58
chr10_106097446_106099320	17	27	7	16
chr10_107416379_107418323	18	17	4	14
chr10_107434164_107436571	36	20	15	25
chr10_107603222_107604910	18	20	10	17
chr10_108672666_108674353	23	22	11	15
chr10_109671723_109675841	48	40	28	29
chr10_109910232_109912610	32	27	18	12
chr10_111652470_111653979	15	20	11	7
chr10_111691458_111697602	69	93	44	56
chr10_111713584_111715328	7	17	18	6
chr10_111720226_111722678	26	28	26	14
chr10_111760945_111764506	49	43	39	52
chr10_111766879_111770200	36	32	19	14
chr10_111772947_111774242	20	16	22	9
chr10_111836245_111838254	14	26	12	5
chr10_112063707_112065535	23	32	13	22
chr10_112246687_112249586	35	23	16	17
chr10_112312999_112314971	35	33	21	23
chr10_112326439_112328400	32	47	12	18
chr10_112895840_112898636	39	15	9	33
chr10_113265077_113267959	44	39	15	23
chr10_113596793_113597985	15	12	12	15
chr10_114342590_114344021	15	30	16	8
chr10_114347096_114348816	23	24	18	18
chr10_114397447_114400218	36	18	28	29
chr10_114428973_114434660	47	71	47	41
chr10_114437060_114442469	85	99	68	72
chr10_114467375_114470791	47	47	22	28
chr10_114488522_114490188	15	21	7	16
chr10_114491467_114495524	50	47	33	35
chr10_114556333_114558272	19	32	14	11
chr10_114571597_114574328	19	38	16	28
chr10_114589310_114595394	69	72	39	43
chr10_114657724_114659727	24	23	26	17
chr10_114687810_114688885	9	16	3	11
chr10_114705227_114723246	241	312	166	212
chr10_114743184_114747032	27	47	35	31
chr10_114812690_114817110	41	58	29	32
chr10_114818726_114820922	20	29	14	15
chr10_114843278_114844325	13	5	6	9
chr10_114846363_114847731	11	21	8	10
chr10_114864189_114865910	16	17	15	14
chr10_114892025_114896713	46	64	27	41
chr10_115613317_115614967	19	31	10	15
chr10_116231960_116233328	6	18	9	15
chr10_116247811_116250386	32	27	16	20
chr10_116274668_116276980	28	28	14	15
chr10_116676721_116678611	22	24	14	11
chr10_116697650_116699314	17	19	16	7
chr10_116729023_116730765	15	24	15	13
chr10_117706866_117710274	27	40	27	16
chr10_118083617_118087240	46	32	15	44
chr10_118598172_118599553	15	18	8	16
chr10_118631778_118634748	48	38	30	33
chr10_118706398_118708433	22	26	17	26
chr10_118736507_118739645	38	44	18	19
chr10_119103670_119108958	65	77	43	53
chr10_120491292_120492493	12	14	7	6
chr10_120839549_120840692	18	16	6	14
chr10_121428024_121429527	14	22	5	6
chr10_121446582_121448240	15	34	19	17
chr10_121496635_121498170	12	19	18	9
chr10_121541528_121543417	23	17	22	15
chr10_121544695_121547330	52	49	23	34
chr10_121631531_121633121	11	22	5	14
chr10_122559156_122562967	51	42	35	51
chr10_123046999_123050018	47	58	28	34
chr10_123070858_123072361	18	19	7	13
chr10_123097327_123101833	60	73	34	56
chr10_123218132_123220661	29	38	17	8
chr10_123299101_123304013	71	96	35	65
chr10_123312907_123314376	15	23	9	16
chr10_123337478_123342119	54	68	38	27
chr10_123649740_123652849	34	52	23	30
chr10_123686876_123688149	16	20	8	17
chr10_123718516_123720403	20	26	18	15
chr10_123936051_123943250	71	106	52	48
chr10_124058308_124059496	14	23	9	11
chr10_124604690_124607163	26	40	19	16
chr10_124609457_124612529	24	36	17	11
chr10_124633862_124638091	84	72	43	56
chr10_125218912_125220655	21	22	13	16
chr10_125778913_125782089	42	41	21	25
chr10_126050721_126052388	17	25	14	19
chr10_126158112_126159716	17	22	10	15
chr10_126338449_126340704	25	33	18	17
chr10_126836405_126847719	118	157	70	94
chr10_126848146_126851382	27	46	13	35
chr10_127170551_127171804	15	11	7	13
chr10_127802761_127804017	18	9	5	16
chr10_127840116_127844766	91	82	55	73
chr10_129999173_130001027	19	19	11	20
chr10_131330009_131331640	14	25	9	5
chr10_134213700_134214720	12	15	8	6
chr10_134220191_134226614	65	109	47	49
chr10_134258341_134261445	22	33	11	29
chr10_134704631_134705711	14	10	7	14
chr10_134964337_134965978	18	31	15	17
chr11_304686_306719	26	33	8	17
chr11_312845_314189	21	15	13	8
chr11_340411_342275	16	22	23	18
chr11_355315_356409	14	17	9	8
chr11_742943_748167	43	85	44	51
chr11_808940_810744	22	29	9	21
chr11_942432_946316	52	59	28	32
chr11_2713594_2715793	27	32	15	21
chr11_3012540_3014258	17	29	20	9
chr11_3174087_3176058	19	30	14	14
chr11_3729573_3734436	46	55	40	40
chr11_3846862_3848785	26	32	19	11
chr11_4724956_4726507	20	23	14	16
chr11_5708963_5711648	33	23	10	11
chr11_6320194_6327923	94	126	73	84
chr11_6339637_6349750	120	177	76	86
chr11_6627655_6629692	19	37	12	13
chr11_6864513_6865525	10	16	8	13
chr11_7614727_7619318	56	79	45	52
chr11_7926870_7932616	69	88	48	65
chr11_7990638_7997885	52	95	36	48
chr11_8691966_8694273	38	41	24	31
chr11_8703439_8705378	23	43	25	16
chr11_8719431_8722552	37	40	27	32
chr11_8729614_8731231	10	12	19	18
chr11_8766162_8767817	11	23	15	8
chr11_8847154_8849243	20	32	18	19
chr11_8853943_8857613	41	39	16	16
chr11_8860773_8862806	32	32	20	21
chr11_9067961_9068974	12	18	5	10
chr11_9383833_9386760	45	55	24	22
chr11_9480957_9483996	48	46	22	31
chr11_9527114_9531537	42	53	26	58
chr11_9550742_9553489	28	38	23	16
chr11_9555452_9557055	21	18	15	16
chr11_9586613_9591554	65	79	51	49
chr11_9628962_9631092	21	21	24	8
chr11_9647361_9650580	45	47	37	39
chr11_9696795_9698634	14	18	9	18
chr11_9732334_9734058	15	23	14	11
chr11_9822458_9826463	61	82	34	48
chr11_9842023_9843532	13	20	11	11
chr11_9859916_9861573	14	22	15	16
chr11_9878983_9881531	22	24	19	25
chr11_9883630_9886120	25	33	24	30
chr11_9923353_9930288	128	134	91	120
chr11_9942167_9946576	57	63	44	58
chr11_10003177_10005507	25	42	15	25
chr11_10045797_10046815	5	15	4	12
chr11_10087427_10090561	39	46	21	30
chr11_10130590_10132476	21	22	16	15
chr11_10270254_10274977	62	66	50	44
chr11_10278544_10283632	32	56	38	30
chr11_10314965_10316303	16	19	6	9
chr11_10337981_10340920	41	23	19	19
chr11_10344205_10346411	21	27	12	10
chr11_10370102_10376443	102	132	57	80
chr11_10533145_10534502	13	2	5	11
chr11_10787214_10788822	17	17	15	13
chr11_11535502_11536525	15	18	5	5
chr11_11712617_11713954	15	17	5	17
chr11_11862800_11864405	16	21	9	14
chr11_12261521_12264592	33	33	19	18
chr11_12577256_12579725	34	41	16	20
chr11_12695247_12697506	19	43	10	7
chr11_12743456_12747374	41	55	28	38
chr11_12845310_12853720	92	97	68	92
chr11_12880980_12888803	163	152	83	109
chr11_12923488_12924516	15	15	2	9
chr11_13280088_13281799	19	26	6	7
chr11_13455733_13457644	28	32	9	11
chr11_14329950_14335231	37	74	41	41
chr11_14350802_14352669	23	26	15	22
chr11_14357287_14370332	208	244	129	149
chr11_14434652_14435707	13	7	5	13
chr11_15569063_15578556	133	94	70	105
chr11_15579727_15581317	19	25	19	14
chr11_16200271_16204096	48	28	28	38
chr11_16490391_16493189	40	34	13	31
chr11_16690676_16692155	20	22	5	7
chr11_16833275_16834691	14	23	7	8
chr11_18994853_18996322	9	15	10	19
chr11_19094743_19096138	11	20	15	15
chr11_19695434_19696463	9	14	3	10
chr11_19792249_19795631	35	49	24	29
chr11_19798753_19802751	45	45	29	25
chr11_19813849_19815754	18	20	13	20
chr11_19823074_19824790	19	24	9	9
chr11_19834831_19844037	134	150	79	127
chr11_19844245_19846618	14	32	24	23
chr11_19847128_19854202	87	71	53	44
chr11_19893863_19896611	26	45	18	22
chr11_19923150_19927384	32	48	33	16
chr11_19973722_19975689	23	31	15	18
chr11_20042411_20047544	67	65	39	39
chr11_20058443_20060060	17	10	21	9
chr11_20070764_20075325	43	59	31	30
chr11_20084776_20089284	59	58	51	38
chr11_20518223_20520124	30	23	12	17
chr11_21087203_21088874	19	19	14	15
chr11_22724152_22725600	15	23	20	9
chr11_23165743_23168856	55	41	33	27
chr11_23665106_23667173	30	25	26	34
chr11_23980183_23981745	23	20	20	15
chr11_24468357_24471260	43	31	26	26
chr11_24700184_24702713	29	36	33	20
chr11_25598184_25604042	88	55	47	70
chr11_26179854_26181122	4	19	10	12
chr11_27264315_27265677	18	8	6	13
chr11_27367843_27372521	89	77	41	53
chr11_27374172_27377002	26	31	19	29
chr11_27408710_27410775	25	28	15	14
chr11_27461514_27467612	79	87	44	62
chr11_27527480_27529285	28	31	12	15
chr11_27592196_27593516	14	18	11	9
chr11_27656001_27658850	40	39	12	40
chr11_27708941_27710384	19	26	10	11
chr11_27714717_27719744	61	56	36	47
chr11_28814639_28816339	20	21	19	25
chr11_29321644_29322720	14	13	16	11
chr11_29643236_29646592	62	62	38	42
chr11_29979971_29982304	25	23	21	28
chr11_30443258_30445804	32	30	24	24
chr11_30464700_30467345	21	29	14	32
chr11_30483720_30485214	23	22	10	21
chr11_30499466_30505418	69	77	63	74
chr11_30566298_30574939	91	50	57	68
chr11_30580255_30583535	54	68	27	46
chr11_31145070_31146490	15	16	12	7
chr11_31160133_31162409	27	22	15	20
chr11_31257545_31265852	124	91	88	87
chr11_31438321_31444816	81	71	66	49
chr11_31463343_31464546	20	17	10	5
chr11_31505907_31507802	19	36	11	20
chr11_31579370_31580568	16	16	12	11
chr11_31622126_31624114	23	23	10	19
chr11_31633937_31635421	17	17	17	14
chr11_31670672_31673596	44	44	23	26
chr11_31800206_31801866	15	19	21	15
chr11_31869769_31872202	27	20	21	25
chr11_31883736_31886315	23	26	17	21
chr11_31912652_31913726	16	6	7	11
chr11_32911628_32917587	97	118	53	75
chr11_32939134_32941102	15	29	23	7
chr11_33142386_33145829	43	61	36	39
chr11_33154595_33156738	20	29	16	21
chr11_33182249_33183567	19	26	4	7
chr11_33689213_33691094	18	34	16	32
chr11_34066246_34067504	13	21	15	4
chr11_34937756_34939234	14	23	15	9
chr11_35194565_35196065	17	23	6	5
chr11_36022882_36023965	14	9	14	9
chr11_36094328_36095700	16	21	7	7
chr11_36111480_36114905	32	43	41	29
chr11_36125900_36128695	41	45	25	33
chr11_36130171_36134371	79	93	43	71
chr11_36347761_36350189	34	35	21	21
chr11_36476629_36477722	16	16	5	5
chr11_38276440_38278066	15	18	11	17
chr11_40667066_40668179	17	8	13	10
chr11_40699945_40701539	25	21	10	13
chr11_41134673_41141807	108	95	66	93
chr11_41226568_41228456	15	24	14	25
chr11_41398936_41405596	48	58	57	68
chr11_41411491_41420540	130	159	103	133
chr11_41448777_41450346	19	14	14	18
chr11_41474679_41478873	57	42	39	46
chr11_41517259_41522041	56	56	39	73
chr11_42861759_42864008	26	25	15	13
chr11_43091934_43095171	34	24	14	34
chr11_43975021_43977564	23	36	19	11
chr11_44199137_44201435	17	31	7	20
chr11_44219930_44223049	44	55	43	39
chr11_44263088_44266998	57	63	31	36
chr11_44691191_44694350	44	52	25	41
chr11_44806090_44808047	20	21	16	13
chr11_44845049_44846965	17	23	5	17
chr11_44882792_44885434	36	53	33	23
chr11_44982899_44986300	29	50	25	18
chr11_44999346_45001345	20	22	6	17
chr11_45112654_45114933	18	41	16	25
chr11_45390657_45392097	13	15	9	4
chr11_45942952_45944600	5	27	1	19
chr11_46003915_46006253	25	48	22	21
chr11_46009678_46013371	25	46	21	33
chr11_46014634_46028770	224	254	162	184
chr11_46030910_46035707	59	69	57	45
chr11_46071190_46080047	95	149	87	81
[truncated: 11,753 more rows]
