# Supplementary material for: Controlling gene activation by enhancers through a drug-inducible topological insulator
Source: eLife. 2020 May 5;9:e47980. doi: 10.7554/eLife.47980 (PMC7200164; doi:10.7554/eLife.47980)
Supplement: Figure 5—source data 1. [file elife-47980-fig5-data1.xlsx]

## Sheet: 4C-seq
Figure 5G, Figure 5-figure supplement 1M - 4C-seq read counts in the intervals
	chr8	chr8	chr8	chr8
start	127825136	128775680	129187540	127825136
end	128718559	129187539	130742614	130742614
sample	left	30kb-440kb	440kb-right	3Mb(-VP10kb)
VP-MYC1_DOX_1	120571	55513	65493	270358
VP-MYC2_DOX_1	101349	52120	57930	232649
VP-MYC2_DOX_2	53486	25222	30071	118896
VP-MYC1_noDOX_1	71747	145941	106955	343798
VP-MYC2_noDOX_1	38298	69958	53353	171541
VP-MYC2_noDOX_2	17715	31047	27952	79834
Figure 5-figure supplement 1F - CTCF nChIP-seq read counts in the peaks
	DOX_1	DOX_2	noDOX_1	noDOX_2
chr1_567196_567961	410	351	589	589
chr1_569547_570312	285	237	445	445
chr1_713710_714475	22	23	36	36
chr1_804898_805663	37	45	25	25
chr1_839769_840534	61	82	76	76
chr1_919332_920097	136	143	136	136
chr1_936979_937744	72	78	74	74
chr1_968087_968852	30	48	15	15
chr1_1225330_1226095	49	34	29	29
chr1_1237133_1237898	21	20	14	14
chr1_1279770_1280535	29	26	18	18
chr1_1284403_1285168	25	24	14	14
chr1_1307216_1307981	121	127	106	106
chr1_1376045_1376810	19	25	16	16
chr1_1440095_1440860	83	106	62	62
chr1_1579989_1580754	165	151	106	106
chr1_1596909_1597674	26	34	16	16
chr1_1875226_1875991	41	55	49	49
chr1_1976039_1976804	72	109	113	113
chr1_2022889_2023654	33	46	35	35
chr1_2246339_2247104	77	75	80	80
chr1_2313830_2314595	35	82	34	34
chr1_2345615_2346380	27	26	13	13
chr1_2470585_2471350	23	43	18	18
chr1_2479266_2480031	36	50	22	22
chr1_2493163_2493928	43	87	31	31
chr1_2631901_2632520	37	50	33	33
chr1_2688479_2689440	77	84	84	84
chr1_2702980_2703745	87	89	98	98
chr1_2838492_2839111	29	23	16	16
chr1_2928811_2929576	106	85	63	63
chr1_2940253_2941084	9	14	15	15
chr1_3236301_3237066	101	168	124	124
chr1_3333479_3334244	35	51	51	51
chr1_3369477_3370242	95	123	96	96
chr1_3400203_3400968	34	52	45	45
chr1_3407586_3408351	319	237	228	228
chr1_3434520_3435285	129	114	96	96
chr1_3481598_3482363	90	124	80	80
chr1_3531594_3532216	17	33	14	14
chr1_3535381_3536146	96	157	69	69
chr1_3640769_3641534	260	294	269	269
chr1_3717824_3718589	25	42	17	17
chr1_4645055_4645820	249	199	161	161
chr1_4712427_4713192	261	286	226	226
chr1_5569733_5570498	157	245	197	197
chr1_5574416_5575181	329	301	268	268
chr1_5805644_5806409	158	209	182	182
chr1_5953535_5954300	32	52	22	22
chr1_6094324_6095089	112	140	101	101
chr1_6265030_6265795	112	133	96	96
chr1_6306588_6307353	199	228	189	189
chr1_6403307_6404072	111	161	126	126
chr1_6422908_6423673	25	45	20	20
chr1_6464598_6465217	11	17	9	9
chr1_6474160_6474925	30	67	26	26
chr1_6483281_6484046	30	28	21	21
chr1_6497879_6498644	333	360	226	226
chr1_6535354_6536119	254	248	248	248
chr1_6549745_6550510	132	171	153	153
chr1_6614267_6615032	161	160	147	147
chr1_6644003_6644768	12	15	14	14
chr1_6706375_6707140	33	54	42	42
chr1_6761583_6762348	55	55	30	30
chr1_6779871_6780636	7	18	13	13
chr1_6787331_6788096	139	218	166	166
chr1_7047819_7048584	7	27	15	15
chr1_7102644_7103266	17	16	12	12
chr1_7130258_7131023	9	22	13	13
chr1_7278130_7278895	154	121	112	112
chr1_7599586_7600351	49	56	34	34
chr1_7707102_7707867	148	158	128	128
chr1_7727392_7728157	139	175	159	159
chr1_7812749_7813368	9	23	10	10
chr1_7868107_7868872	39	73	43	43
chr1_7962675_7963294	11	48	11	11
chr1_8035134_8035899	42	101	31	31
chr1_8042159_8042924	90	138	87	87
chr1_8408838_8409603	176	210	163	163
chr1_8411525_8412290	116	110	82	82
chr1_8620925_8621690	23	33	13	13
chr1_8786445_8787064	10	18	9	9
chr1_8908718_8909483	266	240	187	187
chr1_8922309_8923074	28	48	18	18
chr1_9022817_9023443	14	16	8	8
chr1_9047889_9048654	161	191	162	162
chr1_9064971_9065736	127	171	107	107
chr1_9170622_9171387	175	187	151	151
chr1_9202076_9202841	120	153	113	113
chr1_9241135_9241900	170	184	157	157
chr1_9309919_9310684	23	42	14	14
chr1_9326933_9327698	103	94	73	73
chr1_9348860_9349625	275	312	220	220
chr1_9550985_9551610	51	60	49	49
chr1_9555088_9555853	230	206	268	268
chr1_9648324_9649089	39	53	27	27
chr1_9686835_9687600	82	62	53	53
chr1_9762179_9762798	16	36	17	17
chr1_9781619_9782384	247	238	232	232
chr1_9784899_9785664	106	126	89	89
chr1_9844487_9845106	13	8	9	9
chr1_9887717_9888482	45	59	58	58
chr1_9927318_9928083	332	400	279	279
chr1_9934731_9935496	415	380	354	354
chr1_10212786_10213551	38	78	36	36
chr1_10270061_10270826	79	113	76	76
chr1_10437257_10438022	59	86	45	45
chr1_10487913_10488678	38	76	48	48
chr1_10490073_10490838	60	66	51	51
chr1_10554519_10555284	190	194	149	149
chr1_10926954_10927719	159	141	140	140
chr1_11001802_11002567	373	267	291	291
chr1_11020846_11021611	177	227	199	199
chr1_11097463_11098228	95	152	103	103
chr1_11301562_11302327	23	52	21	21
chr1_11397352_11398117	136	153	120	120
chr1_11424073_11424838	27	25	22	22
chr1_11538505_11539270	115	107	96	96
chr1_11702249_11703014	63	115	56	56
chr1_11705604_11706223	12	35	18	18
chr1_11770946_11771711	29	61	33	33
chr1_11779670_11780435	88	81	88	88
chr1_11845010_11845775	64	69	52	52
chr1_11898498_11899263	36	65	28	28
chr1_11925373_11926138	38	70	38	38
chr1_11953786_11954551	82	129	79	79
chr1_12178474_12179239	181	175	147	147
chr1_12184646_12185411	254	237	227	227
chr1_12268717_12269482	147	208	157	157
chr1_12289630_12290395	93	106	78	78
chr1_12661136_12661763	4	26	4	4
chr1_12679631_12680396	132	121	84	84
chr1_12718803_12719568	265	242	219	219
chr1_12820150_12820915	45	64	31	31
chr1_12843724_12844489	217	225	176	176
chr1_13897238_13898003	49	97	85	85
chr1_13991951_13992716	84	101	104	104
chr1_14041192_14041957	14	16	10	10
chr1_14139904_14140669	94	100	96	96
chr1_14155145_14155910	102	103	64	64
chr1_14256532_14257151	11	24	5	5
chr1_14276949_14277714	64	106	54	54
chr1_14286676_14287441	238	260	189	189
chr1_14721982_14722601	12	28	7	7
chr1_14898194_14898959	91	86	62	62
chr1_15058199_15058964	149	148	127	127
chr1_15095758_15096523	28	28	30	30
chr1_15105450_15106215	107	107	74	74
chr1_15241668_15242433	402	368	318	318
chr1_15353789_15354554	141	206	120	120
chr1_15388787_15389552	238	203	167	167
chr1_15426696_15427342	6	27	9	9
chr1_15454817_15455582	230	284	193	193
chr1_15598908_15599538	7	11	8	8
chr1_15631008_15631773	204	238	184	184
chr1_15649833_15650598	319	326	295	295
chr1_15757441_15758206	246	267	212	212
chr1_16118306_16119071	65	126	101	101
chr1_16202812_16203469	2	15	8	8
chr1_16283757_16284522	41	60	29	29
chr1_16320934_16321566	28	27	15	15
chr1_16335322_16336087	394	383	312	312
chr1_16359120_16359885	83	118	75	75
chr1_16382151_16383264	46	57	42	42
chr1_16405162_16405927	33	39	18	18
chr1_16408641_16409406	87	118	50	50
chr1_16514031_16514796	70	115	54	54
chr1_16570692_16571457	31	43	22	22
chr1_16689665_16690430	16	24	24	24
chr1_16766730_16767495	20	43	22	22
chr1_16918049_16918814	177	261	175	175
chr1_16947333_16948098	76	154	69	69
chr1_16951294_16951913	16	35	19	19
chr1_17029508_17030129	14	25	7	7
chr1_17036067_17036832	314	299	252	252
chr1_17277954_17278719	151	186	134	134
chr1_17289796_17290561	52	77	39	39
chr1_17452062_17452827	26	31	18	18
chr1_17563325_17564090	183	146	158	158
chr1_17600474_17601239	99	131	99	99
chr1_17662167_17663253	15	24	23	23
chr1_17732458_17733223	28	49	35	35
chr1_17746133_17746898	250	254	215	215
chr1_17765891_17766656	65	118	47	47
chr1_17803637_17804402	10	26	13	13
chr1_17820539_17821304	81	139	77	77
chr1_17828615_17829380	211	282	193	193
chr1_17933129_17933894	239	224	176	176
chr1_17987863_17988628	315	298	280	280
chr1_18081376_18082141	49	46	44	44
chr1_18152388_18153153	103	132	88	88
chr1_18310811_18311576	277	289	216	216
chr1_18426789_18427554	214	271	192	192
chr1_18558378_18559181	142	63	107	107
chr1_18561059_18561824	260	330	262	262
chr1_18626014_18626779	174	167	135	135
chr1_18629118_18629883	98	83	85	85
chr1_18648826_18649445	44	67	39	39
chr1_18650566_18651331	209	219	181	181
chr1_18700177_18700942	82	135	79	79
chr1_18901877_18902642	39	83	52	52
chr1_18907721_18908486	52	68	30	30
chr1_19007669_19008434	20	35	15	15
chr1_19147045_19147810	141	150	104	104
chr1_19201496_19202261	279	224	205	205
chr1_19210436_19211201	71	81	83	83
chr1_19233309_19234144	107	99	85	85
chr1_19239301_19240066	36	58	42	42
chr1_19567553_19568318	139	165	88	88
chr1_19667736_19668501	340	302	273	273
chr1_19700628_19701393	42	48	33	33
chr1_19908549_19909314	37	62	26	26
chr1_19979998_19980763	251	305	275	275
chr1_19986173_19986792	15	33	14	14
chr1_19988035_19988800	75	63	66	66
chr1_20030824_20031589	193	241	186	186
chr1_20041873_20042638	136	220	136	136
chr1_20088467_20089232	28	44	14	14
chr1_20137600_20138219	13	17	11	11
chr1_20208372_20209137	32	69	45	45
chr1_20427270_20427889	15	19	12	12
chr1_20478614_20479379	107	139	104	104
chr1_20539112_20539877	83	86	72	72
chr1_20688105_20688870	206	269	174	174
chr1_20703186_20703951	256	297	211	211
chr1_20756732_20757497	101	176	98	98
chr1_20820074_20820839	214	252	212	212
chr1_20848614_20849379	75	112	77	77
chr1_20878217_20878982	12	7	15	15
chr1_20901550_20902315	22	26	19	19
chr1_20959493_20960258	253	194	220	220
chr1_20966413_20967178	79	133	60	60
chr1_21022716_21023481	88	106	83	83
chr1_21543139_21543904	164	197	155	155
chr1_21558259_21559024	214	242	180	180
chr1_21571306_21572071	85	95	72	72
chr1_21596487_21597252	256	242	225	225
chr1_21661007_21661772	65	92	55	55
chr1_21794985_21795610	7	15	6	6
chr1_21921820_21922585	66	82	65	65
chr1_21985394_21986159	175	184	184	184
chr1_22140722_22141487	109	97	87	87
chr1_22290269_22291034	198	288	181	181
chr1_22349187_22349833	9	13	6	6
chr1_22431933_22432698	102	127	91	91
chr1_22458199_22458964	61	83	59	59
chr1_22602132_22602897	21	48	18	18
chr1_22643584_22644349	71	97	67	67
chr1_22742867_22743632	33	47	35	35
chr1_22980889_22981654	10	19	19	19
chr1_23030754_23031519	162	204	128	128
chr1_23188384_23189149	181	182	144	144
chr1_23215522_23216287	16	23	13	13
chr1_23256601_23257366	21	44	21	21
chr1_23290507_23291272	245	241	229	229
chr1_23424995_23425760	68	106	102	102
chr1_23510960_23511725	167	172	144	144
chr1_23542893_23543760	39	41	41	41
chr1_23730215_23730980	222	362	217	217
chr1_23823320_23824085	312	287	239	239
chr1_23866073_23866838	86	124	76	76
chr1_23871005_23871770	50	76	38	38
chr1_23961237_23962002	228	248	197	197
chr1_23963774_23964412	39	89	26	26
chr1_23983964_23984729	100	176	128	128
chr1_24044779_24045544	18	35	28	28
chr1_24071844_24072609	15	13	14	14
chr1_24098393_24099158	47	96	67	67
chr1_24137083_24137848	73	130	62	62
chr1_24194527_24195292	157	161	115	115
chr1_24242684_24243589	45	19	34	34
chr1_24397114_24397879	130	175	133	133
chr1_24476767_24477532	188	168	187	187
chr1_24525565_24526330	198	220	204	204
chr1_24528147_24528912	97	148	91	91
chr1_24711481_24712246	24	31	28	28
chr1_24716432_24717058	10	24	10	10
chr1_24718710_24719332	6	15	8	8
chr1_24741642_24742407	91	131	67	67
chr1_24868260_24869025	217	159	171	171
chr1_24913497_24914262	18	34	15	15
chr1_25174152_25174923	27	60	19	19
chr1_25224384_25225149	14	34	20	20
chr1_25363437_25364202	50	63	53	53
chr1_25427711_25428476	249	313	218	218
chr1_25443758_25444523	17	27	16	16
chr1_25531164_25531929	144	153	129	129
chr1_25813833_25814598	33	40	32	32
chr1_25846781_25847546	102	125	113	113
chr1_25899060_25899825	174	211	147	147
chr1_25934956_25935575	13	23	10	10
chr1_25945332_25946097	133	234	150	150
chr1_26018969_26019588	19	26	9	9
chr1_26137120_26137885	163	167	137	137
chr1_26221673_26222438	172	186	160	160
chr1_26324420_26325185	68	67	65	65
chr1_26362253_26363018	200	161	195	195
chr1_26431229_26431994	352	330	284	284
chr1_26471401_26472166	11	32	12	12
chr1_26495945_26496710	81	82	71	71
chr1_26601796_26602561	112	155	82	82
chr1_26611354_26612119	39	49	37	37
chr1_26647832_26648597	78	106	68	68
chr1_26690109_26690874	42	65	53	53
chr1_26722551_26723316	196	218	141	141
chr1_26743297_26744062	36	59	30	30
chr1_26796678_26797304	6	17	4	4
chr1_26826433_26827198	31	44	32	32
chr1_26864993_26865758	37	68	38	38
chr1_26923841_26924606	15	41	27	27
chr1_26928738_26929357	5	24	4	4
chr1_27115447_27116212	70	123	105	105
chr1_27136393_27137036	10	30	12	12
chr1_27179398_27180163	11	25	10	10
chr1_27189020_27189785	24	51	27	27
chr1_27204251_27205016	25	68	42	42
chr1_27323900_27324665	78	90	75	75
chr1_27370799_27371564	294	289	265	265
chr1_27372266_27372886	25	55	47	47
chr1_27423673_27424438	253	299	197	197
chr1_27428988_27429753	280	277	225	225
chr1_27481306_27482071	12	8	14	14
chr1_27524228_27524993	203	269	176	176
chr1_27610973_27611738	57	142	73	73
chr1_27622992_27623757	187	182	145	145
chr1_27627079_27627844	335	314	271	271
chr1_27659070_27659835	208	218	162	162
chr1_27683789_27684554	523	406	364	364
chr1_27714672_27715437	258	320	203	203
chr1_27721695_27722460	92	111	83	83
chr1_27883031_27883796	222	235	197	197
chr1_27934918_27935683	140	122	119	119
chr1_27970172_27970937	32	52	33	33
chr1_27989486_27990251	237	242	234	234
chr1_27995457_27996222	149	159	146	146
chr1_28184360_28185125	191	269	184	184
chr1_28417505_28418270	35	75	43	43
chr1_28574781_28575546	112	163	140	140
chr1_28685967_28686732	22	48	26	26
chr1_28844317_28845082	278	244	214	214
chr1_29111387_29112152	421	356	327	327
chr1_29203489_29204254	261	259	205	205
chr1_29529180_29529945	248	259	212	212
chr1_29562595_29563520	71	79	72	72
chr1_29658535_29659300	60	81	76	76
chr1_29667233_29667998	67	88	54	54
chr1_29705798_29706563	41	68	33	33
chr1_29779817_29780582	29	53	25	25
chr1_30129135_30129900	24	29	14	14
chr1_30170607_30171372	13	27	11	11
chr1_30176187_30176952	15	51	22	22
chr1_30265652_30266417	17	46	19	19
chr1_30558614_30559379	108	106	101	101
chr1_30704948_30705713	55	78	46	46
chr1_30853024_30853789	80	153	82	82
chr1_31187878_31188643	87	108	57	57
chr1_31191836_31192601	246	198	207	207
chr1_31252232_31252997	371	398	337	337
chr1_31254961_31255726	247	217	238	238
chr1_31274386_31275151	177	170	130	130
chr1_31402049_31402814	109	123	121	121
chr1_31635329_31636094	162	179	143	143
chr1_31654075_31654840	56	46	55	55
chr1_31656593_31657358	63	82	61	61
chr1_31867253_31868018	36	45	29	29
chr1_31895368_31896133	224	274	223	223
chr1_32014263_32015028	248	269	271	271
chr1_32029474_32030239	167	190	145	145
chr1_32059401_32060166	35	45	25	25
chr1_32083513_32084278	100	141	89	89
chr1_32098517_32099282	29	62	21	21
chr1_32107765_32108384	4	17	12	12
chr1_32129234_32129999	233	296	188	188
chr1_32149402_32150167	34	72	32	32
chr1_32211033_32211798	25	19	16	16
chr1_32254613_32255378	20	40	31	31
chr1_32281359_32282124	236	256	180	180
chr1_32429517_32430282	158	177	122	122
chr1_32528887_32529506	8	13	7	7
chr1_32713600_32714365	182	175	167	167
chr1_32866238_32867003	43	92	35	35
chr1_32879353_32880118	171	188	141	141
chr1_32913718_32914483	110	129	111	111
chr1_32985832_32986597	122	169	126	126
chr1_33152225_33152844	9	11	9	9
chr1_33177561_33178326	419	291	285	285
chr1_33238395_33239160	62	70	47	47
chr1_33338011_33338776	184	222	165	165
chr1_33342045_33342810	166	139	149	149
chr1_33358272_33359037	156	179	157	157
chr1_33398814_33399579	9	25	16	16
chr1_33520533_33521298	24	56	19	19
chr1_33560402_33561167	277	350	278	278
chr1_33592597_33593362	51	82	46	46
chr1_33760857_33761622	325	375	276	276
chr1_33764132_33764754	77	94	61	61
chr1_33833151_33833916	140	181	124	124
chr1_34078280_34079045	134	207	127	127
chr1_34090340_34091105	142	99	81	81
chr1_34098445_34099210	43	61	60	60
chr1_34100299_34100934	10	35	12	12
chr1_34106463_34107228	4	13	12	12
chr1_34579312_34580077	35	52	36	36
chr1_35012428_35013193	31	47	42	42
chr1_35063364_35063983	12	21	7	7
chr1_35146896_35147661	56	112	61	61
chr1_35208062_35208827	197	182	144	144
chr1_35251845_35252610	23	27	24	24
chr1_35318129_35318894	42	73	38	38
chr1_35331745_35332510	136	161	156	156
chr1_35686377_35687142	17	32	18	18
chr1_36030020_36030785	84	123	63	63
chr1_36034311_36035076	203	202	164	164
chr1_36180877_36181642	31	67	35	35
chr1_36192256_36193021	66	97	63	63
chr1_36240069_36240834	13	25	23	23
chr1_36348318_36349083	77	99	47	47
chr1_36554047_36554685	29	42	17	17
chr1_36641723_36642488	11	22	20	20
chr1_36690217_36690982	15	41	20	20
chr1_36834440_36835205	224	319	197	197
chr1_36886204_36886969	209	272	143	143
chr1_36981733_36982498	117	126	105	105
chr1_37019299_37019919	13	45	11	11
chr1_37041452_37042217	74	75	67	67
chr1_37074661_37075426	195	180	144	144
chr1_37115851_37116616	154	145	131	131
chr1_37169119_37169884	111	134	94	94
chr1_37329596_37330361	91	112	109	109
chr1_37561957_37562722	28	55	22	22
chr1_37789212_37789977	197	262	182	182
chr1_37899680_37900445	67	114	54	54
chr1_37913631_37914257	6	9	9	9
chr1_37920241_37921006	256	284	202	202
chr1_37952758_37953523	229	253	204	204
chr1_37980032_37980797	43	57	41	41
chr1_38147845_38148610	44	64	44	44
chr1_38276510_38277275	138	219	153	153
chr1_38325554_38326319	154	199	157	157
chr1_38384832_38385451	6	19	6	6
chr1_38455476_38456241	56	102	59	59
chr1_38955273_38956038	133	181	143	143
chr1_39052516_39053281	370	325	268	268
chr1_39283551_39284372	22	45	25	25
chr1_39300722_39301487	15	30	15	15
chr1_39724136_39724901	33	45	22	22
chr1_40004745_40005368	15	37	11	11
chr1_40042226_40042991	11	9	17	17
chr1_40071623_40072388	183	178	172	172
chr1_40075142_40075762	32	46	36	36
chr1_40118987_40119752	86	137	78	78
chr1_40123498_40124263	127	183	100	100
chr1_40185511_40186276	98	78	66	66
chr1_40265143_40265908	210	240	169	169
chr1_40282254_40283019	186	186	139	139
chr1_40384966_40385731	23	31	16	16
chr1_40438973_40439738	232	265	199	199
chr1_40544000_40544765	210	228	168	168
chr1_40550174_40550939	103	147	110	110
chr1_40780765_40781530	249	225	219	219
chr1_40804175_40804940	104	179	89	89
chr1_40870316_40871081	46	65	41	41
chr1_41096042_41096702	9	26	9	9
chr1_41134347_41135112	140	159	92	92
chr1_41239659_41240424	17	37	19	19
chr1_41315484_41316249	154	180	136	136
chr1_41414379_41415144	98	131	115	115
chr1_41417978_41418743	163	152	120	120
chr1_41588584_41589349	10	32	16	16
chr1_41733633_41734398	233	278	241	241
chr1_41748147_41748912	28	36	18	18
chr1_41779074_41779839	54	73	72	72
chr1_41882549_41883314	106	145	84	84
chr1_41898174_41898939	138	163	118	118
chr1_41909751_41910516	50	35	38	38
chr1_41957723_41958488	136	158	138	138
chr1_41978869_41979634	62	58	31	31
chr1_41981549_41982314	46	63	29	29
chr1_41995521_41996286	17	16	16	16
chr1_42612322_42613087	78	112	72	72
chr1_42638816_42639581	422	424	345	345
chr1_42642475_42643094	22	42	26	26
chr1_42668747_42669326	5	4	8	8
chr1_42977059_42977824	27	56	26	26
chr1_43222449_43223214	20	31	14	14
chr1_43539090_43539855	79	92	78	78
chr1_43609081_43609846	141	155	119	119
chr1_43620148_43620727	4	1	3	3
chr1_43692750_43693515	235	287	203	203
chr1_43880096_43880861	28	86	36	36
chr1_43994588_43995353	174	164	159	159
chr1_44228930_44229695	15	52	21	21
chr1_44244742_44245507	6	12	14	14
chr1_44400236_44401001	253	299	262	262
chr1_44471142_44471907	132	184	139	139
chr1_44495722_44496552	7	17	20	20
chr1_44513139_44513904	14	48	30	30
chr1_44683188_44683953	88	159	74	74
chr1_44703628_44704393	11	25	14	14
chr1_44783722_44784487	332	296	295	295
chr1_45060600_45061365	219	242	205	205
chr1_45073731_45074350	10	17	6	6
chr1_45118333_45119098	180	278	196	196
chr1_45180458_45181223	243	218	200	200
chr1_45194715_45195480	151	147	98	98
chr1_45196721_45197486	114	164	118	118
chr1_45251559_45252324	279	242	235	235
chr1_45301314_45302079	29	57	25	25
chr1_45479944_45480709	91	131	72	72
chr1_45484163_45484812	24	45	22	22
chr1_45781457_45782222	5	10	17	17
chr1_45787069_45787834	7	24	15	15
chr1_46035536_46036301	226	326	281	281
chr1_46454446_46455211	8	7	15	15
chr1_46502531_46503296	274	280	242	242
chr1_46688958_46689723	172	205	175	175
chr1_46871816_46872581	249	183	169	169
chr1_46877467_46878232	196	159	153	153
chr1_46879126_46879745	4	40	20	20
chr1_46908091_46908856	429	376	393	393
chr1_46942890_46943655	201	227	211	211
chr1_46993484_46994249	24	32	19	19
chr1_47190714_47191479	42	69	30	30
chr1_47343676_47344441	180	249	186	186
chr1_47554819_47555584	163	245	189	189
chr1_47639318_47640083	69	93	74	74
chr1_47640877_47641496	72	105	67	67
chr1_47658377_47659142	182	252	219	219
chr1_47728309_47729074	23	20	12	12
chr1_47889885_47890565	15	18	8	8
chr1_47903247_47904012	185	161	164	164
chr1_47994983_47995748	165	138	122	122
chr1_48175959_48176724	144	133	129	129
chr1_48191734_48192499	27	59	25	25
chr1_48204078_48204843	210	214	131	131
chr1_48220879_48221644	135	176	109	109
chr1_48463059_48463824	108	87	92	92
chr1_48559154_48559919	155	218	189	189
chr1_48667627_48668392	277	313	257	257
chr1_48702400_48703019	5	13	4	4
chr1_48963563_48964328	185	165	150	150
chr1_48996227_48996992	146	172	129	129
chr1_49142796_49143561	29	46	21	21
chr1_49153924_49154549	6	27	12	12
chr1_49162561_49163326	272	299	226	226
chr1_50570930_50571695	33	44	38	38
chr1_50799041_50799806	262	202	173	173
chr1_50814188_50814953	299	322	272	272
chr1_50833924_50834689	156	143	135	135
chr1_51156854_51157619	12	15	11	11
chr1_51169541_51170306	35	43	38	38
chr1_51394923_51395559	15	38	12	12
chr1_51654906_51655671	97	137	121	121
chr1_51657652_51658417	67	57	57	57
chr1_51762252_51763017	193	234	225	225
chr1_52234476_52235241	47	69	46	46
chr1_52362329_52363094	26	49	17	17
chr1_52467761_52468526	232	333	261	261
chr1_53151693_53152458	22	40	22	22
chr1_53647487_53648252	32	68	25	25
chr1_53651188_53651953	105	180	85	85
chr1_53743692_53744457	23	35	26	26
chr1_53858774_53859539	323	367	336	336
chr1_53910106_53910743	11	23	12	12
chr1_53915815_53916434	10	8	4	4
chr1_53935553_53936318	34	62	19	19
chr1_53950925_53951690	19	47	32	32
chr1_54277078_54277843	32	46	21	21
chr1_54326371_54327136	61	106	49	49
chr1_54425227_54425848	13	24	10	10
chr1_54547121_54547886	248	284	223	223
chr1_54954865_54955630	254	260	255	255
chr1_55257371_55258136	108	141	78	78
chr1_55410633_55411252	5	15	8	8
chr1_55416145_55416910	123	159	108	108
chr1_55461856_55462621	120	153	81	81
chr1_55487517_55488282	121	160	98	98
chr1_55841152_55841917	255	254	196	196
chr1_56167528_56168293	73	104	93	93
chr1_56874623_56875242	13	14	7	7
chr1_57174766_57175531	114	138	114	114
chr1_57286490_57287255	104	111	105	105
chr1_57297366_57298131	195	202	174	174
chr1_57433722_57434487	259	247	170	170
chr1_57483212_57483977	65	126	75	75
chr1_58512717_58513482	86	112	78	78
chr1_58620812_58621577	25	46	26	26
chr1_58628449_58629214	18	30	14	14
chr1_58717152_58717917	61	102	52	52
chr1_58981333_58981991	13	12	11	11
chr1_59012159_59012924	80	118	65	65
chr1_59118063_59118828	54	89	62	62
chr1_59234713_59235478	68	85	71	71
chr1_60164734_60165499	218	195	178	178
chr1_60183500_60184265	12	21	13	13
chr1_60412798_60413563	164	175	115	115
chr1_60436863_60437628	111	178	133	133
chr1_60442269_60443034	170	174	145	145
chr1_60746793_60747558	10	24	10	10
chr1_61314048_61314813	14	22	13	13
chr1_61515350_61516115	192	253	218	218
chr1_62012751_62013516	11	17	11	11
chr1_62054142_62054907	76	119	53	53
chr1_62535906_62536671	13	24	17	17
chr1_62548229_62548994	158	238	148	148
chr1_62601210_62601975	29	52	32	32
chr1_62609722_62610487	39	57	33	33
chr1_62641140_62641765	18	26	8	8
chr1_62799891_62800656	15	14	19	19
chr1_62856867_62857632	111	181	124	124
chr1_62872897_62873662	51	102	43	43
chr1_63307061_63307826	82	144	92	92
chr1_63371850_63372615	52	64	40	40
chr1_63377486_63378251	33	30	28	28
chr1_63614596_63615219	14	32	11	11
chr1_63793065_63793830	297	327	240	240
chr1_63907172_63907802	12	20	3	3
chr1_64040723_64041488	93	97	112	112
chr1_64081291_64082056	180	171	178	178
chr1_64383354_64384119	23	26	22	22
chr1_64602572_64603337	107	189	106	106
chr1_64711818_64712583	70	102	77	77
chr1_64734510_64735275	20	31	15	15
chr1_65141240_65142005	43	49	38	38
chr1_65152218_65152983	33	50	17	17
chr1_65525399_65526164	14	24	15	15
chr1_65701376_65702141	29	59	23	23
chr1_65993671_65994436	15	18	17	17
chr1_66153158_66153923	256	300	224	224
chr1_66424403_66425022	15	17	9	9
chr1_66911899_66912664	38	69	53	53
chr1_66969360_66970125	30	71	36	36
chr1_67191534_67192299	143	209	198	198
chr1_67965940_67966705	348	334	323	323
chr1_67997880_67998645	85	186	87	87
chr1_68027130_68027895	20	24	13	13
chr1_68225750_68226515	28	36	30	30
chr1_68231583_68232348	195	201	169	169
chr1_68582138_68582903	118	175	137	137
chr1_68585664_68586429	177	207	198	198
chr1_68628360_68628993	20	20	12	12
chr1_68908570_68909335	32	67	33	33
chr1_69065587_69066206	18	33	9	9
chr1_70598437_70599202	108	108	99	99
chr1_71150783_71151548	98	152	92	92
chr1_71210658_71211423	42	53	29	29
chr1_71431492_71432257	88	83	104	104
chr1_71515474_71516239	67	125	63	63
chr1_74934581_74935204	16	16	9	9
chr1_75155299_75156064	14	43	16	16
chr1_75199270_75199889	7	19	6	6
chr1_75233022_75233787	31	53	21	21
chr1_75237434_75238199	12	20	13	13
chr1_75698810_75699575	39	79	77	77
chr1_75731260_75731879	24	35	11	11
chr1_76080160_76080925	19	29	19	19
chr1_76097835_76098600	27	51	20	20
chr1_76456985_76457750	115	129	87	87
chr1_76619599_76620364	259	285	234	234
chr1_76796475_76797240	152	275	221	221
chr1_77366658_77367423	20	57	29	29
chr1_77833966_77834731	4	1	12	12
chr1_77999195_77999960	134	145	132	132
chr1_78596273_78597038	216	187	209	209
chr1_78798915_78799680	30	35	51	51
chr1_79019427_79020053	12	11	11	11
chr1_79082983_79083748	6	17	18	18
chr1_79141854_79142619	56	76	52	52
chr1_79535257_79536022	13	35	22	22
chr1_79962662_79963427	29	55	24	24
chr1_80083244_80084009	48	50	50	50
chr1_80683602_80684367	26	51	29	29
chr1_81719997_81720762	15	36	18	18
chr1_81879901_81880666	191	201	170	170
chr1_82025116_82025881	12	12	13	13
chr1_82555592_82556357	2	14	15	15
chr1_83240889_83241654	68	90	70	70
chr1_83755120_83755980	22	26	29	29
chr1_84370809_84371574	56	50	70	70
chr1_85086417_85087182	268	235	245	245
chr1_85189863_85190628	193	177	174	174
chr1_85237825_85238590	166	199	134	134
chr1_85247965_85248730	38	63	28	28
chr1_85401691_85402456	112	170	128	128
chr1_85410444_85411209	170	230	213	213
chr1_85464789_85465408	4	12	8	8
chr1_85725073_85725838	186	183	170	170
chr1_86939534_86940299	295	332	235	235
chr1_86965467_86966232	200	164	188	188
chr1_86973580_86974204	19	32	11	11
chr1_87169800_87170565	228	171	161	161
chr1_87207442_87208207	25	15	20	20
chr1_87597210_87597975	88	141	80	80
chr1_87758449_87759214	50	56	28	28
chr1_87791431_87792196	42	68	31	31
chr1_88645986_88646751	26	45	15	15
chr1_89121177_89121942	43	44	31	31
chr1_89265897_89266662	105	82	97	97
chr1_89342839_89343604	88	115	89	89
chr1_89401420_89402185	201	248	208	208
chr1_89439022_89439787	26	34	30	30
chr1_89449321_89450086	18	18	17	17
chr1_89464201_89464966	41	90	37	37
chr1_89823756_89824381	19	25	15	15
chr1_89870677_89871442	6	19	12	12
chr1_90064421_90065186	89	124	91	91
chr1_90228305_90229070	29	36	24	24
chr1_90270008_90270773	128	143	170	170
chr1_90452564_90453329	94	135	98	98
chr1_90511410_90512029	11	11	10	10
chr1_91044553_91045318	146	163	118	118
chr1_91080217_91080982	30	37	38	38
chr1_91186749_91187514	50	122	60	60
chr1_91189056_91189821	118	172	93	93
chr1_91194810_91195575	94	78	71	71
chr1_91630624_91631389	221	217	173	173
chr1_91748051_91748816	28	55	27	27
chr1_93283805_93284431	21	47	20	20
chr1_93297090_93297855	101	170	130	130
chr1_93324222_93324987	247	290	229	229
chr1_93459490_93460255	81	138	110	110
chr1_93486903_93487668	50	79	44	44
chr1_93769993_93770758	149	186	166	166
chr1_94316166_94316790	35	50	30	30
chr1_94374809_94375574	44	73	55	55
chr1_94504879_94505644	138	191	132	132
chr1_94526779_94527544	20	68	30	30
chr1_94608523_94609288	21	15	19	19
chr1_94905457_94906222	47	28	33	33
chr1_94946815_94947580	114	187	107	107
chr1_95271187_95271952	59	78	35	35
chr1_95319761_95320526	92	147	76	76
chr1_95508773_95509538	246	308	235	235
chr1_97061573_97062338	15	25	13	13
chr1_97250473_97251111	9	12	7	7
chr1_97310877_97311496	16	23	11	11
chr1_97431907_97432672	261	271	203	203
chr1_97709387_97710006	12	14	10	10
chr1_98516432_98517197	34	55	22	22
chr1_98519513_98520278	29	22	28	28
chr1_99021921_99022686	50	88	46	46
chr1_99495014_99495633	8	9	8	8
chr1_99645615_99646380	60	71	52	52
chr1_99791562_99792327	19	47	35	35
chr1_100172927_100173692	200	275	183	183
chr1_100194163_100194928	57	56	54	54
chr1_100274061_100274694	10	20	6	6
chr1_100929144_100929769	10	15	8	8
chr1_101285651_101286416	52	79	44	44
chr1_101300365_101301130	14	33	21	21
chr1_101386449_101387214	86	100	55	55
chr1_101704095_101704860	132	119	117	117
chr1_101753794_101754559	90	129	72	72
chr1_101774570_101775335	56	98	64	64
chr1_101782964_101783729	17	24	11	11
chr1_101822729_101823494	182	313	218	218
chr1_101971934_101972699	132	143	134	134
chr1_102032966_102033731	133	152	106	106
chr1_102639605_102640370	12	32	26	26
chr1_102914873_102915452	2	1	6	6
chr1_103435879_103436644	34	50	38	38
chr1_104057352_104058117	11	19	17	17
chr1_104718360_104719125	14	8	15	15
chr1_105322912_105323677	133	142	147	147
chr1_106564722_106565487	13	20	17	17
chr1_106902571_106903336	11	8	12	12
chr1_107684430_107685307	58	65	69	69
chr1_107739402_107740167	132	153	151	151
chr1_107973145_107973764	6	10	4	4
chr1_108019670_108020435	66	91	75	75
chr1_108324637_108325402	10	38	20	20
chr1_108591958_108592723	20	25	26	26
chr1_108667980_108668745	139	186	182	182
chr1_108757096_108757861	63	67	42	42
chr1_109102247_109103012	92	85	80	80
chr1_109370512_109371277	44	84	36	36
chr1_109655090_109655855	221	252	220	220
chr1_109736085_109736850	43	86	48	48
chr1_109805975_109806740	151	158	139	139
chr1_109819846_109820611	167	226	134	134
chr1_109941780_109942545	219	222	176	176
chr1_110033044_110033809	66	115	71	71
chr1_110036300_110036919	17	24	10	10
chr1_110074694_110075459	225	196	251	251
chr1_110172731_110173496	73	72	68	68
chr1_110182639_110183404	299	300	216	216
chr1_110319247_110320012	222	297	194	194
chr1_110465848_110466613	56	99	48	48
chr1_110526824_110527589	66	70	69	69
chr1_110571988_110572753	218	230	153	153
chr1_110596265_110597030	252	258	201	201
chr1_110602501_110603266	207	230	170	170
chr1_110630484_110631249	101	144	90	90
chr1_110648597_110649216	29	39	13	13
chr1_110658889_110659654	381	376	303	303
chr1_110739317_110740082	172	235	166	166
chr1_110745405_110746170	115	157	120	120
chr1_110955018_110955638	13	34	9	9
chr1_111002688_111003453	63	126	68	68
chr1_111038418_111039183	256	272	217	217
chr1_111066897_111067662	27	46	14	14
chr1_111090875_111091494	9	11	5	5
chr1_111097706_111098471	10	19	20	20
chr1_111161760_111162525	299	385	325	325
chr1_111173209_111173974	99	135	96	96
chr1_111308503_111309268	43	54	24	24
chr1_111323283_111324048	154	182	135	135
chr1_111325717_111326482	214	224	170	170
chr1_111372389_111373154	248	339	255	255
chr1_111572989_111573608	44	62	49	49
chr1_111574740_111575505	231	263	246	246
chr1_111765294_111766059	77	102	62	62
chr1_112050648_112051413	224	166	192	192
chr1_112113209_112113828	18	20	9	9
chr1_112257302_112258067	116	95	80	80
chr1_112289667_112290432	57	66	52	52
chr1_112912101_112912866	192	208	148	148
chr1_112933245_112934010	234	260	171	171
chr1_113258690_113259455	130	219	93	93
chr1_113423356_113424121	15	41	17	17
chr1_114220319_114221084	35	43	31	31
chr1_114378088_114378853	82	90	84	84
chr1_114574541_114575306	12	26	21	21
chr1_114825213_114825978	79	109	71	71
chr1_114888923_114889688	49	93	63	63
chr1_115521731_115522496	101	126	78	78
chr1_115594914_115595679	58	132	75	75
chr1_115655215_115655980	228	238	198	198
chr1_116012088_116012853	135	215	141	141
chr1_116138237_116139002	56	94	76	76
chr1_116249267_116250032	143	136	128	128
chr1_116350168_116350933	15	26	15	15
chr1_116523906_116524525	11	24	11	11
chr1_116563098_116563863	108	163	121	121
chr1_116681444_116682209	143	174	107	107
chr1_116710783_116711548	18	26	18	18
chr1_117027723_117028352	16	26	9	9
chr1_117041475_117042240	14	33	28	28
chr1_117117037_117117802	61	96	34	34
chr1_117267188_117267953	147	163	127	127
chr1_117306486_117307251	12	18	14	14
chr1_117597784_117598549	99	109	63	63
chr1_118077425_118078190	34	49	19	19
chr1_118301267_118302032	146	172	109	109
chr1_118437956_118438721	10	25	16	16
chr1_118693756_118694521	18	28	30	30
chr1_119003590_119004355	10	24	17	17
chr1_119551176_119551795	12	16	7	7
chr1_119817831_119818596	75	140	48	48
chr1_120154030_120154795	202	208	167	167
chr1_120217973_120218738	123	154	131	131
chr1_120286512_120287277	141	139	156	156
chr1_120351364_120352129	79	150	97	97
chr1_120369492_120370257	67	104	79	79
chr1_120386632_120387397	30	23	18	18
chr1_120413329_120414094	10	38	23	23
chr1_120428598_120429363	101	114	79	79
chr1_120510446_120511211	199	237	186	186
chr1_120925192_120925957	154	170	181	181
chr1_121189036_121189660	17	21	11	11
chr1_121357634_121358399	22	5	33	33
chr1_121484928_121485693	2790	1062	3066	3066
chr1_144917799_144918564	50	118	80	80
chr1_145058845_145059465	12	44	13	13
chr1_145293097_145293862	68	76	48	48
chr1_145427201_145427966	156	158	138	138
chr1_145457040_145457805	59	81	55	55
chr1_145524513_145525157	6	11	7	7
chr1_145542676_145543441	25	31	14	14
chr1_145585183_145585809	25	28	13	13
chr1_145588332_145589581	11	36	25	25
chr1_145713357_145714122	299	253	257	257
chr1_146569770_146570535	27	26	16	16
chr1_146643862_146644627	9	17	13	13
chr1_146861481_146862246	63	127	70	70
chr1_147099095_147099860	251	239	224	224
chr1_147112366_147113131	56	94	50	50
chr1_147113650_147114269	28	37	29	29
chr1_147137395_147138160	11	22	19	19
chr1_147364658_147365423	66	90	105	105
chr1_147553276_147554041	226	305	180	180
chr1_149105601_149106366	15	30	21	21
chr1_149192463_149193228	91	119	94	94
chr1_149379019_149380117	111	131	132	132
chr1_149764256_149765021	188	187	209	209
chr1_149933823_149934450	18	35	9	9
chr1_150193658_150194423	38	30	36	36
chr1_150436629_150437394	65	71	58	58
chr1_150504821_150505586	17	43	23	23
chr1_150532171_150532936	158	181	107	107
chr1_150593888_150594507	10	15	7	7
chr1_150802019_150802784	24	34	23	23
chr1_150894748_150895513	29	24	21	21
chr1_150951758_150952523	404	489	407	407
chr1_150968176_150968941	230	260	178	178
chr1_150996882_150997526	6	19	12	12
chr1_151020820_151021439	14	23	8	8
chr1_151043304_151044069	68	81	61	61
chr1_151072084_151072849	51	79	48	48
chr1_151128285_151129050	31	47	22	22
chr1_151148312_151148931	14	19	10	10
chr1_151223961_151224726	25	40	33	33
chr1_151273165_151273930	151	215	113	113
chr1_151313151_151313916	13	29	14	14
chr1_151506959_151507724	34	62	33	33
chr1_151566422_151567187	72	132	90	90
chr1_151974014_151974779	45	83	52	52
chr1_151990833_151991598	21	38	17	17
chr1_152006832_152007597	128	144	69	69
chr1_152024835_152025600	228	279	211	211
chr1_152157933_152158552	33	58	29	29
chr1_152160851_152161616	147	140	119	119
chr1_152319406_152320171	45	71	65	65
chr1_152433857_152434622	95	137	78	78
chr1_152467373_152468138	24	26	13	13
chr1_152595600_152596219	15	11	9	9
chr1_152626286_152627051	19	34	31	31
chr1_152842101_152842866	71	147	85	85
chr1_152843413_152844039	80	76	73	73
chr1_153195331_153196096	49	80	43	43
chr1_153201544_153202309	55	82	40	40
chr1_153250155_153250920	112	122	78	78
chr1_153260938_153261703	116	138	96	96
chr1_153324721_153325486	227	248	192	192
chr1_153377008_153377773	242	194	162	162
chr1_153437985_153438750	208	219	191	191
chr1_153467194_153467959	159	205	163	163
chr1_153505453_153506079	9	20	9	9
chr1_153540801_153541566	389	403	419	419
chr1_153599743_153600508	24	63	18	18
chr1_153649940_153650705	28	56	36	36
chr1_153721686_153722451	77	145	56	56
chr1_153744185_153744950	33	46	23	23
chr1_153769494_153770259	154	203	145	145
chr1_153918822_153919587	39	33	46	46
chr1_153959008_153959773	57	98	42	42
chr1_154118383_154119004	6	20	6	6
chr1_154296836_154297601	196	210	182	182
chr1_154307347_154308112	133	144	107	107
chr1_154317494_154318259	98	88	103	103
chr1_154452102_154452867	52	71	46	46
chr1_154518767_154519394	11	22	10	10
chr1_154531772_154532537	45	88	24	24
chr1_154791876_154792641	25	40	26	26
chr1_154835904_154836669	88	138	92	92
chr1_154850817_154851440	19	25	5	5
chr1_154971441_154972077	17	16	13	13
chr1_155022716_155023481	74	82	64	64
chr1_155033783_155034548	229	267	155	155
chr1_155057022_155057641	48	92	57	57
chr1_155058335_155059100	416	363	310	310
chr1_155063723_155064488	330	257	269	269
chr1_155140139_155140904	326	316	265	265
chr1_155145529_155146195	64	104	40	40
chr1_155148884_155149649	237	230	177	177
chr1_155163059_155163824	135	165	139	139
chr1_155176491_155177110	10	19	9	9
chr1_155220263_155221028	285	276	225	225
chr1_155292849_155293614	122	130	140	140
chr1_155698698_155699463	17	20	12	12
chr1_155958979_155959744	182	274	181	181
chr1_156023262_156024027	14	23	15	15
chr1_156060310_156061075	93	113	91	91
chr1_156066195_156066960	30	72	29	29
chr1_156095597_156096216	24	28	16	16
chr1_156099896_156100661	80	103	63	63
chr1_156110807_156111572	16	44	16	16
chr1_156195004_156195769	47	104	60	60
chr1_156326495_156327260	39	67	36	36
chr1_156355203_156355968	199	134	194	194
chr1_156415403_156416168	164	180	142	142
chr1_156450376_156450997	15	26	11	11
chr1_156553620_156554385	167	208	131	131
chr1_156595414_156596179	97	85	76	76
chr1_156597051_156597670	19	21	10	10
chr1_156627038_156627803	153	169	103	103
chr1_156629496_156630261	58	75	49	49
chr1_156659094_156659859	42	45	23	23
chr1_156675532_156676297	209	213	147	147
chr1_156695392_156696157	87	100	77	77
chr1_156766927_156767692	14	37	13	13
chr1_156808480_156809245	191	202	160	160
chr1_156879832_156880597	323	257	260	260
chr1_156889819_156890728	78	107	85	85
chr1_157059721_157060486	300	315	249	249
chr1_157125616_157126381	359	310	276	276
chr1_157132958_157133930	44	60	69	69
chr1_157339485_157340250	260	294	249	249
chr1_157346834_157347599	26	43	24	24
chr1_157458972_157459737	38	76	45	45
chr1_157465667_157466432	229	297	195	195
chr1_157549756_157550521	16	40	15	15
chr1_157933242_157934007	35	56	29	29
chr1_157961609_157962228	15	26	8	8
chr1_158005595_158006360	186	211	170	170
chr1_158056914_158057679	22	46	24	24
chr1_158065352_158066117	118	149	98	98
chr1_158094578_158095343	195	223	159	159
chr1_158173408_158174173	13	27	14	14
chr1_158968273_158969038	259	299	277	277
chr1_159041575_159042340	153	212	140	140
chr1_159058799_159059564	110	137	111	111
chr1_159101885_159102650	30	41	24	24
chr1_159130596_159131361	16	27	11	11
chr1_159167562_159168327	171	258	148	148
chr1_159181105_159181870	190	240	189	189
chr1_159183756_159184521	146	157	121	121
chr1_159750066_159750831	62	99	59	59
chr1_159791056_159791821	15	33	25	25
chr1_159905993_159906758	320	324	277	277
chr1_159977196_159977961	179	197	164	164
chr1_160016251_160017016	8	18	12	12
chr1_160048202_160048967	222	233	207	207
chr1_160055214_160055979	110	152	91	91
chr1_160070569_160071334	125	195	124	124
chr1_160162652_160163417	248	279	290	290
chr1_160260906_160261671	146	171	117	117
chr1_160324059_160324699	6	17	11	11
chr1_160576711_160577476	31	65	38	38
chr1_160588316_160589081	127	113	86	86
chr1_160696414_160697179	23	44	34	34
chr1_160747071_160747836	53	85	42	42
chr1_160804544_160805309	57	53	41	41
chr1_160959828_160960593	233	148	170	170
chr1_161011082_161011847	50	70	43	43
chr1_161067223_161067988	21	23	29	29
chr1_161162105_161162870	74	83	69	69
chr1_161179374_161180139	24	46	20	20
chr1_161196932_161197697	306	311	281	281
chr1_161261113_161261878	90	123	92	92
chr1_161409863_161410628	23	38	27	27
chr1_161456603_161457368	127	174	154	154
chr1_161711041_161711806	105	150	89	89
chr1_161762324_161762943	6	14	4	4
chr1_161874934_161875575	6	23	6	6
chr1_162320432_162321051	9	15	10	10
chr1_162361699_162362464	24	53	30	30
chr1_162583256_162584021	22	43	30	30
chr1_162817433_162818198	245	299	285	285
chr1_163041459_163042078	17	25	9	9
chr1_163121543_163122308	14	7	12	12
chr1_163379554_163380319	288	298	244	244
chr1_163498395_163499014	17	17	12	12
chr1_163565810_163566445	5	18	7	7
chr1_163843197_163843962	8	22	14	14
chr1_164061738_164062357	14	16	13	13
chr1_164594045_164594810	37	43	38	38
chr1_164642684_164643449	254	213	234	234
chr1_164756351_164757116	131	222	155	155
chr1_165083316_165084081	68	122	63	63
chr1_165112513_165113278	94	139	104	104
chr1_165113911_165114545	34	31	21	21
chr1_165226980_165227745	175	233	157	157
chr1_165336423_165337188	225	189	220	220
chr1_165338352_165338981	41	72	42	42
chr1_165361919_165362684	157	201	165	165
chr1_165561991_165562756	368	383	291	291
chr1_165883309_165883931	17	24	11	11
chr1_165893794_165894413	32	65	33	33
chr1_165897112_165897877	174	242	135	135
chr1_166102292_166103057	91	87	57	57
chr1_166448078_166448843	174	167	156	156
chr1_166791424_166792189	39	84	43	43
chr1_167028171_167028936	253	333	231	231
chr1_167035638_167036403	248	193	188	188
chr1_167236857_167237622	196	220	177	177
chr1_167251638_167252217	3	7	1	1
chr1_167502836_167503601	150	202	119	119
chr1_167509405_167510170	273	328	234	234
chr1_167525146_167525911	180	280	161	161
chr1_167656952_167657717	102	175	105	105
chr1_167772374_167773139	163	206	154	154
chr1_168051375_168051994	65	105	49	49
chr1_168053793_168054558	407	290	290	290
chr1_168114856_168115621	318	319	263	263
chr1_168147773_168148538	15	23	16	16
chr1_168204344_168204979	16	26	7	7
chr1_168311808_168312447	23	32	12	12
chr1_168421377_168422142	29	27	24	24
chr1_168606424_168607189	94	108	94	94
chr1_169075097_169075862	26	16	22	22
chr1_169317491_169318256	155	156	125	125
chr1_169515452_169516217	75	117	53	53
chr1_169778585_169779350	16	39	22	22
chr1_170640259_170641024	94	106	83	83
chr1_170658534_170659153	14	39	12	12
chr1_170898716_170899481	8	12	12	12
chr1_170935993_170936758	8	21	18	18
chr1_171157619_171158384	112	199	156	156
chr1_171195702_171196467	19	36	22	22
chr1_171214412_171215177	23	40	24	24
chr1_171624412_171625177	14	22	15	15
chr1_171898086_171898851	68	68	49	49
chr1_172104016_172104781	8	30	15	15
chr1_172368510_172369129	6	13	3	3
chr1_172412911_172413676	62	120	61	61
chr1_172418924_172419550	13	12	10	10
chr1_172688590_172689355	58	66	63	63
chr1_172696924_172697689	90	146	96	96
chr1_173224163_173224928	29	53	21	21
chr1_173389258_173390023	147	223	149	149
chr1_173400160_173400925	26	59	23	23
chr1_173883206_173883971	28	46	27	27
chr1_174083801_174084566	156	214	208	208
chr1_174186658_174187423	6	16	12	12
chr1_174712902_174713667	27	34	25	25
chr1_174952161_174952926	57	84	56	56
chr1_174967415_174968180	54	94	71	71
chr1_174998741_174999360	12	20	6	6
chr1_175094227_175094992	16	39	25	25
chr1_175115519_175116284	137	144	108	108
chr1_175120942_175121707	181	212	157	157
chr1_175123860_175124490	25	39	12	12
chr1_175286157_175286922	205	227	165	165
chr1_175288561_175289326	85	130	96	96
chr1_175307437_175308202	186	184	182	182
chr1_175342733_175343498	11	18	15	15
chr1_175403216_175403981	108	161	96	96
chr1_175450077_175450842	59	76	51	51
chr1_175712519_175713284	23	45	23	23
chr1_175726311_175727076	110	165	109	109
chr1_175793153_175793918	13	20	12	12
chr1_175856910_175857675	57	73	56	56
chr1_176042498_176043263	10	20	15	15
chr1_176343930_176344695	76	128	84	84
chr1_176528746_176529511	34	54	48	48
chr1_176849910_176850675	158	215	152	152
chr1_176866739_176867504	366	262	249	249
chr1_176917968_176918733	57	151	80	80
chr1_176923256_176923892	8	17	10	10
chr1_177150617_177151382	36	63	67	67
chr1_177154180_177154945	88	145	112	112
chr1_177225120_177225885	20	28	17	17
chr1_177324531_177325296	29	34	18	18
chr1_177917293_177918058	186	247	212	212
chr1_178000748_178001513	145	186	120	120
chr1_178268840_178269605	298	239	251	251
chr1_178279562_178280327	101	167	112	112
chr1_178348773_178349538	160	142	137	137
chr1_178470676_178471441	208	244	184	184
chr1_178501241_178502006	191	256	199	199
chr1_178511444_178512209	252	196	194	194
chr1_178702926_178703701	34	24	37	37
chr1_178737258_178738023	269	243	231	231
chr1_178971636_178972401	125	155	109	109
chr1_179162783_179163548	17	47	29	29
chr1_179338697_179339462	87	115	71	71
chr1_179778752_179779517	260	284	213	213
chr1_179783714_179784479	162	163	202	202
chr1_180137640_180138405	9	30	14	14
chr1_180147772_180148537	110	142	95	95
chr1_180221573_180222338	99	148	122	122
chr1_180384952_180385717	7	13	12	12
chr1_180451385_180452150	132	122	126	126
chr1_180484753_180485518	24	49	20	20
chr1_180502428_180503193	124	152	99	99
chr1_180832123_180832888	68	114	77	77
chr1_181007350_181008115	358	383	303	303
chr1_181104326_181105091	15	26	21	21
chr1_181111399_181112164	214	230	190	190
chr1_181158819_181159584	278	231	193	193
chr1_181393880_181394645	254	175	169	169
chr1_181473205_181473970	27	40	32	32
chr1_182004330_182005095	12	29	32	32
chr1_182037906_182038671	127	182	126	126
chr1_182053857_182054622	97	139	97	97
chr1_182112112_182112877	276	246	229	229
chr1_182365658_182366423	48	90	56	56
chr1_182414960_182415725	158	147	122	122
chr1_182564594_182565359	168	189	168	168
chr1_182570271_182571036	249	246	220	220
chr1_183196924_183197689	20	46	23	23
chr1_183250403_183251168	210	231	152	152
chr1_183275601_183276220	15	18	9	9
chr1_183624425_183625190	247	252	207	207
chr1_183654040_183654805	145	212	159	159
chr1_183884885_183885650	118	224	155	155
chr1_183891207_183891972	9	17	27	27
chr1_184191493_184192258	281	304	276	276
chr1_184409874_184410647	7	15	21	21
chr1_184632901_184633666	165	162	158	158
chr1_184774524_184775289	42	77	36	36
chr1_185565046_185565811	27	61	44	44
chr1_185886605_185887370	6	15	17	17
chr1_186273971_186274597	8	17	6	6
chr1_186299718_186300483	73	73	60	60
chr1_186451594_186452359	41	85	31	31
chr1_186691647_186692412	49	50	28	28
chr1_186956695_186957460	11	16	13	13
chr1_188637016_188637781	6	16	13	13
chr1_188751158_188751923	37	58	22	22
chr1_189398439_189399204	26	33	31	31
chr1_189828319_189829084	149	169	102	102
chr1_190053454_190054219	142	204	129	129
chr1_192414794_192415559	301	279	227	227
chr1_192443093_192443712	17	14	7	7
chr1_192457034_192457799	53	96	76	76
chr1_192762908_192763523	12	10	11	11
chr1_192967515_192968280	13	25	13	13
chr1_193090744_193091379	12	8	4	4
chr1_193151964_193152729	131	242	157	157
chr1_194086589_194087208	15	11	4	4
chr1_194909020_194909649	5	15	11	11
chr1_195702796_195703561	52	55	35	35
chr1_195727460_195728225	7	5	20	20
chr1_196117319_196118084	21	37	16	16
chr1_196341874_196342639	181	210	130	130
chr1_196692267_196693032	17	25	18	18
chr1_197296776_197297423	6	13	7	7
chr1_197490083_197490848	14	30	25	25
chr1_197495705_197496470	271	189	177	177
chr1_198025183_198025948	18	20	11	11
chr1_198125037_198125802	100	117	77	77
chr1_199082284_199082903	10	15	11	11
chr1_200227340_200228105	16	19	12	12
chr1_200248729_200249494	52	102	78	78
chr1_200276406_200277171	159	193	164	164
chr1_200457626_200458391	23	53	23	23
chr1_200479052_200479817	333	346	311	311
chr1_200771845_200772610	38	85	60	60
chr1_200940863_200941628	317	209	234	234
chr1_200948510_200949275	128	169	109	109
chr1_200989993_200990612	12	18	12	12
chr1_201083140_201083784	6	12	2	2
chr1_201088257_201088876	8	26	5	5
chr1_201191812_201192577	180	239	152	152
chr1_201223471_201224236	290	269	185	185
chr1_201315608_201316233	26	54	34	34
chr1_201317008_201317773	77	101	68	68
chr1_201330568_201331333	29	77	28	28
chr1_201345801_201346566	14	32	15	15
chr1_201354224_201354989	53	94	67	67
chr1_201377160_201377925	409	304	262	262
chr1_201404587_201405352	138	137	126	126
chr1_201417047_201417812	51	69	39	39
chr1_201481904_201482669	91	147	96	96
chr1_201528580_201529345	190	254	183	183
chr1_201673109_201673874	206	204	180	180
chr1_201678396_201679161	107	183	118	118
chr1_201761947_201762712	75	149	81	81
chr1_201797811_201798576	146	148	133	133
chr1_201864844_201865609	60	90	47	47
chr1_201968556_201969321	54	87	63	63
chr1_201978447_201979212	117	177	134	134
chr1_202104119_202104884	250	347	229	229
chr1_202153603_202154368	56	106	77	77
chr1_202157910_202158557	120	194	114	114
chr1_202161743_202162508	78	118	103	103
chr1_202205286_202206051	304	342	245	245
chr1_202284541_202285306	17	48	13	13
chr1_202312702_202313467	52	105	69	69
chr1_202348657_202349314	24	12	14	14
chr1_202540665_202541430	51	82	43	43
chr1_202968189_202968954	9	19	11	11
chr1_203008264_203009029	21	46	30	30
chr1_203009125_203009744	20	44	15	15
chr1_203025522_203026287	14	14	18	18
chr1_203053448_203054213	115	115	108	108
chr1_203141115_203141880	185	222	150	150
chr1_203185131_203185896	166	218	173	173
chr1_203236172_203236937	70	116	80	80
chr1_203237985_203238750	173	184	128	128
chr1_203241979_203242744	191	145	140	140
chr1_203307357_203308122	142	159	117	117
chr1_203311396_203312161	142	182	118	118
chr1_203456284_203457374	244	294	207	207
chr1_203473582_203474347	21	61	41	41
chr1_203671017_203671782	181	194	122	122
chr1_203830206_203830971	85	136	106	106
chr1_204097985_204098750	176	181	155	155
chr1_204131392_204132157	212	298	231	231
chr1_204176031_204176796	99	135	92	92
chr1_204332597_204333362	119	134	79	79
chr1_204367459_204368224	76	123	60	60
chr1_204400242_204401007	58	109	81	81
chr1_204415312_204416077	27	51	29	29
chr1_204472093_204472858	13	19	15	15
chr1_204569856_204570621	31	46	42	42
chr1_204585628_204586393	10	14	13	13
chr1_204715778_204716543	503	465	391	391
chr1_204760715_204761480	82	121	95	95
chr1_204775851_204776616	112	149	103	103
chr1_204910640_204911405	221	292	193	193
chr1_204944569_204945334	61	99	53	53
chr1_204958234_204958999	174	193	176	176
chr1_205030508_205031273	97	152	86	86
chr1_205110559_205111324	41	55	53	53
chr1_205225091_205225856	107	96	80	80
chr1_205242387_205243152	194	216	194	194
chr1_205323216_205323981	113	163	125	125
chr1_205407754_205408525	11	13	11	11
chr1_205454421_205455186	371	313	339	339
chr1_205457027_205457792	59	120	77	77
chr1_205497893_205498658	149	152	101	101
chr1_205553767_205554532	41	52	23	23
chr1_205560740_205561505	88	134	72	72
chr1_205627862_205628627	24	42	15	15
chr1_205680043_205680808	20	60	40	40
chr1_205887904_205888669	59	83	57	57
chr1_206234166_206234931	180	179	114	114
chr1_206634968_206635733	241	286	221	221
chr1_206652661_206653426	51	78	37	37
chr1_206663175_206663940	86	125	110	110
chr1_206717923_206718688	339	283	283	283
chr1_206756805_206757570	140	187	147	147
chr1_206781356_206781961	10	13	10	10
chr1_206785487_206786252	15	33	20	20
chr1_206831596_206832361	264	246	241	241
chr1_206837350_206838115	184	234	194	194
chr1_206899440_206900205	194	231	162	162
chr1_206907665_206908430	141	168	125	125
chr1_206971266_206972031	24	60	29	29
chr1_207038058_207038823	273	235	208	208
chr1_207055681_207056446	38	55	35	35
chr1_207084237_207085002	141	151	133	133
chr1_207085710_207086343	71	94	58	58
chr1_207104928_207105547	16	34	10	10
chr1_207106489_207107254	47	92	48	48
chr1_207250937_207251702	120	164	114	114
chr1_207257854_207258619	12	25	18	18
chr1_207793483_207794248	72	120	122	122
chr1_207970503_207971268	27	52	36	36
chr1_208042181_208042946	112	103	95	95
chr1_208058208_208058973	234	220	235	235
chr1_208136687_208137452	170	155	184	184
chr1_208155126_208155891	48	96	57	57
chr1_208166641_208167406	21	36	14	14
chr1_208170919_208171684	21	39	23	23
chr1_208194947_208195712	28	40	24	24
chr1_208266994_208267613	10	27	11	11
chr1_208418381_208419146	55	79	49	49
chr1_208634915_208635548	14	31	12	12
chr1_208825458_208826223	64	130	92	92
chr1_209363794_209364559	119	185	113	113
chr1_209375964_209376729	48	62	45	45
chr1_209421810_209422575	219	282	228	228
chr1_209508242_209509007	74	148	80	80
chr1_209527563_209528182	11	27	6	6
chr1_209608842_209609607	92	149	99	99
chr1_209686473_209687238	78	114	78	78
chr1_209739164_209739929	25	34	22	22
chr1_209742594_209743359	47	79	65	65
chr1_209749937_209750556	7	25	8	8
chr1_209800761_209801526	146	207	161	161
chr1_209866051_209866816	55	77	52	52
chr1_209920758_209921523	252	302	249	249
chr1_209996228_209996993	244	289	249	249
chr1_210033461_210034226	52	106	59	59
chr1_210484251_210485016	8	25	21	21
chr1_210547515_210548280	69	136	108	108
chr1_210573795_210574442	26	51	12	12
chr1_210580371_210581136	104	175	97	97
chr1_211123111_211123876	48	59	30	30
chr1_211526027_211526792	126	164	109	109
chr1_211643212_211643977	17	39	22	22
chr1_211688579_211689344	155	143	175	175
chr1_211828353_211829118	78	125	66	66
chr1_211871630_211872395	281	239	207	207
chr1_212185086_212185851	152	189	127	127
chr1_212235994_212236759	36	40	38	38
chr1_212541134_212541899	25	36	18	18
chr1_212629003_212629768	294	330	317	317
chr1_212630972_212631598	66	101	70	70
chr1_212650275_212651040	92	139	78	78
chr1_212768981_212769746	32	38	27	27
chr1_212803180_212803945	74	98	62	62
chr1_212838428_212839299	12	43	23	23
chr1_212922978_212923743	97	156	114	114
chr1_213140905_213141670	8	13	20	20
chr1_213168694_213169326	9	16	11	11
chr1_213295582_213296347	15	27	16	16
chr1_213417742_213418507	291	245	257	257
chr1_213547452_213548217	51	122	81	81
chr1_214434632_214435397	116	151	84	84
chr1_214504975_214505740	107	120	105	105
chr1_214801295_214802060	236	246	211	211
chr1_214811001_214811610	11	7	4	4
chr1_215699683_215700448	139	148	115	115
chr1_215883514_215884279	61	96	63	63
chr1_217507105_217507870	50	96	37	37
chr1_218512388_218513153	39	45	21	21
chr1_218694733_218695498	132	158	142	142
chr1_219377763_219378528	33	56	33	33
chr1_219558973_219559738	18	32	10	10
chr1_219589806_219590571	37	61	25	25
chr1_220219570_220220335	19	38	34	34
chr1_220469404_220470169	16	35	15	15
chr1_220627297_220628062	78	76	63	63
chr1_220853287_220853906	14	14	11	11
chr1_220863222_220863987	300	267	256	256
chr1_220899724_220900489	32	72	50	50
chr1_220906228_220906993	233	285	271	271
chr1_220948378_220949143	286	262	269	269
chr1_220976770_220977535	210	119	134	134
chr1_220983286_220984051	259	311	264	264
chr1_221047315_221048080	7	21	12	12
chr1_221376614_221377379	210	194	184	184
chr1_221608568_221609333	299	256	235	235
chr1_221866251_221867016	37	44	34	34
chr1_222030225_222030990	26	58	42	42
chr1_222269309_222270074	235	219	154	154
chr1_222340170_222340935	62	86	61	61
chr1_222344284_222344903	17	23	11	11
chr1_222628312_222629077	2	7	14	14
chr1_222638465_222639230	373	252	261	261
chr1_222807548_222808313	210	206	179	179
chr1_223250638_223251403	10	16	15	15
chr1_223263291_223263910	29	37	9	9
chr1_223296823_223297588	292	275	250	250
chr1_223306818_223307583	358	303	379	379
chr1_223704881_223705646	26	50	21	21
chr1_223815680_223816445	136	123	98	98
chr1_223857993_223858758	11	29	16	16
chr1_223883934_223884699	277	275	173	173
chr1_224192062_224192827	46	72	34	34
chr1_224238314_224239079	65	75	58	58
chr1_224340360_224341125	32	35	40	40
chr1_224645020_224645785	277	286	307	307
chr1_224701217_224701982	170	175	129	129
chr1_224832072_224832837	240	231	228	228
chr1_225039001_225039766	32	69	30	30
chr1_225040539_225041158	17	20	11	11
chr1_225110068_225110833	22	49	33	33
chr1_225662405_225663170	988	684	670	670
chr1_225668404_225669169	89	132	79	79
chr1_226098815_226099580	40	31	12	12
chr1_226149864_226150629	31	40	16	16
chr1_226163472_226164237	238	244	238	238
chr1_226175017_226175782	40	46	21	21
chr1_226251835_226252968	169	131	168	168
chr1_226308821_226309722	74	75	102	102
chr1_226312676_226313441	343	330	307	307
chr1_226384501_226385266	164	174	128	128
chr1_226595504_226596269	192	194	151	151
chr1_226796206_226796971	268	243	223	223
chr1_226813944_226814709	226	239	188	188
chr1_226821593_226822358	127	159	106	106
chr1_226898716_226899481	72	68	58	58
chr1_227015558_227016323	55	87	63	63
chr1_227636576_227637341	39	84	48	48
chr1_227730046_227730811	169	170	133	133
chr1_227917852_227918617	8	21	12	12
chr1_228141389_228142154	34	60	33	33
chr1_228353044_228353809	23	50	32	32
chr1_228496623_228497242	16	24	5	5
chr1_228646698_228647463	40	42	38	38
chr1_228659366_228659992	12	15	7	7
chr1_228688428_228689193	230	229	192	192
chr1_228799968_228800733	26	46	24	24
chr1_229363017_229363782	208	226	167	167
chr1_229796789_229797554	28	73	34	34
chr1_229850513_229851278	28	31	26	26
chr1_230256413_230257178	100	100	100	100
chr1_230302938_230303703	76	79	71	71
chr1_230446110_230446875	147	201	143	143
chr1_230777723_230778488	352	355	331	331
chr1_231052774_231053539	171	194	171	171
chr1_231227516_231228281	51	85	45	45
chr1_231346849_231347614	81	125	82	82
chr1_231827200_231827965	71	93	60	60
chr1_231892339_231893104	188	192	161	161
chr1_231942271_231942904	7	28	9	9
chr1_232002228_232002993	160	136	167	167
chr1_232067385_232068150	153	133	120	120
chr1_232346687_232347452	64	109	60	60
chr1_232771304_232772069	23	52	44	44
chr1_233088553_233089179	27	40	7	7
chr1_233500251_233501016	160	132	120	120
chr1_233653902_233654667	83	103	81	81
chr1_233926634_233927399	190	217	171	171
chr1_234201474_234202093	11	13	8	8
chr1_234225035_234225659	23	31	9	9
chr1_234290236_234291001	207	225	170	170
chr1_234445490_234446255	282	275	208	208
chr1_234462143_234462908	104	106	86	86
chr1_235158275_235158951	13	11	4	4
chr1_235256950_235257715	134	199	138	138
chr1_235267286_235268051	215	214	180	180
chr1_235578437_235579202	43	70	49	49
chr1_235580208_235580973	193	202	143	143
chr1_235676879_235677644	97	153	113	113
chr1_236134825_236135590	36	34	28	28
chr1_236266736_236267501	268	218	245	245
chr1_236272466_236273231	78	90	68	68
chr1_236653033_236653798	186	171	137	137
chr1_236772214_236772979	21	36	20	20
chr1_236911619_236912384	12	22	11	11
chr1_236922375_236923140	118	138	82	82
chr1_237031974_237032739	189	234	194	194
chr1_237549694_237550459	33	52	32	32
chr1_237725360_237726125	14	29	30	30
chr1_237969866_237970631	180	182	150	150
chr1_237977420_237978185	52	69	57	57
chr1_238014327_238015092	41	71	62	62
chr1_238027364_238028129	152	160	132	132
chr1_238064389_238065154	17	23	12	12
chr1_238101680_238102445	54	38	48	48
chr1_238401802_238402567	56	63	49	49
chr1_239171755_239172523	8	10	19	19
chr1_239568581_239569346	45	72	50	50
chr1_239839692_239840457	8	9	19	19
chr1_240061208_240061973	216	210	196	196
chr1_240116086_240116851	83	95	83	83
chr1_240139453_240140218	224	240	224	224
chr1_240150260_240151025	25	26	21	21
chr1_240167220_240167985	247	211	211	211
chr1_240312611_240313376	82	128	95	95
chr1_240352502_240353267	138	136	118	118
chr1_240656204_240656969	10	20	28	28
chr1_240895413_240896178	14	17	14	14
chr1_241051146_241051911	231	276	218	218
chr1_241432239_241433004	14	12	19	19
chr1_241577810_241578605	5	5	16	16
chr1_241774105_241774870	17	44	34	34
chr1_242630720_242631339	11	22	10	10
chr1_242814998_242815621	4	22	9	9
chr1_243488419_243489184	54	127	69	69
chr1_243507069_243507834	141	209	143	143
chr1_243911882_243912501	14	25	12	12
chr1_244436130_244436895	156	160	95	95
chr1_244462558_244463323	88	114	78	78
chr1_244766518_244767283	280	258	238	238
chr1_244959911_244960676	224	234	203	203
chr1_245205787_245206552	214	267	171	171
chr1_245656154_245656919	32	40	30	30
chr1_245942971_245943590	13	12	12	12
chr1_245960709_245961474	89	76	60	60
chr1_246166251_246167016	92	141	98	98
chr1_246660415_246661180	67	76	61	61
chr1_246764414_246765179	18	19	11	11
chr1_246852571_246853336	19	26	18	18
chr1_246859555_246860320	129	109	91	91
chr1_246917023_246917788	22	39	32	32
chr1_247134481_247135246	109	128	88	88
chr1_247309815_247310580	18	27	10	10
chr1_247450624_247451389	86	69	67	67
chr1_247535828_247536593	100	111	75	75
chr1_247553182_247553947	148	184	133	133
chr1_247844415_247845180	55	77	46	46
chr1_248100056_248100821	65	77	53	53
chr1_248406291_248406910	11	23	11	11
chr1_249200412_249201303	13	20	14	14
chr10_122257_123022	19	27	21	21
chr10_182866_183631	53	82	75	75
chr10_276524_277289	83	109	94	94
chr10_556739_557504	236	278	231	231
chr10_1402001_1402766	114	109	87	87
chr10_1462864_1463629	23	48	17	17
chr10_1797553_1798318	41	57	44	44
chr10_2970269_2971034	31	36	18	18
chr10_3234836_3235601	137	182	145	145
chr10_3554274_3555039	14	22	13	13
chr10_3827288_3828083	22	17	15	15
chr10_4698580_4699345	68	86	50	50
chr10_4750418_4751183	137	130	105	105
chr10_4857231_4857996	231	306	301	301
chr10_4891612_4892377	50	118	80	80
chr10_5113719_5114338	11	16	8	8
chr10_5136635_5137400	8	21	14	14
chr10_5425785_5426550	111	99	112	112
chr10_5483828_5484593	185	196	161	161
chr10_5671602_5672367	82	84	53	53
chr10_5915225_5915990	80	80	53	53
chr10_6130459_6131224	250	314	203	203
chr10_6150675_6151440	19	19	24	24
chr10_6244363_6245128	184	197	191	191
chr10_6520568_6521187	14	20	7	7
chr10_6621976_6622741	92	127	116	116
chr10_6689686_6690451	260	233	236	236
chr10_7073753_7074518	164	128	141	141
chr10_7096658_7097423	31	53	34	34
chr10_7162978_7163743	56	143	65	65
chr10_7913759_7914524	230	140	193	193
chr10_8488325_8489090	79	87	48	48
chr10_9250962_9251727	152	162	126	126
chr10_9373311_9374076	127	179	121	121
chr10_10539044_10539809	5	14	10	10
chr10_11207820_11208585	42	59	46	46
chr10_11466308_11467073	28	51	31	31
chr10_11497018_11497783	31	44	25	25
chr10_11513820_11514653	5	25	12	12
chr10_11533441_11534020	3	3	6	6
chr10_11536721_11537486	35	52	23	23
chr10_11799736_11800501	18	56	20	20
chr10_11824585_11825350	44	60	47	47
chr10_11861612_11862377	112	97	105	105
chr10_11895238_11896003	42	51	27	27
chr10_12028427_12029192	42	76	52	52
chr10_12256456_12257221	34	54	58	58
chr10_12752901_12753666	35	51	18	18
chr10_12771693_12772458	100	93	58	58
chr10_12824248_12825013	139	175	139	139
chr10_12889381_12890146	51	71	34	34
chr10_12943907_12944672	36	81	41	41
chr10_13124407_13125026	14	22	18	18
chr10_13202969_13203734	75	125	103	103
chr10_13413693_13414458	135	177	139	139
chr10_13451265_13452030	52	52	36	36
chr10_13482263_13483028	17	33	10	10
chr10_13701782_13702547	85	99	62	62
chr10_13819858_13820477	11	17	7	7
chr10_14074211_14074976	271	286	252	252
chr10_14238701_14239466	178	217	164	164
chr10_14242458_14243223	105	136	105	105
chr10_14438383_14439148	121	117	106	106
chr10_14540695_14541460	24	73	33	33
chr10_14946103_14946868	25	39	31	31
chr10_15148198_15148963	95	151	83	83
chr10_15251621_15252386	96	87	85	85
chr10_15461109_15461874	370	382	280	280
chr10_15475867_15476632	154	197	180	180
chr10_15627052_15627817	309	319	216	216
chr10_15786025_15786790	14	33	26	26
chr10_15866434_15867057	10	16	9	9
chr10_15939906_15940525	41	47	30	30
chr10_15944376_15945141	86	149	133	133
chr10_16158184_16158949	32	60	29	29
chr10_16586962_16587727	15	28	13	13
chr10_16819224_16819989	173	193	137	137
chr10_16869955_16870720	40	42	34	34
chr10_16885152_16885771	10	20	12	12
chr10_17269075_17269840	76	67	91	91
chr10_17299515_17300280	16	26	11	11
chr10_17417787_17418552	241	217	177	177
chr10_17451020_17451659	14	23	10	10
chr10_17649316_17650081	45	89	58	58
chr10_18392998_18393763	70	86	67	67
chr10_20076839_20077604	23	46	26	26
chr10_20108192_20108957	103	123	112	112
chr10_20781142_20781907	23	32	24	24
chr10_21309302_21310067	24	54	24	24
chr10_21460127_21460892	31	49	46	46
chr10_21529885_21530650	14	12	11	11
chr10_21567437_21568202	160	224	182	182
chr10_21784426_21785191	329	245	233	233
chr10_21963924_21964689	85	120	73	73
chr10_22020972_22021835	7	11	16	16
chr10_22299487_22300346	25	14	20	20
chr10_22839469_22840234	44	43	39	39
chr10_23277590_23278355	21	29	16	16
chr10_23356909_23357674	137	227	152	152
chr10_23447131_23447896	72	98	82	82
chr10_23603522_23604287	79	102	92	92
chr10_23945505_23946270	10	15	12	12
chr10_24283180_24283945	111	135	94	94
chr10_24485164_24485929	160	217	155	155
chr10_24608197_24608962	207	240	145	145
chr10_24807706_24808471	24	34	21	21
chr10_24841094_24841867	99	115	74	74
chr10_24845872_24846637	55	72	36	36
chr10_24906503_24907268	133	199	135	135
chr10_25401904_25402669	10	24	19	19
chr10_25989562_25990327	117	143	83	83
chr10_26014659_26015424	55	70	62	62
chr10_26164297_26165062	251	292	192	192
chr10_27014838_27015603	33	35	24	24
chr10_27649307_27650072	51	105	70	70
chr10_27945344_27946109	97	79	78	78
chr10_28034479_28035244	37	18	30	30
chr10_28468206_28468971	39	59	38	38
chr10_28530523_28531288	97	138	83	83
chr10_28670607_28671372	143	204	167	167
chr10_28682695_28683460	112	154	113	113
chr10_28720886_28721651	27	53	37	37
chr10_28916861_28917626	41	53	32	32
chr10_28952581_28953346	10	34	10	10
chr10_29027004_29027633	5	10	5	5
chr10_29280489_29281254	15	25	20	20
chr10_29408115_29408880	142	206	163	163
chr10_29418963_29419728	116	104	110	110
chr10_29528602_29529367	15	16	12	12
chr10_29593289_29594054	37	63	31	31
chr10_29675099_29675864	129	156	108	108
chr10_29681136_29681901	32	80	56	56
chr10_29737751_29738516	265	281	277	277
chr10_29785092_29785857	79	152	86	86
chr10_29801754_29802519	42	45	27	27
chr10_29824213_29824978	33	40	26	26
chr10_29879412_29880177	244	276	261	261
chr10_30024519_30025284	3	16	14	14
chr10_30287055_30287820	31	52	35	35
chr10_30648386_30649151	167	177	172	172
chr10_30681224_30681989	159	159	146	146
chr10_30823254_30824019	184	162	146	146
chr10_30870529_30871294	96	138	134	134
chr10_30879879_30880931	26	22	30	30
chr10_30928679_30929444	188	211	179	179
chr10_30959758_30960523	83	104	59	59
chr10_30976420_30977185	78	88	79	79
chr10_31015517_31016282	225	285	205	205
chr10_31756997_31757762	65	132	89	89
chr10_31909015_31909780	20	50	23	23
chr10_32059031_32059796	24	30	25	25
chr10_32479623_32480388	95	97	90	90
chr10_32496241_32497006	11	36	26	26
chr10_32545382_32546147	18	42	24	24
chr10_32656545_32657310	92	103	70	70
chr10_33297444_33298209	36	53	37	37
chr10_33444551_33445316	13	22	15	15
chr10_33619290_33619909	16	29	13	13
chr10_34927189_34927954	309	260	265	265
chr10_34944312_34945077	150	167	148	148
chr10_35021597_35022362	9	9	12	12
chr10_35097128_35097733	10	4	6	6
chr10_35415435_35416200	257	199	219	219
chr10_35484863_35485486	18	26	13	13
chr10_35507271_35507901	15	17	10	10
chr10_35528727_35529492	93	105	70	70
chr10_35852005_35852770	129	177	90	90
chr10_35924232_35924997	26	27	45	45
chr10_37177768_37178399	9	17	5	5
chr10_38679516_38680281	35	46	32	32
chr10_39075849_39076468	75	75	59	59
chr10_42385180_42385945	438	144	548	548
chr10_42386939_42387704	357	153	484	484
chr10_42392344_42393109	244	83	354	354
chr10_42399998_42400763	187	70	220	220
chr10_42529012_42529777	60	14	71	71
chr10_42596514_42597279	254	133	377	377
chr10_42599411_42600176	389	204	646	646
chr10_42687729_42688494	134	146	92	92
chr10_43239484_43240103	11	25	7	7
chr10_43600715_43601480	53	57	26	26
chr10_43697464_43698083	19	20	10	10
chr10_43751193_43751814	5	14	6	6
chr10_43843687_43844452	160	215	134	134
chr10_44166901_44167666	158	159	165	165
chr10_44178741_44179506	57	64	27	27
chr10_44185268_44186033	29	46	28	28
chr10_44710777_44711396	14	16	8	8
chr10_45012877_45013642	18	47	26	26
chr10_45353002_45353767	155	241	207	207
chr10_45360084_45360849	182	188	145	145
chr10_45427929_45428694	67	98	70	70
chr10_45470168_45470933	75	91	61	61
chr10_45503881_45504646	254	293	180	180
chr10_45730529_45731148	11	30	9	9
chr10_45745305_45746070	20	32	14	14
chr10_46951045_46951810	71	87	78	78
chr10_47377158_47377976	52	100	80	80
chr10_47600291_47601056	190	211	182	182
chr10_48377571_48378336	215	232	184	184
chr10_48398225_48398990	295	298	260	260
chr10_48429344_48430109	34	42	27	27
chr10_48585885_48586650	93	141	105	105
chr10_49368528_49369293	40	57	39	39
chr10_49423315_49424080	147	202	121	121
chr10_49497499_49498264	167	230	150	150
chr10_49527319_49528084	9	9	15	15
chr10_49732117_49733009	87	60	117	117
chr10_49815981_49816746	160	189	127	127
chr10_49822727_49823352	11	15	7	7
chr10_49864090_49864855	74	70	43	43
chr10_49866087_49866852	157	154	114	114
chr10_50110008_50110773	12	29	20	20
chr10_50189172_50189937	34	40	30	30
chr10_50489313_50490078	209	209	192	192
chr10_50615398_50616163	113	85	73	73
chr10_50726839_50727604	25	62	28	28
chr10_50800869_50801634	103	126	67	67
chr10_52070381_52071146	42	93	44	44
chr10_52180825_52181590	25	36	18	18
chr10_52374095_52374860	60	94	54	54
chr10_52770475_52771240	147	183	119	119
chr10_52875486_52876251	7	10	15	15
chr10_53128511_53129276	9	21	15	15
chr10_53148904_53149669	19	28	19	19
chr10_53763878_53764643	29	62	38	38
chr10_53975312_53976077	21	46	36	36
chr10_54074028_54074676	12	25	10	10
chr10_54248540_54249170	16	21	8	8
chr10_54354802_54355567	55	54	50	50
chr10_54404200_54404965	36	47	24	24
chr10_54500420_54501185	216	305	227	227
chr10_54539649_54540414	90	134	87	87
chr10_54643841_54644606	9	13	11	11
chr10_54711461_54712089	5	19	12	12
chr10_55360806_55361571	12	16	12	12
chr10_55483621_55484290	9	12	12	12
chr10_55545783_55546548	39	78	35	35
chr10_56851284_56852049	20	28	25	25
chr10_58583523_58584183	7	21	8	8
chr10_59098657_59099422	35	62	30	30
chr10_59416706_59417471	117	183	126	126
chr10_60059065_60059830	35	61	52	52
chr10_60290650_60291415	155	163	129	129
chr10_60348443_60349208	14	25	16	16
chr10_60712212_60712977	67	100	94	94
chr10_61381908_61382673	16	20	12	12
chr10_61478915_61479680	14	23	22	22
chr10_61564624_61565389	129	129	81	81
chr10_61590242_61590868	12	19	6	6
chr10_61859724_61860489	101	134	102	102
chr10_62406782_62407547	71	109	50	50
chr10_62723702_62724467	60	59	52	52
chr10_63043857_63044622	50	59	20	20
chr10_63366961_63367580	5	24	8	8
chr10_63510509_63511274	11	24	13	13
chr10_63555034_63555799	21	31	22	22
chr10_63656507_63657272	37	60	33	33
chr10_64004588_64005353	5	16	13	13
chr10_64024319_64025084	12	23	19	19
chr10_64173964_64174729	14	37	12	12
chr10_64197175_64197940	16	47	19	19
chr10_64370211_64370976	31	46	25	25
chr10_64843443_64844208	13	12	14	14
chr10_64917713_64918478	26	50	37	37
chr10_64926361_64927126	35	74	50	50
chr10_64967164_64967929	6	10	15	15
chr10_65479576_65480341	235	258	226	226
chr10_65625981_65626746	169	196	139	139
chr10_65660802_65661567	41	49	41	41
chr10_65736133_65736898	65	96	53	53
chr10_65800755_65801520	108	133	84	84
chr10_65889717_65890482	10	21	18	18
chr10_67565872_67566637	5	3	19	19
chr10_67940284_67941049	202	251	211	211
chr10_68037132_68037751	6	19	9	9
chr10_68690923_68691688	29	55	30	30
chr10_69539476_69540241	125	160	118	118
chr10_69548015_69548780	103	135	77	77
chr10_69615143_69615908	230	298	204	204
chr10_70108027_70108792	52	66	51	51
chr10_70852871_70853636	53	79	46	46
chr10_70981851_70982483	4	10	10	10
chr10_70997119_70997884	105	148	93	93
chr10_71152064_71152829	144	152	111	111
chr10_71209357_71210122	69	97	88	88
chr10_71275205_71275970	76	107	38	38
chr10_71389459_71390324	193	179	173	173
chr10_71398771_71399536	49	78	54	54
chr10_71476546_71477311	45	68	30	30
chr10_71548619_71549384	349	288	284	284
chr10_71644826_71645591	41	63	39	39
chr10_71661197_71661962	23	38	19	19
chr10_71674202_71674967	340	279	251	251
chr10_71717833_71718598	130	157	109	109
chr10_71813391_71814156	32	20	15	15
chr10_71866798_71867563	41	68	50	50
chr10_71875754_71876519	179	205	137	137
chr10_71981072_71981837	156	204	120	120
chr10_72124128_72124758	9	20	12	12
chr10_72139130_72139895	28	31	27	27
chr10_72220942_72221707	16	28	16	16
chr10_72300049_72300814	14	29	12	12
chr10_72309409_72310174	52	115	74	74
chr10_72318887_72319652	25	33	28	28
chr10_72518620_72519385	40	44	21	21
chr10_72575186_72575951	133	139	121	121
chr10_72639611_72640376	54	81	33	33
chr10_72662855_72663620	138	169	92	92
chr10_72685240_72686005	125	150	105	105
chr10_72792937_72793702	22	33	19	19
chr10_72968611_72969376	21	30	17	17
chr10_73029933_73030569	5	19	11	11
chr10_73073833_73074598	14	30	12	12
chr10_73143735_73144500	226	280	221	221
chr10_73189542_73190307	14	24	13	13
chr10_73329570_73330335	153	207	154	154
chr10_73368812_73369441	23	22	11	11
chr10_73456271_73457036	44	67	48	48
chr10_73467748_73468513	59	85	50	50
chr10_73485513_73486278	16	25	13	13
chr10_73532993_73533758	42	46	51	51
chr10_73571504_73572269	25	47	28	28
chr10_73655949_73656714	265	289	271	271
chr10_73715632_73716397	76	91	95	95
chr10_73808085_73808850	211	208	219	219
chr10_74096705_74097470	252	192	185	185
chr10_74099972_74100737	219	214	143	143
chr10_74327487_74328252	21	36	15	15
chr10_74918611_74919376	111	91	83	83
chr10_75288903_75289668	58	119	68	68
chr10_75403720_75404485	38	50	19	19
chr10_75574741_75575506	77	98	73	73
chr10_75608597_75609362	256	301	223	223
chr10_75639227_75639992	86	74	69	69
chr10_75716940_75717705	21	25	12	12
chr10_76859511_76860276	260	268	235	235
chr10_76868195_76868960	113	137	119	119
chr10_76990150_76990915	175	188	156	156
chr10_76995446_76996211	13	23	16	16
chr10_77154847_77155612	116	85	94	94
chr10_77612737_77613356	20	19	8	8
chr10_77795894_77796659	151	161	115	115
chr10_78306917_78307682	53	77	52	52
chr10_78744386_78745151	86	162	98	98
chr10_78764505_78765270	34	38	24	24
chr10_78796887_78797652	111	170	113	113
chr10_78842530_78843150	4	19	7	7
chr10_78871430_78872195	132	195	113	113
chr10_78925314_78926079	41	85	48	48
chr10_78933454_78934219	108	145	103	103
chr10_79151406_79152171	18	30	24	24
chr10_79188334_79189099	18	26	12	12
chr10_79401366_79402131	208	207	174	174
chr10_79471007_79471772	220	193	165	165
chr10_79479128_79479893	97	101	60	60
chr10_79606200_79606965	171	247	163	163
chr10_79806866_79807631	177	238	153	153
chr10_80140645_80141410	15	19	14	14
chr10_80424469_80425234	66	76	45	45
chr10_80955058_80955689	256	284	244	244
chr10_80956418_80957183	248	234	198	198
chr10_80962158_80962777	3	18	2	2
chr10_81052539_81053304	97	97	66	66
chr10_81106756_81107521	82	108	101	101
chr10_81134118_81134883	225	200	197	197
chr10_81160038_81160803	93	113	87	87
chr10_81226958_81227723	54	80	42	42
chr10_81247142_81247907	49	84	64	64
chr10_81296683_81297448	88	126	115	115
chr10_81538850_81539615	100	112	107	107
chr10_81688978_81689743	20	53	23	23
chr10_81806435_81807200	50	87	41	41
chr10_81889878_81890518	15	10	7	7
chr10_81903274_81904039	284	298	290	290
chr10_81928645_81929410	26	49	17	17
chr10_81982205_81982970	39	51	42	42
chr10_82020195_82020960	160	184	140	140
chr10_82204213_82204978	67	65	40	40
chr10_82265118_82265883	227	228	180	180
chr10_82356227_82356992	101	144	114	114
chr10_82358976_82359741	50	115	52	52
chr10_82422215_82422980	352	382	300	300
chr10_82459055_82459820	32	29	12	12
chr10_82683978_82684597	9	16	4	4
chr10_83238938_83239557	12	14	10	10
chr10_83679775_83680540	14	24	19	19
chr10_84571160_84571925	58	90	71	71
chr10_85631061_85631826	193	171	197	197
chr10_85768341_85769106	169	176	159	159
chr10_85786358_85787123	111	135	89	89
chr10_85907589_85908354	47	63	35	35
chr10_85965168_85965933	132	181	79	79
chr10_85974144_85974909	61	116	72	72
chr10_85996879_85997502	7	11	8	8
chr10_86016591_86017356	64	102	54	54
chr10_86024150_86024915	54	75	57	57
chr10_86111815_86112580	41	57	33	33
chr10_86114730_86115309	2	2	6	6
chr10_86189477_86190242	38	83	43	43
chr10_86296974_86297739	116	166	130	130
chr10_86425431_86426196	14	25	14	14
chr10_86475442_86476207	116	154	97	97
chr10_86726376_86726995	13	17	5	5
chr10_87372550_87373315	24	54	37	37
chr10_87869954_87870719	111	116	85	85
chr10_87898609_87899374	31	40	25	25
chr10_87937955_87938720	43	66	42	42
chr10_88136646_88137507	288	265	224	224
chr10_88159326_88160091	41	73	37	37
chr10_88344989_88345754	160	261	182	182
chr10_88447861_88448626	234	252	214	214
chr10_88698975_88699740	114	111	106	106
chr10_88719961_88720726	195	155	153	153
chr10_88908509_88909274	62	68	101	101
chr10_89061025_89061790	93	117	76	76
chr10_89195761_89196380	96	138	72	72
chr10_89293179_89293944	68	118	49	49
chr10_89416022_89416787	65	124	67	67
chr10_89494786_89495551	36	68	52	52
chr10_90078407_90079034	17	27	11	11
chr10_90342716_90343481	21	30	16	16
chr10_90447413_90448178	26	29	19	19
chr10_90488070_90488691	9	21	11	11
chr10_90692277_90692896	31	70	36	36
chr10_90694360_90695125	89	120	101	101
chr10_90722841_90723606	17	8	16	16
chr10_90789379_90790144	196	219	163	163
chr10_90976526_90977291	144	117	122	122
chr10_91019902_91020667	282	391	267	267
chr10_91613379_91614187	5	16	6	6
chr10_91898490_91899112	13	18	8	8
chr10_92639604_92640369	28	37	34	34
chr10_92671126_92671891	209	243	188	188
chr10_92765799_92766564	154	235	184	184
chr10_93011023_93011788	16	32	18	18
chr10_93057786_93058551	130	137	111	111
chr10_93149185_93149950	94	156	142	142
chr10_93453755_93454520	75	92	76	76
chr10_94276564_94277329	26	60	22	22
chr10_94404068_94404833	11	13	12	12
chr10_94598679_94599444	139	139	121	121
chr10_94602656_94603421	224	188	192	192
chr10_94644450_94645215	46	53	46	46
chr10_94674114_94674733	11	27	7	7
[truncated: 13,808 more rows]
