# Supplementary material for: Controlling gene activation by enhancers through a drug-inducible topological insulator
Source: eLife. 2020 May 5;9:e47980. doi: 10.7554/eLife.47980 (PMC7200164; doi:10.7554/eLife.47980)
Supplement: Figure 6—source data 1. [file elife-47980-fig6-data1.xlsx]

## Sheet: Sheet1
Figure 6A - 4C-seq read counts in the intervals
start	127825136	128775680	129187540	127825136
end	128718559	129187539	130742614	130742614
sample	left	30kb-440kb	440kb-right	3Mb(-VP10kb)	time	DOX
VP-MYC2_noDOX0h+	42921	22748	22226	95343	0	"+ to -"
VP-MYC2_noDOX4h	47862	26750	26892	110436	4	"+ to -"
VP-MYC2_noDOX8h	32232	38298	32163	110687	8	"+ to -"
VP-MYC2_noDOX16h	42079	72466	51810	177091	16	"+ to -"
VP-MYC2_noDOX24h	38917	78718	56850	185676	24	"+ to -"
Figure 6B - 4C-seq read counts in the intervals
start	127825136	128775680	129187540	127825136
end	128718559	129187539	130742614	130742614
sample	left	30kb-440kb	440kb-right	3Mb(-VP10kb)	time	DOX
VP-MYC2_DOX0h-	29800	49474	39170	124942	0	"- to +"
VP-MYC2_DOX4h	59328	62419	56726	190152	4	"- to +"
VP-MYC2_DOX8h	52132	33951	33685	129804	8	"- to +"
VP-MYC2_DOX16h	64936	36196	33185	145143	16	"- to +"
VP-MYC2_DOX24h	72782	31875	35899	153046	24	"- to +"
Figure 6F - Enrichment of H3K4me3 at MYC
From DOX minus to DOX plus
Time (hours)	rep1	rep2	rep3
0	1.61291	1.39103	1.35706
8	0.362672	0.40382	0.411812
16	0.215954	0.244503	0.233519
24	0.154108	0.174021	0.211057
48	0.175384	0.137511	0.206835
From DOX plus to DOX minus
Time (hours)	rep1	rep2	rep3
0	0.19284	0.202148	0.213579
8	1.30045	1.02881	1.08709
16	2.19195	1.34328	1.49442
24	1.35731	1.56099	1.54151
48	1.45576	1.4015	1.62978
Figure 6G - Enrichment of H3K27me3 at MYC
From DOX minus to DOX plus
Time (hours)	rep1	rep2	rep3
0	0.282711	0.105686	0.121695
8	0.151634	0.212853	0.250734
16	0.248502	0.355629	0.33523
24	0.467343	0.376634	0.507971
48	0.938043	0.568692	0.59772
From DOX plus to DOX minus
Time (hours)	rep1	rep2	rep3
0	0.741484	0.764199	0.575159
8	0.883472	0.67685	0.959913
16	0.539366	0.950157	0.57719
24	0.456426	0.600645	0.335948
48	0.296121	0.218875	0.140305
