# Supplementary material for: Controlling gene activation by enhancers through a drug-inducible topological insulator
Source: eLife. 2020 May 5;9:e47980. doi: 10.7554/eLife.47980 (PMC7200164; doi:10.7554/eLife.47980)
Supplement: Figure 7—source data 1. [file elife-47980-fig7-data1.xlsx]

## Sheet: Sheet1
Figure 7J -MYC expression levels upon removal of DOX with DMSO or EPZ
DMSO
Time (hours)	rep1	rep2	rep3
0	0.07	0.15	0.06
4	0.24	0.07	0.08
8	0.44	0.47	0.48
16	1.09	0.87	1.04
24	1.12	1.38	1.35
EPZ
Time (hours)	rep1	rep2	rep3
0	0.08	0.09	0.07
4	0.1	0.1	0.1
8	0.42	0.57	0.54
16	1.09	1.07	1.1
24	1.3	1.51	1.36
