# Supplementary material for: Controlling gene activation by enhancers through a drug-inducible topological insulator
Source: eLife. 2020 May 5;9:e47980. doi: 10.7554/eLife.47980 (PMC7200164; doi:10.7554/eLife.47980)
Supplement: Figure 8—figure supplement 2—source code 1. — The R code for the PCA in Figure 8—figure supplement 2C. [file elife-47980-fig8-figsupp2-code1.r]

library(ggplot2)

countTable <- as.data.frame(read.table("4CNGN2count.txt", header = F, row.names = 1))
col4Call <-read.table("4CNGN2color.txt", header = F)
shape4Call<-read.table("4CNGN2shape.txt", header = F)
#ALL_whole
count4C<-countTable
coordinate<-as.numeric(count4C[2,])
count4C<-countTable[c(-1,-2),]
col4C<-col4Call
shape4C<-shape4Call
breaks <- seq(113.2, 113.6, 0.1)
limits<-c(113.12, 113.62)

#Common
#PCA
norm4C<-count4C/rowSums(count4C)
PCA4C <- prcomp(norm4C, scale = TRUE)
#variance
PCAvariance<-(summary(PCA4C))$importance
pc1var<-round(PCAvariance[2,1]*100, 1)
pc2var<-round(PCAvariance[2,2]*100,1)
#PCAplot
dfPCA4C <- as.data.frame(PCA4C$x)
dfPCA4C$Allele <- paste0(sapply( strsplit(as.character(row.names(dfPCA4C)), "_"), "[[", 2 ),
                         "-",sapply( strsplit(as.character(row.names(dfPCA4C)), "_"), "[[", 3 ))
PCAtitle<-paste0("PCA ",round((coordinate[1]/1000000),1),"-",round((rev(coordinate)[1]/1000000),1), "Mb")
pc1 <- paste0("PC1 (", pc1var, "% variance)")
pc2 <- paste0("PC2 (", pc2var, "% variance)")
col<-as.character(col4C$V2)
names(col)<-as.character(dfPCA4C$Allele)
shape<-as.numeric(shape4C$V2)
names(shape)<-as.character(dfPCA4C$Allele)
PCAlim<-ceiling(max(abs(dfPCA4C$PC1), abs((dfPCA4C$PC2))))
PCAplot<-ggplot(dfPCA4C,aes(x=PC2,y=PC1, color=Allele, shape=Allele ))+
  labs(title=PCAtitle, x =pc2, y = pc1)+
  geom_point(size=2, stroke=2)+
  scale_shape_manual(values = shape)+
  scale_color_manual(values=col)+
  ylim(-PCAlim,PCAlim)+
  xlim(-PCAlim,PCAlim)+
  theme(plot.title = element_text(size=12, hjust=0.5, face="bold"),
        legend.text = element_text(size=11),
        legend.title = element_text(size=12),
        legend.position = "left",
        axis.text.x = element_text(size=10, angle=0),
        axis.text.y = element_text(size=10, angle=90),
        axis.title.x = element_text(size=12, face="bold"),
        axis.title.y = element_text(size=12, face="bold"),
        axis.line.x = element_line(linetype = "solid", size=1, color="black"),
        axis.line.y = element_line(linetype = "solid", size=1, color="black")
  )
PCAplot
#Component Loading
CL4C <- sweep(PCA4C$rotation, MARGIN=2, PCA4C$sdev, FUN="*")
CL4C<- as.data.frame(cbind(CL4C, coordinate))
CLplot1<-ggplot(CL4C, aes(y=PC1, x=coordinate/1000000))+
  labs(title="PC1", x ="Chr4", y = "Component Loading")+
  geom_point(shape=21, size=1.5, fill="black")+
  scale_x_continuous(breaks = breaks, limits=limits)+
  theme(plot.title = element_text(size=12, hjust=0.5, face="bold"),
        axis.text.x = element_text(size=10, angle=0, hjust=0.5),
        axis.text.y = element_text(size=12, angle=0),
        axis.title.x = element_text(size=12, face="bold"),
        axis.title.y = element_text(size=12, face="bold"),
        legend.position='none',
        axis.line.x = element_line(linetype = "solid", size=1, color="black"),
        axis.line.y = element_line(linetype = "solid", size=1, color="black")
  )
CLplot1
CLplot2<-ggplot(CL4C, aes(y=PC2, x=coordinate/1000000))+
  labs(title="PC2", x ="Chr4", y = "Component Loading")+
  geom_point(shape=21, size=1.5, fill="black")+
  scale_x_continuous(breaks = breaks, limits=limits)+
  theme(plot.title = element_text(size=12, hjust=0.5, face="bold"),
        axis.text.x = element_text(size=10, angle=0, hjust=0.5),
        axis.text.y = element_text(size=12, angle=0),
        axis.title.x = element_text(size=12, face="bold"),
        axis.title.y = element_text(size=12, face="bold"),
        legend.position='none',
        axis.line.x = element_line(linetype = "solid", size=1, color="black"),
        axis.line.y = element_line(linetype = "solid", size=1, color="black")
  )
CLplot2
