# Supplementary material for: Controlling gene activation by enhancers through a drug-inducible topological insulator
Source: eLife. 2020 May 5;9:e47980. doi: 10.7554/eLife.47980 (PMC7200164; doi:10.7554/eLife.47980)
Supplement: Figure 8—source data 1. [file elife-47980-fig8-data1.xlsx]

## Sheet: Sheet1
Figure 8C, Figure8-figure supplement 1B -Relative gene expression levels in differentiating NPCs
Days	DOX	Replicates	NEUROG2	PAX6	NANOG	tetR
0	minus	rep1	0.731745	0.79505	1.11681	1.06284
0	minus	rep2	1.02025	1.02821	0.860696	0.774044
0	minus	rep3	1.34716	0.714354	1.2305	1.00922
0	plus	rep1	1.39583	1.52602	0.824476	0.911997
0	plus	rep2	0.790444	1.13368	1.00679	1.01031
0	plus	rep3	0.71457	0.802694	0.960728	1.23159
2	minus	rep1	1.79109	26.6269	0.0106227	0.776695
2	minus	rep2	2.0566	22.922	0.00924919	0.612545
2	minus	rep3	3.007	23.0037	0.0118472	1.1189
2	minus	rep4	1.73663	24.6715	0.0109652	0.899304
2	plus	rep1	2.33473	20.9447	0.0111175	0.769843
2	plus	rep2	4.63878	29.552	0.0119726	0.809217
2	plus	rep3	2.25588	26.1347	0.0106612	0.721233
2	plus	rep4	2.08681	14.8065	0.0106077	0.81413
4	minus	rep1	22.5438	1959.24	0.0138111	0.388949
4	minus	rep2	8.4245	2119.06	0.00650063	0.334194
4	minus	rep3	21.8344	2318.88	0.0118422	0.564714
4	minus	rep4	21.4364	2258.2	0.0164082	0.541678
4	plus	rep1	16.4801	2340.38	0.0120484	0.337575
4	plus	rep2	5.79731	2683.1	0.00202623	0.498202
4	plus	rep3	5.54791	3148.87	0.00203883	0.464919
4	plus	rep4	8.89715	2135.42	0.0031991	0.366266
6	minus	rep1	50.0162	4042.93	0.00928613	0.267228
6	minus	rep2	94.2795	4190.71	0.00653542	0.368835
6	minus	rep3	69.3085	4256.34	0.00983806	0.267417
6	minus	rep4	45.0304	2753.17	0.00161815	0.186864
6	plus	rep1	52.5554	9030.98	0.00661966	0.294448
6	plus	rep2	61.3009	5234.15	0.017074	0.343686
6	plus	rep3	45.6314	3881.12	0.00434536	0.318354
6	plus	rep4	32.691	4994.03	0.00936606	0.290592
Figure 8F -4C-seq read counts in the intervals
	chr4	chr4	chr4	chr4
start	113120000	113218499	113371316	113448342
end	113218498	113371315	113426256	113620000
sample	Left-ALPK1	ALPK1-STITCH	STITCH-NEUROG2	NEUROG2-Right
VP-NEUROG2_iPS-DOX	6450	26617	14621	16987
VP-NEUROG2_iPS-noDOX	9525	41244	16834	20122
VP-NEUROG2_LSB-DOX	7254	21028	10761	15568
VP-NEUROG2_LSB-noDOX	5986	18290	6935	11802
Fiugre 8-fugure supplement 2E-G -4C-seq read counts in the intervals
	chr4	chr4	chr4	chr4
start	113172650	113272650	113381316	113471316
end	113272649	113362649	113471315	113571315
sample	Left200-100kb	Left100kb	Right100kb	Right100-200kb
VP-R3_NlaIII-DOX	39969	28400	50274	29612
VP-R3_NlaIII-noDOX	15435	35054	48431	10005
VP-R3_DpnII-DOX	30814	21819	30840	22618
VP-R3_DpnII-noDOX	13313	26684	34908	8650
