# Supplementary material for: Controlling gene activation by enhancers through a drug-inducible topological insulator
Source: eLife. 2020 May 5;9:e47980. doi: 10.7554/eLife.47980 (PMC7200164; doi:10.7554/eLife.47980)
Supplement: Supplementary file 1. — (A) List of guide RNAs for CRISPR genome editing used in the study. (B) The DNA sequences of the elements composing STITCH. (C) List of primers used to prepare the targeting cassettes. (D) List of primers used for the genotyping. (E) List of primers used in the qPCR assays. (F) List of primers used for the 4C 1st PCR. (G) List of primers used to prepare the NGS libraries. (H) List of the NGS libraries. [file elife-47980-supp1.xlsx]

## Sheet: (A) Guide RNA
CRISPR target ID	Target gRNA	PAM	Position (hg19)	Remarks
1	ATTTAGGACAAACTGTACTA	TGG	chr8 127825130 127825149 (-)	3Mb(L)
2	GATCTTGAAACTGTTATGCA	AGG	chr8 130742581 130742600 (+)	3Mb(R)
3	GTCCCAGAGTTTGACAACCA	GGG	chr8 128775670 128775689 (-)	MYC+30kb
4	CAAATATAGTAACCCAAGAG	AGG	chr8 128718557 128718576 (-)	MYC-30kb
5	ACAAGTCACTTCTTCGTCAT	GGG	chr8 129187537 129187556 (-)	MYC+440kb
6	AATTGCAGAGGGTCAAACCA	CGG	chr8 130512696 130512715 (-)	MYC+1760kb
7	GGTGGAATGACTGACTACCC	AGG	chr8 130542194 130542213 (-)	MYC+1790kb
8	ATTCACATCTTGGAATGGGA	TGG	NA	STITCH-L1(L)
9	TGGCTGTGCAGCCTCCTGCT	TGG	NA	STITCH-L4(R)
10	TAAGAGGGACCACACCCGAG	CGG	NA	STITCH-R1(L)
11	CTGAGCCCAACAGGACACAT	GGG	NA	STITCH-R3(R)
12	CCTCAGACTATACAAACCAG	TGG	NA	STITCH-L2(L)
13	ACCTTGGGCTGTTAGCACTA	GGG	NA	STITCH-R2(R)
14	GGATGTTGAGCCAAGTATTA	AGG	chr4 113371299 113371318 (+)	NEUROG2-65kb

## Sheet: (B) STITCH elements
Name	Sequence	Length	mouse genome (mm9)	CTCF core	core orientation
tetO	ACTCCCTATCAGTGATAGAGAAC	23	NA	NA	NA
L1	GACCCAGCAAAGCCATCCCATTCCAAGATGTGAATGGACCTTGGAGCCACTCCCCACCCCCACCACTCCCAAGCACAGCCATTCAGTGCCTCTCCCTGGGCAGGGGAACGCTGCCCTCTTCTGGTCCAAGCGGACAGGCACGGCCAAGGCCAGCCTCCAGCACTTCATGAGCCGCCTGC	179	chr2:172584097-172584275	ACGCTGCCCTCTTCTGGTCC	minus
L2	CACTGGTTTGTATAGTCTGAGGGTCATGCCAACCCTCTGCCTCTCAAGTCCTTTTAAGGAAAACGACAGGGCACCTTTCTGTGCGCCACCTGGTGGCAAGAATTGTCATTACACCAGCCAGGAGATTCTCCTGCCCCAGAACAGACCATTGACCTGTCCTGAGGGAGGGTGGCTCTTCC	179	chr2:172,598,768-172,598,946	TGTGCGCCACCTGGTGGCAA	minus
L3	GACTTGCTTGCTGTTCTCGTTGATAACAAGAACAATTGGGCTCAATTCCAAACTTCTATTAGGCACCTCCCAAGCACCATTAAGCTCCAGTTTCAGGGCCTCTGGTGCCCTCTTCTGGCCTGCACATGCACTGCACATGTATGGCACACATACAAACAAGTATACACACACTTTTTTT	178	chr2:172,603,375-172,603,552	CTGGTGCCCTCTTCTGGCCT	minus
L4	ACGCAAGGCGGTTAAAGCCTAGCCAGGTAGACGCCACAGAATTCCGTGCAAGTTCCAGCAGCTGGAGGCCCCGCTGGGATGGATGCGCGCTACTGCGGCCCCCTCTGCTGGCAGCCTCAAGGCTGCGCCTTCCGGGGAGGTGGCCAAGCAGGAGGCTGCACAGCCAAGCCCTCAGACCG	179	chr2:172,650,779-172,650,957	GCGGCCCCCTCTGCTGGCAG	minus
tetO	ACTCCCTATCAGTGATAGAGAAC	23	NA	NA	NA
LoxP	ATAACTTCGTATAATGTATGCTATACGAAGTTAT	34	NA	NA	NA
PGK-Puro	CTCGAAATTCTACCGGGTAGGGGAGGCGCTTTTCCCAAGGCAGTCTGGAGCATGCGCTTTAGCAGCCCCGCTGGGCACTTGGCGCTACACAAGTGGCCTCTGGCCTCGCACACATTCCACATCCACCGGTAGGCGCCAACCGGCTCCGTTCTTTGGTGGCCCCTTCGCGCCACCTTCTACTCCTCCCCTAGTCAGGAAGTTCCCCCCCGCCCCGCAGCTCGCGTCGTGCAGGACGTGACAAATGGAAGTAGCACGTCTCACTAGTCTCGTGCAGATGGACAGCACCGCTGAGCAATGGAAGCGGGTAGGCCTTTGGGGCAGCGGCCAATAGCAGCTTTGCTCCTTCGCTTTCTGGGCTCAGAGGCTGGGAAGGGGTGGGTCCGGGGGCGGGCTCAGGGG…	1273	NA	NA	NA
LoxP	ATAACTTCGTATAATGTATGCTATACGAAGTTAT	34	NA	NA	NA
tetO	ACTCCCTATCAGTGATAGAGAAC	23	NA	NA	NA
R1	TTCCCATTAAGAGGGACCACACCCGAGCGGCTGAGTGTTTTGGCTTGAATGTGGCAGGAGCACCCTCCCCACTCAGGCTCCTCCTGTGTTAGAACACTTGGACCCCAGCAGGGGGCAGTGTTGGAAGGTTGTAGAACCTTCACAGCGGAGGCCGTGGGTAGCCTTCATTAGTGCCAAGA	179	chr2:172,653,102-172,653,280	ACCCCAGCAGGGGGCAGTGT	plus
R2	AGGCCACCCCAGTGTGGGGAGCACAAGGCCTGCCATGCTGAGGAAGGAAAACAGCCTAGCAGCCAAGAGTGCTGCTGCAGCATCCGTTCATCCAGCAGAGGGCAGCAGAGAGCAGAAGTTGCCTCAGGGAGGAACCTTGGGCTGTTAGCACTAGGGGTTGTTGGACACTGTCCCCTCTC	179	chr2:172,656,682-172,656,860	CATCCAGCAGAGGGCAGCAG	plus
R3	AGGGACAGAATGTTTGACGTGCAGAGGGGCTACTCAGCCCTCTGCAGCTCCTGTTGGCTGTCATCATTCTGGGCCTGCGGGGCAGGAAAACTCAACCACCAGCAGGGGGCGCCTGTGACCTTTGACTTCACTGTGCAGTCCTGAGCCCAACAGGACACATGGGTTTGCTTGCTCTCTTG	179	chr2:172,657,360-172,657,538	CCACCAGCAGGGGGCGCCTG	plus
tetO	ACTCCCTATCAGTGATAGAGAAC	23	NA	NA	NA

## Sheet: (C) Primers for targeting
mutation	Primer 1	Primer 2
STITCH+30kb	AAAATAAAGTTGTATGGGAAAAGC	GAAACAAAGTTTAATTACCATTGAC
STITCH-30kb	AAAGTCTGTATTTCCCTGTAGCTCTGTGAGATAAGCCTTCCATACCTCTCACCCCAGATATCAGCCTCCA	CTAGTTCTTTCATTCCATATCTCAGGAATCCTTCAAATATAGTAACCCAACACTGCACCAGTCCCAGAGT
STITCH+440kb	CATAGCCATAGCTTTAAGTATAATCTTGGGTTCAGCTCTTTTGTCCCATGACCCCAGATATCAGCCTCCA	TACAATCTGATAACTCTCATTATGTAACATCAGACAAGTCACTTCTTCGTCACTGCACCAGTCCCAGAGT
STITCH+1760kb	ACTGCTTCCCCTGGGAATGGGTCCAGGGATGGTGATGCATTTTACCGTGGACCCCAGATATCAGCCTCCA	ATTTCAGCAGTAACCAAATATCCAAATACAGACAATTGCAGAGGGTCAAACACTGCACCAGTCCCAGAGT
STITCH+1790kb	TGAAGAATAATTTTATTTAAAGAGTCTCATTGCGTTTGTCTGCACCTGGGACCCCAGATATCAGCCTCCA	AGTGATTAAGAGAGAATTATCAGAGTGAAGCTGGGTGGAATGACTGACTACACTGCACCAGTCCCAGAGT
LoxP-Puro+440kb_1st (used as template for 2nd PCR)	AAGACCTGGTAAGAGATTGGTCAAGAAGAGAATCTTTGCTATCACCCTATTCACAGCCAAGCCCTCAGAC	TACAATCTGATAACTCTCATTATGTAACATCAGACAAGTCACTTCTTCGTGGTGTGGTCCCTCTTAATGG
LoxP-Puro+440kb_2nd (used for targeting)	TCATAGCCATAGCTTTAAGTATAATCTTGGGTTCAGCTCTTTTGTCCCATGCACAGCCAAGCCCTCAGAC	AATGTAGTGTCATAGATATCAGCAGCCTTAGTTCTCCTTTACAATCTGATAACTCTCATTATGTAACATC
STITCH/NEUROG2	CTGCCAAAGGCATCTGAAAATGTCAAAGTCCTAGGATGTTGAGCCAAGTAACCCCAGATATCAGCCTCCA	TAGTGGAGCTCTCTCTAATATCCAGCTCCTTCTCAGATCATCTTCCTTAACACTGCACCAGTCCCAGAGT

## Sheet: (D) Genotyping primers
mutation	Primer 1	Primer 2	Primer 3	Expected sizes of positives	Expected sizes of negatives	ID
Hap (3Mb del)	GCACTGAAAGTAATGGTCTGGTC	CGCATATTTCTTCCAACTGTGTTA		442vp	none	321, 324
STITCH+30kb	AAGTTGCAGTGAGGCAAGGT	CCAAGGTCCATTCACATCTTG		295bp	none	327, 329
STITCH+30kb	TCAGGCACAATTCCGTATAGC	GCCTGTGACCTTTGACTTCAC		398bp	none	328, 330
STITCH+30kb	AAGTTGCAGTGAGGCAAGGT	TCAGGCACAATTCCGTATAGC		3219bp w/ Puro, 1912bp w/o Puro	534bp	327, 328
STITCH-30kb	ACTTAAACCTGGGAGGGGAAT	CCAAGGTCCATTCACATCTTG		363bp	none	455, 329
STITCH-30kb	AAATACACATCGCCTTTGCAC	GCCTGTGACCTTTGACTTCAC		310bp	none	456, 330
STITCH-30kb	ACTTAAACCTGGGAGGGGAAT	AAATACACATCGCCTTTGCAC		3199bp w/ Puro, 1892bp w/o Puro	458bp	455, 456
STITCH+440kb	CCACGAAGGAGAATTTGACAC	CCAAGGTCCATTCACATCTTG		300bp	none	457, 329
STITCH+440kb	AGACAGCCAACTGAGGGAGAC	GCCTGTGACCTTTGACTTCAC		402bp	none	458, 330
STITCH+440kb	CCACGAAGGAGAATTTGACAC	AGACAGCCAACTGAGGGAGAC		3228bp w/ Puro, 1921bp w/o Puro	487bp	457, 458
STITCH+1760kb	CAGAGTGTGCCACTAACAGGA	CCAAGGTCCATTCACATCTTG		325bp	none	459, 329
STITCH+1760kb	TTCCATCCAGAGAGTGTGGAG	GCCTGTGACCTTTGACTTCAC		388bp	none	460, 330
STITCH+1760kb	CAGAGTGTGCCACTAACAGGA	TTCCATCCAGAGAGTGTGGAG		3239bp w/ Puro, 1932bp w/o Puro	498bp	459, 460
STITCH+1790kb	TGGTGTTCAGTTTCACCATCA	CCAAGGTCCATTCACATCTTG		581bp	none	461, 329
STITCH+1790kb	CATGAGGATCTTGCAGCTTTT	GCCTGTGACCTTTGACTTCAC		466bp	none	462, 330
STITCH+1790kb	TGGTGTTCAGTTTCACCATCA	CATGAGGATCTTGCAGCTTTT		3068bp w/ Puro, 1761bp w/o Puro	327bp	461, 462
STITCH/NEUROG2	CCAAGGTCCATTCACATCTTG	AAATATGCCATGTGCCAAGAC		192bp	none	329, 463
STITCH/NEUROG2	AAAACAGCCTAGCAGCCAAG	CTCCTCCCCTCTCATAACCAA		655bp	none	417, 464
STITCH/NEUROG2	AAATATGCCATGTGCCAAGAC	CTCCTCCCCTCTCATAACCAA		3131bp w/ Puro, 1824bp w/o Puro	390bp	463, 464
STITCH/NEUROG2/cre	TGGTCCCTCTTAATGGGAAGT	AAATATGCCATGTGCCAAGAC		962bp w/o Puro	none	334, 463
STITCH/NEUROG2/cre	CTCCTCCCCTCTCATAACCAA	GATGGATGCGCGCTACTG		1063bp w/o Puro	none	464, 467
STITCH/cre	ACAGACCATTGACCTGTCCTG	TGGTCCCTCTTAATGGGAAGT	GCAGCAGAGAGAGCTGGTGTA	495bp	349bp	333, 334, 335
LoxP-Puro+440kb	AGACAGCCAACTGAGGGAGAC	GCAGCAGAGAGAGCTGGTGTA		642bp	none	458, 335
LoxP-Puro+440kb	CCACGAAGGAGAATTTGACAC	AGACAGCCAACTGAGGGAGAC		1919bp	487bp	457, 458
del(30-440)	AAGTTGCAGTGAGGCAAGGT	AGACAGCCAACTGAGGGAGAC		ca 650bp	none	327, 458
delL	AAGTTGCAGTGAGGCAAGGT	TGGTCCCTCTTAATGGGAAGT		ca 400bp	1065bp	327, 334
delL	AGAATTCCGTGCAAGTTCCAG	TGGTCCCTCTTAATGGGAAGT		none	241bp	349, 334
delR	AGAATTCCGTGCAAGTTCCAG	TCAGGCACAATTCCGTATAGC		ca 630bp	1088bp	349, 328
delR	GCCTGTGACCTTTGACTTCAC	TCAGGCACAATTCCGTATAGC		none	398bp	330, 328
invR	GACAGTGTCCAACAACCCCTA	TCAGGCACAATTCCGTATAGC		ca 650bp	none	310, 328
invR	AGAATTCCGTGCAAGTTCCAG	GCCTGTGACCTTTGACTTCAC		ca 300bp	none	349, 330
invR	AAGTTGCAGTGAGGCAAGGT	TCAGGCACAATTCCGTATAGC		ca 1900bp	1912bp	327, 328
del(L2-R2)	AAGTTGCAGTGAGGCAAGGT	TCAGGCACAATTCCGTATAGC		ca 1000bp	1912bp	327, 328
del(L1-R2)	AAGTTGCAGTGAGGCAAGGT	TCAGGCACAATTCCGTATAGC		752bp	1912bp	327, 328
del(L1-R3)	AAGTTGCAGTGAGGCAAGGT	TCAGGCACAATTCCGTATAGC		ca 630bp	1912bp	327, 328
inv(L1-R3)	AAGTTGCAGTGAGGCAAGGT	TCAGGCACAATTCCGTATAGC		ca 1900bp	1912bp	327, 328
inv(L1-R3)	AAGTTGCAGTGAGGCAAGGT	GCCTGTGACCTTTGACTTCAC		ca 300bp	none	327, 330
inv(L1-R3)	TCAGGCACAATTCCGTATAGC	CCAAGGTCCATTCACATCTTG		ca 300bp	none	328, 329

## Sheet: (E) Primers for qPCR
Target	FWD	REV	Type
MYC	GAGGCTATTCTGCCCATTTG	AGCTAACGTTGAGGGGCATC	cDNA
ACTB	AGCAAGCAGGAGTATGACGAG	CTGCGCAAGTTAGGTTTTGTC	cDNA
NEUROG2	TGGGTATCCTTCATTCAGACG	ATGCCACCATCATCTCTTCC	cDNA
PAX6	ACCACACCGGTTTCCTCCTTCACA	TTGCCATGGTGAAGCTGGGCAT	cDNA
NANOG	CATGAGTGTGGATCCAGCTTG	CCTGAATAAGCAGATCCATGG	cDNA
PURO	ACTATCCTGCCACAAGACACAC	CATACCTTCCCTATGTCCAAGC	cDNA
tetR	TGGCACGTGAAGAACAAGAG	GCAGAAAATCTTGCCAGCTC	cDNA
MYC_K27me3	GCACCAAGACCCCTTTAACTC	GCAGTAGAAATACGGCTGCAC	ChIP
MYC_K4me3	TTCGGGTAGTGGAAAACCAG	GCAGGAATGGGAGAAAAGAC	ChIP
ACTB_K4me3	GCTCAGCTAGCTAAATGTGCTG	TACCTCTCAAGCCCAGGTCTC	ChIP
T_K27me3	AGGATTGGTGGCACTGAAAG	GAGACACTTTCTTGGGATCCAG	ChIP
DPPA4_K4me3	TGTTCCCAATGTCTGGCTTC	ATGAATTCGTCCCCTTTTCC	ChIP
HOXD13_K27me3	AATGCACCTCCTTTTCTTGG	GCCTCTTTTTGAGGATTGAGG	ChIP
STITCH_L2	GACAGGGCACCTTTCTGTG	GAATCTCCTGGCTGGTGTAATG	ChIP
RAE1_CTCF	TTAGGTCTGGCCAGCAGATG	CACAGAAACACATGCTCCAATG	ChIP

## Sheet: (F) Primers for 4C 1st PCR
Viewpoint	FWD	REV
VP-MYC1	TCTTTCCCTACACGACGCTCTTCCGATCTGTAGGCGCGCGTAGTTAATTC	GTGACTGGAGTTCAGACGTGTGCTCTTCCGATCTTCGCTAAGGCTGGGGAAAG
VP-MYC2	TCTTTCCCTACACGACGCTCTTCCGATCTTCTCCCTGGGACTCTTGAT	GTGACTGGAGTTCAGACGTGTGCTCTTCCGATCTAAACTCCCATTGCATTTGTTG
VP-STITCH-left	TCTTTCCCTACACGACGCTCTTCCGATCTCACTCTACTTCTGGCTGATTCTTC	GTGACTGGAGTTCAGACGTGTGCTCTTCCGATCTTGGGACAGGACTTAAGGTGA
VP-STITCH-right	TCTTTCCCTACACGACGCTCTTCCGATCTTTAGCTGGGCCTGGTGGT	GTGACTGGAGTTCAGACGTGTGCTCTTCCGATCTGGAGCGCAGAGGTGTGAT
VP-NEUROG2	TCTTTCCCTACACGACGCTCTTCCGATCTAACAACCGCGAGCGAAAC	GTGACTGGAGTTCAGACGTGTGCTCTTCCGATCTGATGACAGCGGGGTCAGG
VP-R3(NEUROG2)	TCTTTCCCTACACGACGCTCTTCCGATCTCTGGGACTGGTGCAGTGTTA	GTGACTGGAGTTCAGACGTGTGCTCTTCCGATCTGGGAGTCAAGAGAGCAAGCA

## Sheet: (G) Primers for NGS
Primer #	Sequence	Source
N701	CAAGCAGAAGACGGCATACGAGATTCGCCTTAGTGACTGGAGTTCAGACGTGTGCTCTTC	Eurofins Genomics (custom), Tsujimura et al. (2018) Epigenetics Chromatin
N702	CAAGCAGAAGACGGCATACGAGATCTAGTACGGTGACTGGAGTTCAGACGTGTGCTCTTC	Eurofins Genomics (custom), Tsujimura et al. (2018) Epigenetics Chromatin
N703	CAAGCAGAAGACGGCATACGAGATTTCTGCCTGTGACTGGAGTTCAGACGTGTGCTCTTC	Eurofins Genomics (custom), Tsujimura et al. (2018) Epigenetics Chromatin
N704	CAAGCAGAAGACGGCATACGAGATGCTCAGGAGTGACTGGAGTTCAGACGTGTGCTCTTC	Eurofins Genomics (custom), Tsujimura et al. (2018) Epigenetics Chromatin
N705	CAAGCAGAAGACGGCATACGAGATAGGAGTCCGTGACTGGAGTTCAGACGTGTGCTCTTC	Eurofins Genomics (custom), Tsujimura et al. (2018) Epigenetics Chromatin
N706	CAAGCAGAAGACGGCATACGAGATCATGCCTAGTGACTGGAGTTCAGACGTGTGCTCTTC	Eurofins Genomics (custom), Tsujimura et al. (2018) Epigenetics Chromatin
N707	CAAGCAGAAGACGGCATACGAGATGTAGAGAGGTGACTGGAGTTCAGACGTGTGCTCTTC	Eurofins Genomics (custom), Tsujimura et al. (2018) Epigenetics Chromatin
N708	CAAGCAGAAGACGGCATACGAGATCCTCTCTGGTGACTGGAGTTCAGACGTGTGCTCTTC	Eurofins Genomics (custom), Tsujimura et al. (2018) Epigenetics Chromatin
N709	CAAGCAGAAGACGGCATACGAGATAGCGTAGCGTGACTGGAGTTCAGACGTGTGCTCTTC	Eurofins Genomics (custom), Tsujimura et al. (2018) Epigenetics Chromatin
N710	CAAGCAGAAGACGGCATACGAGATCAGCCTCGGTGACTGGAGTTCAGACGTGTGCTCTTC	Eurofins Genomics (custom), Tsujimura et al. (2018) Epigenetics Chromatin
N711	CAAGCAGAAGACGGCATACGAGATTGCCTCTTGTGACTGGAGTTCAGACGTGTGCTCTTC	Eurofins Genomics (custom), Tsujimura et al. (2018) Epigenetics Chromatin
N712	CAAGCAGAAGACGGCATACGAGATTCCTCTACGTGACTGGAGTTCAGACGTGTGCTCTTC	Eurofins Genomics (custom), Tsujimura et al. (2018) Epigenetics Chromatin
S501	AATGATACGGCGACCACCGAGATCTACACTAGATCGCACACTCTTTCCCTACACGACGCTCTTCCGATCT	Eurofins Genomics (custom), Tsujimura et al. (2018) Epigenetics Chromatin
S502	AATGATACGGCGACCACCGAGATCTACACCTCTCTATACACTCTTTCCCTACACGACGCTCTTCCGATCT	Eurofins Genomics (custom), Tsujimura et al. (2018) Epigenetics Chromatin
S503	AATGATACGGCGACCACCGAGATCTACACTATCCTCTACACTCTTTCCCTACACGACGCTCTTCCGATCT	Eurofins Genomics (custom), Tsujimura et al. (2018) Epigenetics Chromatin
S504	AATGATACGGCGACCACCGAGATCTACACAGAGTAGAACACTCTTTCCCTACACGACGCTCTTCCGATCT	Eurofins Genomics (custom), Tsujimura et al. (2018) Epigenetics Chromatin
S505	AATGATACGGCGACCACCGAGATCTACACGTAAGGAGACACTCTTTCCCTACACGACGCTCTTCCGATCT	Eurofins Genomics (custom), Tsujimura et al. (2018) Epigenetics Chromatin
S506	AATGATACGGCGACCACCGAGATCTACACACTGCATAACACTCTTTCCCTACACGACGCTCTTCCGATCT	Eurofins Genomics (custom), Tsujimura et al. (2018) Epigenetics Chromatin
S507	AATGATACGGCGACCACCGAGATCTACACAAGGAGTAACACTCTTTCCCTACACGACGCTCTTCCGATCT	Eurofins Genomics (custom), Tsujimura et al. (2018) Epigenetics Chromatin
S508	AATGATACGGCGACCACCGAGATCTACACCTAAGCCTACACTCTTTCCCTACACGACGCTCTTCCGATCT	Eurofins Genomics (custom), Tsujimura et al. (2018) Epigenetics Chromatin
S510	AATGATACGGCGACCACCGAGATCTACACCGTCTAATACACTCTTTCCCTACACGACGCTCTTCCGATCT	Eurofins Genomics (custom), Tsujimura et al. (2018) Epigenetics Chromatin
S511	AATGATACGGCGACCACCGAGATCTACACTCTCTCCGACACTCTTTCCCTACACGACGCTCTTCCGATCT	Eurofins Genomics (custom), Tsujimura et al. (2018) Epigenetics Chromatin
S513	AATGATACGGCGACCACCGAGATCTACACTCGACTAGACACTCTTTCCCTACACGACGCTCTTCCGATCT	Eurofins Genomics (custom), Tsujimura et al. (2018) Epigenetics Chromatin
S517	AATGATACGGCGACCACCGAGATCTACACGCGTAAGAACACTCTTTCCCTACACGACGCTCTTCCGATCT	Eurofins Genomics (custom), Tsujimura et al. (2018) Epigenetics Chromatin
S518	AATGATACGGCGACCACCGAGATCTACACCTATTAAGACACTCTTTCCCTACACGACGCTCTTCCGATCT	Eurofins Genomics (custom), Tsujimura et al. (2018) Epigenetics Chromatin
S520	AATGATACGGCGACCACCGAGATCTACACAAGGCTATACACTCTTTCCCTACACGACGCTCTTCCGATCT	Eurofins Genomics (custom), Tsujimura et al. (2018) Epigenetics Chromatin
NEB1	CAAGCAGAAGACGGCATACGAGATCGTGATGTGACTGGAGTTCAGACGTGTGCTCTTCCGATC-s-T	NEB #E7335S
NEB2	CAAGCAGAAGACGGCATACGAGATACATCGGTGACTGGAGTTCAGACGTGTGCTCTTCCGATC-s-T	NEB #E7335S
NEB3	CAAGCAGAAGACGGCATACGAGATGCCTAAGTGACTGGAGTTCAGACGTGTGCTCTTCCGATC-s-T	NEB #E7335S
NEB4	CAAGCAGAAGACGGCATACGAGATTGGTCAGTGACTGGAGTTCAGACGTGTGCTCTTCCGATC-s-T	NEB #E7335S
NEB5	CAAGCAGAAGACGGCATACGAGATCACTGTGTGACTGGAGTTCAGACGTGTGCTCTTCCGATC-s-T	NEB #E7335S
NEB6	CAAGCAGAAGACGGCATACGAGATATTGGCGTGACTGGAGTTCAGACGTGTGCTCTTCCGATC-s-T	NEB #E7335S
NEB7	CAAGCAGAAGACGGCATACGAGATGATCTGGTGACTGGAGTTCAGACGTGTGCTCTTCCGATC-s-T	NEB #E7335S
NEB8	CAAGCAGAAGACGGCATACGAGATTCAAGTGTGACTGGAGTTCAGACGTGTGCTCTTCCGATC-s-T	NEB #E7335S
NEB9	CAAGCAGAAGACGGCATACGAGATCTGATCGTGACTGGAGTTCAGACGTGTGCTCTTCCGATC-s-T	NEB #E7335S
NEB10	CAAGCAGAAGACGGCATACGAGATAAGCTAGTGACTGGAGTTCAGACGTGTGCTCTTCCGATC-s-T	NEB #E7335S
NEB11	CAAGCAGAAGACGGCATACGAGATGTAGCCGTGACTGGAGTTCAGACGTGTGCTCTTCCGATC-s-T	NEB #E7335S
NEB12	CAAGCAGAAGACGGCATACGAGATTACAAGGTGACTGGAGTTCAGACGTGTGCTCTTCCGATC-s-T	NEB #E7335S

## Sheet: (H) List of NGS libraries
Name	Library_type	Antibody/VP	Cells	replicate	index combi
VP-MYC1_del30-440_1	4C	VP-MYC1	del(30-440)	1	N711-S517_AAGAGGCA-GCGTAAGA
VP-MYC1_del30-440_2	4C	VP-MYC1	del(30-440)	2	N712-S518_GTAGAGGA-CTATTAAG
VP-MYC1_delL_1	4C	VP-MYC1	delL	1	N710-S506_CGAGGCTG-ACTGCATA
VP-MYC1_delL1-R2_1	4C	VP-MYC1	del(L1-R2)	1	N706-S520_TAGGCATG-AAGGCTAT
VP-MYC1_delL1-R3_1	4C	VP-MYC1	del(L1-R3)	1	N703-S513_AGGCAGAA-TCGACTAG
VP-MYC1_delL2-R2_1	4C	VP-MYC1	del(L2-R2)	1	N701-S510_TAAGGCGA-CGTCTAAT
VP-MYC1_delR_1	4C	VP-MYC1	delR	1	N711-S507_AAGAGGCA-AAGGAGTA
VP-MYC1_DOX_1	4C	VP-MYC1	DOX	1	N704-S517_TCCTGAGC-GCGTAAGA
VP-MYC1_Hap_1	4C	VP-MYC1	Hap	1	N707-S503_CTCTCTAC-TATCCTCT
VP-MYC1_invL1-R3_1	4C	VP-MYC1	inv(L1-R3)	1	N702-S511_CGTACTAG-TCTCTCCG
VP-MYC1_invR_1	4C	VP-MYC1	invR	1	N712-S508_GTAGAGGA-CTAAGCCT
VP-MYC1_noDOX_1	4C	VP-MYC1	noDOX	1	N705-S518_GGACTCCT-CTATTAAG
VP-MYC1_STITCH-30kb_1	4C	VP-MYC1	STITCH-30kb	1	N707-S501_CTCTCTAC-TAGATCGC
VP-MYC1_STITCH+30kb_1	4C	VP-MYC1	STITCH+30kb	1	N708-S504_CAGAGAGG-AGAGTAGA
VP-MYC1_STITCH+30kb_2	4C	VP-MYC1	STITCH+30kb	2	N709-S505_GCTACGCT-GTAAGGAG
VP-MYC1_STITCH+440kb_1	4C	VP-MYC1	STITCH+440kb	1	N708-S502_CAGAGAGG-CTCTCTAT
VP-MYC2_del30-440_1	4C	VP-MYC2	del(30-440)	1	N701-S520_TAAGGCGA-AAGGCTAT
VP-MYC2_del30-440_2	4C	VP-MYC2	del(30-440)	2	N702-S501_CGTACTAG-TAGATCGC
VP-MYC2_delL_1	4C	VP-MYC2	delL	1	N705-S505_GGACTCCT-GTAAGGAG
VP-MYC2_delL_2	4C	VP-MYC2	delL	2	N702-S506_CGTACTAG-ACTGCATA
VP-MYC2_delL1-R2_1	4C	VP-MYC2	del(L1-R2)	1	N711-S510_AAGAGGCA-CGTCTAAT
VP-MYC2_delL1-R2_2	4C	VP-MYC2	del(L1-R2)	2	N709-S501_GCTACGCT-TAGATCGC
VP-MYC2_delL1-R2_3	4C	VP-MYC2	del(L1-R2)	3	N710-S502_CGAGGCTG-CTCTCTAT
VP-MYC2_delL1-R3_1	4C	VP-MYC2	del(L1-R3)	1	N710-S511_CGAGGCTG-TCTCTCCG
VP-MYC2_delL1-R3_2	4C	VP-MYC2	del(L1-R3)	2	N708-S520_CAGAGAGG-AAGGCTAT
VP-MYC2_delL2-R2_1	4C	VP-MYC2	del(L2-R2)	1	N708-S508_CAGAGAGG-CTAAGCCT
VP-MYC2_delL2-R2_2	4C	VP-MYC2	del(L2-R2)	2	N710-S504_CGAGGCTG-AGAGTAGA
VP-MYC2_delL2-R2_3	4C	VP-MYC2	del(L2-R2)	3	N703-S507_AGGCAGAA-AAGGAGTA
VP-MYC2_delR_1	4C	VP-MYC2	delR	1	N706-S506_TAGGCATG-ACTGCATA
VP-MYC2_delR_2	4C	VP-MYC2	delR	2	N704-S508_TCCTGAGC-CTAAGCCT
VP-MYC2_DOX_1	4C	VP-MYC2	DOX	1	N709-S507_GCTACGCT-AAGGAGTA
VP-MYC2_DOX_2	4C	VP-MYC2	DOX	2	N704-S505_TCCTGAGC-GTAAGGAG
VP-MYC2_DOX0h-_1	4C	VP-MYC2	DOX0h-	1	N708-S506_CAGAGAGG-ACTGCATA
VP-MYC2_DOX16h_1	4C	VP-MYC2	DOX16h	1	N706-S504_TAGGCATG-AGAGTAGA
VP-MYC2_DOX24h_1	4C	VP-MYC2	DOX24h	1	N707-S505_CTCTCTAC-GTAAGGAG
VP-MYC2_DOX4h_1	4C	VP-MYC2	DOX4h	1	N704-S502_TCCTGAGC-CTCTCTAT
VP-MYC2_DOX8h_1	4C	VP-MYC2	DOX8h	1	N705-S503_GGACTCCT-TATCCTCT
VP-MYC2_Hap_1	4C	VP-MYC2	Hap	1	N702-S502_CGTACTAG-CTCTCTAT
VP-MYC2_Hap_2	4C	VP-MYC2	Hap	2	N703-S510_AGGCAGAA-CGTCTAAT
VP-MYC2_invL1-R3_1	4C	VP-MYC2	inv(L1-R3)	1	N709-S510_GCTACGCT-CGTCTAAT
VP-MYC2_invL1-R3_2	4C	VP-MYC2	inv(L1-R3)	2	N711-S505_AAGAGGCA-GTAAGGAG
VP-MYC2_invR_1	4C	VP-MYC2	invR	1	N707-S507_CTCTCTAC-AAGGAGTA
VP-MYC2_invR_2	4C	VP-MYC2	invR	2	N701-S505_TAAGGCGA-GTAAGGAG
VP-MYC2_noDOX_1	4C	VP-MYC2	noDOX	1	N710-S508_CGAGGCTG-CTAAGCCT
VP-MYC2_noDOX_2	4C	VP-MYC2	noDOX	2	N703-S504_AGGCAGAA-AGAGTAGA
VP-MYC2_noDOX0h+_1	4C	VP-MYC2	noDOX0h+	1	N703-S501_AGGCAGAA-TAGATCGC
VP-MYC2_noDOX16h_1	4C	VP-MYC2	noDOX16h	1	N701-S518_TAAGGCGA-CTATTAAG
VP-MYC2_noDOX24h_1	4C	VP-MYC2	noDOX24h	1	N702-S520_CGTACTAG-AAGGCTAT
VP-MYC2_noDOX4h_1	4C	VP-MYC2	noDOX4h	1	N711-S513_AAGAGGCA-TCGACTAG
VP-MYC2_noDOX8h_1	4C	VP-MYC2	noDOX8h	1	N712-S517_GTAGAGGA-GCGTAAGA
VP-MYC2_STITCH-30kb_1	4C	VP-MYC2	STITCH-30kb	1	N707-S513_CTCTCTAC-TCGACTAG
VP-MYC2_STITCH-30kb_2	4C	VP-MYC2	STITCH-30kb	2	N708-S517_CAGAGAGG-GCGTAAGA
VP-MYC2_STITCH+30kb_1	4C	VP-MYC2	STITCH+30kb	1	N703-S503_AGGCAGAA-TATCCTCT
VP-MYC2_STITCH+30kb_2	4C	VP-MYC2	STITCH+30kb	2	N704-S504_TCCTGAGC-AGAGTAGA
VP-MYC2_STITCH+30kb_3	4C	VP-MYC2	STITCH+30kb	3	N704-S511_TCCTGAGC-TCTCTCCG
VP-MYC2_STITCH+440kb_1	4C	VP-MYC2	STITCH+440kb	1	N712-S502_GTAGAGGA-CTCTCTAT
VP-MYC2_STITCH+440kb_2	4C	VP-MYC2	STITCH+440kb	2	N701-S503_TAAGGCGA-TATCCTCT
VP-MYC2_STITCH+440kb_3	4C	VP-MYC2	STITCH+440kb	3	N702-S503_CGTACTAG-TATCCTCT
VP-STITCH-left_Hap_1	4C	VP-STITCH-left	Hap	1	N707-S502_CTCTCTAC-CTCTCTAT
VP-STITCH-left_STITCH+30kb_1	4C	VP-STITCH-left	STITCH+30kb	1	N708-S503_CAGAGAGG-TATCCTCT
VP-STITCH-left_STITCH+30kb_2	4C	VP-STITCH-left	STITCH+30kb	2	N711-S506_AAGAGGCA-ACTGCATA
VP-STITCH-left_delR_1	4C	VP-STITCH-left	delR	1	N710-S505_CGAGGCTG-GTAAGGAG
VP-STITCH-left_delR_2	4C	VP-STITCH-left	delR	2	N712-S507_GTAGAGGA-AAGGAGTA
VP-STITCH-left_delL_1	4C	VP-STITCH-left	delL	1	N709-S504_GCTACGCT-AGAGTAGA
VP-STITCH-right_Hap_1	4C	VP-STITCH-right	Hap	1	N701-S508_TAAGGCGA-CTAAGCCT
VP-STITCH-right_STITCH+30kb_1	4C	VP-STITCH-right	STITCH+30kb	1	N702-S510_CGTACTAG-CGTCTAAT
VP-STITCH-right_STITCH+30kb_2	4C	VP-STITCH-right	STITCH+30kb	2	N705-S517_GGACTCCT-GCGTAAGA
VP-STITCH-right_delR_1	4C	VP-STITCH-right	delR	1	N704-S513_TCCTGAGC-TCGACTAG
VP-STITCH-right_delR_2	4C	VP-STITCH-right	delR	2	N706-S518_TAGGCATG-CTATTAAG
VP-STITCH-right_delL_1	4C	VP-STITCH-right	delL	1	N703-S511_AGGCAGAA-TCTCTCCG
VP-NEUROG2_iPSC-DOX_1	4C	VP-NEUROG2	iPSC-DOX	1	N712-S510_GTAGAGGA-CGTCTAAT
VP-NEUROG2_iPSC-noDOX_1	4C	VP-NEUROG2	iPSC-noDOX	1	N711-S508_AAGAGGCA-CTAAGCCT
VP-NEUROG2_NPC-DOX_1	4C	VP-NEUROG2	NPC-DOX	1	N702-S513_CGTACTAG-TCGACTAG
VP-NEUROG2_NPC-noDOX_1	4C	VP-NEUROG2	NPC-noDOX	1	N701-S511_TAAGGCGA-TCTCTCCG
CTCF_DOX_1	nChIP-seq	CTCF	DOX	1	NEB2-S511_CGATGTAT-TCTCTCCG
CTCF_DOX_2	nChIP-seq	CTCF	DOX	2	NEB3-S511_TTAGGCAT-TCTCTCCG
CTCF_noDOX_1	nChIP-seq	CTCF	noDOX	1	NEB1-S510_ATCACGAT-CGTCTAAT
CTCF_noDOX_2	nChIP-seq	CTCF	noDOX	2	NEB2-S510_CGATGTAT-CGTCTAAT
CTCF_STITCH+30kb_1	nChIP-seq	CTCF	STITCH+30kb	1	NEB3-S513_TTAGGCAT-TCGACTAG
CTCF_STITCH+30kb_2	nChIP-seq	CTCF	STITCH+30kb	2	NEB4-S513_TGACCAAT-TCGACTAG
K27Ac_Hap_1	nChIP-seq	K27Ac	Hap	1	NEB8-S504_ACTTGAAT-AGAGTAGA
K27Ac_Hap_2	nChIP-seq	K27Ac	Hap	2	NEB2-S513_CGATGTAT-TCGACTAG
K27Ac_STITCH+30kb_1	nChIP-seq	K27Ac	STITCH+30kb	1	NEB9-S505_GATCAGAT-GTAAGGAG
K27Ac_STITCH+30kb_2	nChIP-seq	K27Ac	STITCH+30kb	2	NEB3-S517_TTAGGCAT-GCGTAAGA
K27me3_Hap_1	nChIP-seq	K27me3	Hap	1	NEB5-S503_ACAGTGAT-TATCCTCT
K27me3_Hap_2	nChIP-seq	K27me3	Hap	2	NEB6-S504_GCCAATAT-AGAGTAGA
K27me3_STITCH+30kb_1	nChIP-seq	K27me3	STITCH+30kb	1	NEB10-S507_TAGCTTAT-AAGGAGTA
K27me3_STITCH+30kb_2	nChIP-seq	K27me3	STITCH+30kb	2	NEB12-S508_CTTGTAAT-CTAAGCCT
K4me3_Hap_1	nChIP-seq	K4me3	Hap	1	NEB5-S513_ACAGTGAT-TCGACTAG
K4me3_Hap_2	nChIP-seq	K4me3	Hap	2	NEB6-S517_GCCAATAT-GCGTAAGA
K4me3_STITCH+30kb_1	nChIP-seq	K4me3	STITCH+30kb	1	NEB11-S503_GGCTACAT-TATCCTCT
K4me3_STITCH+30kb_2	nChIP-seq	K4me3	STITCH+30kb	2	NEB12-S504_CTTGTAAT-AGAGTAGA
K9me3_DOX_1	nChIP-seq	K9me3	DOX	1	NEB5-S518_ACAGTGAT-CTATTAAG
K9me3_DOX_2	nChIP-seq	K9me3	DOX	2	NEB1-S508_ATCACGAT-CTAAGCCT
K9me3_noDOX_1	nChIP-seq	K9me3	noDOX	1	NEB8-S502_ACTTGAAT-CTCTCTAT
K9me3_noDOX_2	nChIP-seq	K9me3	noDOX	2	NEB12-S507_CTTGTAAT-AAGGAGTA
RNA_del30-440_1	RNA-seq	NA	del30-440	1	N702-S518_CGTACTAG-CTATTAAG
RNA_del30-440_2	RNA-seq	NA	del30-440	2	N703-S520_AGGCAGAA-AAGGCTAT
RNA_del30-440_3	RNA-seq	NA	del30-440	3	N704-S501_TCCTGAGC-TAGATCGC
RNA_Hap_1	RNA-seq	NA	Hap	1	N707-S506_CTCTCTAC-ACTGCATA
RNA_Hap_2	RNA-seq	NA	Hap	2	N708-S507_CAGAGAGG-AAGGAGTA
RNA_Hap_3	RNA-seq	NA	Hap	3	N709-S508_GCTACGCT-CTAAGCCT
RNA_+30kb_1	RNA-seq	NA	STITCH+30kb	1	N711-S511_AAGAGGCA-TCTCTCCG
RNA_+30kb_2	RNA-seq	NA	STITCH+30kb	2	N712-S513_GTAGAGGA-TCGACTAG
RNA_+30kb_3	RNA-seq	NA	STITCH+30kb	3	N701-S517_TAAGGCGA-GCGTAAGA
